# Supplementary material for: Understanding Horizontal Gene Transfer network in human gut microbiota
Source: PubMed Central journal article supplement (PMC7346641; doi:10.1186/s13099-020-00370-9), 2020-07-09
Supplement: 13099_2020_370_MOESM5_ESM.pdf [file 13099_2020_370_MOESM5_ESM.pdf]

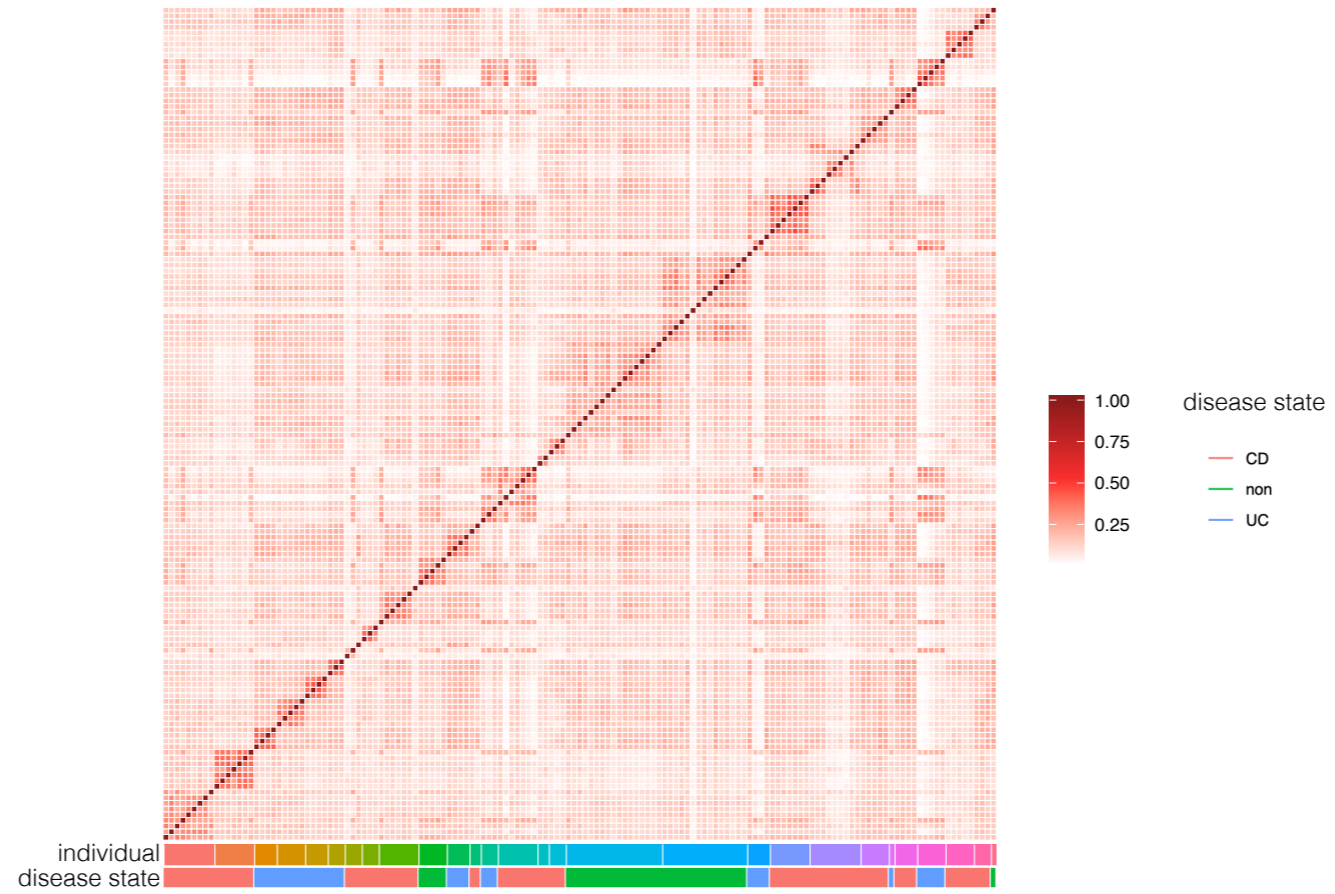

Additional file 5 Fig.1. Heatmap of IBD networks Jaccard similarity.

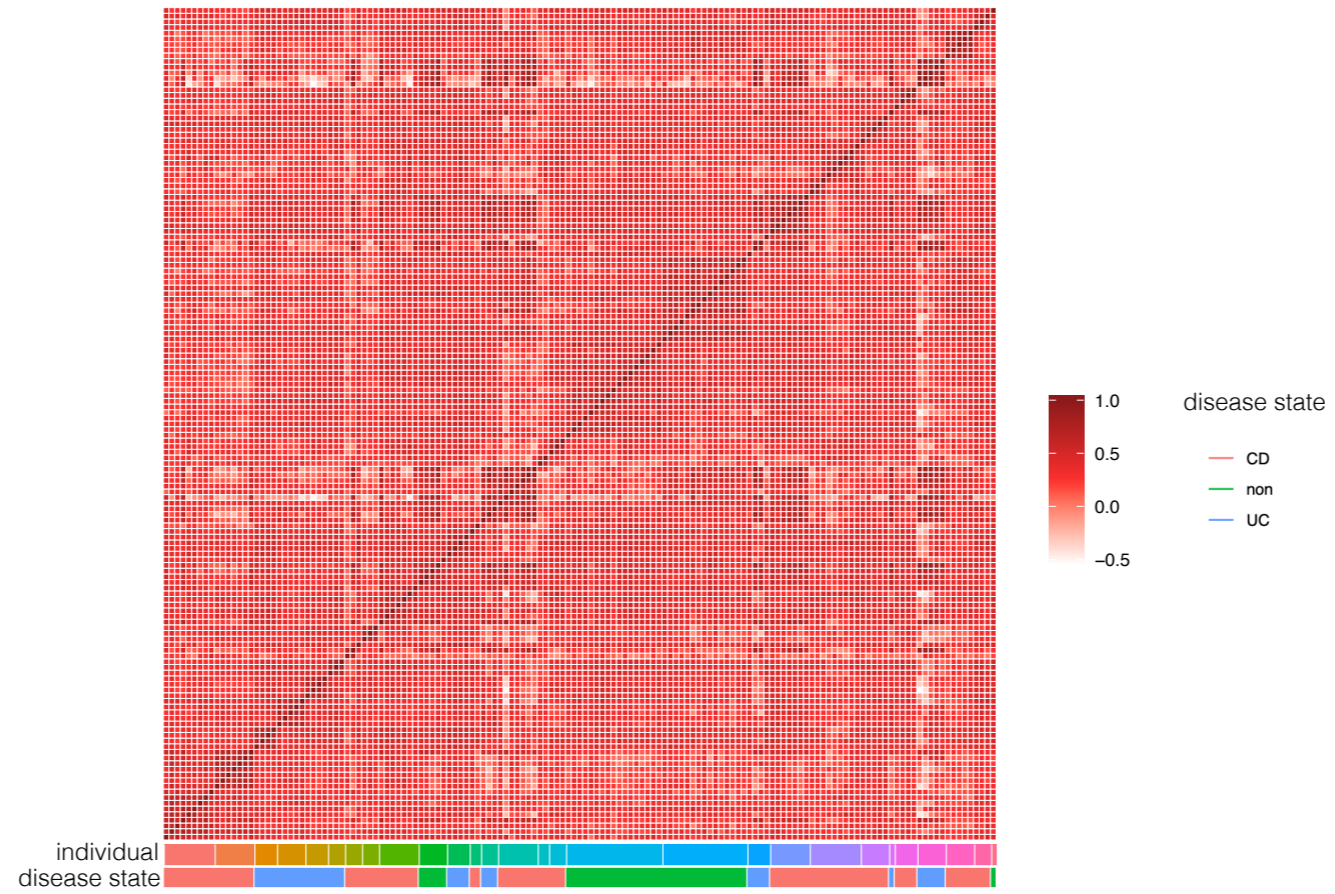

Additional file 5 Fig.2. Heatmap of IBD networks degree similarity.

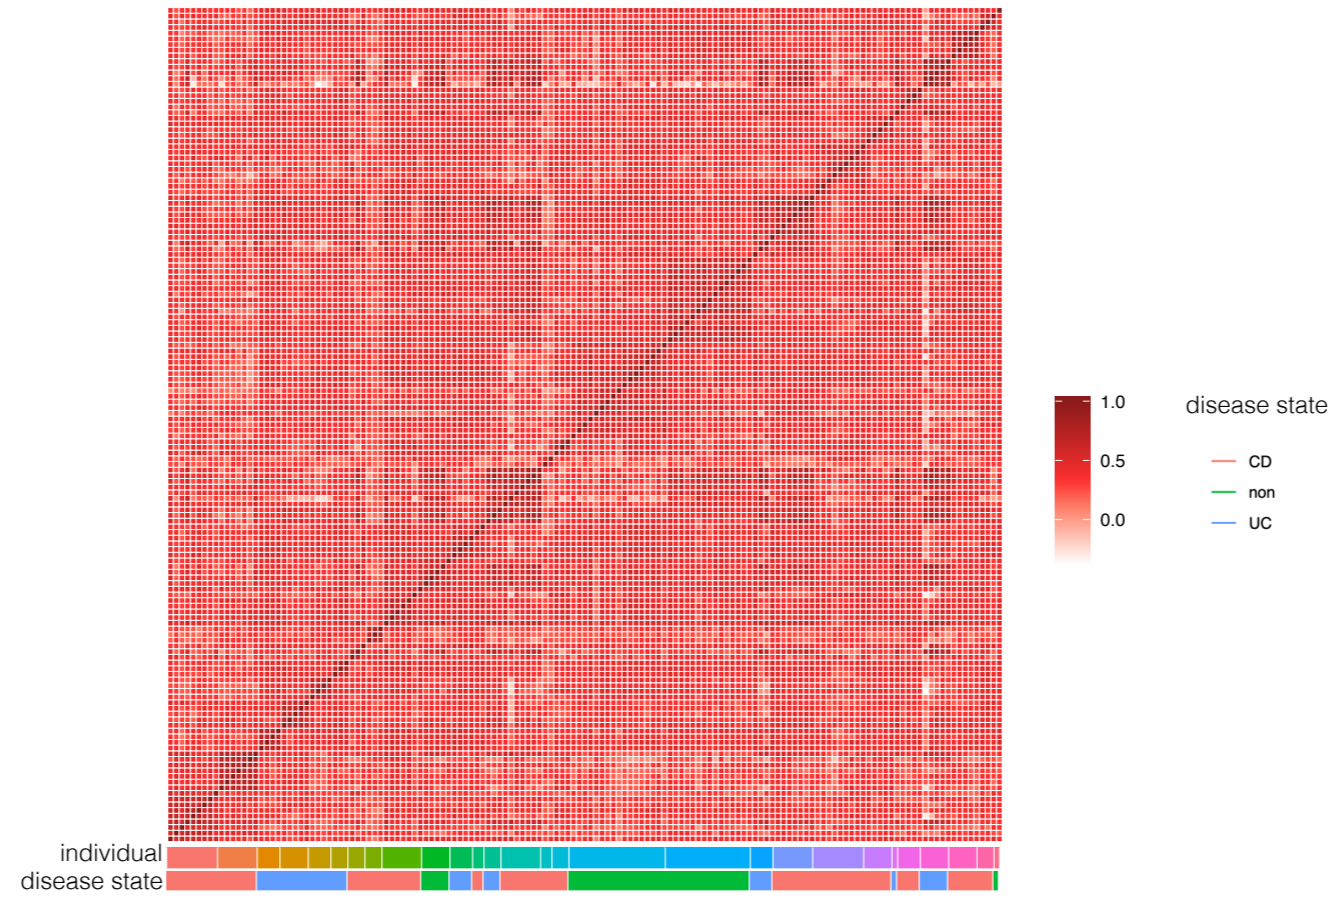

Additional file 5 Fig.3. Heatmap of IBD networks PageRank similarity.

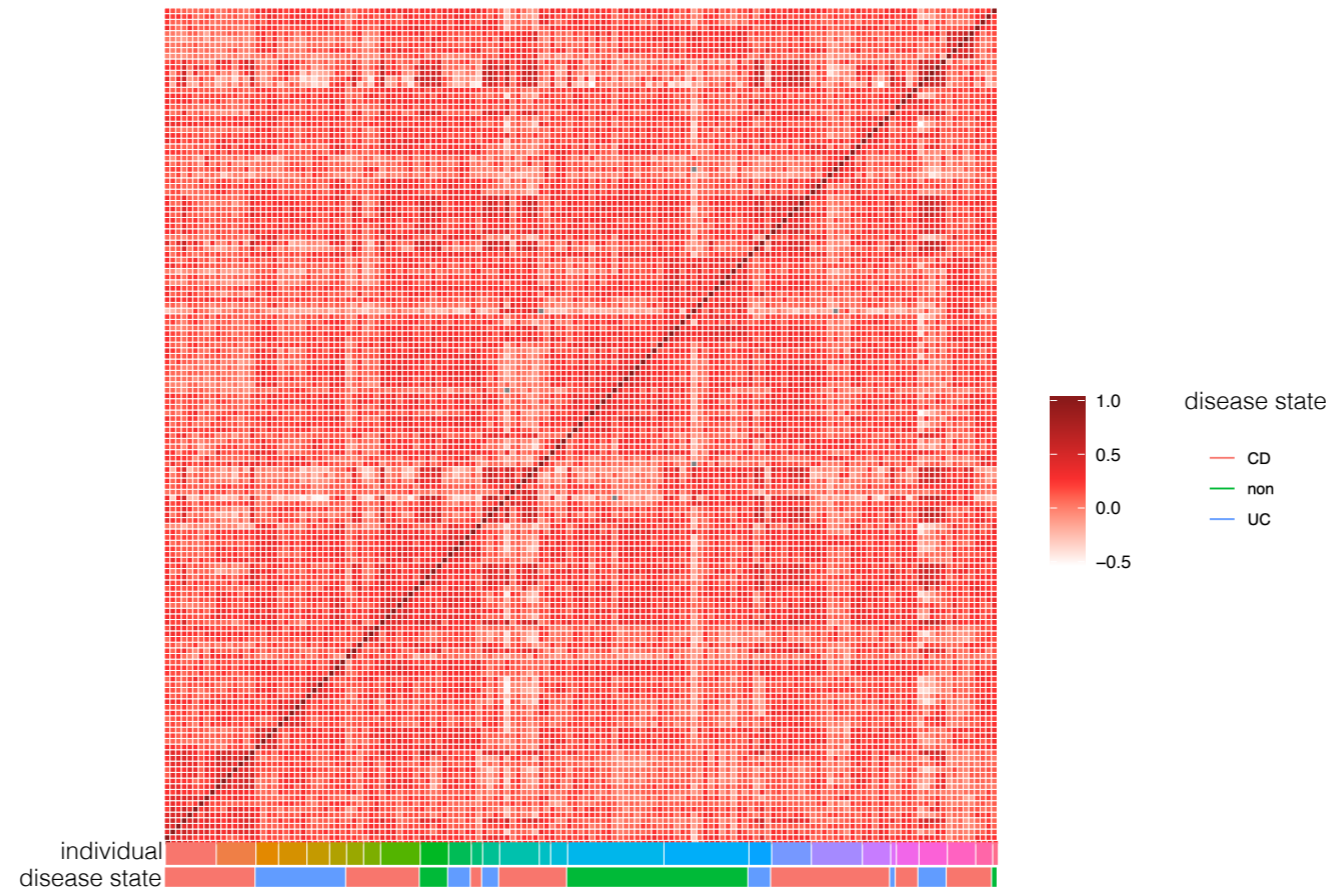

Additional file 5 Fig.4. Heatmap of IBD networks clustering coefficient similarity.

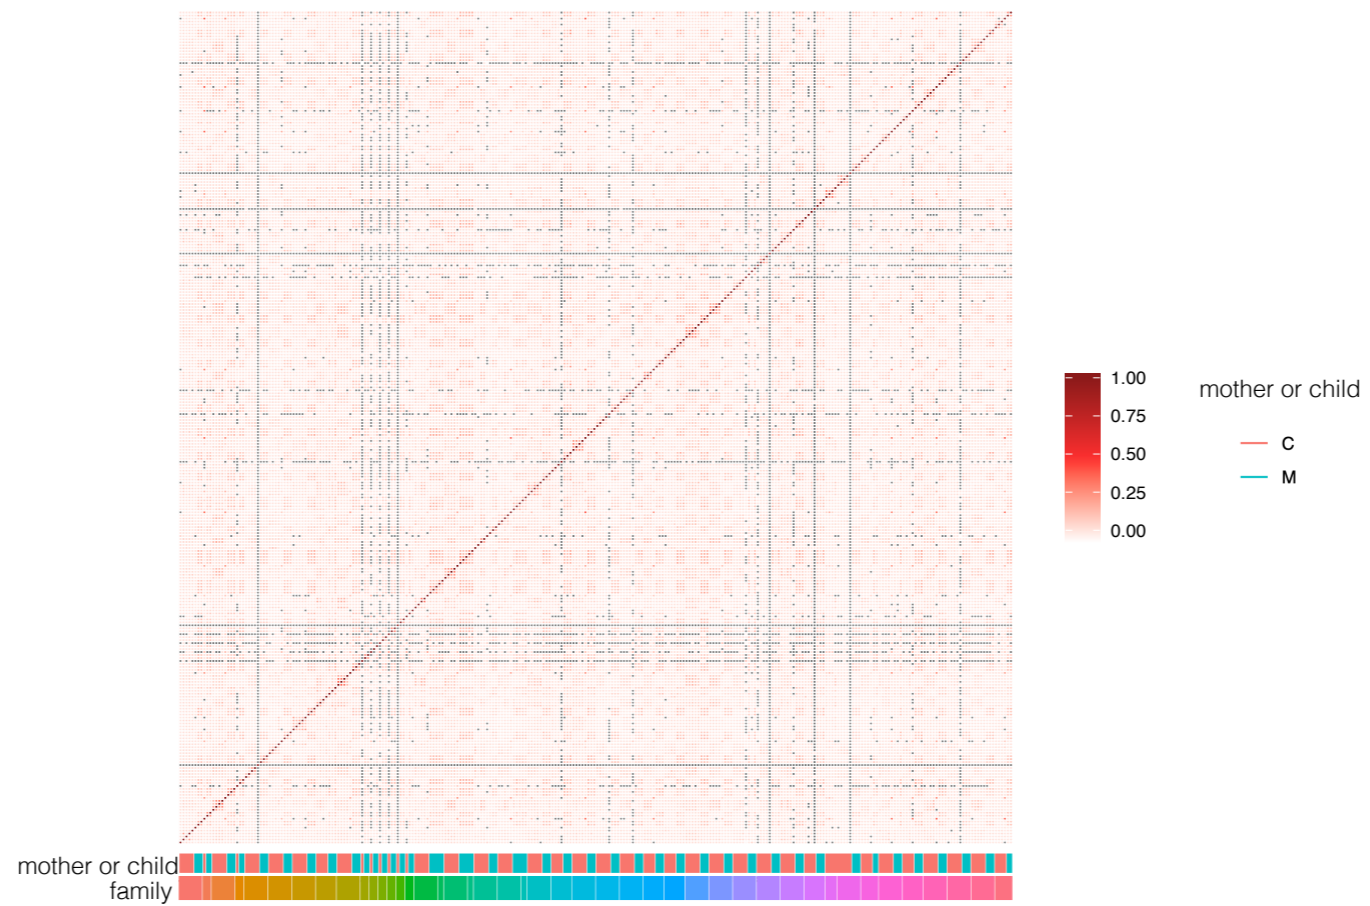

Additional file 5 Fig.5. Heatmap of Infant networks similarity. The network similarity is defined as Jaccard similarity\*degree correlation
