# Supplementary material for: Understanding Horizontal Gene Transfer network in human gut microbiota
Source: Gut Pathog. 2020 Jul 9;12:33. doi: 10.1186/s13099-020-00370-9 (PMC7346641; doi:10.1186/s13099-020-00370-9)
Supplement: Supplementary file 1 — Additional file 1. Spearman correlation between degrees of nodes in HGT networks in IBD dataset. [file 13099_2020_370_MOESM1_ESM.csv]

	C3001_1_CD	C3001_10_CD	C3001_2_CD	C3001_3_CD	C3001_4_CD	C3001_5_CD	C3001_7_CD	C3001_8_CD	C3001_9_CD	C3002_1_CD	C3002_2_CD	C3002_3_CD	C3002_4_CD	C3002_5_CD	C3002_6_CD	C3002_7_CD	C3003_2_UC	C3003_3_UC	C3003_5_UC	C3003_7_UC	C3004_1_UC	C3004_3_UC	C3004_4_UC	C3004_5_UC	C3004_6_UC	C3005_2_UC	C3005_3_UC	C3005_5_UC	C3005_6_UC	C3006_1_UC	C3006_2_UC	C3006_4_UC	C3007_1_CD	C3007_2_CD	C3007_4_CD	C3008_1_CD	C3008_3_CD	C3008_4_CD	E5001_1_CD	E5001_2_CD	E5001_3_CD	E5001_4_CD	E5001_7_CD	E5001_8_CD	E5001_9_CD	E5002_2_non	E5002_3_non	E5002_4_non	E5002_5_non
C3001_1_CD	1	0.510126789417037	0.681603104484013	0.553836404699468	0.587350769368325	0.48393818860786	0.457375057420409	0.547635169143208	0.514777970611663	0.338556527696613	0.286302437823775	0.313432251240162	0.294501457036235	0.381516744664396	0.286747572279182	0.52246516106538	0.38627034683619	0.350454247473606	0.366170011575847	0.342482408749702	0.354850490404732	0.276308864931827	0.22618429472602	0.334190472600413	0.442358356368759	0.356266811894285	0.30955942890836	0.287155034773048	0.28752740460629	0.369537262673851	0.324441730780418	0.317605017569381	0.192378774731391	0.427992938906741	0.337127254948157	0.209561184360178	0.259480314269853	0.213892045056418	0.526370264852503	0.375333327994029	0.38551777175313	0.334388535998722	0.324882870668075	0.318090978513767	0.438446899922112	0.444862978767641	0.532412619856087	0.498845144217078	0.40840854147947
C3001_10_CD	0.510126789417037	1	0.54442340619868	0.741186029228839	0.661345093026241	0.718737055676414	0.684711854323369	0.682539860286824	0.328664210946596	0.566943896996818	0.452967846218443	0.552194031579133	0.477924629724396	0.605436985747019	0.580278758438666	0.586622176431499	0.431458343548246	0.317118012933482	0.290875178843027	0.407261990531113	0.422076395331622	0.272126071222409	0.356695794229054	0.415604655195364	0.409457219816717	0.309662233531166	0.315053359780681	0.317756022104133	0.425402266948467	0.293890137223521	0.335585213704157	0.29562495959459	0.273023758536058	0.155014344105089	0.290292555209264	0.389040227279648	0.426320419865528	0.424557856700028	0.38113260245113	0.354851134001806	0.450016934570786	0.32334394080959	0.430707404526087	0.306025879744768	0.372478390864746	0.259760645476822	0.238468923560334	0.195839168067162	0.210770129878299
C3001_2_CD	0.681603104484013	0.54442340619868	1	0.504790338620483	0.584276354965262	0.474477583247581	0.491085641194251	0.605144277467947	0.564833146216926	0.397567209331262	0.250956122556597	0.326913481191931	0.380714192351807	0.408901848008707	0.387558568480047	0.431865959103799	0.251476738395603	0.205788317240029	0.210063070643881	0.228280003173387	0.297950244460981	0.320547051544149	0.237942088887621	0.293360751361151	0.447084074065244	0.240949331608913	0.195341760765552	0.214351317891638	0.216671195323369	0.245279451750364	0.241031233498203	0.183154147802531	0.185138984615203	0.266541776482482	0.174620025993454	0.222731481786857	0.185659583006065	0.218139216859342	0.363953558741826	0.323367280132616	0.224607652343263	0.262557342570815	0.25202851673183	0.246213018166997	0.363606771729589	0.299986392735848	0.330556050217392	0.278558566639227	0.237558255437222
C3001_3_CD	0.553836404699468	0.741186029228839	0.504790338620483	1	0.623684240059019	0.758359813977319	0.541312111905944	0.705880496920595	0.39009526636596	0.447986217374027	0.331159975175293	0.466337002162324	0.373812797103032	0.558276592946478	0.534916746515	0.642910767001646	0.363443963064616	0.321336937846394	0.228757960775819	0.356411598183157	0.41813001705253	0.273060594116142	0.307918001081876	0.301391061607299	0.328962572700321	0.230053308049607	0.206745503766646	0.202342294955072	0.232816473799886	0.173805796012007	0.282420387650594	0.216911796220671	0.283011609357517	0.530993550562922	0.347505791861402	0.110883161065304	0.261195856650414	0.15123105075004	0.665349414879142	0.29607417622674	0.439988294115219	0.281543479651507	0.23836929765964	0.208461609856902	0.490777978579547	0.53324706774942	0.483199747719835	0.51328801937695	0.55647804464705
C3001_4_CD	0.587350769368325	0.661345093026241	0.584276354965262	0.623684240059019	1	0.708392256783535	0.494034564388525	0.625527384569625	0.517228503369179	0.463715768746316	0.305306987017454	0.435736896947995	0.411126679417007	0.410278541601721	0.428452166295489	0.331323093683315	0.420920375353703	0.422895675887752	0.360369082823035	0.388351707146314	0.256493711106336	0.245308190846492	0.20217427260229	0.237265327877555	0.419870106643585	0.359077560143036	0.380419993824758	0.323227893252167	0.367227277864032	0.251123699920787	0.275412661823464	0.238706812222312	0.0894942424185315	0.0526662851497266	0.31415680168757	0.291139199720307	0.29066681024109	0.26361347760702	0.308435905665633	0.415405872979525	0.384288375302435	0.313701002135929	0.42482148944948	0.3912886419169	0.421063121313816	0.298357546356327	0.347360080665951	0.26654621638288	0.24964588803808
C3001_5_CD	0.48393818860786	0.718737055676414	0.474477583247581	0.758359813977319	0.708392256783535	1	0.535966407091099	0.640385562061358	0.37779944215721	0.473085854808076	0.235767493732317	0.478098590012078	0.431879369147635	0.441164701524989	0.432764763361252	0.404390436226513	0.447096940367523	0.35895874283789	0.338283524017148	0.347116989718678	0.363350054304829	0.41703096806438	0.263603059109896	0.300930774816285	0.33885511129461	0.341533830057918	0.331586929956542	0.317443010397844	0.384095637007718	0.309447350469033	0.409581301465077	0.324581879318581	0.025620234810835	0.128036247046292	0.448401961600694	0.279407617592639	0.299414332683513	0.239023921143778	0.48275481212671	0.439545479428666	0.443669880759282	0.345258956562071	0.418815885043139	0.355811247937759	0.517135982975087	0.455738254830695	0.425038436318013	0.411747797721641	0.477162597535748
C3001_7_CD	0.457375057420409	0.684711854323369	0.491085641194251	0.541312111905944	0.494034564388525	0.535966407091099	1	0.621643807651245	0.409027099303246	0.362244189228079	0.313731248171398	0.331013090280552	0.340926234603927	0.390057199368462	0.355995064712171	0.288769814170135	0.253751670489782	0.219603852690486	0.223937901029029	0.263279282413519	0.431247286022696	0.358601355117841	0.387568251719948	0.460736231815852	0.4296400916246	0.329445959406189	0.274350731210512	0.327188609374706	0.331386842888085	0.31387917883024	0.308150113539826	0.317992200667039	0.33127896962538	0.1881156374994	0.165625382796263	0.243740963276487	0.313132157473702	0.26372538746692	0.245313826891091	0.242949045518309	0.341628867890193	0.21613070054817	0.292751080498708	0.323984925704068	0.309017021853925	0.227034111767021	0.188319653518259	0.0808374589630195	0.187184563492186
C3001_8_CD	0.547635169143208	0.682539860286824	0.605144277467947	0.705880496920595	0.625527384569625	0.640385562061358	0.621643807651245	1	0.493278360420133	0.497372543124964	0.339454892849153	0.431443734964492	0.543429068207909	0.482391952289986	0.464882657682753	0.466927893090442	0.271364701827863	0.295104499931926	0.18966263545841	0.28796400545962	0.43438626471619	0.292648909545893	0.361022502075163	0.411246034088141	0.443639098368004	0.274503388181752	0.294693947024677	0.308102806779987	0.413927810434349	0.205544383479747	0.270059590902242	0.282597476221393	0.288945076877213	0.21890669086552	0.238091808620589	0.251014046877548	0.398513431098692	0.257815469754888	0.390676837858897	0.357557437236488	0.339634784544853	0.279651533752437	0.311322046848747	0.357741486065044	0.386857394943541	0.35545739445934	0.291657206868004	0.282702881132013	0.322403808416743
C3001_9_CD	0.514777970611663	0.328664210946596	0.564833146216926	0.39009526636596	0.517228503369179	0.37779944215721	0.409027099303246	0.493278360420133	1	0.361296210281734	0.397440793065422	0.269467711812362	0.363982038263555	0.397370273096737	0.34255284574108	0.34661766308437	0.293295317679666	0.338967406666343	0.287998462433302	0.252242301495413	0.31513558606793	0.290657802342724	0.28996649499259	0.317809021906605	0.430547273709515	0.317784937587226	0.282637580506562	0.321167355443167	0.28791684877184	0.268634054531554	0.28530193885088	0.248046173382846	0.511463186013345	0.41781760450824	0.305290113640672	0.244539734735358	0.301235930361738	0.386721354861781	0.177182460394441	0.304050328404811	0.260669866454123	0.280638452088675	0.264812031491745	0.266354050862105	0.15373387433267	0.269827407323881	0.257188303420793	0.213843968245836	0.118625898118164
C3002_1_CD	0.338556527696613	0.566943896996818	0.397567209331262	0.447986217374027	0.463715768746316	0.473085854808076	0.362244189228079	0.497372543124964	0.361296210281734	1	0.581816887537053	0.642689024939236	0.581500603987799	0.664581559265415	0.698443153234959	0.63516954823249	0.364018240145213	0.336955259121334	0.2973800584664	0.333773705540852	0.397196802981596	0.369679934863581	0.354437921342656	0.321221270423588	0.344331620304093	0.181720903504761	0.214625292516023	0.155631243689015	0.293227950085707	0.312242007239897	0.361503608354996	0.281686630107164	0.226984213262551	-0.0397899985265219	0.293665679944555	0.373740599100001	0.455653465293346	0.299485163263972	0.192626679231095	0.470503955252637	0.381474762557139	0.366901104490022	0.470597184570162	0.267845719399312	0.449308059000962	0.214808551484641	0.223460172937821	0.0544388881560459	0.0993783983542432
C3002_2_CD	0.286302437823775	0.452967846218443	0.250956122556597	0.331159975175293	0.305306987017454	0.235767493732317	0.313731248171398	0.339454892849153	0.397440793065422	0.581816887537053	1	0.649543447301	0.628788549768344	0.674652738967437	0.677051431594255	0.658221891501261	0.296265863641278	0.327464914092421	0.312876829688518	0.303247948517174	0.428079982098796	0.448259349692881	0.423511722473165	0.453814534710643	0.408836418006475	0.210794055285602	0.241237617225942	0.170922672102215	0.274421165690892	0.377253610551204	0.297635018587091	0.334333038068458	0.43891950206349	0.13767373727277	0.290791260717074	0.382544366071743	0.391016670128928	0.305606799150579	0.219234252670054	0.463365068469195	0.41894829167605	0.388337889440025	0.470228136196012	0.304236494426306	0.336116356894914	0.261890882196495	0.233827091848329	0.100003447983034	0.0864227615426663
C3002_3_CD	0.313432251240162	0.552194031579133	0.326913481191931	0.466337002162324	0.435736896947995	0.478098590012078	0.331013090280552	0.431443734964492	0.269467711812362	0.642689024939236	0.649543447301	1	0.626518113709277	0.72858161244953	0.679033418266585	0.680114070764625	0.316411680770731	0.334843908062061	0.220843253983556	0.262780681397164	0.357614164785825	0.381926807389204	0.351877325858213	0.355698771568414	0.327660692259764	0.233892555137225	0.231597635471892	0.196966012071469	0.226823735107469	0.330630255899214	0.343621577560372	0.299019590138903	0.227303413718629	0.0978498456496286	0.277556735886131	0.288641443166506	0.268485606043885	0.254680581604632	0.199105586354113	0.395978139906874	0.366893855659139	0.311441999326708	0.447881142853916	0.270140787198819	0.288992091806738	0.340810828614258	0.26891744407735	0.188169606448001	0.262805127513854
C3002_4_CD	0.294501457036235	0.477924629724396	0.380714192351807	0.373812797103032	0.411126679417007	0.431879369147635	0.340926234603927	0.543429068207909	0.363982038263555	0.581500603987799	0.628788549768344	0.626518113709277	1	0.594885793432933	0.650988877388918	0.513368573735045	0.248303829810512	0.302561569509289	0.277208630516664	0.295081761152346	0.363092113977928	0.294903623045651	0.373486819983774	0.309089112479953	0.368657096915955	0.262942764212216	0.260902834590251	0.1931904766225	0.252844834122229	0.303263813086511	0.233419589759947	0.220848088520732	0.278493418485687	0.0715788157648759	0.318153433164363	0.302588449789495	0.401145974276068	0.363762632149218	0.0928873881141938	0.337974567375043	0.398028439263873	0.278522742856013	0.378007247526997	0.303550303942738	0.308031897669594	0.200023254226468	0.148443811063556	0.0596967837399457	0.0485248506094562
C3002_5_CD	0.381516744664396	0.605436985747019	0.408901848008707	0.558276592946478	0.410278541601721	0.441164701524989	0.390057199368462	0.482391952289986	0.397370273096737	0.664581559265415	0.674652738967437	0.72858161244953	0.594885793432933	1	0.745694043903824	0.699115299038423	0.3233018201461	0.309745760019073	0.277602265485235	0.332100078365281	0.438524476732529	0.342445202960159	0.351497192887988	0.375217958134024	0.36464409060208	0.2075894514461	0.22812761459427	0.201056911796876	0.291893760723488	0.373792973591893	0.333882050520347	0.316220341518494	0.265013698171202	0.159595822524165	0.234646078311319	0.347395970452376	0.295726320722613	0.285142981758479	0.173266237051901	0.353846545849795	0.448998310955441	0.302640534144721	0.356253861868107	0.203352820144196	0.420248311782143	0.31532920421137	0.29837108103044	0.195804982547489	0.212230680543384
C3002_6_CD	0.286747572279182	0.580278758438666	0.387558568480047	0.534916746515	0.428452166295489	0.432764763361252	0.355995064712171	0.464882657682753	0.34255284574108	0.698443153234959	0.677051431594255	0.679033418266585	0.650988877388918	0.745694043903824	1	0.735055471343735	0.316941775793742	0.260922374374164	0.274748308197625	0.333998720480582	0.322437538206649	0.279380181049795	0.307500434122991	0.308372303757688	0.348367238738406	0.267401082954495	0.258100162507169	0.200144874939112	0.220615073533172	0.322418218222163	0.298746722412484	0.234374309621363	0.13844779722906	0.122092546926495	0.206997496986491	0.297906580789611	0.379894869375029	0.30137040235244	0.38965869892468	0.469590373730568	0.463778893643687	0.344152274542816	0.399091864359338	0.22527419097979	0.24932095968587	0.273866968188965	0.257878483336681	0.136306396428493	0.0753235563374909
C3002_7_CD	0.52246516106538	0.586622176431499	0.431865959103799	0.642910767001646	0.331323093683315	0.404390436226513	0.288769814170135	0.466927893090442	0.34661766308437	0.63516954823249	0.658221891501261	0.680114070764625	0.513368573735045	0.699115299038423	0.735055471343735	1	0.356111282392615	0.356474505019531	0.351532877680337	0.37546349134703	0.434149393935966	0.359221880782208	0.430818228928091	0.411501535288888	0.288536173361474	0.251406461826813	0.208285339960631	0.170083956020177	0.287260865295528	0.379682915959467	0.347211570850258	0.368069663185869	0.183533212059357	0.429295128261395	0.284808128570648	0.295467902552577	0.350544556755041	0.255646644792732	0.573016085944001	0.440217491515853	0.457105286651998	0.430526855025254	0.379827245093616	0.193876203439014	0.437357285579746	0.552264121273774	0.566696160315125	0.553616987759101	0.413467851249275
C3003_2_UC	0.38627034683619	0.431458343548246	0.251476738395603	0.363443963064616	0.420920375353703	0.447096940367523	0.253751670489782	0.271364701827863	0.293295317679666	0.364018240145213	0.296265863641278	0.316411680770731	0.248303829810512	0.3233018201461	0.316941775793742	0.356111282392615	1	0.60922948345834	0.67812965295114	0.680552539513724	0.370065381915165	0.273957795069246	0.362138376952055	0.389985275438533	0.327091691874028	0.414580364643772	0.472461827490191	0.411193379537492	0.40616564933872	0.421861342801896	0.447530477425133	0.381864360988262	0.23336474930855	0.252950213442063	0.45672491989189	0.29925748238633	0.299633187334409	0.411838540026035	0.467493979571116	0.467472849423976	0.493440077923498	0.34944626449517	0.457814634276651	0.349883890570315	0.371034261676019	0.35906934251512	0.396076441149352	0.407462440585529	0.479951618423129
C3003_3_UC	0.350454247473606	0.317118012933482	0.205788317240029	0.321336937846394	0.422895675887752	0.35895874283789	0.219603852690486	0.295104499931926	0.338967406666343	0.336955259121334	0.327464914092421	0.334843908062061	0.302561569509289	0.309745760019073	0.260922374374164	0.356474505019531	0.60922948345834	1	0.66700748024703	0.644029233082282	0.362722804524258	0.23637832175195	0.377475850779482	0.395397023733724	0.338766288832038	0.439062637494708	0.437169652603887	0.351478926433695	0.42342922302124	0.426258256498339	0.458181756465081	0.466825125861539	0.0129996806562418	0.18793678163299	0.464335092702655	0.319395891149176	0.34751775697044	0.40252566287448	0.485645820209717	0.521824019761013	0.466279516477315	0.474661560037824	0.491748373911556	0.291056870210163	0.420838323289207	0.419149998056445	0.368124674576893	0.448605107710269	0.302520784441422
C3003_5_UC	0.366170011575847	0.290875178843027	0.210063070643881	0.228757960775819	0.360369082823035	0.338283524017148	0.223937901029029	0.18966263545841	0.287998462433302	0.2973800584664	0.312876829688518	0.220843253983556	0.277208630516664	0.277602265485235	0.274748308197625	0.351532877680337	0.67812965295114	0.66700748024703	1	0.654711106016292	0.408979331355716	0.264508789418916	0.413640880612349	0.442248611597336	0.420702839226374	0.451796919939863	0.43429066666286	0.428814823332138	0.457953007961856	0.464041402599226	0.473409887443646	0.444971853332787	0.0734953296750841	0.293868474026338	0.489307103071169	0.335812522332766	0.3433525106108	0.471286370152211	0.50547405826804	0.503630855021313	0.538470381927814	0.405473973152385	0.529328761981875	0.342283693061048	0.454560896920192	0.431157072950786	0.424744799291299	0.451862972282713	0.406933374314795
C3003_7_UC	0.342482408749702	0.407261990531113	0.228280003173387	0.356411598183157	0.388351707146314	0.347116989718678	0.263279282413519	0.28796400545962	0.252242301495413	0.333773705540852	0.303247948517174	0.262780681397164	0.295081761152346	0.332100078365281	0.333998720480582	0.37546349134703	0.680552539513724	0.644029233082282	0.654711106016292	1	0.380762119127219	0.342317390381965	0.397915175248682	0.46128078367038	0.390042771472205	0.459568601034512	0.485051518824226	0.426359665583903	0.416072895066712	0.480574769537708	0.515382894504609	0.436930883131798	0.155302466976394	0.294839438350503	0.486001213817351	0.272989562986713	0.30260364983401	0.400780525342829	0.513305815970821	0.489422907923884	0.508792205497611	0.391579812920394	0.494415831432694	0.344274028413354	0.504184138313685	0.405287180140287	0.358139095213171	0.397476099007986	0.427242717116511
C3004_1_UC	0.354850490404732	0.422076395331622	0.297950244460981	0.41813001705253	0.256493711106336	0.363350054304829	0.431247286022696	0.43438626471619	0.31513558606793	0.397196802981596	0.428079982098796	0.357614164785825	0.363092113977928	0.438524476732529	0.322437538206649	0.434149393935966	0.370065381915165	0.362722804524258	0.408979331355716	0.380762119127219	1	0.567141974296092	0.748855960797515	0.709924320660657	0.672840206535755	0.384900629214698	0.369338297021842	0.402839105303883	0.439490580795779	0.470463349300561	0.48245001989247	0.372725584287286	0.284124145212546	0.354998823506445	0.430166136895416	0.289274757681961	0.289973230452095	0.273620230078084	0.415667243297869	0.324483391715983	0.421399828042393	0.31258780986314	0.317084173401375	0.219305385503911	0.282622502518396	0.315493621266146	0.402743302555078	0.226025225343552	0.34907086268757
C3004_3_UC	0.276308864931827	0.272126071222409	0.320547051544149	0.273060594116142	0.245308190846492	0.41703096806438	0.358601355117841	0.292648909545893	0.290657802342724	0.369679934863581	0.448259349692881	0.381926807389204	0.294903623045651	0.342445202960159	0.279380181049795	0.359221880782208	0.273957795069246	0.23637832175195	0.264508789418916	0.342317390381965	0.567141974296092	1	0.507981289743591	0.547701784534747	0.497166374052425	0.369107294157823	0.28621103155692	0.397656876170478	0.302630173842633	0.390177225132599	0.479742108784857	0.383927089791896	0.226927969537389	0.239987422097507	0.370470148135451	0.330066268184785	0.265408524304182	0.208070785724474	0.379067528670266	0.294558167215239	0.297915343390449	0.26375796409534	0.240683979735347	0.300630063099877	0.352065488841781	0.38047372922992	0.36094945152635	0.289947429276612	0.459592316347103
C3004_4_UC	0.22618429472602	0.356695794229054	0.237942088887621	0.307918001081876	0.20217427260229	0.263603059109896	0.387568251719948	0.361022502075163	0.28996649499259	0.354437921342656	0.423511722473165	0.351877325858213	0.373486819983774	0.351497192887988	0.307500434122991	0.430818228928091	0.362138376952055	0.377475850779482	0.413640880612349	0.397915175248682	0.748855960797515	0.507981289743591	1	0.673712350091203	0.678791340701552	0.387029054135129	0.365205473130089	0.394166160674165	0.413242715076755	0.455308877644061	0.456362772352154	0.388006711915605	0.315565632566208	0.243211201420823	0.331427578785711	0.297594539625498	0.320200568195262	0.304461616996481	0.294782951517934	0.28382758273505	0.333661936477178	0.281268810160692	0.335711102955874	0.17675051304302	0.254671384594216	0.27513363855265	0.304710998636424	0.1976306634192	0.292907357605238
C3004_5_UC	0.334190472600413	0.415604655195364	0.293360751361151	0.301391061607299	0.237265327877555	0.300930774816285	0.460736231815852	0.411246034088141	0.317809021906605	0.321221270423588	0.453814534710643	0.355698771568414	0.309089112479953	0.375217958134024	0.308372303757688	0.411501535288888	0.389985275438533	0.395397023733724	0.442248611597336	0.46128078367038	0.709924320660657	0.547701784534747	0.673712350091203	1	0.605167250140109	0.40292370128206	0.33551307767742	0.398612260077076	0.42145883875516	0.43811152133398	0.428750258084627	0.354435202450501	0.161840726116556	0.296210493558543	0.417576030079112	0.291922365163162	0.252437959465365	0.372604249299103	0.347958115105934	0.316051002756561	0.284194068145615	0.263491056952305	0.303031632093648	0.212917588558485	0.256188211743828	0.317084129798639	0.328540814176752	0.290144206212072	0.344896805975435
C3004_6_UC	0.442358356368759	0.409457219816717	0.447084074065244	0.328962572700321	0.419870106643585	0.33885511129461	0.4296400916246	0.443639098368004	0.430547273709515	0.344331620304093	0.408836418006475	0.327660692259764	0.368657096915955	0.36464409060208	0.348367238738406	0.288536173361474	0.327091691874028	0.338766288832038	0.420702839226374	0.390042771472205	0.672840206535755	0.497166374052425	0.678791340701552	0.605167250140109	1	0.403441675077566	0.293721135817228	0.374848929778451	0.381316625505047	0.397732285678763	0.376845815304096	0.310561392645142	0.308148886068962	0.0997656254043098	0.362681833791962	0.262343041385988	0.301514321359884	0.252112448580444	0.160046975054998	0.287337526652964	0.293015084012688	0.273083503514851	0.311850568351979	0.241705346805057	0.308067022784846	0.233237605633681	0.269413851789637	0.180727358448013	0.22887262832644
C3005_2_UC	0.356266811894285	0.309662233531166	0.240949331608913	0.230053308049607	0.359077560143036	0.341533830057918	0.329445959406189	0.274503388181752	0.317784937587226	0.181720903504761	0.210794055285602	0.233892555137225	0.262942764212216	0.2075894514461	0.267401082954495	0.251406461826813	0.414580364643772	0.439062637494708	0.451796919939863	0.459568601034512	0.384900629214698	0.369107294157823	0.387029054135129	0.40292370128206	0.403441675077566	1	0.610601629882875	0.660314928684536	0.635595690658452	0.445610461364271	0.403744654802075	0.376915633352228	0.122419185799894	0.18939754362457	0.43674850000048	0.436019405627054	0.467099602032893	0.420831938494157	0.372489728775252	0.404491629264684	0.436632048948356	0.331392479717375	0.437890198230587	0.245713437576836	0.420115525421578	0.295299398948877	0.348491590378718	0.344660214811529	0.288218300214189
C3005_3_UC	0.30955942890836	0.315053359780681	0.195341760765552	0.206745503766646	0.380419993824758	0.331586929956542	0.274350731210512	0.294693947024677	0.282637580506562	0.214625292516023	0.241237617225942	0.231597635471892	0.260902834590251	0.22812761459427	0.258100162507169	0.208285339960631	0.472461827490191	0.437169652603887	0.43429066666286	0.485051518824226	0.369338297021842	0.28621103155692	0.365205473130089	0.33551307767742	0.293721135817228	0.610601629882875	1	0.726717207789878	0.61659904318429	0.45925148364611	0.410256405678944	0.3966839499611	0.287166388720747	0.285521215524225	0.457356343205186	0.348287686124936	0.387765953479862	0.429046029927611	0.321128760363182	0.440639761170411	0.479756121712939	0.403631727882066	0.437694645948079	0.372118469461213	0.345741209833196	0.252282836203334	0.341459489328868	0.34406032088377	0.198054958838701
C3005_5_UC	0.287155034773048	0.317756022104133	0.214351317891638	0.202342294955072	0.323227893252167	0.317443010397844	0.327188609374706	0.308102806779987	0.321167355443167	0.155631243689015	0.170922672102215	0.196966012071469	0.1931904766225	0.201056911796876	0.200144874939112	0.170083956020177	0.411193379537492	0.351478926433695	0.428814823332138	0.426359665583903	0.402839105303883	0.397656876170478	0.394166160674165	0.398612260077076	0.374848929778451	0.660314928684536	0.726717207789878	1	0.683328342346326	0.430917054901677	0.375689246445341	0.346812739998905	0.247397355089149	0.329761865506341	0.443371798915877	0.353452073980982	0.415681492777594	0.417399518273022	0.339508190039981	0.37866154413757	0.436354312225837	0.312437459903205	0.393749467880033	0.337300757450889	0.343452758742065	0.271903111803214	0.351845146929041	0.30883080184551	0.313228758348253
C3005_6_UC	0.28752740460629	0.425402266948467	0.216671195323369	0.232816473799886	0.367227277864032	0.384095637007718	0.331386842888085	0.413927810434349	0.28791684877184	0.293227950085707	0.274421165690892	0.226823735107469	0.252844834122229	0.291893760723488	0.220615073533172	0.287260865295528	0.40616564933872	0.42342922302124	0.457953007961856	0.416072895066712	0.439490580795779	0.302630173842633	0.413242715076755	0.42145883875516	0.381316625505047	0.635595690658452	0.61659904318429	0.683328342346326	1	0.394381959455634	0.350878725596214	0.346369613358589	0.291565089968831	0.333557615800911	0.398725388573034	0.428351603832256	0.451460812221072	0.335074611279284	0.314369507668016	0.372829729288814	0.409860914663446	0.363740148886866	0.366455082943672	0.334663822323143	0.451626478115392	0.275656876111163	0.250454229739425	0.232592908297664	0.320027594722983
C3006_1_UC	0.369537262673851	0.293890137223521	0.245279451750364	0.173805796012007	0.251123699920787	0.309447350469033	0.31387917883024	0.205544383479747	0.268634054531554	0.312242007239897	0.377253610551204	0.330630255899214	0.303263813086511	0.373792973591893	0.322418218222163	0.379682915959467	0.421861342801896	0.426258256498339	0.464041402599226	0.480574769537708	0.470463349300561	0.390177225132599	0.455308877644061	0.43811152133398	0.397732285678763	0.445610461364271	0.45925148364611	0.430917054901677	0.394381959455634	1	0.612380058001889	0.641676001184565	0.169655091335168	0.153650888298266	0.407963444623882	0.324686679394709	0.350067796025005	0.409273206606726	0.324270476170276	0.435789563309028	0.416703698815074	0.401702554484793	0.515400099953795	0.278140048402704	0.424692659137783	0.342026730186871	0.320621093152827	0.344431580484656	0.182014606436472
C3006_2_UC	0.324441730780418	0.335585213704157	0.241031233498203	0.282420387650594	0.275412661823464	0.409581301465077	0.308150113539826	0.270059590902242	0.28530193885088	0.361503608354996	0.297635018587091	0.343621577560372	0.233419589759947	0.333882050520347	0.298746722412484	0.347211570850258	0.447530477425133	0.458181756465081	0.473409887443646	0.515382894504609	0.48245001989247	0.479742108784857	0.456362772352154	0.428750258084627	0.376845815304096	0.403744654802075	0.410256405678944	0.375689246445341	0.350878725596214	0.612380058001889	1	0.701061250105224	0.104790654723427	0.157178505145822	0.426382434838726	0.303733249066052	0.320381827181161	0.422286425776577	0.38105491304527	0.501629539643047	0.469119941912364	0.463515191208626	0.520918676753658	0.298805888662152	0.53352449703393	0.336687947655088	0.339148986902854	0.384768716321913	0.294081551349857
C3006_4_UC	0.317605017569381	0.29562495959459	0.183154147802531	0.216911796220671	0.238706812222312	0.324581879318581	0.317992200667039	0.282597476221393	0.248046173382846	0.281686630107164	0.334333038068458	0.299019590138903	0.220848088520732	0.316220341518494	0.234374309621363	0.368069663185869	0.381864360988262	0.466825125861539	0.444971853332787	0.436930883131798	0.372725584287286	0.383927089791896	0.388006711915605	0.354435202450501	0.310561392645142	0.376915633352228	0.3966839499611	0.346812739998905	0.346369613358589	0.641676001184565	0.701061250105224	1	0.106632300660758	0.186350294175602	0.422021352686607	0.366459553379436	0.393694013068957	0.450656247172094	0.32123150039223	0.510160411222977	0.423939985425742	0.487362180075348	0.509304445184002	0.315006930338074	0.456638976026282	0.363750093377774	0.364500985702272	0.374789769111506	0.270810126047321
C3007_1_CD	0.192378774731391	0.273023758536058	0.185138984615203	0.283011609357517	0.0894942424185315	0.025620234810835	0.33127896962538	0.288945076877213	0.511463186013345	0.226984213262551	0.43891950206349	0.227303413718629	0.278493418485687	0.265013698171202	0.13844779722906	0.183533212059357	0.23336474930855	0.0129996806562418	0.0734953296750841	0.155302466976394	0.284124145212546	0.226927969537389	0.315565632566208	0.161840726116556	0.308148886068962	0.122419185799894	0.287166388720747	0.247397355089149	0.291565089968831	0.169655091335168	0.104790654723427	0.106632300660758	1	0.68735546645337	0.079458832221351	0.262136131392233	0.283702549220842	0.224159370916481	0.167531901524336	0.0638769419784384	0.0707172878204381	0.0861273634407458	0.146016956452686	0.0872257455574489	-0.0311832580880349	0.124607529286086	0.0615920493589676	0.056380278400194	0.258601741864515
C3007_2_CD	0.427992938906741	0.155014344105089	0.266541776482482	0.530993550562922	0.0526662851497266	0.128036247046292	0.1881156374994	0.21890669086552	0.41781760450824	-0.0397899985265219	0.13767373727277	0.0978498456496286	0.0715788157648759	0.159595822524165	0.122092546926495	0.429295128261395	0.252950213442063	0.18793678163299	0.293868474026338	0.294839438350503	0.354998823506445	0.239987422097507	0.243211201420823	0.296210493558543	0.0997656254043098	0.18939754362457	0.285521215524225	0.329761865506341	0.333557615800911	0.153650888298266	0.157178505145822	0.186350294175602	0.68735546645337	1	0.429240392211074	0.224830343202899	0.249140958601853	0.20184098494291	0.700718084529714	0.199916110656301	0.370426229224557	0.178974165503563	0.105105550641931	0.0182563513318636	0.265203017799705	0.484756652424997	0.503850354452027	0.604315730207035	0.719508842908348
C3007_4_CD	0.337127254948157	0.290292555209264	0.174620025993454	0.347505791861402	0.31415680168757	0.448401961600694	0.165625382796263	0.238091808620589	0.305290113640672	0.293665679944555	0.290791260717074	0.277556735886131	0.318153433164363	0.234646078311319	0.206997496986491	0.284808128570648	0.45672491989189	0.464335092702655	0.489307103071169	0.486001213817351	0.430166136895416	0.370470148135451	0.331427578785711	0.417576030079112	0.362681833791962	0.43674850000048	0.457356343205186	0.443371798915877	0.398725388573034	0.407963444623882	0.426382434838726	0.422021352686607	0.079458832221351	0.429240392211074	1	0.308874553965157	0.300651295980012	0.286215242112167	0.438816974368921	0.440334724297789	0.488939359616562	0.378147221481297	0.433033695907645	0.359429301575133	0.457467576612118	0.455648955209893	0.454043121176062	0.447285316945478	0.519158740723226
C3008_1_CD	0.209561184360178	0.389040227279648	0.222731481786857	0.110883161065304	0.291139199720307	0.279407617592639	0.243740963276487	0.251014046877548	0.244539734735358	0.373740599100001	0.382544366071743	0.288641443166506	0.302588449789495	0.347395970452376	0.297906580789611	0.295467902552577	0.29925748238633	0.319395891149176	0.335812522332766	0.272989562986713	0.289274757681961	0.330066268184785	0.297594539625498	0.291922365163162	0.262343041385988	0.436019405627054	0.348287686124936	0.353452073980982	0.428351603832256	0.324686679394709	0.303733249066052	0.366459553379436	0.262136131392233	0.224830343202899	0.308874553965157	1	0.657927824655686	0.609298181112377	0.0730192730538727	0.331941287117579	0.329427821381128	0.293068303977073	0.370987158137257	0.253217891686122	0.254791022924717	0.232533865257832	0.254900548259831	0.118533735598454	0.0907877634731606
C3008_3_CD	0.259480314269853	0.426320419865528	0.185659583006065	0.261195856650414	0.29066681024109	0.299414332683513	0.313132157473702	0.398513431098692	0.301235930361738	0.455653465293346	0.391016670128928	0.268485606043885	0.401145974276068	0.295726320722613	0.379894869375029	0.350544556755041	0.299633187334409	0.34751775697044	0.3433525106108	0.30260364983401	0.289973230452095	0.265408524304182	0.320200568195262	0.252437959465365	0.301514321359884	0.467099602032893	0.387765953479862	0.415681492777594	0.451460812221072	0.350067796025005	0.320381827181161	0.393694013068957	0.283702549220842	0.249140958601853	0.300651295980012	0.657927824655686	1	0.653783984906897	0.103585081569996	0.34629082938091	0.334527121899098	0.291011975107772	0.363636180047455	0.330451518530722	0.154668179016428	0.309557270035802	0.217606722006882	0.110513185722744	0.180428226249421
C3008_4_CD	0.213892045056418	0.424557856700028	0.218139216859342	0.15123105075004	0.26361347760702	0.239023921143778	0.26372538746692	0.257815469754888	0.386721354861781	0.299485163263972	0.305606799150579	0.254680581604632	0.363762632149218	0.285142981758479	0.30137040235244	0.255646644792732	0.411838540026035	0.40252566287448	0.471286370152211	0.400780525342829	0.273620230078084	0.208070785724474	0.304461616996481	0.372604249299103	0.252112448580444	0.420831938494157	0.429046029927611	0.417399518273022	0.335074611279284	0.409273206606726	0.422286425776577	0.450656247172094	0.224159370916481	0.20184098494291	0.286215242112167	0.609298181112377	0.653783984906897	1	0.178492286707197	0.457991928233131	0.415651931127097	0.361346376143664	0.456109185050951	0.310301962803276	0.118833521265835	0.307187365491405	0.155317818795834	0.175630761385741	0.150925569045542
E5001_1_CD	0.526370264852503	0.38113260245113	0.363953558741826	0.665349414879142	0.308435905665633	0.48275481212671	0.245313826891091	0.390676837858897	0.177182460394441	0.192626679231095	0.219234252670054	0.199105586354113	0.0928873881141938	0.173266237051901	0.38965869892468	0.573016085944001	0.467493979571116	0.485645820209717	0.50547405826804	0.513305815970821	0.415667243297869	0.379067528670266	0.294782951517934	0.347958115105934	0.160046975054998	0.372489728775252	0.321128760363182	0.339508190039981	0.314369507668016	0.324270476170276	0.38105491304527	0.32123150039223	0.167531901524336	0.700718084529714	0.438816974368921	0.0730192730538727	0.103585081569996	0.178492286707197	1	0.609694281970701	0.637659405601158	0.590313554433219	0.484941255668927	0.348213820339842	0.631644098598759	0.566496206980475	0.606839683868639	0.641074367911676	0.712762187528122
E5001_2_CD	0.375333327994029	0.354851134001806	0.323367280132616	0.29607417622674	0.415405872979525	0.439545479428666	0.242949045518309	0.357557437236488	0.304050328404811	0.470503955252637	0.463365068469195	0.395978139906874	0.337974567375043	0.353846545849795	0.469590373730568	0.440217491515853	0.467472849423976	0.521824019761013	0.503630855021313	0.489422907923884	0.324483391715983	0.294558167215239	0.28382758273505	0.316051002756561	0.287337526652964	0.404491629264684	0.440639761170411	0.37866154413757	0.372829729288814	0.435789563309028	0.501629539643047	0.510160411222977	0.0638769419784384	0.199916110656301	0.440334724297789	0.331941287117579	0.34629082938091	0.457991928233131	0.609694281970701	1	0.636904110897766	0.605564725865492	0.650460880923433	0.407915844079639	0.526569917989738	0.434487783302526	0.446364516521253	0.507142418490549	0.420417225938458
E5001_3_CD	0.38551777175313	0.450016934570786	0.224607652343263	0.439988294115219	0.384288375302435	0.443669880759282	0.341628867890193	0.339634784544853	0.260669866454123	0.381474762557139	0.41894829167605	0.366893855659139	0.398028439263873	0.448998310955441	0.463778893643687	0.457105286651998	0.493440077923498	0.466279516477315	0.538470381927814	0.508792205497611	0.421399828042393	0.297915343390449	0.333661936477178	0.284194068145615	0.293015084012688	0.436632048948356	0.479756121712939	0.436354312225837	0.409860914663446	0.416703698815074	0.469119941912364	0.423939985425742	0.0707172878204381	0.370426229224557	0.488939359616562	0.329427821381128	0.334527121899098	0.415651931127097	0.637659405601158	0.636904110897766	1	0.551563264739791	0.632124109273522	0.564251389414692	0.604012175758142	0.428760981543262	0.465204946005667	0.360928496374897	0.416346570003639
E5001_4_CD	0.334388535998722	0.32334394080959	0.262557342570815	0.281543479651507	0.313701002135929	0.345258956562071	0.21613070054817	0.279651533752437	0.280638452088675	0.366901104490022	0.388337889440025	0.311441999326708	0.278522742856013	0.302640534144721	0.344152274542816	0.430526855025254	0.34944626449517	0.474661560037824	0.405473973152385	0.391579812920394	0.31258780986314	0.26375796409534	0.281268810160692	0.263491056952305	0.273083503514851	0.331392479717375	0.403631727882066	0.312437459903205	0.363740148886866	0.401702554484793	0.463515191208626	0.487362180075348	0.0861273634407458	0.178974165503563	0.378147221481297	0.293068303977073	0.291011975107772	0.361346376143664	0.590313554433219	0.605564725865492	0.551563264739791	1	0.545623577576801	0.385213037463928	0.504442023787647	0.402325807225111	0.453104057801886	0.481045184702419	0.391516858252713
E5001_7_CD	0.324882870668075	0.430707404526087	0.25202851673183	0.23836929765964	0.42482148944948	0.418815885043139	0.292751080498708	0.311322046848747	0.264812031491745	0.470597184570162	0.470228136196012	0.447881142853916	0.378007247526997	0.356253861868107	0.399091864359338	0.379827245093616	0.457814634276651	0.491748373911556	0.529328761981875	0.494415831432694	0.317084173401375	0.240683979735347	0.335711102955874	0.303031632093648	0.311850568351979	0.437890198230587	0.437694645948079	0.393749467880033	0.366455082943672	0.515400099953795	0.520918676753658	0.509304445184002	0.146016956452686	0.105105550641931	0.433033695907645	0.370987158137257	0.363636180047455	0.456109185050951	0.484941255668927	0.650460880923433	0.632124109273522	0.545623577576801	1	0.473545836542615	0.600432991136083	0.323581076482793	0.390365121640069	0.391103068351187	0.306273517710635
E5001_8_CD	0.318090978513767	0.306025879744768	0.246213018166997	0.208461609856902	0.3912886419169	0.355811247937759	0.323984925704068	0.357741486065044	0.266354050862105	0.267845719399312	0.304236494426306	0.270140787198819	0.303550303942738	0.203352820144196	0.22527419097979	0.193876203439014	0.349883890570315	0.291056870210163	0.342283693061048	0.344274028413354	0.219305385503911	0.300630063099877	0.17675051304302	0.212917588558485	0.241705346805057	0.245713437576836	0.372118469461213	0.337300757450889	0.334663822323143	0.278140048402704	0.298805888662152	0.315006930338074	0.0872257455574489	0.0182563513318636	0.359429301575133	0.253217891686122	0.330451518530722	0.310301962803276	0.348213820339842	0.407915844079639	0.564251389414692	0.385213037463928	0.473545836542615	1	0.60457578769301	0.290150982560169	0.391279187946881	0.263458207482088	0.318793484595349
E5001_9_CD	0.438446899922112	0.372478390864746	0.363606771729589	0.490777978579547	0.421063121313816	0.517135982975087	0.309017021853925	0.386857394943541	0.15373387433267	0.449308059000962	0.336116356894914	0.288992091806738	0.308031897669594	0.420248311782143	0.24932095968587	0.437357285579746	0.371034261676019	0.420838323289207	0.454560896920192	0.504184138313685	0.282622502518396	0.352065488841781	0.254671384594216	0.256188211743828	0.308067022784846	0.420115525421578	0.345741209833196	0.343452758742065	0.451626478115392	0.424692659137783	0.53352449703393	0.456638976026282	-0.0311832580880349	0.265203017799705	0.457467576612118	0.254791022924717	0.154668179016428	0.118833521265835	0.631644098598759	0.526569917989738	0.604012175758142	0.504442023787647	0.600432991136083	0.60457578769301	1	0.458544897116466	0.513911379399947	0.483967354503176	0.571480018191945
E5002_2_non	0.444862978767641	0.259760645476822	0.299986392735848	0.53324706774942	0.298357546356327	0.455738254830695	0.227034111767021	0.35545739445934	0.269827407323881	0.214808551484641	0.261890882196495	0.340810828614258	0.200023254226468	0.31532920421137	0.273866968188965	0.552264121273774	0.35906934251512	0.419149998056445	0.431157072950786	0.405287180140287	0.315493621266146	0.38047372922992	0.27513363855265	0.317084129798639	0.233237605633681	0.295299398948877	0.252282836203334	0.271903111803214	0.275656876111163	0.342026730186871	0.336687947655088	0.363750093377774	0.124607529286086	0.484756652424997	0.455648955209893	0.232533865257832	0.309557270035802	0.307187365491405	0.566496206980475	0.434487783302526	0.428760981543262	0.402325807225111	0.323581076482793	0.290150982560169	0.458544897116466	1	0.647046370305603	0.653500331561688	0.519854104322433
E5002_3_non	0.532412619856087	0.238468923560334	0.330556050217392	0.483199747719835	0.347360080665951	0.425038436318013	0.188319653518259	0.291657206868004	0.257188303420793	0.223460172937821	0.233827091848329	0.26891744407735	0.148443811063556	0.29837108103044	0.257878483336681	0.566696160315125	0.396076441149352	0.368124674576893	0.424744799291299	0.358139095213171	0.402743302555078	0.36094945152635	0.304710998636424	0.328540814176752	0.269413851789637	0.348491590378718	0.341459489328868	0.351845146929041	0.250454229739425	0.320621093152827	0.339148986902854	0.364500985702272	0.0615920493589676	0.503850354452027	0.454043121176062	0.254900548259831	0.217606722006882	0.155317818795834	0.606839683868639	0.446364516521253	0.465204946005667	0.453104057801886	0.390365121640069	0.391279187946881	0.513911379399947	0.647046370305603	1	0.707869145203135	0.572074201665745
E5002_4_non	0.498845144217078	0.195839168067162	0.278558566639227	0.51328801937695	0.26654621638288	0.411747797721641	0.0808374589630195	0.282702881132013	0.213843968245836	0.0544388881560459	0.100003447983034	0.188169606448001	0.0596967837399457	0.195804982547489	0.136306396428493	0.553616987759101	0.407462440585529	0.448605107710269	0.451862972282713	0.397476099007986	0.226025225343552	0.289947429276612	0.1976306634192	0.290144206212072	0.180727358448013	0.344660214811529	0.34406032088377	0.30883080184551	0.232592908297664	0.344431580484656	0.384768716321913	0.374789769111506	0.056380278400194	0.604315730207035	0.447285316945478	0.118533735598454	0.110513185722744	0.175630761385741	0.641074367911676	0.507142418490549	0.360928496374897	0.481045184702419	0.391103068351187	0.263458207482088	0.483967354503176	0.653500331561688	0.707869145203135	1	0.5953580031854
E5002_5_non	0.40840854147947	0.210770129878299	0.237558255437222	0.55647804464705	0.24964588803808	0.477162597535748	0.187184563492186	0.322403808416743	0.118625898118164	0.0993783983542432	0.0864227615426663	0.262805127513854	0.0485248506094562	0.212230680543384	0.0753235563374909	0.413467851249275	0.479951618423129	0.302520784441422	0.406933374314795	0.427242717116511	0.34907086268757	0.459592316347103	0.292907357605238	0.344896805975435	0.22887262832644	0.288218300214189	0.198054958838701	0.313228758348253	0.320027594722983	0.182014606436472	0.294081551349857	0.270810126047321	0.258601741864515	0.719508842908348	0.519158740723226	0.0907877634731606	0.180428226249421	0.150925569045542	0.712762187528122	0.420417225938458	0.416346570003639	0.391516858252713	0.306273517710635	0.318793484595349	0.571480018191945	0.519854104322433	0.572074201665745	0.5953580031854	1
E5002_6_non	0.447673022902533	0.32920561977196	0.292799507709717	0.280222513108624	0.397152021257686	0.364082623093024	0.24138991212807	0.290266116775953	0.290463060381894	0.286948352850541	0.340075882906664	0.329416367242151	0.353626392383457	0.350177775506208	0.268437071068082	0.393607236827836	0.394588605235606	0.399195564334269	0.420111185953491	0.458266121245234	0.35185164506549	0.257197301325552	0.285337293804282	0.299063158611661	0.393965132725281	0.325097717764591	0.375826097117742	0.266795442706299	0.265866783302338	0.472605592678326	0.445340567262039	0.450838283109602	0.154866861249057	0.168876597132564	0.481932873679794	0.355900204230915	0.262199981154374	0.291157056070102	0.252282313496823	0.434561962576193	0.440348748755339	0.448709196764353	0.473784327575875	0.391059350500595	0.512249841339521	0.484261779077849	0.52744891980644	0.488309078292831	0.316257931754662
E5004_2_UC	0.470561192858977	0.355929864930584	0.299911768096865	0.399320005501291	0.539274732433293	0.48642807776778	0.232114917670082	0.372064431352882	0.385319671742074	0.441630508421989	0.287105213526494	0.39429414494138	0.40393646688472	0.356200676343101	0.322705788506453	0.430158086130641	0.565260092561668	0.58235952570233	0.510560602313605	0.557225637100577	0.335629906239889	0.314135008589241	0.375479618143646	0.326534220991695	0.397325077313907	0.428683178298137	0.435981355216228	0.35320991728191	0.398739780690791	0.419524632148737	0.456015854500115	0.426198772739387	0.0681646016717907	0.236891224052594	0.620065761182164	0.250871709827843	0.306564326621421	0.353112529992217	0.492118004651303	0.519044149959378	0.423531167961795	0.486328048331383	0.478863972005549	0.34382683957341	0.532061983272634	0.4243281310303	0.487250941976196	0.539517802203127	0.487307159437474
E5004_3_UC	0.423127967968045	0.446728443979621	0.290033680399257	0.336041797602861	0.391769758451273	0.48245152703066	0.313603005705114	0.37424193025185	0.29231983080574	0.354647618776287	0.37799358974816	0.39769416285389	0.387093862529864	0.334804565642739	0.338892550389532	0.372110417982334	0.54839481989619	0.501515747919049	0.533027215592628	0.554726226293016	0.441134423566354	0.369649942283779	0.415933773484081	0.419564459850591	0.427085055359514	0.448126066239943	0.452236168946005	0.439418072847729	0.420881561002904	0.431529938051661	0.461771313644453	0.413969747627311	0.162475806427964	0.277672750639269	0.633550885800475	0.270087633925041	0.354025203693951	0.400136968530435	0.484973157778783	0.512640002931245	0.465121422781798	0.502900031004341	0.521336508657259	0.335808187406261	0.487694702918313	0.401501954985097	0.433328108951539	0.434975879067098	0.441174880094472
E5004_4_UC	0.449599043203961	0.310959885189297	0.325493511653219	0.296751453251834	0.484709936824385	0.35806425961444	0.257954857931807	0.385930855019902	0.429263066067891	0.392150345361412	0.280715200678512	0.312966995607363	0.30057934817228	0.22400712974929	0.287338780918441	0.292324473185525	0.458898530936333	0.502691502774679	0.478840875851723	0.498151983863637	0.406145330366034	0.39226642230738	0.363721379297472	0.366524908189662	0.421545262700911	0.40800375882573	0.515618188197938	0.468474572614498	0.362176142918212	0.426426726304429	0.417708816612325	0.373031679562166	0.091927757348618	0.243194141536619	0.62375710249825	0.317313215451633	0.358205586362932	0.34399472199068	0.47190490066844	0.414549237156688	0.496925000348209	0.437436479329272	0.437744362516761	0.487545185302972	0.517137089777638	0.351888518160592	0.47824516376918	0.412270563808547	0.457705742721754
E5004_6_UC	0.395805172988423	0.377627601725371	0.245098129392802	0.391626675577021	0.39353473828704	0.42688386651428	0.246284349581751	0.369438059958493	0.284412960729233	0.32068281377502	0.376441377708125	0.326757934489665	0.334042392848605	0.280048721027092	0.270188453349531	0.373864573674476	0.54338283199752	0.455560245275334	0.543092641358455	0.53831262460408	0.417142171079174	0.364402241611013	0.418761649952213	0.407812020632934	0.388866846965672	0.438144329745373	0.444538041998782	0.454211892368945	0.457462784781716	0.441768093346504	0.442331640706096	0.436586566710686	0.276429464418132	0.278438724978719	0.746942551269312	0.373595309718261	0.362853557426519	0.395123344768826	0.530616636961329	0.425661839716174	0.465830384589928	0.458686836124303	0.485265673661492	0.376076582524534	0.550314334451833	0.411917329462419	0.473412180514487	0.431380866965776	0.505032785792665
E5006_1_CD	0.338483849188262	0.435137028315359	0.204626642941391	0.333509367838312	0.417863431924278	0.493733434630487	0.356432846424069	0.308198633485248	0.235110562002763	0.374707146226873	0.356925544706987	0.34861784234298	0.343487283742661	0.337523879440649	0.366977628868763	0.353459538645503	0.44839030582155	0.41921776543081	0.401609935820979	0.46819478604564	0.373738474454548	0.394077338538292	0.350736061847673	0.349448144569477	0.317753857324011	0.432646227313195	0.398504549712645	0.384141633359795	0.37241749506314	0.434751369631459	0.463094092303987	0.460363448785903	0.0495634469625842	0.129938999141277	0.481505366017771	0.317101999786048	0.358442340280513	0.353340748045634	0.430768859013267	0.46916554670756	0.449273857742734	0.472319165535574	0.478176169517159	0.277770377430921	0.470806238831734	0.38503814802859	0.343633766859017	0.398289578774894	0.302556317560602
E5006_2_CD	0.210900451265367	0.149749593285638	0.177368570008869	0.024436562537576	0.228798027960982	0.266835067335967	0.124063176636798	0.177890995274412	0.148772123197523	0.183592423602015	0.18921130728208	0.105270772459157	0.169957143069466	-0.0066123564965617	0.0760947174721967	0.0345484915543008	0.379027576909834	0.475577452739989	0.389999485093419	0.330036695581576	0.184489011658261	0.263495995021433	0.206881213143345	0.17030356693765	0.210174427644378	0.345010476735424	0.318709013104855	0.202102930411618	0.282883499603182	0.342483035848577	0.411326083281529	0.439199636991758	0.0221292666964968	0.17723502980544	0.351879661126372	0.202312484629651	0.273096702132898	0.279161835998453	0.329544807898607	0.498100426836881	0.335165131119755	0.490310694249716	0.454515475752309	0.227522652450546	0.248318422549642	0.279419159481867	0.268360815158324	0.291247217349941	0.196899277392381
E5008_2_UC	0.566526146864551	0.353533509941454	0.336189720572413	0.562513309746871	0.347189769202683	0.429375463405074	0.30424173876786	0.309659229340332	0.228918631209298	0.140298755917124	0.111034091736096	0.148341097208293	0.0440018599948012	0.127315841197225	0.0141520579423015	0.527173650724657	0.363578517590206	0.411720234370253	0.34574906093786	0.414850573934623	0.562120661714026	0.529129837586402	0.505057120437931	0.497572681588155	0.315587881797627	0.468201915743926	0.393065486947594	0.417849881730151	0.429108372828301	0.36863773612029	0.369682379277149	0.366043948397051	0.0334969345072345	0.660366803593583	0.506977727966325	0.0809624076972158	0.0914811177621205	0.06960919581033	0.691295872511537	0.432249795833364	0.511949803374323	0.434281631840823	0.30964214726328	0.222123630380043	0.422627533044231	0.509880839143304	0.551999149149875	0.633381868418644	0.682202557215126
E5008_3_UC	0.399404673989036	0.170955690093548	0.245735711903967	0.600374007473677	0.0809555368257293	0.407031379285288	0.173539583400422	0.227044420887295	0.0140471351092976	-0.263727690933752	-0.0636290621262441	-0.110666603034836	-0.238308270383182	0.0184886408152699	-0.0645263398306398	0.439263869302111	0.221271419236777	0.263768155897912	0.286519902563932	0.346549954696092	0.33737030472025	0.309764046114258	0.180598411926566	0.247930370674485	-0.0094403046140805	0.271924907777936	0.23006541393013	0.316868690956551	0.302380264399348	0.036230517595375	0.0910375120186874	0.113246046704514	0.112809044625719	0.686031239547753	0.422268573931651	-0.157560145462898	-0.0352488316276413	-0.0772339991350721	0.646928439813773	0.290520222393296	0.445435322882236	0.317489609966486	0.0036110973963386	0.0227898536680966	0.462217715687351	0.482870312281458	0.559562653986099	0.602024996958561	0.797957053863665
E5008_4_UC	0.475069147483719	0.235923665671315	0.364509037238639	0.528450905478662	0.274716015866858	0.373958107460717	0.29639870893679	0.400275416145366	0.195417994459607	0.112137780920812	0.133908908496366	0.135541652324512	0.109529481075693	0.136426321162183	0.0318577750269164	0.456618297021497	0.269398631691325	0.268996805274192	0.290446998201242	0.426317912909067	0.548034170769751	0.535517673225192	0.456027702473334	0.453999052911428	0.383557871548568	0.402165140419983	0.416948872412844	0.438856805664159	0.43475989888631	0.354614713819127	0.324728783662422	0.338792883287492	0.0985748273325098	0.578015529432483	0.441586417266137	0.201819019705742	0.235347239525881	0.171576942680486	0.629292395718936	0.287722526841051	0.397211471482915	0.404786098626458	0.247634640424673	0.29167911294337	0.495162454774265	0.532735679274784	0.582339246504269	0.608129683524328	0.629661842446525
H4001_10_CD	0.472779318395094	0.389161020413566	0.417452429382437	0.471716908168502	0.272010376241414	0.358132294334926	0.328389264219082	0.365410913597496	0.312436493881482	0.264286612706256	0.326316197045441	0.309810658858422	0.286971598994957	0.336087277576569	0.326185770267241	0.574008551057801	0.367808199283505	0.3340857780628	0.422338659151029	0.397128254854277	0.410217778948902	0.29589672576786	0.267676589667413	0.38828718801666	0.291632123752084	0.217532182497201	0.232505923872972	0.181142766118302	0.236303336144913	0.379303528171731	0.308840709594788	0.323667112359355	0.176453240009444	0.427512768501715	0.391920396721672	0.149281553113613	0.19173577498413	0.16168601305426	0.589338874967918	0.40658005829701	0.538676817554252	0.35744096603706	0.395849502812097	0.364532303885622	0.514388812113211	0.529104782199461	0.538847169366627	0.542639548750859	0.5073315332666
H4001_4_CD	0.539910745533255	-0.0565462292296256	0.37010036401037	0.648798632309308	-0.237032336243798	-0.0602055967058965	-0.0103019823970817	0.120470873893065	0.180523803679645	-0.142997237749039	-0.214643691480445	-0.0229569855902188	-0.0828336736269518	0.0692553024146983	0.0338798026279012	0.581494463564036	-0.0389073866565568	0.10213984071637	-0.0871098207265359	-0.104851481648739	-0.0915245673092157	-0.0790514430494847	0.0380689121752459	-0.0743799305648924	-0.406008541871288	-0.184083822625843	-0.503336169236791	-0.346890936138405	-0.287396437112918	0.17116680383812	0.0347637868581638	0.0657694355010712	-0.00842225100916979	0.677648749240201	0.00775472251303676	-0.238250694022704	-0.140854701829743	0.0447311373400885	0.74116469214478	-0.0538870366585742	-0.0438604837055688	0.20563017868572	-0.00925652485296908	-0.438818027360877	0.0498126194562549	0.635230854499144	0.619235345959993	0.721238602487221	0.734465174620914
H4001_5_CD	0.093933357972576	0.318109701853168	0.257488688268043	0.332094787563365	0.159493803825998	0.274261887878115	0.414893857760307	0.382957961347652	0.292583719454657	0.294858353318431	0.348540182373298	0.27903359439508	0.325581324653232	0.420733167065554	0.300930800265383	0.366477841291988	0.200435208156923	0.293971397410342	0.241153832214474	0.250485906789777	0.385142474826317	0.326133054894982	0.356269755784363	0.396503171695931	0.354589817583051	0.289592487727418	0.281556002836289	0.261872293617575	0.370661798543355	0.30977088603548	0.333828274355038	0.371023254431577	0.115791256125893	0.267464212724166	0.316160916726812	0.186815593403073	0.205960087789484	0.246195605544327	0.29198687604213	0.248540462003236	0.415456872551884	0.353518338212844	0.302404003068562	0.280955609732051	0.420594880999721	0.292103585538672	0.283950186641136	0.204176364027519	0.363766345181451
H4001_6_CD	0.351353045542876	0.354173674372608	0.294112778600833	0.517510130872672	0.195681261356742	0.367338679828442	0.312937094044992	0.276063901223447	0.268028083049851	0.304835981271346	0.315879434656115	0.289040122108934	0.259768862628466	0.331688039355504	0.379068168686269	0.537717730383346	0.419029600891079	0.27882220876854	0.33763122725133	0.309867601356603	0.372330305925685	0.30775076416433	0.308959346990648	0.343997203516042	0.228537028534231	0.293010186536931	0.210430335731533	0.274223536486107	0.283316859199302	0.29620294936652	0.298770429903733	0.325465446392254	0.282106123652948	0.469902660919767	0.328237954934708	0.181140112250804	0.214999501925949	0.160354221003236	0.602124767965458	0.28315316955774	0.383014180190859	0.325832766963293	0.297699666092947	0.212892654465471	0.369602053787419	0.482166702935324	0.51977381892634	0.529701884744956	0.538817619701752
H4001_7_CD	0.430085950626487	0.251355934403645	0.304119908643133	0.57363608222769	0.120437289385352	0.358117683958301	0.205790943770731	0.2561296134676	0.113092710030436	0.0810157120663039	0.13864893768663	0.101025309970703	0.0117482034051285	0.149277786446475	0.143982167816449	0.461504587075792	0.438364579193993	0.310432843434851	0.304862463748659	0.339542722803454	0.280306463017311	0.415788178875758	0.161746239336195	0.307988248770077	0.0146570114781291	0.166244086559794	0.062443743545788	0.149844732790037	0.22889176240693	0.159723799284389	0.222386735583325	0.196033699951645	0.214932197958784	0.598087919150852	0.360377215884498	0.0142007597736805	0.143273320410914	0.0425963699249204	0.693334655512171	0.332216510100286	0.43157671251939	0.380801756560269	0.159782380064089	0.109953813851302	0.51553585832087	0.474020085666111	0.487136719887985	0.597662013803723	0.708867755935969
H4001_8_CD	0.393354559158233	0.208225277723029	0.261125351275732	0.560203581705278	0.0224810586395484	0.288659660369698	0.272903565337604	0.388178169506471	0.0972523481207419	0.016209085116222	-0.0035663079141178	0.0177837997142884	-0.103076751220535	0.0744741163400982	0.167783422439091	0.406822564635622	0.248935613243301	0.290269946255803	0.283481122823069	0.226699514853833	0.0710471341663873	0.134091916170239	0.0165197264192182	0.147447720490202	-0.0380940966526511	0.120189980697305	0.0336407545161519	0.0953834346425763	0.199260087859911	0.0598915898435835	0.0753709712470375	0.0579172027268448	0.0911813731985798	0.718646047939513	0.210413105828502	-0.213345509244938	0.00844785369776638	0.0191879770074821	0.63697782030755	0.136278470880987	0.418906069608942	0.305790905487219	-0.0930546642907948	-0.0736912897376916	0.439549038671801	0.474416550657668	0.527645522644493	0.576277451666955	0.788784634840575
H4001_9_CD	0.370970487921813	0.118848305916992	0.231732183832611	0.633682865452762	-0.228568017109368	0.324630615302223	0.246442122766116	0.345858333079578	0.207966082628388	-0.143735150979533	-0.048997174043546	0.0810336434436536	-0.161571023642569	0.192026512003674	0.0922074024244225	0.534666104949575	0.127793731940961	0.201716951242455	0.198134058406364	0.405402227284608	0.311176893638447	0.369950910720868	0.182393021792596	0.311349052818475	-0.129327150438261	0.0588592597725706	-0.0380663495699809	0.0648315443185479	0.0759788158873945	0.0845670292038953	0.124203957943541	0.162899970781489	0.236880771942599	0.731306302743444	0.347976086692255	-0.200115064758241	0.0180274567593697	0.0194719829299337	0.702615847684991	0.101194531890027	0.420273095774106	0.237255438723198	-0.164085472982404	-0.209816984045838	0.56378172829226	0.593125431254495	0.57534282796714	0.677317277784441	0.803891562563659
H4004_2_CD	0.298767381841058	0.249785812488685	0.218031901063632	0.405506427041671	0.317657596025146	0.213009684957788	0.187268907696883	0.307368659591354	0.313359304058908	0.302721077194593	0.217905371935704	0.364761649262651	0.261676748882029	0.427976624486265	0.306256357271052	0.400392153293948	0.342430268905495	0.299926087418721	0.334560988747742	0.296035057377592	0.325902957673714	0.258049300469909	0.360008382862231	0.299303004643685	0.361324612755891	0.27502517427029	0.211007149316828	0.235474878984427	0.201600171218581	0.190444569296326	0.181255248161861	0.137374411567087	0.204883163744956	0.294219565063682	0.233866846645343	0.27118073813489	0.19534302342395	0.155243331069996	0.153847203239914	0.183955839100688	0.217849567859903	0.169504360770613	0.180882135444928	0.154975987337008	0.29631772136031	0.247747118210104	0.287184392888907	0.271218947516733	0.313661485719225
H4004_3_CD	0.373740913419505	0.179839153273041	0.305653877513581	0.293315594498995	0.262881065091692	0.097370609918305	0.171378988144283	0.367954656096526	0.324210053977168	0.144716802959253	0.153074945537645	0.214752287140227	0.271780342141795	0.25488227229601	0.157607585096197	0.196261563193845	0.304860052343944	0.198729750645115	0.239105862814554	0.275387636846265	0.284669761543747	0.228131161565515	0.296488143303302	0.269091966407425	0.319875220825913	0.17604910015628	0.327581233376159	0.25459479774223	0.182144194222668	0.130740004169844	0.169673053703259	0.17323866092668	0.188137425383525	0.275254937758957	0.27701229648685	0.25875101116181	0.259478848369903	0.256910855916075	0.33461468446867	0.212961486442484	0.355859466320263	0.311426246447717	0.207606207347416	0.524954661699223	0.431299139008361	0.272773922851243	0.400445629658535	0.270574734558115	0.362368772760632
H4006_3_CD	0.407772495789656	0.381488342214848	0.110367120261877	0.271860380030222	0.503296086957947	0.474706047433033	0.2779534338071	0.261710672234289	0.211500438289503	0.382120218295684	0.299785857039833	0.3676191662569	0.295591421470736	0.169798954176198	0.253655318218122	0.361487552487552	0.44230955237791	0.445122073892043	0.420671272338063	0.375981004053111	0.181082157901272	0.25573815332417	0.170772679376295	0.154207348300785	0.220627074902882	0.320163399282018	0.463509142469227	0.430940596667711	0.279244901965689	0.347527692343031	0.327110172846496	0.341681887851027	-0.0518746734675227	0.110021659244407	0.468224429542773	0.163741978018922	0.170455825878547	0.31530729745777	0.303259938534512	0.403482126375184	0.460250865418172	0.447233544436948	0.474500962633954	0.435179346477967	0.487375658562968	0.413151756066467	0.449210819208714	0.478374924059118	0.325895117269405
H4006_4_CD	0.416233106666148	0.300161592248554	0.266257991484558	0.253659805078259	0.473123796856283	0.368718231345142	0.218434144627746	0.3027652040059	0.210396546073479	0.207298786470027	0.294492894296974	0.306971699443046	0.304718339088017	0.256571634599396	0.234427668309291	0.298648714245	0.306653511690148	0.417118528083912	0.349717642305826	0.278325315592831	0.111407170638592	0.212773798645596	0.194047452016497	0.175048717549271	0.282369043340522	0.274893470845475	0.49761250279711	0.403675884100071	0.256540570082572	0.373592712320862	0.293616172189332	0.355492754416903	-0.0845939216985425	-0.0427153341281676	0.398798312402516	0.249776647237803	0.251524812485305	0.257738725926053	0.361805141949873	0.435103342399707	0.488629055794892	0.457476386877501	0.425900608661746	0.598911618998207	0.460101622802421	0.37628332656535	0.436320809756538	0.455772601211229	0.354421335820735
H4006_5_CD	0.44922980542295	0.275344129582398	0.30974710736191	0.30077286519381	0.459481422973655	0.397700876996554	0.241504056301592	0.19773353099137	0.289922709581429	0.1903821471121	0.266159469854348	0.310154668510672	0.217327575232787	0.215892445148471	0.256753931003445	0.323866052858416	0.381758228741557	0.400428098929549	0.35393587999942	0.298978746029373	0.186357971931378	0.27727300414785	0.151062916508469	0.191800362706346	0.239203659861859	0.301269428637531	0.444028513830552	0.393288387453471	0.297155391688554	0.398558223652731	0.360484485349144	0.354442595250432	0.0763432886458117	0.118328830519449	0.376666192610831	0.227473219632249	0.226484295594888	0.317981235525813	0.422780311084492	0.424799980562895	0.411942453233604	0.502310594300597	0.383309210177496	0.460023261390775	0.415356868869496	0.320137030392019	0.435929490140554	0.475053308804084	0.421615200619169
H4008_1_non	0.367211488848304	0.0826809135849468	0.292435843549708	0.330085368578499	0.268971737145388	0.192395155344546	0.23945074885949	0.302892008473344	0.418746975289184	0.156056870047778	0.149236127468665	0.115797159307732	0.0831220691541788	0.166302352485228	0.126834824612616	0.395882137348888	0.280965500492438	0.372145238980375	0.279826619084406	0.263067056491193	0.336662517735431	0.302799770928371	0.328088943298271	0.374193424218608	0.247263385608099	0.26087731126722	0.324977344393495	0.349256225551254	0.290109604709995	0.339922675682852	0.281297713746299	0.281794970307281	0.0677122170896118	0.370535733330873	0.382258687622857	0.195262590654492	0.24562918039232	0.181476393213368	0.326385267288489	0.221777071764728	0.197488249894111	0.242248713501451	0.249131190902141	0.229616368689122	0.19097212982984	0.392923839302158	0.413949636040461	0.423984190638117	0.272499962502277
H4008_10_non	0.293639696783094	0.298394522261102	0.200759813255108	0.262836288266176	0.33124240181697	0.421180799974862	0.272866874285864	0.301962592921572	0.253277531747302	0.348583470016934	0.398705871596825	0.273060597429469	0.287998567213929	0.222675664417561	0.238762883543323	0.325284107524644	0.390486315212129	0.340778661748312	0.400494589719241	0.307938163315722	0.360295551490966	0.336412156862279	0.352651264283088	0.389807663425556	0.357880232539201	0.41812626319099	0.376620909239042	0.362019980444151	0.364306912699182	0.38065279983697	0.387825371807663	0.349274093354422	0.22561146794527	0.256584253755561	0.453068797280947	0.289950428319047	0.28765559894685	0.327726421776889	0.461209296935143	0.34673059719066	0.446851794734227	0.392374630576826	0.444584473669822	0.345990743671768	0.442493329677937	0.348894240069965	0.335716643975422	0.437349512429723	0.395851414632363
H4008_11_non	0.414221267781174	0.248966472287569	0.334396205376093	0.27078833240565	0.434017444423028	0.319489260284631	0.309785092509301	0.302115318488337	0.392265272301415	0.297563936664222	0.321985670201603	0.213694152291778	0.253835057425411	0.136890643861137	0.161731830965885	0.249598703331571	0.455481734241549	0.40470594334237	0.465002151586474	0.372907564376652	0.428619509751437	0.346856651654325	0.410388574564381	0.413584546391976	0.509829758312253	0.476529546267979	0.378977094719079	0.392426829867324	0.387877932310158	0.355252132411197	0.378746459014143	0.321630609081052	0.122415749668922	0.196666797738753	0.461545179397756	0.283232643593335	0.327041017910727	0.291086909990854	0.453512329491009	0.382459334042832	0.383458476058054	0.382251789257918	0.410587171452289	0.369776642789918	0.478906824576609	0.361219509125047	0.394922346210621	0.412141547424382	0.44839104139298
H4008_13_non	0.389517754669767	0.238559758524486	0.246604975218142	0.322280401016085	0.361982119459788	0.433892865232964	0.215238259231322	0.301063316951492	0.168181699570896	0.287810397887519	0.213456174180792	0.319605475108193	0.234137282936986	0.102250668025937	0.105653404527296	0.237933787911535	0.296816548362154	0.416526017859052	0.400303411831413	0.3704039336335	0.32998045642122	0.338240029399812	0.295136957984426	0.275660976354554	0.252763457794696	0.402676687744322	0.426443782716048	0.344770570146219	0.337017593101638	0.414024599516793	0.43790408494763	0.423837886453859	0.145680947420294	0.175494717918371	0.507749665559475	0.276013384829984	0.250190202927767	0.314320311324036	0.51197793016063	0.463007539566961	0.418708565991357	0.456279979473218	0.515789550056942	0.416858090208407	0.448564573081322	0.512902656596067	0.4764456957221	0.557511258843501	0.495127212590333
H4008_15_non	0.0474499592932407	0.265956591610991	0.0634422721611156	0.189720107833904	0.3489983993836	0.325625985639471	0.222086775792016	0.225341397640553	0.298912827841278	0.412720740610819	0.396772980461974	0.3508046285447	0.293753605429668	0.273267349494318	0.279307144288588	0.261512777352818	0.354935892344317	0.372442980589643	0.321214904377514	0.18471598897755	0.377560804605147	0.316895469450829	0.342685029379621	0.356469572140192	0.318023422689066	0.299590799257295	0.352427269038386	0.364914089111193	0.396095644757039	0.32720291710443	0.344913824153035	0.291349474904845	0.222689655608939	0.172988769690145	0.404340520478418	0.236619982986638	0.265943862908079	0.255506712626916	0.151680942547063	0.232433728345444	0.199079275633724	0.189808377613037	0.282087417473195	0.194841950135764	0.200537570417073	0.223533664583032	0.192646468050175	0.172444789678281	0.0875580301034256
H4008_17_non	0.320079419325161	0.336229413711137	0.210364074119657	0.295457830494994	0.328217262320692	0.455500077977033	0.33946192188643	0.332846501652108	0.198623514120077	0.339703576383398	0.283865670820637	0.25925012691418	0.259283085082097	0.252800470537023	0.218242711871337	0.269836248891405	0.488522328676351	0.438718020825908	0.493897169203114	0.450162537022444	0.398951188879938	0.447513346666983	0.371753787166226	0.406529726596013	0.338887024774286	0.510837967064996	0.507207385580548	0.441883426190696	0.451312617114742	0.502561227382303	0.460764672431374	0.473779480679024	0.231902066788847	0.169735325014233	0.473543402099444	0.379349724986316	0.314598574266822	0.381021676370627	0.478061173590937	0.373460528806872	0.427463466288339	0.437079461409465	0.466949012899939	0.365926875303147	0.453432267162008	0.406364601911235	0.386161478101873	0.377372190413296	0.413638449267167
H4008_19_non	0.330161013937857	0.271764716411281	0.152084044585519	0.238452241027313	0.223556230696143	0.311806835795089	0.230470181256009	0.23523971295722	0.146264156323415	0.213844996045428	0.212900748099022	0.199890103401117	0.17415860787748	0.175312812928573	0.0795240757059258	0.206528610886289	0.394291293888216	0.341990432707184	0.468142512957015	0.37186671951184	0.44939609124215	0.402867757541462	0.492783126206054	0.451028316460017	0.50026104682505	0.459945834415426	0.480149621092649	0.489249213762513	0.491867620863096	0.497471361253069	0.420041432424403	0.401773812312421	0.274733450237841	0.26715107914663	0.548054427611092	0.328793441822603	0.257103104090365	0.223906859998714	0.465576862137711	0.344113753604348	0.388978741561089	0.322978500048412	0.400709457016501	0.274030685667977	0.413415450465822	0.298066448527565	0.359001774202173	0.36146982525705	0.413384012737278
H4008_2_non	0.395225206719814	0.312528394542932	0.22633696419749	0.315952517440393	0.347075391119349	0.390839046350021	0.300571260512858	0.322143465439887	0.279750566500128	0.231183860970007	0.198182140485074	0.186782574053604	0.22632157047295	0.234455768408209	0.15227840896868	0.255217772167182	0.419170978429718	0.397040293280563	0.456778379748773	0.456119728951549	0.355146321762274	0.378618971256477	0.337693774790803	0.399485403346328	0.285015439953971	0.495443239368974	0.432046557714425	0.421098378741027	0.455741490699697	0.418596593013395	0.432540079234917	0.432291866400341	0.11049067183109	0.332558631881897	0.478657589727015	0.346014457774696	0.29024787265845	0.300147666897484	0.485730879826854	0.414076499061345	0.499408341627679	0.421069109286609	0.463794638431884	0.407331001066559	0.529647991417982	0.40812440294568	0.36293262541342	0.432038562739204	0.487291757844899
H4008_21_non	0.110299464828806	0.242369114050252	0.119614408083594	0.1508501990176	0.107183737853869	0.240096928573314	0.241289139486983	0.182129442662756	0.117906808442647	0.214177592399401	0.153527368733864	0.109788931524424	0.130471120019214	0.104543442169509	0.0306817616258965	0.151721496869891	0.380723164635962	0.247771344473785	0.29541091170828	0.108805988473864	0.296017433232201	0.315322868835823	0.263389613504671	0.297506061563308	0.314259857524098	0.435083495353	0.35643970392239	0.373183201975915	0.366608112002438	0.41062505389965	0.315213091953842	0.369026055056923	0.108722999096827	0.153002618665113	0.318214539422216	0.245884719304828	0.192729011035863	0.261477379418378	0.279111756274318	0.223319426939252	0.311098615773564	0.207072165972411	0.330150975483607	0.185822696898993	0.25958175521937	0.247789720217994	0.212588390281339	0.239779354033772	0.179730772811604
H4008_22_non	0.324709515731559	0.156292733353792	0.199202277741166	0.235375832381713	0.28871970337525	0.340277873230826	0.160818543463279	0.273115773076949	0.192349990028271	0.169025870828886	0.122242237518185	0.0485167567582116	0.154977844910315	-0.0168223165286521	0.0529253646576305	0.0945357784650726	0.388943285912193	0.487384924749275	0.445671708264782	0.41810881278477	0.275029537385808	0.301120904229312	0.304623360456165	0.292601296194936	0.337897237055514	0.427567578156439	0.449694539111235	0.352930068738715	0.347238833193421	0.526114938517173	0.461964028269385	0.468677957992192	-0.00405541149289589	0.256034847086098	0.424692676558695	0.268933737992675	0.198006515578977	0.166473778523614	0.462439192004926	0.416627887198629	0.391909563145881	0.441816243867114	0.460347845074541	0.298357151058763	0.425200676674032	0.502426574572155	0.421520314186475	0.523357237021282	0.39916253967767
H4008_3_non	0.330990790721572	0.168219197918475	0.167566022929075	0.235100939535143	0.274190187609386	0.253858819803319	0.194556652536893	0.228104340692573	0.170056643219389	0.106096658107509	0.186839430025373	0.153492877904445	0.15952777951459	0.0959615739642404	-0.00641131827062794	0.189225471789953	0.330621001275868	0.395939791032049	0.369973993448881	0.309240565746789	0.301287579171908	0.317365297030907	0.401786712233786	0.294547663376527	0.287848937919959	0.309447730556513	0.494960504131791	0.38080219936552	0.318857249081712	0.444454465520757	0.391642311408807	0.438889711057897	0.256301614366405	0.249330509098098	0.482689251116193	0.228884800698669	0.203442089259973	0.250231667675256	0.433190063871434	0.433316234511052	0.466514297271254	0.488497816828199	0.503144022011216	0.446956292874457	0.469526067732287	0.406857504339802	0.507852971992227	0.517438646251463	0.49326212737415
H4008_4_non	0.363301785453737	0.231034745962053	0.207997711360894	0.249341572560455	0.339708763817289	0.371211162269386	0.254849206237115	0.242180763177029	0.199557066501362	0.165286412955069	0.186786558664368	0.220387227875963	0.175963554924329	0.143324441670436	0.0741095525984208	0.171922699333983	0.328001013507761	0.409656283522633	0.364502242271147	0.374617313855414	0.322185091019418	0.336675846450062	0.312978092422965	0.29740329649834	0.283132799570526	0.391588312818923	0.401586311320592	0.357662110477882	0.340183334305659	0.407668726904564	0.398942522345762	0.429151507802832	-0.046101404640462	0.205299745831246	0.437081926296218	0.264579432179473	0.245795610277305	0.298125038489828	0.481699937527845	0.458306421269193	0.473650266990134	0.506884677523724	0.473491345006013	0.363129527818455	0.498251923398287	0.449247515695292	0.460186699485786	0.506895034736913	0.448569008271691
H4008_5_non	0.353687533040385	0.2188343466987	0.216564011239437	0.213500480478171	0.282112573858435	0.33962594872682	0.142330209662404	0.200223187584855	0.170336814625801	0.253281058504813	0.176397823042648	0.192093860045357	0.173558890078894	0.247236385793709	0.107976448039539	0.290390534395383	0.385961730073299	0.474715304464264	0.456790834800842	0.344472180607177	0.208308662520409	0.303696614519241	0.225220826397676	0.289176563682182	0.232935008776806	0.452946905600807	0.448663451432802	0.375106836832738	0.384320866394025	0.463669377682335	0.423112153782918	0.478326455367991	-0.0140614345792391	0.273764119317255	0.453386341876668	0.282707118429647	0.286468443078778	0.330919519466102	0.507615446512822	0.48635301483018	0.459881066622824	0.471069592506179	0.491840948948084	0.351339833097733	0.379233238101216	0.407317803429023	0.413407780575584	0.49074541382515	0.388875094147227
H4008_6_non	0.39530492908014	0.176470345189582	0.318560211912071	0.196834749701878	0.342078755905587	0.366653187516107	0.117857938807929	0.169940765970307	0.209125690179421	0.243089289436284	0.2641389954181	0.147222390290308	0.228974244487605	0.0355338011923834	0.0571139612212232	0.106831613917266	0.306227988876904	0.42299975046864	0.415893810543978	0.281548840060378	0.136342004936443	0.287587799518144	0.165229612927075	0.186610979987585	0.264970519611081	0.348994113969666	0.360524837386186	0.287386244908154	0.265120507908359	0.359353023054444	0.328347377293683	0.376047896559609	0.104928897154909	0.258460122140769	0.427921488714691	0.215093298195903	0.150243753650375	0.274399017407166	0.455707399981117	0.406465155137479	0.386932086284179	0.419913416414843	0.474438273416794	0.320633547736995	0.390170330014797	0.368811557277142	0.325803883224078	0.433599129564361	0.397411978494581
H4008_7_non	0.454250718474099	0.191288428245369	0.316262789691542	0.232110723474515	0.394988548378826	0.403812997429999	0.238045775442076	0.283004612388949	0.279177531886273	0.135409724957935	0.140346018840587	0.208941940614819	0.177175108135551	0.143207265168641	0.0328765962682235	0.151094433375941	0.371440302537814	0.416813247408165	0.428498330548326	0.372757369226468	0.303948049786331	0.369480214455615	0.25411258996926	0.296092583043953	0.30839185926444	0.467858805510328	0.429280940851178	0.387665336855666	0.327371290172238	0.410045200446384	0.414521094868576	0.435321911189289	-0.0189284881255135	0.194183367908685	0.438169039912916	0.30024095702438	0.239110785442244	0.307223986345145	0.467204719048827	0.394859462876236	0.419232634112639	0.432073462820895	0.430848679068874	0.42260050995975	0.465250768696856	0.448113149235743	0.451543820913754	0.493949749202855	0.510612546907452
H4008_8_non	0.474585279453233	0.377710413274777	0.349147929625279	0.307418247392249	0.295297894530132	0.433874071430304	0.285641980778664	0.239233488666633	0.274101507491784	0.322856154715945	0.31405805167531	0.232986706643538	0.141050981117657	0.24985056642411	0.147435915363231	0.156767831473855	0.375044866609489	0.378030948156093	0.383282694812321	0.339937601646034	0.175979685583471	0.383601897056972	0.168303964404377	0.243437247968182	0.27658708716072	0.38111869876752	0.354734799229826	0.347868466139878	0.283206036097563	0.374052355043882	0.433462478752059	0.412809240686015	0.236151407602223	0.342883540120853	0.330669393326861	0.302213614220612	0.235124062659316	0.365187109792085	0.50229036539187	0.401725171675766	0.406245788986428	0.412363009191034	0.391636151053825	0.313770995820349	0.435598892824247	0.492740146485156	0.371105694694004	0.462250867682121	0.448412791255601
H4008_9_non	0.335684531338487	0.201689709110097	0.252791263822975	0.136660472981501	0.257678761874634	0.332219504417569	0.242233000722612	0.29956066184184	0.194340341575272	0.219421288991895	0.2142443164716	0.125617874449872	0.228294268048878	0.11568730352172	0.185268730780474	0.201428537165674	0.3605421236709	0.341530224459581	0.397556205314767	0.278790519449412	0.421067244361317	0.362510304185969	0.351059143533898	0.369786085315088	0.342045540793058	0.413460340412809	0.440575441153333	0.421774660680094	0.428018031720533	0.417102307699652	0.36103363566191	0.368720298211969	0.107720780019407	0.0874675241951455	0.436750793557777	0.28171886726168	0.261048645866147	0.258695055934494	0.450990532085458	0.368312018635906	0.413095732336546	0.311094539292964	0.416028899815038	0.331887207787684	0.327011984627564	0.343560792153068	0.298179734436959	0.347307768434036	0.316005449852865
H4009_1_non	0.386964182589672	0.384208786216649	0.271528649134483	0.289363024461318	0.338388450149396	0.398225663250062	0.358475005490755	0.316876668367053	0.349907216881184	0.423291270803104	0.322995541093141	0.327625861483841	0.379386576865807	0.294148546434268	0.316274740815476	0.409307411620469	0.416741921358919	0.440962920724137	0.37566699386566	0.393901762288188	0.325057040533718	0.326782498935309	0.340802824512223	0.350357498130185	0.313430046895566	0.387514245419861	0.407810752877164	0.347729934695598	0.328457479735027	0.439429101878228	0.460405409912061	0.442984016737991	0.190541670735961	0.163542747267826	0.427468284518562	0.374448971007208	0.356435141643751	0.391396713132395	0.542825998376819	0.456510993643075	0.447396860358792	0.480634364814639	0.434907876853784	0.380877276888963	0.420525268164447	0.388552099491336	0.35308594596862	0.451967223767987	0.372255390300933
H4009_10_non	0.342874851646656	0.332505269473837	0.294297649003822	0.228799448998364	0.341848838240228	0.420433116590462	0.306658601866099	0.244300565747319	0.281294518020438	0.350533041979341	0.295069527991913	0.179071022141257	0.227759188819639	0.22133557714137	0.258142813227263	0.272795994806904	0.529817226798327	0.401638570470194	0.443250118160781	0.406705156765385	0.379543925521026	0.341621679531688	0.320088482637272	0.323348692733417	0.346654359510747	0.432122346084467	0.363453292628025	0.359049414078192	0.38836957567566	0.375908059189097	0.385557872581679	0.365659107236161	0.383002544154123	0.260024074687895	0.368716001184278	0.236958171450434	0.253038819274424	0.238178242933059	0.424374121821677	0.353139751549191	0.374481007898768	0.355670027382427	0.376856618658481	0.340886154830148	0.361516148096949	0.291259937712644	0.288375556943963	0.351812023557282	0.376299124345633
H4009_11_non	0.313091306924659	0.331994314059848	0.187414590198045	0.215042307824449	0.275180204257634	0.424910218531269	0.283191614385774	0.256928343935191	0.118137733482116	0.407686922789923	0.315207009622267	0.317232470446475	0.307989760254228	0.27884318495496	0.228825902598243	0.25357979970785	0.451655682700502	0.482383851550189	0.391407519648814	0.380496838093293	0.311138568658521	0.345681154690388	0.267184121582502	0.309724570451089	0.206421254369146	0.424943433934624	0.397295349276404	0.345490016847211	0.36489486476839	0.389053325189797	0.469285739506867	0.388364314512678	0.0888948034140543	0.223644260827718	0.378099054788282	0.250181822476576	0.167126559732769	0.354175249368136	0.467651709475848	0.42438439077905	0.440282461456835	0.428255924016581	0.41164295472842	0.312502283035635	0.392808812428483	0.341060868942544	0.244665609101105	0.383496059553919	0.370998118512209
H4009_13_non	0.304270213436626	0.362549260878276	0.170596155902152	0.189412736822298	0.317575280045147	0.383648246416037	0.255090959037271	0.260985013387288	0.177078686808766	0.363103803782311	0.241726887855352	0.2142690048598	0.148546660719277	0.197581221869442	0.226105427781398	0.19602501916382	0.472961473050246	0.364449106941227	0.444989853241361	0.40635907467113	0.302659215390924	0.281562790516494	0.216449770079714	0.320528539632437	0.234153390222708	0.406192475934048	0.356395031655797	0.367370223222164	0.355770494026185	0.366581733705335	0.333974202426936	0.305516944119968	0.22775996443558	0.101750674096717	0.424461271727978	0.242399393406419	0.203895543659494	0.215086547123106	0.414240998896592	0.3402673243208	0.384348543120649	0.360814956888403	0.397114570242186	0.375216257737884	0.466397102879679	0.321560959973726	0.292990880498398	0.359288479673727	0.390328129388491
H4009_16_non	0.384346017475191	0.213293659329124	0.296649504829423	0.177428528621088	0.307826093261616	0.395089137365688	0.291534539514593	0.234132022101582	0.247733310396748	0.386865906066755	0.327991712299536	0.257067307293633	0.230439809235209	0.178258295591074	0.187758149743141	0.210687221026798	0.340520985132224	0.338678395771493	0.343176161107776	0.327543868966579	0.267192786557457	0.383134998351031	0.185380407183486	0.278279766939468	0.30122641190994	0.32213881011112	0.336892351853374	0.340257634443368	0.201511166230868	0.357050634843942	0.394238193088114	0.354562519728442	0.0559177820317446	0.133340630404172	0.375428262153092	0.306787997009609	0.180326465613582	0.254571150796045	0.345147359189512	0.368470774521888	0.312459479989372	0.36611597480244	0.379845073407413	0.344915041660289	0.474150539038849	0.343971657515279	0.357367015272629	0.35087104878082	0.385996243724123
H4009_18_non	0.208531184820223	0.409423012235462	-0.0263986061302084	0.249371062791126	0.361998765409274	0.537917690350142	0.2690908906795	0.118072940408336	0.113419417111962	0.109689265143883	0.035401672337535	0.175115451958747	0.0195478872781527	0.158283878403145	0.103926103662858	0.12331736201946	0.367837067835941	0.493169420669393	0.413284094208703	0.459795305457039	0.233070987779808	0.265005531569843	-0.0289244693946597	0.150841428603974	0.25487124015793	0.214165643841086	0.349104572170322	0.287211757890913	0.335020093820877	0.325147961282719	0.334372368939678	0.403171463136156	0.267266592917339	0.26896919274253	0.432305289143766	0.0259728150851355	-0.0659647554363365	-0.0399861226982233	0.258416021092522	0.142721321635259	0.258701554026478	0.444725352702509	0.235280436612862	0.264552572495284	0.509502322011924	0.443046874429639	0.377749957822195	0.466609100472278	0.460493974600201
H4009_2_non	0.263135955072587	0.292661110536861	0.160397839416541	0.173014504669558	0.295856840706268	0.386914337693589	0.280835314132622	0.224536556185956	0.0700643924477486	0.278853476790104	0.261370348871515	0.217486147439719	0.160882885584207	0.258336701097302	0.208824475844008	0.130009717118135	0.257036826429439	0.295068043928199	0.31681737731004	0.383350858442458	0.268707309371319	0.28586470402607	0.189176643462678	0.238026572401575	0.206827113447983	0.269345604170367	0.289174549655001	0.289342573853421	0.276988258282314	0.278303877924015	0.330212807129535	0.304635629398592	0.264185983988113	0.0285191714819918	0.379926566636068	0.0867677275326372	0.0862441587013704	0.0976652572351798	0.388557495242492	0.295481441804846	0.43971206362753	0.318277429926155	0.294805403556623	0.384902090832125	0.456445769618507	0.269256560092202	0.223661448808787	0.18261689124641	0.257242037707999
H4009_20_non	0.344504502930627	0.461976663502757	0.291560281496668	0.397807341533571	0.39841563980294	0.401480851527919	0.345104699921822	0.451068108994613	0.316477353161823	0.364560863092431	0.308819767803966	0.358797655449212	0.387814153566959	0.38201717709979	0.395510074227721	0.383469489663192	0.456239426109442	0.355359331689663	0.353927590209274	0.41226444270441	0.355707466525269	0.310329165449856	0.401536746355668	0.46103758576605	0.396356982680536	0.361164922608655	0.314066856493372	0.357445591442756	0.397800960150403	0.313548769163986	0.34394715512729	0.27564717732846	0.155567517435444	0.114351798676203	0.337746285257326	0.231473361364796	0.227717063732182	0.270228878661508	0.381190787625416	0.319717067412975	0.380660150915244	0.244305866826048	0.29090967274205	0.263381664807578	0.372043604982401	0.329001071847723	0.296696903215371	0.257135919355007	0.362964914724853
H4009_22_non	0.462498373499616	0.103266692058734	0.289561584205067	0.232682138264631	0.371833454900776	0.38360349313907	0.204403483644881	0.227724884972725	0.195678308169371	0.153180485574918	0.0459672450169434	0.0612763594764232	0.193451002579341	0.0602275653229103	-0.120471041475176	0.0273984188186122	0.321938235154858	0.35641267499148	0.368018160901084	0.375290760540625	0.36201484217402	0.284677585217216	0.234695483745019	0.155315301557487	0.35289217908402	0.329478476325873	0.346293897330939	0.390566569599285	0.273577337877196	0.351757281641796	0.403012029153048	0.362269204108478	-0.00618060256722416	0.0831355517087331	0.496105348532966	0.23530080874941	0.156364070079011	0.124295026469225	0.436341897754611	0.329604403047685	0.350263050259747	0.342753773897623	0.360610418020776	0.515518657712134	0.54284553092458	0.45705478018224	0.488653745660032	0.486690742459429	0.563512164031017
H4009_3_non	0.427392743809261	0.404199840708351	0.343293338248956	0.382278705023408	0.39928821486665	0.463441886062438	0.400471696459316	0.39253230721937	0.330192277570808	0.39018345632081	0.309141157202471	0.347094466394984	0.390517078489294	0.35463847626502	0.360737844986447	0.327563444957219	0.486460515045553	0.476586371904029	0.408349365139759	0.448620952605191	0.404418340578834	0.29859645205846	0.369700878800948	0.444593075254954	0.432764087537484	0.474491914289425	0.414045680516845	0.394671906433134	0.448956250322002	0.408114941733672	0.402846873872898	0.341802346278335	0.155882674866171	0.154482568667783	0.458538415234432	0.322487844213474	0.380761685728295	0.377296782094013	0.514647151159976	0.461271735082383	0.450313975102896	0.388350959581308	0.425213973864711	0.387287508906817	0.500342645379253	0.410418651323567	0.399837424121958	0.401964899514637	0.501380152078597
H4009_4_non	0.276230408800669	0.11783098238381	0.207356526611665	0.186421174210643	0.325977030710278	0.368776565196074	0.205077651256921	0.265948815045565	0.0585794849424531	0.155809590929093	0.144588102707887	0.129894677632741	0.198336733670482	0.138051066871258	0.00307278366216909	0.0966150437245439	0.28942278831083	0.374080614703652	0.297364309009696	0.393741360637883	0.140226122219866	0.212612927632758	0.154483130081851	0.160222190437942	0.236440425402609	0.265032223944037	0.239776020459168	0.181996944552138	0.19221221474118	0.285315865998957	0.33187539265345	0.291980743772574	0.026828810093297	0.0505405510256681	0.352057306275795	0.0485749456259556	0.0373616103399351	0.0669015329001841	0.383674987255512	0.346287094025509	0.34126485659427	0.361507443745058	0.374075241980903	0.368968780803541	0.458979293795528	0.371262757586083	0.306635032544166	0.434010099286846	0.399010888071097
H4009_5_non	0.269699934009713	0.312515314937118	0.270702140514457	0.242805587779658	0.245402715134212	0.37889370054018	0.320116891267818	0.301770945457616	0.210385312149315	0.39051877392326	0.241595634248691	0.248862168573441	0.264552176183095	0.23930186408253	0.249858428267955	0.249262996122865	0.409431847387772	0.437326891578662	0.368239543849381	0.395949874693117	0.301306707824724	0.278023555541713	0.312432789068912	0.284560351494329	0.281346025205712	0.434310757988207	0.335231947648421	0.335196911722732	0.342336559161647	0.358067338366193	0.39541272249924	0.347834171282557	0.280714877240936	0.052419812457656	0.343825234321918	0.165190065090889	0.215192100886669	0.242199662845975	0.448032305129492	0.356843195861521	0.396943370498171	0.379364144690997	0.390387293761432	0.313423871102212	0.492602944149615	0.340391880509139	0.30693554611309	0.389261453823511	0.304093360563855
H4009_6_non	0.218109253459034	0.183784308839894	-0.0135196613487063	0.173993390585773	0.249633931626718	0.394607448628909	0.16938481848989	0.0447372402948867	0.0480885789587489	0.215049636336204	0.180312224552811	0.152484563335735	0.135828003797558	0.175894557685096	0.113802307032271	0.141717795771296	0.301898494558704	0.37874286958585	0.270862078239357	0.328364260306679	0.0773216288005664	0.148355955582753	0.0670002844007235	0.109044522728642	0.0567191107281197	0.248300963477072	0.273063334605523	0.177269848994024	0.192206185286827	0.260657656722587	0.281620108974413	0.276292184972977	0.016087225745802	0.0726364124622927	0.331985300228139	0.0820722935699326	0.0342907284676397	0.181233490668636	0.357184655617155	0.350207146329135	0.375362878552193	0.31301147019685	0.357168439875763	0.171710035955978	0.361319069775714	0.371315490744991	0.299968628807602	0.38367802824096	0.334248360400963
H4009_8_non	0.311407785733779	0.309890725540034	0.248080484201397	0.25249814774217	0.320591292433786	0.334370538876601	0.274381136247401	0.211256915089334	0.217725937260796	0.276233071303006	0.232882576148362	0.321467969654812	0.2450347493824	0.265929912915328	0.200683630045376	0.192055544507594	0.350539404778278	0.356536133422989	0.338626108175658	0.372117767457273	0.336227612513927	0.299144348719759	0.19129168187486	0.229896095271115	0.307157752729034	0.315701463777799	0.390640119499943	0.357640654843145	0.352150922965168	0.26174887821158	0.366375826882663	0.309892659904234	0.097692006401871	0.146378757348928	0.429261067102472	0.114049212567995	0.129657230950014	0.220641234155296	0.296765685109895	0.321390895076726	0.408829962791044	0.385474110311239	0.348872437502326	0.409153234133429	0.342513221772156	0.335495705147315	0.337322685655474	0.203517157493094	0.353186966648394
H4009_9_non	0.403963811533055	0.287711496391153	0.176199754983221	0.305380634004643	0.355132257980777	0.434837754726692	0.257083185293123	0.308123352111726	0.0464065456209594	0.207468798409551	0.21547899276882	0.208664186940028	0.231445540227707	0.25624199545185	0.282015995748683	0.190048516685366	0.38239790297938	0.359706504047295	0.31953262811585	0.48640163147732	0.224105623352476	0.290872297298088	0.253584346275321	0.264224791655572	0.255946966316435	0.396591276544237	0.397172256708654	0.36010378552603	0.374001539419133	0.355354478831756	0.43477067717318	0.360667529493672	0.0401875132201106	0.176192296031069	0.337665138375582	0.162430992491937	0.161907553105873	0.125401987052256	0.347384639682957	0.309068284722826	0.37455400388439	0.316159337966895	0.362885699116313	0.365020981145015	0.535052992995429	0.35406759990802	0.289189224715887	0.314246067698235	0.331408939411866
H4010_1_UC	0.406932248836124	0.224572568704404	0.327560597061147	0.295766788463345	0.31965092124089	0.390222807349044	0.263517602759548	0.330361735629835	0.286878098960994	0.256309593766874	0.18866443923363	0.28859834750365	0.272349796882588	0.290202392202849	0.177662453238958	0.300808345484738	0.476464040702072	0.461700268209822	0.482449690284024	0.469692907869513	0.370851862795041	0.370629088729953	0.37896852601109	0.354635380782011	0.341753335529075	0.406864141770097	0.452541943842834	0.401317644850107	0.389217571435707	0.475263397958658	0.465496460964526	0.486424079453553	0.241247658707672	0.321726930899033	0.486850618201428	0.257992361842531	0.196014922838069	0.288932977629727	0.412820162221468	0.518398926781632	0.436230294865223	0.495683249528772	0.466055899330914	0.334509184752989	0.424419026164114	0.407384729464442	0.383082408132117	0.44313483163823	0.330106533858473
H4010_2_UC	0.297320514567581	0.225435460166672	0.134346346677561	0.617534898640188	0.0449471818060438	0.483378534191899	0.231927700524059	0.392828903740605	0.0175574060017393	-0.0939494198929104	-0.0108803120927316	0.128404743587551	-0.0225202711135619	0.231402287668328	0.178511513744115	0.567220411863635	0.354947658728	0.214912045992195	0.335443234007324	0.384510346702713	0.251215779046968	0.354636062890498	0.100024216413683	0.265693498388265	-0.0139686678778505	0.100001938355538	-0.0346483164801921	0.0648607226582332	0.165988942276317	0.030960580587939	0.0854045817421713	0.114856042130888	-0.013056502006661	0.761724183540717	0.511249026313955	-0.111589471293473	0.00380392594971661	0.0015802834851584	0.679364040531381	0.291794346205897	0.447930794926691	0.217262400950377	0.0213010297715761	0.00687711952898561	0.665663454659052	0.460975890023254	0.447795628446347	0.53590224856897	0.816233804238127
H4010_3_UC	0.567080929534297	0.198925492146288	0.450523472069559	0.67468758546542	0.172449557181787	0.396207475184226	0.197987644946265	0.176458246931114	0.358010022943155	-0.025920895966311	0.187551927679626	0.0424257372347205	0.0938633190966294	0.49278257010876	0.11213827208554	0.620552544822744	0.473468782870296	0.107211468564258	0.243610397447938	0.400143035772363	0.118076936827621	0.309833840686273	-0.226366252161056	0.167558580064929	0.0209322225715967	0.101108143333579	0.0457715669843659	-0.0143801430102461	0.121276899363637	0.27910889423735	0.183157955217908	0.267083601945505	0.296944974881705	0.690923813592658	0.416574982728141	0.119300477119545	-0.242825628952529	0.335596189838676	0.711091825064907	0.158932090706445	0.447373296202256	0.173632655222272	0.118985617746868	0.0783111058940292	0.636309207156036	0.588798536916516	0.575987423262562	0.62332517867178	0.688871344930351
H4010_4_UC	0.291010771472647	0.298669355131732	0.201672749024239	0.147968942748717	0.304000626810482	0.357743963697316	0.217825787431621	0.236720264868503	0.195204320721494	0.305201592987588	0.283159109532602	0.280036449110241	0.250495742914965	0.291232592777204	0.211044051222662	0.251229460762886	0.520313144085105	0.522519636891603	0.542785827694001	0.570786086769798	0.391295129664617	0.37678735848334	0.369191167881651	0.409581292152696	0.377619273769032	0.426284114564778	0.49470021226322	0.415415406815217	0.411867014955777	0.509715988725782	0.519485927540672	0.481116623471826	0.0615980962584918	0.155986758084551	0.40512699302229	0.287727901272833	0.279627070705345	0.431231325077926	0.358681134353492	0.508079736343093	0.465235078079272	0.499783282076534	0.473063128928942	0.269501983360712	0.424727306727485	0.298922928980668	0.259675128627064	0.384997684943949	0.173913323071567
M2008_10_CD	0.465817019015651	0.40529241066309	0.274416380342631	0.510632500998101	0.45081506520573	0.476372243424463	0.32976154202228	0.353283637643531	0.351049190830284	0.310965312528465	0.314543323399353	0.339338867146454	0.267597640988253	0.312562169918047	0.282661426239665	0.513232233751409	0.446218522481288	0.50366995643154	0.448705055384619	0.446876889851571	0.533347162660741	0.395889448138287	0.446850583421138	0.493930162409402	0.41607663375006	0.444236509611357	0.457921748863796	0.393737202808996	0.450528154427704	0.437294924121479	0.420779835009471	0.376099639790765	0.279129602738959	0.406695083050984	0.520694751709676	0.205152075828193	0.231401473535338	0.272769999070883	0.591113778957014	0.385505543548069	0.408953670369462	0.375886889412514	0.319145750414809	0.280806334371919	0.386947772076336	0.577802544268992	0.539106485356998	0.589241692964123	0.500006886982448
M2008_11_CD	0.456682274401958	0.483522505979974	0.316122251771229	0.442367063650808	0.331261782236763	0.455783646248237	0.363144537707684	0.411544571275172	0.348215633919917	0.313111936672411	0.292366127921449	0.358062126165127	0.3081568803219	0.379422072747814	0.331955765753073	0.48628902431166	0.416292373223556	0.472602584782904	0.409143992647072	0.391617803523528	0.570450235468294	0.387623721982879	0.518713193978336	0.517399221444237	0.388233241331732	0.426877421116374	0.410205770106958	0.416770114514547	0.429749817378154	0.431380332894683	0.407989602223053	0.362825322801322	0.174429512707837	0.342092235791801	0.44699242341884	0.222340949282972	0.280553720532945	0.270701872625856	0.51333375223725	0.365933467337984	0.435995641376199	0.369950880275036	0.334287727651183	0.258419927401049	0.485799428319074	0.454406558335867	0.43570653985691	0.467387797289002	0.381660781273762
M2008_12_CD	0.444133097163138	0.351081818182577	0.328127108894179	0.534527086942573	0.377322643180586	0.397708078634767	0.310250603715936	0.29196374995621	0.284064950613502	0.284094164521493	0.271234402794633	0.324231406868538	0.281103941704226	0.336629196407763	0.33179339304291	0.500713455820476	0.428744686963013	0.446058238640116	0.367392258363646	0.366391811261592	0.495762177841078	0.342111698444292	0.423923080235241	0.466769813114487	0.450822841562231	0.44292929881719	0.382503156308365	0.367071889849252	0.401224096162745	0.363884563424065	0.353436867560847	0.310079324067693	-0.00245430161608711	0.537218281402615	0.491046044767636	0.267895858051491	0.332079404996732	0.28902087969401	0.606795556549356	0.299105416528129	0.408884186606959	0.257233338568427	0.257699388736026	0.237711624474645	0.328123338892969	0.474386064808922	0.46746664401353	0.519691099999039	0.64537070767336
M2008_13_CD	0.461557882689845	0.257202256056289	0.321923583265058	0.535570146393066	0.270551150488294	0.406460736403966	0.233864543663003	0.247132868674321	0.157446193754399	0.183351311721278	0.158141472021521	0.274625608066997	0.118178808881521	0.111804927144977	0.246953693629434	0.495451931622034	0.40989436571726	0.467554794663892	0.369294698601697	0.408018079791744	0.474923343920637	0.405358284211029	0.472391288867221	0.435736844205916	0.31347994078534	0.387681706759133	0.393848715121482	0.316908283199184	0.33036911944421	0.403981514049438	0.469528029346809	0.394125359771042	0.0919473328687677	0.619098913421154	0.479992134104901	0.0974346204546735	0.223487182004238	0.198382896022156	0.707924016449505	0.44224820147082	0.435996014286812	0.48141012737467	0.385107729343096	0.210531672115696	0.38451729798291	0.556443589108353	0.534737635997865	0.669757141618698	0.587290852446453
M2008_14_CD	0.431204733067184	0.308853958938619	0.245555588218694	0.545604478371845	0.363110303737245	0.435488827399275	0.246698562923339	0.210538764665645	0.265219331582183	0.25280766950726	0.208518236660064	0.215250702895342	0.112090182384526	0.215192239280927	0.244692338347966	0.477852827123179	0.410766449933832	0.502864367358206	0.392205552277452	0.433821305127852	0.496506200454097	0.339744633226917	0.451418695037232	0.458271629615695	0.374745041931071	0.451441701028826	0.406208438008234	0.373947949875135	0.435726952784244	0.396751421229037	0.375233656336863	0.326596263279175	0.051171069470354	0.585158593030147	0.437522433624614	0.18190119087677	0.237055633671579	0.228911762448932	0.667806289036144	0.372384137239244	0.463992466438668	0.391778500841889	0.321994192917877	0.229677643025396	0.384249014925438	0.535345518670762	0.540996607807642	0.566073800975096	0.644071331745147
M2008_16_CD	0.398981115141139	0.323178029907967	0.212628704421562	0.531133396255432	0.241091730731008	0.357772196774357	0.225151298179962	0.168703276944212	0.0645698122288865	0.0988575408998389	0.0690053604725044	0.152919118544596	-0.0419079246182101	0.0728180714656977	0.163294250951031	0.396496262322032	0.370046125169313	0.415051947646102	0.364426828303563	0.446201337555488	0.511889241169704	0.405057227694252	0.43314695375621	0.433642252140998	0.2765257734355	0.414580470280804	0.368098644994483	0.349979364668102	0.357920661895956	0.318684218925254	0.373353564069366	0.349600562357068	0.151716454599564	0.748351125349531	0.497656975736781	0.0337625115321837	0.102978621139885	0.0764540076272146	0.731145942673558	0.39277257349725	0.509133794195629	0.454262206632679	0.312902884588081	0.208355990654161	0.339027155647277	0.528440691312094	0.536330368339493	0.601877153680897	0.749614256181164
M2008_8_CD	0.529553060048225	0.267975127189574	0.395286291998095	0.510375383744102	0.325506581693289	0.45316402839476	0.239018082290161	0.294390814722873	0.231807466915012	0.2130295404983	0.224444234371809	0.251606632418338	0.196956877077696	0.210314024723831	0.175146688642152	0.499524689731977	0.392112014052114	0.437673703476233	0.397344130053038	0.372438296236293	0.443243211880213	0.380516039620098	0.422165383977554	0.390975110550553	0.340287257895681	0.374158238600774	0.371324325955486	0.29338865800638	0.363509215651146	0.390663291974402	0.4732777383071	0.438485860571318	0.0618528499425026	0.512906576463814	0.430533840247802	0.113124002557657	0.220475514829563	0.223219972809502	0.625239300211898	0.446870122500545	0.385366541803245	0.48708122000949	0.393902266635669	0.256139032875001	0.579080906848759	0.590288171513907	0.554567506881903	0.655696360694922	0.522798719853449
M2014_10_CD	0.255570357335718	0.247150354993351	0.156911776046577	0.122545547273768	0.232219362471277	0.285996980801089	0.203674909320159	0.24854493917224	0.231571924312439	0.309609612890218	0.326326746175744	0.355747280277222	0.225822274437901	0.205316125460495	0.247269718221338	0.286921358307899	0.299960600626302	0.420449991731013	0.37873187730126	0.404651552980644	0.194216568396017	0.261163206151469	0.252349791539076	0.276848552571539	0.262579128875508	0.272025314016748	0.358900036461285	0.283134476932707	0.28010699619408	0.305948005418649	0.360028277574845	0.362132271878491	0.184134368534854	0.0858193400299028	0.324771479581949	0.293900759770403	0.225265060079461	0.293356521731057	0.244860147768963	0.44151989840894	0.485532724299456	0.510877296957483	0.44253577932608	0.417678487467573	0.357016519899694	0.300358924692012	0.310488243521817	0.26478768841458	0.155365721928161
M2014_11_CD	0.387341429478832	0.278399584416177	0.256926216730326	0.317147515628438	0.263052028385017	0.327050166622761	0.224763840733154	0.325999478057169	0.298764616377905	0.26666021431835	0.310265186304073	0.28403611631403	0.20422564358546	0.317398090183825	0.259519074707221	0.346659466601344	0.273259599783169	0.421950149939943	0.375144410791141	0.432078079377983	0.267626206478207	0.291918092523793	0.265345362288428	0.353946291017451	0.314160363500503	0.298979396854493	0.322757888027317	0.204771580682551	0.233391304372467	0.372792924985903	0.395567792936054	0.422580795582596	0.195018981589186	0.248469254013883	0.326748912118165	0.282278623362858	0.25433122040838	0.313906865312586	0.498552489713951	0.468303944482389	0.419578713953148	0.495160653489434	0.504845634866877	0.33120400225132	0.465703374430603	0.403224101666415	0.382100718721683	0.421395396182363	0.349853644813779
M2014_12_CD	0.323592275701015	0.3120922286849	0.148940706386635	0.216241834890155	0.240217684359651	0.277906988727038	0.232798027264359	0.294433675935977	0.198511387777434	0.253774805212672	0.241593068484865	0.26203428563689	0.163596479433633	0.100570505831025	0.256097056809914	0.305222219178894	0.329300164642242	0.412470406301922	0.37179579335623	0.348619491394808	0.230181011824212	0.254400231761736	0.235251150580618	0.233275723211748	0.206831712350173	0.287876252692886	0.410252869758179	0.299784170946888	0.249190901451323	0.329208757724805	0.402754672190686	0.437969765809455	-0.0688503261004598	0.191717127584802	0.263319715127992	0.185960454598441	0.208679209400985	0.296555120233089	0.447581524085392	0.426332878426434	0.439657820215603	0.476576938641663	0.401040850449101	0.496780346698868	0.333742167037877	0.303171641452704	0.417930043420591	0.384397082856738	0.387592332665773
M2014_3_CD	0.302644813239081	0.238549336230153	0.331302552945631	0.0544019212092082	0.369344145678467	0.225144982745597	0.166546055430878	0.285654886366041	0.285684944026817	0.0302573169445657	-0.0572852049064775	0.0625111244291593	0.266281696329343	0.0609670860003833	-0.0251245548688365	-0.0901278818595865	0.208880101645513	0.176154703962429	0.145893262994933	0.0780856037682552	0.254662916033485	0.211132490911339	0.189475726192553	0.201788269113434	0.322271994796504	0.197114687790482	0.365006310639241	0.33862688086999	0.270447044949024	0.0948329734218108	0.18678057194286	0.168087513256606	0.102252603632491	0.0411284666662375	0.308295286004609	0.319951086748192	0.215999698436292	0.115193717379408	0.0154281695895252	0.268676307176949	0.265929202793557	0.337014983071079	0.262573094067304	0.47794571861647	0.28659225535233	0.191587991955805	0.352381526468044	0.109350318181707	0.148268594302059
M2014_5_CD	0.274708520067879	0.276499553540328	0.25835468700266	0.0697001659235163	0.350127357804051	0.300763130896229	0.275707748911315	0.450541641290224	0.230869675106002	0.160355052706683	0.284644136100555	0.19158088786524	0.211342487222775	0.162688645647416	0.205719932391706	0.142899175431014	0.197661561396487	0.223898242404535	0.128770603598285	0.0109678186848091	0.303472554323402	0.292194073510313	0.329264922438715	0.330139039684595	0.311281686003044	0.225716568354544	0.421614534575985	0.33316384366501	0.233418476098663	0.184031003200604	0.265751829541132	0.255352739827882	0.382266005529843	0.0225897752491572	0.265045638253135	0.333324218795157	0.348644770056519	0.277641895969924	0.0048007175705305	0.267612351079827	0.291031247355742	0.398808720741516	0.268670629252515	0.46006493440533	0.162351005734511	0.225422237877958	0.359392672443353	0.218786774671668	0.212674835194814
M2014_6_CD	0.39669797343133	0.244931202911845	0.334283453013064	0.169072764203852	0.308526852184265	0.277711330004514	0.184426854259424	0.479770680891945	0.205640974553374	0.174569197827097	0.161422378798621	0.140494265917625	0.151932134539073	0.171920256103414	0.0735115173544054	0.23536310938114	0.252366468867139	0.246120726716334	0.249488358449699	0.0824459525492919	0.183658791869122	0.183742115236861	0.311749381530979	0.235771900593581	0.253110971118149	0.193856031348624	0.361882940558416	0.275524366424857	0.168306444406567	0.186084662056625	0.273883131267359	0.309343428439621	0.0922045671364724	-0.0746621934503484	0.313847357502853	0.222864926855124	0.103810589639593	0.18258416818914	0.183187939471636	0.335918663840957	0.351271423000565	0.380002181399572	0.286727742962283	0.494910343271336	0.209445043540085	0.303005589088473	0.46750941941323	0.248917021588562	0.381497756484519
M2014_7_CD	0.386408730994409	0.16230571306791	0.344453983726916	0.238116498661771	0.562677375225723	0.247819793850551	0.103905575857018	0.415110416484572	0.453714732282536	0.505764625672619	0.173442637442327	0.292392588836437	0.106346541363307	0.17683502873203	0.258116230496139	0.178084821819307	0.229173120509984	0.464189372124765	0.135902576922475	0.159806567218173	0.113852014365246	0.294162254088795	0.232751990202838	0.135512040633766	0.211078981885938	0.283993864370602	0.399276348021319	0.393952470626542	0.36659115822023	0.0965353928832148	0.28300834201888	0.275598080149341	-0.0690137261099281	-0.0145882782901298	0.29036372693659	0.245780822465063	0.314058546829211	0.224940992603867	0.214794837994818	0.282358800260751	0.294458403426644	0.379905707691967	0.24665518891189	0.589470485489301	0.223418838728322	0.419731605486379	0.468856383452822	0.294861138167645	0.392185177065135
M2014_8_CD	0.386656317043053	0.252786153832938	0.35317515633131	0.363263923055961	0.476495270309471	0.349293470760469	0.273051336028395	0.365018908326563	0.360882480246467	0.346779682937119	0.248930987534584	0.339454718907165	0.277316352392911	0.302782795315775	0.303402161533332	0.407543683078961	0.323347179758954	0.490553259889666	0.339530644490302	0.320376536478313	0.212081088698768	0.320655843358809	0.168412359205183	0.225944616713801	0.28885605747067	0.278495862595568	0.430181488634676	0.313507558309588	0.204008142390781	0.320699884429348	0.421634667434186	0.410404388404859	0.0331823126349891	0.0864373990602699	0.32582265039881	0.236375657460895	0.210863064055637	0.284267320396226	0.357978565222901	0.452751381841839	0.41232717929706	0.488050192846962	0.418653798721756	0.504375168347892	0.387488273005011	0.388754479871469	0.496695063629955	0.452385268098573	0.390265652655964
M2014_9_CD	0.330714823257064	0.277043490923933	0.265775859337234	0.324747345388237	0.310762393901159	0.364995558999431	0.249568452738711	0.309722558909058	0.265937025757883	0.395868926001951	0.375343958448716	0.448050613008098	0.300641206539851	0.328113948600598	0.331937459966529	0.410942434148181	0.299539709314014	0.434886037754269	0.413512487016025	0.421069463720768	0.340410001333207	0.414686952109597	0.286605775203866	0.306610743696458	0.247086006870557	0.291690926902123	0.350669731856037	0.25597003792574	0.233398168397795	0.372275552891744	0.424234488482729	0.472122708011263	0.280232143556562	0.326079905996793	0.436235754307481	0.292773243231565	0.316256098659427	0.316013473817936	0.463743576740079	0.454702430885832	0.538179599383362	0.520478604238896	0.497483948710889	0.472706321936426	0.430549034590523	0.439220719249227	0.437011791917618	0.396326772633162	0.419850069600541
M2021_1_CD	0.493588925353532	0.331229778812426	0.330040451822631	0.368782367210198	0.403653947332213	0.438172951103432	0.356188775313727	0.429939285405171	0.319605152829272	0.300983904874246	0.397438083746019	0.340126173644085	0.328769511084742	0.232498063234928	0.264491437237606	0.349386228907299	0.394346007153615	0.376064524774023	0.475552287465295	0.395319301057492	0.385129015812168	0.470467782328368	0.339886408692114	0.314720887819719	0.376977175703158	0.352809182582017	0.406839976544871	0.383304516089814	0.312819064029985	0.410602395771547	0.44168215991575	0.388296590280588	0.16055823917606	0.241406696206591	0.486050451645062	0.202793292654288	0.197708496809373	0.236679486371619	0.445381357450601	0.419841114132945	0.445695881929116	0.372815959148958	0.46122245528884	0.417023652388355	0.501955456697613	0.436424060900588	0.425371803219829	0.424698570662955	0.510460755592952
M2021_2_CD	0.379970196640939	0.313512341279224	0.220341978379995	0.274214655001754	0.34300664234034	0.395474262725131	0.252486505999932	0.276389901412937	0.260164715592797	0.32051574709542	0.328886284699406	0.373250740985604	0.265985570666656	0.324390807402075	0.328985308429619	0.433526749062362	0.486926632963211	0.40987517501347	0.467165814590135	0.488254675352746	0.326160412730654	0.365500861368238	0.393551387894175	0.323544416085065	0.2957461749388	0.410465264507278	0.452051352172087	0.407492924845558	0.331886509110659	0.520695723139987	0.418967979667679	0.410374177634997	-0.00476439566274448	0.273071897089851	0.464940724873014	0.219271541801811	0.226676405854837	0.326290745033745	0.389046756159592	0.405675954625059	0.41096868625142	0.336218625275035	0.466375267493362	0.282692072267605	0.432865943343044	0.470726909803662	0.383416361615254	0.440074908204043	0.281840028878236
M2021_3_CD	0.476705639628415	0.339343998178688	0.281716238922189	0.340925083379138	0.351543146518371	0.384876596032402	0.303971865673186	0.265868318915464	0.351947414110256	0.31068412046601	0.284161238017221	0.314297299339941	0.280325569863141	0.310521457878046	0.295691404130815	0.34772677321277	0.381414292075454	0.392815588193678	0.409761004965958	0.348705123279172	0.388586049158116	0.299610334688031	0.335230726147711	0.323575868600591	0.415895201160344	0.381573289045854	0.417894880282468	0.348177300746054	0.317861018990548	0.486837668975783	0.449165260058442	0.402552827344043	0.154414236700279	0.264948046451054	0.450345090556759	0.275829573610264	0.223953260622226	0.243943786013418	0.406800854278867	0.411850234106812	0.358843088603457	0.450209924000039	0.43715757640866	0.313952673088632	0.308599617463082	0.381165662232738	0.35055173078374	0.355767778354089	0.400426751121996
M2021_5_CD	0.505266016132172	0.455738812042667	0.455106175377831	0.391638264091238	0.471509329166985	0.460420761602164	0.363630417383377	0.425012927901727	0.41452860808522	0.385409048402388	0.381663369475231	0.373145040270446	0.355759569461365	0.414578956323884	0.411682886465308	0.411237815733419	0.474537226564315	0.410246999920922	0.422090691859549	0.489031240432526	0.384032081101924	0.348460484105718	0.37341025343294	0.380675423293841	0.457968584437988	0.429843607224095	0.407785566256935	0.375527237577214	0.306248280606405	0.465801489504016	0.406136562147035	0.326080201833878	0.148606788188849	0.232511432359854	0.414793061752085	0.254881206529153	0.297418918314822	0.350864302910715	0.392957316639465	0.407735837336668	0.443307920571764	0.35281299485331	0.423406186855398	0.309299204737862	0.468980704887247	0.350395874334126	0.395685717579155	0.318192100834618	0.371590947479592
M2021_6_CD	0.50523501481712	0.390042358100928	0.331423833358661	0.357941069621772	0.407353022447969	0.384165676779982	0.361728780388589	0.396349473701517	0.345704223710591	0.413895307303653	0.426954670910813	0.406837384514197	0.368044541070078	0.389410798012573	0.348738175762246	0.430958596200569	0.462971710705301	0.507109862689995	0.496789947467391	0.489494377235782	0.4081699642125	0.372455495431212	0.378171129967203	0.381837491172635	0.378680297218576	0.411432460513908	0.406039980910192	0.376045154629047	0.398041312482033	0.461199917766345	0.443195993598235	0.4016193229499	0.14886521094192	0.234520913470235	0.434420653929937	0.303303178320662	0.294198024000583	0.358098907772806	0.47313651249164	0.447270525509101	0.464952481483794	0.438256357874207	0.443473072400162	0.309215429515324	0.408856438855341	0.400652040034141	0.396895433216979	0.355417906828936	0.387349109339041
M2024_1_UC	0.3231060272996	0.187501220565558	0.215430702108864	0.518556244465219	0.0483016302471563	0.203866230846401	0.243302073175102	0.183714699522109	0.0752143063401674	0.00787254072701846	0.0912702814258358	0.0909625524642291	-0.0489711759795503	0.155433307494701	0.0259272013046964	0.451431489472216	0.338541120293244	0.316870791590358	0.379814606165608	0.33004958814306	0.515006421090193	0.404972858478199	0.398885765440693	0.4957775827098	0.258243580241437	0.370331631606416	0.242757940171245	0.357089969680885	0.352966221211951	0.269201408224158	0.3118912685467	0.327478653717218	0.0764177178362586	0.663481880305651	0.336229301688194	0.0875602034240402	0.0866676787729432	0.119448219069272	0.6940271154639	0.320681381050529	0.399736741915167	0.399086091391643	0.143076085801294	0.122507759265101	0.424626939137167	0.56320580269295	0.57922309771674	0.632848292866238	0.760806976299211
M2025_1_CD	0.410970075820974	0.203979460084295	0.354086230934165	0.204178064924438	0.271766246484709	0.321495007551315	0.24800648726861	0.205101005353228	0.27032579702633	0.166749465416612	0.277796729373876	0.214608959305949	0.184613111666255	0.188453785772601	0.168411717157102	0.394104923327258	0.309346604290752	0.342576796706762	0.398303194968916	0.33426665792477	0.24564358693048	0.277981583883355	0.265446871085063	0.250980857660571	0.339776449477541	0.350888932806223	0.383399208017906	0.338033311351911	0.245697783010968	0.400647575822523	0.402777450507295	0.431827145094023	0.0244054031850851	0.181541330116957	0.428665733766264	0.179375534719625	0.273085324127995	0.285024108208451	0.29844621805403	0.384191235303891	0.337423284828377	0.446611954375904	0.387872458612868	0.319715802540584	0.409807396144558	0.358492300816337	0.429693721117023	0.381601028587187	0.24942726837395
M2025_3_CD	0.422806791405866	0.318403743998436	0.309796420993288	0.323332399647835	0.393931805898872	0.496318321811853	0.325892000389317	0.267673352464943	0.293392982447277	0.175150451833918	0.218026814199191	0.251714662503421	0.212721227114357	0.270808572457868	0.200579936542558	0.371313856332606	0.444440591964474	0.39091135986208	0.476742610628079	0.457105735695491	0.346120333172628	0.376519092623117	0.350044138613583	0.365112082769261	0.343239321282645	0.402339023973624	0.392479216397518	0.399275793465364	0.386671423329452	0.474930134032568	0.529667491884259	0.49629944164874	0.125737593944374	0.308077199642257	0.431595627436857	0.320184731573695	0.283923870135941	0.364032592204878	0.403989602303951	0.44565014973891	0.478648926029341	0.448596244187102	0.498071532315244	0.3438884180319	0.552559175333715	0.45359757332197	0.471793787485326	0.452700940005692	0.37243133773427
M2025_4_CD	0.379414816620785	0.421684555447638	0.264127013713261	0.395415957688648	0.374300267799724	0.401669974470899	0.387776141255188	0.338025701577185	0.325369393600529	0.285558343138261	0.355117257816936	0.29080257019849	0.288885674861825	0.335879503577482	0.351319771684827	0.38566745877942	0.452877287989123	0.424721224237426	0.504835288250793	0.497370331851464	0.368824460081783	0.26954906249853	0.387869317008301	0.406567523674157	0.430587546094915	0.412935893132271	0.388041062018597	0.413906419307691	0.400842608153102	0.433241032757055	0.425225479289731	0.433970281753921	0.139318953999212	0.247349277141735	0.456378513396517	0.366865501177225	0.422121380705027	0.46621103001878	0.39686067746725	0.397029781902577	0.45780673348583	0.465118360145836	0.446435530930603	0.3366518096723	0.470054818626001	0.323775684653234	0.415981694794094	0.327291299470966	0.42683782056922
M2025_7_CD	0.318045900518764	0.280825462813418	0.213190021424753	0.232868281889662	0.420699069481593	0.447640881375734	0.309707643123909	0.262370884730784	0.337906238604811	0.244360089199329	0.205980861502516	0.260023271774074	0.273433135098485	0.223760339793892	0.210305967952521	0.182360007268701	0.406762894946097	0.457659943746199	0.446000531262799	0.415001631175559	0.336525174758187	0.303346401134417	0.337328379861976	0.30726840849004	0.335335865055488	0.365939038236664	0.354843863409317	0.324517067990375	0.305833290879446	0.41357199991301	0.479760983404407	0.500385549261548	0.0630763949769494	0.0962421889255527	0.483693952122298	0.295809700534952	0.288030484250281	0.344572238561338	0.27411808325615	0.424720212000555	0.379949789491487	0.4206216187523	0.423202533662033	0.339487631791041	0.358153140274939	0.415213562756503	0.383466150676635	0.338841933198798	0.2773864274127
M2026_1_UC	0.509779212748049	0.114453733769497	0.397352645239348	0.656262459315091	-0.431881177788915	-0.15973693632335	-0.082806980555631	0.179105292469149	0.290644030399271	-0.404813404398757	-0.00728021172433461	0.0828239250586451	0.04433038319884	0.148782960410019	0.34326783890181	0.583848068326932	0.0480301124780766	-0.0977919995848731	-0.0950359132340248	0.0134813242601989	-0.0437533046725116	0.101839594631752	0.224465624885717	0.23560774400644	-0.0442359653785616	-0.161207939618771	-0.54590226081599	-0.337595564134407	-0.229529250892391	0.222727534896512	0.141868638303281	0.147947804853327	-0.0928254188920155	0.804698207665404	-0.0885422004151433	0.0660597688594619	0.125370945842359	0.309268725597799	0.707856405097414	-0.0718858571913409	0.0702143015922512	0.155294133336332	0.0116973855400775	-0.471645427800727	0.347212595207708	0.589417521345925	0.673125982446837	0.71840180053067	0.858979244781899
M2026_2_UC	0.409155392789595	-0.0180719337332489	0.298009487381798	0.645755467095045	-0.343861050141943	0.28706576693777	-0.0764555530711179	0.249588868415179	0.23101126369788	-0.290786011255569	-0.157711938530053	-0.0877819665230125	-0.294258552346144	-0.0966417984830189	0.0062654570227567	0.557446722256754	0.20179497384368	-0.0564257495768433	0.22115406321481	0.354135661756361	0.157823238865598	0.255293025120386	-0.00247631883851547	0.143442621907899	-0.30068447471703	-0.208683298657053	-0.411383426426223	-0.181956165022433	-0.161646570789625	0.0743941807214192	-0.0946371921394992	-0.00694590325990579	0.415400467209343	0.787405827040008	0.308610517336056	-0.214079469105222	-0.263064410707672	0.0851228487141979	0.697735423000052	0.0177693445660424	0.1596893234338	0.113545347713775	-0.239103927650927	-0.404933092724148	0.412939464936018	0.521201330529582	0.578770757962912	0.64693653946963	0.809424125240356
M2026_3_UC	0.393674981865794	0.107439404409741	0.143451289415803	0.628728944210962	-0.000600417351493162	0.437002423790446	-0.0396059362938413	0.336553818050663	0.115753059154827	0.12331646139675	0.011420267178331	0.190972353361876	-0.126326710215306	0.0280274656821178	0.444517153068332	0.471937536581688	0.294295427394313	0.250929748014366	0.43714774284605	0.391568634538775	0.480406994559618	0.40344147534189	0.424513642794455	0.337692443076851	-0.0917097463931868	0.170880290067844	0.077739812892854	0.193034850966499	0.23002267124444	0.0176177475796615	0.012712643324073	0.0424402216511299	0.263861956865038	0.783838870265176	0.441351184218104	-0.164562989623973	0.0353794437697763	0.0451517657486824	0.735733859517888	0.425813776308517	0.557639432286431	0.280698382826153	0.0777680960568353	-0.150686663052299	0.255085363919414	0.519554805270584	0.534846426189657	0.649045731995238	0.838470570153823
M2026_4_UC	0.427837683544379	0.31265851552319	0.257425785595457	0.606489459272153	0.157996357401729	0.4934054529869	0.228272203796797	0.32589873551822	0.200185853629228	0.254790516797494	0.22269391470555	0.269806987171907	0.0550453584270947	0.329866156041847	0.446909737085098	0.627317620538483	0.486426570592938	0.377088179945858	0.447295268739333	0.486308411945364	0.407364624226143	0.46503553836165	0.423118086314645	0.377265146052715	0.129406700759782	0.292798181888818	0.240929876885753	0.347270534844951	0.316694129491399	0.21974074577386	0.283551668323865	0.230888759585323	0.206475074608048	0.657182561943559	0.452975210579575	0.0190177146968515	0.037467864368811	0.108406982779862	0.730230242990675	0.453396722043326	0.576614163151066	0.487000638908257	0.298736201437507	0.317383070022851	0.503027599327811	0.579807902581285	0.593034520581782	0.611721166583156	0.688778577912685
M2026_7_UC	0.291083976212907	0.355932311068727	0.154619235642639	0.525842381118807	0.153208933620589	0.271979985097105	0.182454776377014	0.332094574753253	0.0269865462407829	0.201619354424002	0.16549629236928	0.249064589765918	0.0336402307584166	0.167173822106048	0.495037233420525	0.494916768820447	0.327583294944194	0.235783830887138	0.323151370444662	0.360928854084772	0.446744805165795	0.405660373154869	0.379422538642008	0.442244570320703	0.183014622843297	0.165853187364499	0.218525685546886	0.224216439863458	0.281515761742831	0.0834515998723355	0.125974058764386	0.0779550087452219	0.200404268242418	0.711839642184007	0.31322124871812	-0.05407317562596	-0.00575628096295815	0.0302488879073859	0.69099390443394	0.312658850117388	0.42780870787214	0.402637269534336	0.174657377952871	0.2002400384077	0.434860215952699	0.442509067288935	0.469353449840625	0.529319188993712	0.770700155824214
M2027_1_CD	0.175976680989131	0.230621331599404	0.0988996408837725	0.197364711357667	0.194939646808938	0.340700323201122	0.18799197261101	0.158145044116184	0.0896429249184206	0.0396858868782497	0.182525446603349	0.177172791966508	0.166778638844098	0.221514540025292	0.0334520214813819	0.16842851499789	0.243826186813438	0.289474337540645	0.21244065321132	0.374174792606964	0.16431536871449	0.255399104223236	0.110283809057254	0.131174337843494	0.116496107176637	0.147854373881599	0.145910854698686	0.177573447695876	0.219901157736871	0.157326018871763	0.18521546950647	0.140198476534332	0.275956814502011	0.110063718244957	0.30207917444138	0.0621730345478346	-0.0978828598111227	0.0544366976225717	0.285976584806165	0.218088258466166	0.304110187936604	0.268884276746924	0.306885370443192	0.203664456447768	0.442821765369979	0.318629008155367	0.211463639625535	0.276107176455564	0.26560780602412
M2027_2_CD	0.269584682379375	0.220267233037713	0.135143360487601	0.166577093370905	0.237493249408733	0.254082159451418	0.172484299016885	0.219294372391783	0.191963668569312	0.0924519138219779	0.24481176891239	0.254600442635352	0.265412538915946	0.241484849488104	0.126049725516323	0.307177912320031	0.352025903429569	0.449802233363179	0.371615924738143	0.412316690513961	0.184306182285649	0.295797971084467	0.240826591201931	0.190369445103766	0.148859450135266	0.314923269464201	0.352578674161549	0.293171769968853	0.233942206424921	0.338341075686677	0.349878432097955	0.289796863526329	0.184779778869037	0.162043292976631	0.323073375569181	0.19103652979093	0.176953510519208	0.266766813727888	0.456292307557736	0.453721197609944	0.420567827783927	0.507971023672763	0.487745315417766	0.323162828569312	0.406390250101591	0.364662905247792	0.336701305150647	0.395357202456975	0.33558195237029
M2027_3_CD	0.215155171013446	0.208592562064361	0.150031601395361	0.170187496321881	0.202504734213313	0.288696751582402	0.15655722775823	0.200633538731515	0.126065896680775	0.151547583230557	0.185266595652429	0.181936619340684	0.209369636021028	0.199856075129464	0.0989559530372086	0.198154746777259	0.273397841361237	0.352314680955882	0.265727956758878	0.393843270093095	0.231110187165176	0.217197450883635	0.146341405690169	0.196053842571236	0.149636156204844	0.227506595760616	0.21551462830793	0.215892398567393	0.175328291818294	0.25457145359011	0.265812464273296	0.271539945005932	0.0106515851124933	0.123937596952607	0.247309165962207	0.111656997302253	0.0879643659106078	0.157320663668368	0.35968311259667	0.288149327693485	0.338305189137278	0.334595424721464	0.288902224887243	0.269700383695881	0.439143952681103	0.366139108452126	0.296276683389609	0.338487055422395	0.257919976755964
M2027_5_CD	0.262642225934447	0.27677289287311	0.120826407828333	0.180065521035679	0.277215031100871	0.299715526010801	0.216382625678511	0.0557914869192328	0.161335352903925	0.0138418639216954	0.172205667500953	0.0658635090732651	0.0957315546617592	0.140156062531648	0.0931458450027225	0.134287926341035	0.379004259742536	0.404393244188589	0.332468585067113	0.413541761731948	0.276407926386092	0.371473318510065	0.249086598121094	0.345885345969629	0.210951558064157	0.304424939889221	0.333664768548071	0.272471041994614	0.237374265478227	0.165505365481084	0.19925844065279	0.171230070541705	0.139736782015879	0.269538373032009	0.324875797439151	0.0671018916680337	0.0871503061267511	0.154335659090949	0.410328245119954	0.328490999174433	0.403324410293353	0.337388016629791	0.396292957169334	0.304343182888812	0.42875675874759	0.447934367663329	0.32897714254449	0.443400534148814	0.437791679030953
M2027_6_CD	0.236935203100479	0.250427129687601	0.020029799850121	0.14879585844334	0.23038678657028	0.303576670370828	0.18296927399645	0.0402074809611239	0.142381526218457	0.123707204289898	0.181144824057574	0.137634391525745	0.190792261047113	0.233103074449863	0.0921888825550717	0.183720835051385	0.390258822070921	0.431984119173448	0.372531003458097	0.461440207327339	0.297219341854475	0.322247340510408	0.275494162879101	0.282625420364497	0.227290368453988	0.377087299822191	0.343328678600862	0.382585544449094	0.350328549382286	0.291180250235395	0.285582193125318	0.28777354715371	0.0535574605892895	0.197331342373759	0.35782141100116	0.203857896909479	0.131660293437261	0.22281722201552	0.463427089549954	0.390917345444278	0.470351987409808	0.427818266621035	0.420410834485613	0.32081250927305	0.469707612687355	0.36287011002011	0.366313015686025	0.351079599971519	0.454753940506842
M2028_1_CD	0.482817272153526	0.278426639208807	0.29722659801877	0.294151337395222	0.41432400234332	0.395503061899546	0.37892484634126	0.403194929608177	0.344867355963031	0.287603436611121	0.298731908940162	0.30735046746007	0.295713101730132	0.258968431408573	0.166450440575814	0.333960695370124	0.439092304361685	0.424575482605897	0.436248310628224	0.422081164152308	0.440251026317906	0.383226676108976	0.394850077024153	0.402288568179497	0.458137474974934	0.466341897215611	0.446821973757283	0.425293445683339	0.406784742973554	0.510227633584196	0.493268024580211	0.459688453147994	0.156016889918453	0.336545418519205	0.495441603681896	0.256978458064706	0.280264900041414	0.223003300607375	0.385589297659358	0.404881773261994	0.40102435734394	0.405086983245822	0.462412216816668	0.411655808800013	0.482515589345933	0.390817897572485	0.470572265986177	0.422522772343247	0.496171289069963
M2028_2_CD	0.332917605851161	0.352217937534995	0.19252567108252	0.350944265059277	0.300977614026132	0.340034182501859	0.368956050747569	0.367947573104196	0.210346297774901	0.269920742667145	0.291659602029679	0.277229772602488	0.264218843083852	0.369904389993603	0.284366906461663	0.345862416524502	0.406159735080297	0.364256766699624	0.426269050487076	0.45766700203888	0.502582218988297	0.46070167508506	0.496129334748967	0.527952801270599	0.533606500125381	0.436804064670312	0.469673217624821	0.472572406112241	0.515361490752959	0.543672798330163	0.464049705354343	0.432550615856206	0.10489229372021	0.326877548553883	0.453953828761344	0.315326632760091	0.305635766704198	0.184529521752567	0.37807486743491	0.30256444225413	0.36015456457749	0.293281499992514	0.34294907823826	0.282556294228683	0.421855235905519	0.328332105718619	0.355887589922234	0.303992899096323	0.430451084170462
M2028_4_CD	0.519526569056213	0.326965995924181	0.456134319485311	0.290866497104323	0.49236869855266	0.365627420578867	0.370682524966786	0.411566010760317	0.445818916556901	0.266529380140925	0.1773821637836	0.2760542903241	0.294339961899806	0.262685325392602	0.235880421681617	0.278436732107127	0.42150722821373	0.407199910955921	0.444916186962524	0.450307821877577	0.444302060997017	0.374140101676609	0.396756480400015	0.483734590531966	0.529658305247214	0.424099162092079	0.401007156915524	0.460141709284489	0.400671281614593	0.435288034148879	0.337676186410971	0.283782059484816	0.0139509279477524	0.146681376566671	0.492477467718465	0.248686956741403	0.239625314782857	0.289368770355626	0.359210591815589	0.310185836469129	0.305390362889872	0.250891148524801	0.339055192465646	0.290953862664956	0.289622483753554	0.224626794200739	0.335182082751393	0.289895730201273	0.346335083165425
M2039_1_non	0.435558732886417	0.23769402563302	0.320386030845527	0.300864747448821	0.339754989754266	0.334998438019986	0.294178188772586	0.29666811307306	0.350231476729159	0.283862743815222	0.327287683944237	0.290932503275855	0.292317339126581	0.207101473433376	0.172412562052885	0.329061827314113	0.453539323646461	0.486646798166399	0.492745161186032	0.456441535826239	0.43886832093605	0.371616008722799	0.418591327490202	0.438088055147134	0.442850644611062	0.45771546174294	0.483151304785715	0.397025025032554	0.430261933692706	0.492597412041605	0.477597231431007	0.503067728653464	0.185702777527919	0.289684875614855	0.471398779615226	0.312706605057904	0.321360798812094	0.373577164811592	0.502763942035298	0.499746815805265	0.453090463058522	0.534213523741438	0.504263668904291	0.367387804579911	0.424066148139526	0.446375026306736	0.453639945170202	0.50128531288677	0.41395088342606
[truncated: 98 more columns]
