# Supplementary material for: Understanding Horizontal Gene Transfer network in human gut microbiota
Source: Gut Pathog. 2020 Jul 9;12:33. doi: 10.1186/s13099-020-00370-9 (PMC7346641; doi:10.1186/s13099-020-00370-9)
Supplement: Supplementary file 2 — Additional file 2. Jaccard similarity of nodes in HGT networks in IBD dataset. [file 13099_2020_370_MOESM2_ESM.csv]

	C3001_1_CD	C3001_10_CD	C3001_2_CD	C3001_3_CD	C3001_4_CD	C3001_5_CD	C3001_7_CD	C3001_8_CD	C3001_9_CD	C3002_1_CD	C3002_2_CD	C3002_3_CD	C3002_4_CD	C3002_5_CD	C3002_6_CD	C3002_7_CD	C3003_2_UC	C3003_3_UC	C3003_5_UC	C3003_7_UC	C3004_1_UC	C3004_3_UC	C3004_4_UC	C3004_5_UC	C3004_6_UC	C3005_2_UC	C3005_3_UC	C3005_5_UC	C3005_6_UC	C3006_1_UC	C3006_2_UC	C3006_4_UC	C3007_1_CD	C3007_2_CD	C3007_4_CD	C3008_1_CD	C3008_3_CD	C3008_4_CD	E5001_1_CD	E5001_2_CD	E5001_3_CD	E5001_4_CD	E5001_7_CD	E5001_8_CD	E5001_9_CD	E5002_2_non	E5002_3_non	E5002_4_non	E5002_5_non
C3001_1_CD	1	0.264550264550265	0.354407014305491	0.331403762662808	0.288790723357261	0.231728045325779	0.261231281198003	0.24092970521542	0.287309266840342	0.128850102669405	0.13188479029813	0.139933166248956	0.174940089010613	0.172907998150717	0.121870571563533	0.193121693121693	0.150561797752809	0.141966141966142	0.150018429782529	0.159819413092551	0.130475302889096	0.138518024032043	0.134808853118712	0.140568099053168	0.167910447761194	0.131942816967424	0.135531962954597	0.127686796315251	0.12579415501906	0.178220451527224	0.138762389499062	0.148908523908524	0.0681818181818182	0.184086021505376	0.1344	0.129292221443588	0.116645911166459	0.127013345605154	0.218840579710145	0.144590846047157	0.134174848059841	0.144491663942465	0.177853783668234	0.155848918225156	0.0933503836317136	0.213675213675214	0.233595800524934	0.231655290102389	0.209424083769634
C3001_10_CD	0.264550264550265	1	0.255434782608696	0.317371937639198	0.326042378673958	0.336336336336336	0.341898643825839	0.33160237388724	0.197265625	0.169041450777202	0.160276555625393	0.184077079107505	0.152503793626707	0.17103825136612	0.177764565992866	0.156578289144572	0.17353198948291	0.14007267922035	0.156064461407973	0.191780821917808	0.183459522422831	0.139350453172205	0.179387457462324	0.171086398631309	0.157555049354594	0.122753733232093	0.122879301987397	0.137471655328798	0.145038167938931	0.139554553143502	0.124817731116944	0.126748740906547	0.0941828254847645	0.0972093023255814	0.163087248322148	0.136144578313253	0.132149901380671	0.132231404958678	0.116998950682057	0.129370629370629	0.150622876557191	0.125316914161536	0.15283203125	0.140612076095947	0.112426035502959	0.1375	0.129044834307992	0.128054298642534	0.114957264957265
C3001_2_CD	0.354407014305491	0.255434782608696	1	0.294353045798132	0.270449897750511	0.219192448872575	0.255825996892802	0.249332621462894	0.309869375907112	0.132530120481928	0.128895184135977	0.146953405017921	0.197126628800535	0.174311926605505	0.138863841298467	0.172343044727124	0.171573973100691	0.145970748494408	0.173242467718795	0.154499151103565	0.143808255659121	0.189712758851035	0.165555119654767	0.169159544159544	0.20160481444333	0.144268320698369	0.138522427440633	0.142928786359077	0.131699846860643	0.177663671373556	0.142486374253828	0.141003244322436	0.0566882148184983	0.140164899882214	0.134462151394422	0.146838885112169	0.123813291139241	0.134380453752181	0.163114397564158	0.140403039312851	0.123855211513301	0.121277249002149	0.16379655586704	0.150470219435737	0.0883040935672515	0.187454677302393	0.192307692307692	0.176151761517615	0.167283493708364
C3001_3_CD	0.331403762662808	0.317371937639198	0.294353045798132	1	0.291224147568474	0.267688679245283	0.257685858021241	0.250722125938764	0.237391930835735	0.151402858655373	0.157784743991641	0.162440911044263	0.169526424159231	0.196097096620657	0.140708393983503	0.245703669298653	0.132664437012263	0.115946261682243	0.113268608414239	0.143306379155436	0.145992366412214	0.112315270935961	0.1338199513382	0.135549872122762	0.149243697478992	0.11585790573485	0.12300785634119	0.135492227979275	0.146206447411267	0.174966711051931	0.142123750337747	0.138529259451062	0.0779436152570481	0.220483005366726	0.145424836601307	0.127202255109232	0.109446525176862	0.130009319664492	0.237741456166419	0.113111413043478	0.142721217887726	0.120528520786336	0.146515533165407	0.145787545787546	0.0962288686605982	0.22626582278481	0.230595327807084	0.22298163178129	0.26228813559322
C3001_4_CD	0.288790723357261	0.326042378673958	0.270449897750511	0.291224147568474	1	0.35748031496063	0.302857142857143	0.304576144036009	0.211840515505437	0.173038229376258	0.157826649417853	0.152756702073849	0.147364370911889	0.182436260623229	0.161037394451146	0.142857142857143	0.18001800180018	0.171093480510521	0.18141592920354	0.215720022948939	0.172004744958482	0.13928434013082	0.158357771260997	0.14664386489953	0.154706790123457	0.123076923076923	0.124846399606783	0.127350427350427	0.133333333333333	0.152023121387283	0.142127403846154	0.144380403458213	0.0839260312944523	0.0971891376846117	0.181818181818182	0.119047619047619	0.118881118881119	0.127467569091935	0.155518394648829	0.156592292089249	0.171310017783047	0.140560747663551	0.194919647485744	0.149787234042553	0.154903758020165	0.152586206896552	0.150729335494327	0.158269961977186	0.128647214854111
C3001_5_CD	0.231728045325779	0.336336336336336	0.219192448872575	0.267688679245283	0.35748031496063	1	0.279016141429669	0.31473771856786	0.161908646003263	0.143988480921526	0.13588850174216	0.133155080213904	0.111023622047244	0.149761336515513	0.146848602988954	0.11311736590547	0.169596199524941	0.139485734413526	0.154022988505747	0.18871359223301	0.168597168597169	0.136769480519481	0.146860404774261	0.145322434150772	0.135016025641026	0.111696522655427	0.111474584801208	0.125704120960569	0.138533178114086	0.129279811097993	0.129692832764505	0.120882352941176	0.0825396825396825	0.0801411290322581	0.187010954616588	0.110497237569061	0.114086770219604	0.110507246376812	0.114152591729761	0.139288738357324	0.16038338658147	0.125778816199377	0.15260612573885	0.131789848619768	0.12589559877175	0.140136054421769	0.129848229342327	0.157600406710727	0.111988847583643
C3001_7_CD	0.261231281198003	0.341898643825839	0.255825996892802	0.257685858021241	0.302857142857143	0.279016141429669	1	0.30256012412723	0.2002442002442	0.17128987517337	0.187371310912835	0.18031914893617	0.149940968122786	0.195870206489676	0.173694147262429	0.161904761904762	0.160851835070231	0.127450980392157	0.14373356704645	0.178591871780195	0.195258889582034	0.151190476190476	0.190721649484536	0.181613339342046	0.161124307205067	0.115702479338843	0.109555391795628	0.124675324675325	0.138461538461538	0.149297423887588	0.137082066869301	0.135927969793784	0.115853658536585	0.112599206349206	0.170043415340087	0.127597672485453	0.132467532467532	0.14801657785672	0.135363790186125	0.119983948635634	0.144563918757467	0.115628496829541	0.160206718346253	0.129059829059829	0.118359739049394	0.146491228070175	0.137479541734861	0.131904761904762	0.124492557510149
C3001_8_CD	0.24092970521542	0.33160237388724	0.249332621462894	0.250722125938764	0.304576144036009	0.31473771856786	0.30256012412723	1	0.196324143692565	0.157287157287157	0.13448275862069	0.128503437334744	0.125347084490282	0.146399055489965	0.149128469980633	0.128273650454303	0.138327205882353	0.116071428571429	0.132286995515695	0.158450704225352	0.153022670025189	0.132743362831858	0.163094615786722	0.147444595205789	0.140112089671737	0.10200364298725	0.0983890954151177	0.109752547307132	0.118316268486917	0.108513708513709	0.0985576923076923	0.100690448791715	0.0858267716535433	0.0844221105527638	0.166793602437167	0.105130361648444	0.117333333333333	0.105545617173524	0.0979498861047836	0.112664473684211	0.124692874692875	0.104103343465046	0.130298273155416	0.113675958188153	0.117234468937876	0.120017714791851	0.108597285067873	0.109390125847047	0.0945454545454545
C3001_9_CD	0.287309266840342	0.197265625	0.309869375907112	0.237391930835735	0.211840515505437	0.161908646003263	0.2002442002442	0.196324143692565	1	0.128829536527887	0.120722798923491	0.137700534759358	0.1835734870317	0.138199858256556	0.120911429621463	0.15748031496063	0.163664596273292	0.162850527399022	0.161260709914321	0.144671841919548	0.124773304316286	0.173463526708788	0.14477563052735	0.154335961188599	0.178591871780195	0.147592245153221	0.154952400243063	0.147437344773086	0.129282655246253	0.172247706422018	0.135546334716459	0.13826222917132	0.127713920817369	0.246545454545455	0.117670522536897	0.134458672875437	0.119800332778702	0.113725490196078	0.142959256611866	0.123798756359525	0.104738154613466	0.11927097292951	0.136137793971514	0.135608308605341	0.074808472284813	0.178349875930521	0.176907094093203	0.167486070140937	0.168732125834128
C3002_1_CD	0.128850102669405	0.169041450777202	0.132530120481928	0.151402858655373	0.173038229376258	0.143988480921526	0.17128987517337	0.157287157287157	0.128829536527887	1	0.364385820280297	0.385012919896641	0.287070524412297	0.387348969438522	0.396255850234009	0.349236641221374	0.118758434547908	0.0969044414535666	0.103613408794079	0.140885566417481	0.15423197492163	0.0844205679201842	0.133942161339422	0.116615519508987	0.105609284332689	0.0690002518257366	0.0667627281460134	0.0796610169491525	0.0959259259259259	0.0990296803652968	0.0871886120996441	0.0900824097755044	0.078416149068323	0.0905432595573441	0.116582186821144	0.08559670781893	0.0884177869700103	0.088785046728972	0.0955342001130582	0.0894504612916165	0.12187690432663	0.0788013318534961	0.103763987792472	0.0979469632164243	0.0911736178467507	0.0859709153122327	0.082	0.0787253983130272	0.0737122557726465
C3002_2_CD	0.13188479029813	0.160276555625393	0.128895184135977	0.157784743991641	0.157826649417853	0.13588850174216	0.187371310912835	0.13448275862069	0.120722798923491	0.364385820280297	1	0.366479049405879	0.26555652936021	0.383067314365024	0.389226100151745	0.373570520965692	0.117101193106496	0.0959495351925631	0.0989761092150171	0.137640449438202	0.159581022797289	0.0859848484848485	0.136295556665003	0.119861531804414	0.111153698735148	0.0768844221105528	0.0799807275355336	0.0893965031020869	0.112347052280311	0.120967741935484	0.106236944195762	0.106449771689498	0.12156862745098	0.112846347607053	0.118727915194346	0.0894672631150874	0.102774922918808	0.108202443280977	0.116817155756208	0.0897233201581028	0.12090530077427	0.0772313296903461	0.111613876319759	0.103681760473974	0.077634011090573	0.102093122597181	0.0940239043824701	0.0943484353106025	0.0943480195816644
C3002_3_CD	0.139933166248956	0.184077079107505	0.146953405017921	0.162440911044263	0.152756702073849	0.133155080213904	0.18031914893617	0.128503437334744	0.137700534759358	0.385012919896641	0.366479049405879	1	0.393151815181518	0.429723502304147	0.40012070006035	0.376427829698858	0.141505864547862	0.118323989377397	0.120248538011696	0.145852324521422	0.164538310412574	0.111994698475812	0.15545340576682	0.146423248882265	0.128580946035976	0.0944304377721751	0.0889180902321507	0.103448275862069	0.113629109479732	0.121895006402049	0.112407211028632	0.112640163098879	0.0878684807256236	0.102124183006536	0.111587982832618	0.109243697478992	0.101128290848308	0.0986691142726021	0.0968888888888889	0.101459110960299	0.130123927550048	0.0932741116751269	0.114781172584641	0.112028725314183	0.0615779345734445	0.107142857142857	0.0954961056552658	0.0871401151631478	0.085419734904271
C3002_4_CD	0.174940089010613	0.152503793626707	0.197126628800535	0.169526424159231	0.147364370911889	0.111023622047244	0.149940968122786	0.125347084490282	0.1835734870317	0.287070524412297	0.26555652936021	0.393151815181518	1	0.353591160220994	0.336427939876216	0.308622707764339	0.142155357691127	0.133451059535822	0.135623869801085	0.140375753278979	0.133480825958702	0.13506711409396	0.142292490118577	0.138897258210304	0.161555934128336	0.114774114774115	0.116466653551053	0.117621047977006	0.108994708994709	0.15624289288151	0.127502876869965	0.131978561857972	0.0593939393939394	0.112164813603663	0.105137395459976	0.118462872002311	0.099835255354201	0.0928016937191249	0.111461619348055	0.121237932992618	0.122717311906501	0.108173076923077	0.126075446724024	0.134667064795461	0.0621621621621622	0.124627310673822	0.123858447488584	0.109193598995921	0.107706310679612
C3002_5_CD	0.172907998150717	0.17103825136612	0.174311926605505	0.196097096620657	0.182436260623229	0.149761336515513	0.195870206489676	0.146399055489965	0.138199858256556	0.387348969438522	0.383067314365024	0.429723502304147	0.353591160220994	1	0.429147078576226	0.41240666283745	0.144187930336169	0.114276865902756	0.123143080531665	0.167420814479638	0.17466307277628	0.102823283373998	0.148660714285714	0.140316205533597	0.138582116138226	0.0873072360616845	0.0905772302076203	0.101986754966887	0.114227779655289	0.143286026200873	0.131393048883865	0.126585695006748	0.0807259073842303	0.128828828828829	0.131848284166165	0.105087263275158	0.0945340501792115	0.112683173319859	0.143144148669011	0.11950146627566	0.145636172450053	0.108688245315162	0.14572864321608	0.130350194552529	0.0991735537190083	0.132677165354331	0.12620281273131	0.127241673783091	0.119869971556278
C3002_6_CD	0.121870571563533	0.177764565992866	0.138863841298467	0.140708393983503	0.161037394451146	0.146848602988954	0.173694147262429	0.149128469980633	0.120911429621463	0.396255850234009	0.389226100151745	0.40012070006035	0.336427939876216	0.429147078576226	1	0.375449101796407	0.136092150170648	0.100224143451809	0.123963515754561	0.17200217037439	0.163877668782458	0.0928285402257008	0.160250240615977	0.12893864013267	0.135479041916168	0.0865077414598181	0.0883808625972189	0.0989554700384827	0.103096410978184	0.116440255059606	0.10370583165757	0.105843439911797	0.0830449826989619	0.0902325581395349	0.117761873780091	0.0860671555384022	0.0924329501915709	0.0805084745762712	0.0902527075812274	0.118762088974855	0.141482739105829	0.0849122807017544	0.120879120879121	0.133471074380165	0.0796680497925311	0.0846983619656412	0.0855312735493595	0.0759878419452888	0.0670505964623612
C3002_7_CD	0.193121693121693	0.156578289144572	0.172343044727124	0.245703669298653	0.142857142857143	0.11311736590547	0.161904761904762	0.128273650454303	0.15748031496063	0.349236641221374	0.373570520965692	0.376427829698858	0.308622707764339	0.41240666283745	0.375449101796407	1	0.118416137467314	0.106964443138407	0.0989884393063584	0.13021778584392	0.135945815191098	0.0920707732634338	0.132122213047069	0.116228070175439	0.114976805831677	0.0802455103432598	0.084118291347207	0.0898791540785498	0.111610006414368	0.143531881395959	0.116073816528484	0.123092836824412	0.0784982935153584	0.199551569506726	0.0963081861958267	0.100805040252013	0.0928870292887029	0.113145539906103	0.220668996505242	0.0906937394247039	0.110690633869442	0.0911699075549888	0.117278797996661	0.103770197486535	0.0666666666666667	0.171538461538462	0.160404624277457	0.164593698175788	0.176588897827836
C3003_2_UC	0.150561797752809	0.17353198948291	0.171573973100691	0.132664437012263	0.18001800180018	0.169596199524941	0.160851835070231	0.138327205882353	0.163664596273292	0.118758434547908	0.117101193106496	0.141505864547862	0.142155357691127	0.144187930336169	0.136092150170648	0.118416137467314	1	0.408177172061329	0.414107883817427	0.416460089241448	0.196649029982363	0.196313065976714	0.2	0.205923836389281	0.196216736133376	0.192451071761417	0.182424916573971	0.181726654920715	0.173300673606859	0.194739504299444	0.185117493472585	0.194268323611463	0.0791984732824427	0.0911374237531396	0.164416586306654	0.139935064935065	0.132319391634981	0.130057803468208	0.141291108404385	0.214140730717185	0.191395961369622	0.193761814744802	0.192865542924343	0.181318681318681	0.0823401950162514	0.149208487706298	0.142036386849665	0.154965441978901	0.108827493261456
C3003_3_UC	0.141966141966142	0.14007267922035	0.145970748494408	0.115946261682243	0.171093480510521	0.139485734413526	0.127450980392157	0.116071428571429	0.162850527399022	0.0969044414535666	0.0959495351925631	0.118323989377397	0.133451059535822	0.114276865902756	0.100224143451809	0.106964443138407	0.408177172061329	1	0.405850706119704	0.325785244704164	0.155783891282731	0.187151579506238	0.162324049116502	0.18546791065875	0.171391417425228	0.208658186294625	0.199842333464722	0.179974104445404	0.167300380228137	0.209993396434074	0.195588566284042	0.219034912163665	0.0585978374607604	0.0786199095022624	0.129695251594614	0.136641018837888	0.121375186846039	0.117834394904459	0.14140127388535	0.224936815501264	0.161558960692871	0.237991858887381	0.188044831880448	0.167036011080332	0.0682343870470316	0.165738161559889	0.141994750656168	0.164258330875848	0.107960741548528
C3003_5_UC	0.150018429782529	0.156064461407973	0.173242467718795	0.113268608414239	0.18141592920354	0.154022988505747	0.14373356704645	0.132286995515695	0.161260709914321	0.103613408794079	0.0989761092150171	0.120248538011696	0.135623869801085	0.123143080531665	0.123963515754561	0.0989884393063584	0.414107883817427	0.405850706119704	1	0.374822527212494	0.166385135135135	0.18688628444726	0.172798216276477	0.188078108941418	0.182415519399249	0.189500345383376	0.180237676056338	0.169955599407992	0.151677055506085	0.201409869083585	0.186190845616757	0.202173363659338	0.0528714676390155	0.0740611961057024	0.153089887640449	0.14216944801027	0.128683327116747	0.121627064035441	0.128255722178374	0.209511140671766	0.176821474222412	0.191614906832298	0.19159599074788	0.17480633209835	0.0779768177028451	0.142668428005284	0.142407057340895	0.153956319369853	0.0922473012757605
C3003_7_UC	0.159819413092551	0.191780821917808	0.154499151103565	0.143306379155436	0.215720022948939	0.18871359223301	0.178591871780195	0.158450704225352	0.144671841919548	0.140885566417481	0.137640449438202	0.145852324521422	0.140375753278979	0.167420814479638	0.17200217037439	0.13021778584392	0.416460089241448	0.325785244704164	0.374822527212494	1	0.200325732899023	0.155459146782357	0.188412408759124	0.193047034764826	0.182417582417582	0.161590737477976	0.159797541576283	0.158971523361902	0.162766329025498	0.180369127516779	0.175990675990676	0.174204355108878	0.0784794604537094	0.0963282937365011	0.192019950124688	0.119464086341645	0.119402985074627	0.122613065326633	0.150548354935194	0.197981366459627	0.209518599562363	0.177777777777778	0.200945626477541	0.179991964644436	0.107407407407407	0.141231855629659	0.138888888888889	0.151724137931034	0.105033690051526
C3004_1_UC	0.130475302889096	0.183459522422831	0.143808255659121	0.145992366412214	0.172004744958482	0.168597168597169	0.195258889582034	0.153022670025189	0.124773304316286	0.15423197492163	0.159581022797289	0.164538310412574	0.133480825958702	0.17466307277628	0.163877668782458	0.135945815191098	0.196649029982363	0.155783891282731	0.166385135135135	0.200325732899023	1	0.248670756646217	0.389390519187359	0.336867469879518	0.28381190178943	0.143441575044746	0.13545719844358	0.155206847360913	0.178690344062153	0.162817222697462	0.143990596532471	0.138733183856502	0.0933694181326116	0.102670349907919	0.185656836461126	0.116523772408418	0.120076849183477	0.1152	0.129368805425143	0.132794457274827	0.175667993177942	0.126119670369043	0.15185007208073	0.14696223316913	0.0974025974025974	0.122564935064935	0.113135914958238	0.113606340819022	0.100249584026622
C3004_3_UC	0.138518024032043	0.139350453172205	0.189712758851035	0.112315270935961	0.13928434013082	0.136769480519481	0.151190476190476	0.132743362831858	0.173463526708788	0.0844205679201842	0.0859848484848485	0.111994698475812	0.13506711409396	0.102823283373998	0.0928285402257008	0.0920707732634338	0.196313065976714	0.187151579506238	0.18688628444726	0.155459146782357	0.248670756646217	1	0.320689655172414	0.327330508474576	0.311633902674831	0.193569553805774	0.163374485596708	0.169066418950302	0.1563626282229	0.166052510363888	0.14992927864215	0.156736938588451	0.0599022004889976	0.0740387670797585	0.131470829909614	0.186440677966102	0.161414565826331	0.117732558139535	0.099092812281926	0.152920457880834	0.124907885040531	0.144441364014416	0.150731541340592	0.137225398736082	0.064207650273224	0.154509079716836	0.124928202182654	0.124839948783611	0.101334951456311
C3004_4_UC	0.134808853118712	0.179387457462324	0.165555119654767	0.1338199513382	0.158357771260997	0.146860404774261	0.190721649484536	0.163094615786722	0.14477563052735	0.133942161339422	0.136295556665003	0.15545340576682	0.142292490118577	0.148660714285714	0.160250240615977	0.132122213047069	0.2	0.162324049116502	0.172798216276477	0.188412408759124	0.389390519187359	0.320689655172414	1	0.393139841688654	0.361111111111111	0.169992786727579	0.14989779695662	0.169518294287971	0.179183135704875	0.163977095262884	0.150563607085346	0.152275077559462	0.0829741379310345	0.0967361384191899	0.165409482758621	0.149964714184898	0.145378151260504	0.116352201257862	0.103968938740293	0.142026009582478	0.151543498596819	0.131116085705149	0.165344467640919	0.152983725135624	0.0797773654916512	0.128974633797785	0.11760752688172	0.112252663622527	0.0919870643190801
C3004_5_UC	0.140568099053168	0.171086398631309	0.169159544159544	0.135549872122762	0.14664386489953	0.145322434150772	0.181613339342046	0.147444595205789	0.154335961188599	0.116615519508987	0.119861531804414	0.146423248882265	0.138897258210304	0.140316205533597	0.12893864013267	0.116228070175439	0.205923836389281	0.18546791065875	0.188078108941418	0.193047034764826	0.336867469879518	0.327330508474576	0.393139841688654	1	0.351997146932953	0.197779319916724	0.176663747810858	0.190833959429001	0.206447613143211	0.187096774193548	0.163420187199595	0.169159107624418	0.0735090152565881	0.0919014084507042	0.161426560300328	0.16470971950424	0.141247182569497	0.131014961585119	0.114518633540373	0.159517000317763	0.153430353430353	0.154815481548155	0.162607718246534	0.166666666666667	0.0791819611955952	0.144741180349489	0.137585991244528	0.132703081232493	0.108868299139643
C3004_6_UC	0.167910447761194	0.157555049354594	0.20160481444333	0.149243697478992	0.154706790123457	0.135016025641026	0.161124307205067	0.140112089671737	0.178591871780195	0.105609284332689	0.111153698735148	0.128580946035976	0.161555934128336	0.138582116138226	0.135479041916168	0.114976805831677	0.196216736133376	0.171391417425228	0.182415519399249	0.182417582417582	0.28381190178943	0.311633902674831	0.361111111111111	0.351997146932953	1	0.203464152598114	0.191783693146091	0.201612903225806	0.192002268859898	0.214251668255481	0.173798709060483	0.173481173481173	0.0634087237479806	0.102423263327948	0.157938487115544	0.161579892280072	0.14066757493188	0.122021660649819	0.113365990202939	0.167797109997051	0.16195856873823	0.15076071922545	0.187065368567455	0.20448798988622	0.0763289413902771	0.145322434150772	0.15097639172253	0.135810377962844	0.11919315403423
C3005_2_UC	0.131942816967424	0.122753733232093	0.144268320698369	0.11585790573485	0.123076923076923	0.111696522655427	0.115702479338843	0.10200364298725	0.147592245153221	0.0690002518257366	0.0768844221105528	0.0944304377721751	0.114774114774115	0.0873072360616845	0.0865077414598181	0.0802455103432598	0.192451071761417	0.208658186294625	0.189500345383376	0.161590737477976	0.143441575044746	0.193569553805774	0.169992786727579	0.197779319916724	0.203464152598114	1	0.39314555840063	0.403741570589515	0.333810546408972	0.223942598187311	0.192613636363636	0.216974030861874	0.0515302118754905	0.0745633676668159	0.11369095276221	0.169329782512206	0.148678146980354	0.123469132716821	0.0991099350493144	0.170790453251587	0.129292929292929	0.172479391249207	0.154086538461538	0.161045342863525	0.0521008403361345	0.133771929824561	0.149504523912107	0.142691684039842	0.0926206448820602
C3005_3_UC	0.135531962954597	0.122879301987397	0.138522427440633	0.12300785634119	0.124846399606783	0.111474584801208	0.109555391795628	0.0983890954151177	0.154952400243063	0.0667627281460134	0.0799807275355336	0.0889180902321507	0.116466653551053	0.0905772302076203	0.0883808625972189	0.084118291347207	0.182424916573971	0.199842333464722	0.180237676056338	0.159797541576283	0.13545719844358	0.163374485596708	0.14989779695662	0.176663747810858	0.191783693146091	0.39314555840063	1	0.442516268980477	0.355269320843091	0.237080940914984	0.19528805448187	0.21009624114763	0.0592815875408189	0.0901156447741654	0.115080377647359	0.147837043259135	0.121136363636364	0.10686482661005	0.0986629783310281	0.193798449612403	0.143802057814797	0.203435994133669	0.163678696158324	0.186757589089309	0.0566693397487303	0.136113463166808	0.169025987745616	0.150224215246637	0.117596932253941
C3005_5_UC	0.127686796315251	0.137471655328798	0.142928786359077	0.135492227979275	0.127350427350427	0.125704120960569	0.124675324675325	0.109752547307132	0.147437344773086	0.0796610169491525	0.0893965031020869	0.103448275862069	0.117621047977006	0.101986754966887	0.0989554700384827	0.0898791540785498	0.181726654920715	0.179974104445404	0.169955599407992	0.158971523361902	0.155206847360913	0.169066418950302	0.169518294287971	0.190833959429001	0.201612903225806	0.403741570589515	0.442516268980477	1	0.426953880143607	0.207453168593065	0.18117836316107	0.18882769472856	0.0654620853080569	0.085048351103397	0.124775044991002	0.16044061302682	0.13829506466086	0.115310873733224	0.0950871632329636	0.162966461974492	0.149957398466345	0.172808422980087	0.15149921094161	0.176108374384236	0.0591039084842707	0.132124970188409	0.160368445914029	0.143509127789047	0.110151187904968
C3005_6_UC	0.12579415501906	0.145038167938931	0.131699846860643	0.146206447411267	0.133333333333333	0.138533178114086	0.138461538461538	0.118316268486917	0.129282655246253	0.0959259259259259	0.112347052280311	0.113629109479732	0.108994708994709	0.114227779655289	0.103096410978184	0.111610006414368	0.173300673606859	0.167300380228137	0.151677055506085	0.162766329025498	0.178690344062153	0.1563626282229	0.179183135704875	0.206447613143211	0.192002268859898	0.333810546408972	0.355269320843091	0.426953880143607	1	0.194757415497816	0.167793055231881	0.172437202987101	0.0840602696272799	0.098155673648015	0.147912524850895	0.168377823408624	0.156166219839142	0.14566226347733	0.113636363636364	0.138810992708918	0.154347826086957	0.157880434782609	0.140123256568278	0.155686853766617	0.0748476936466493	0.143025309005297	0.136044880785414	0.129801734820322	0.1136430896715
C3006_1_UC	0.178220451527224	0.139554553143502	0.177663671373556	0.174966711051931	0.152023121387283	0.129279811097993	0.149297423887588	0.108513708513709	0.172247706422018	0.0990296803652968	0.120967741935484	0.121895006402049	0.15624289288151	0.143286026200873	0.116440255059606	0.143531881395959	0.194739504299444	0.209993396434074	0.201409869083585	0.180369127516779	0.162817222697462	0.166052510363888	0.163977095262884	0.187096774193548	0.214251668255481	0.223942598187311	0.237080940914984	0.207453168593065	0.194757415497816	1	0.377596266044341	0.379600181735575	0.0556040756914119	0.121721415839063	0.13279376498801	0.133984647592463	0.111054247697032	0.120491803278689	0.161981630949068	0.211298606016141	0.160170697012802	0.204816460135609	0.190116122063192	0.196811160936721	0.0659480025364616	0.168583312943479	0.183712574850299	0.177126556016598	0.165206508135169
C3006_2_UC	0.138762389499062	0.124817731116944	0.142486374253828	0.142123750337747	0.142127403846154	0.129692832764505	0.137082066869301	0.0985576923076923	0.135546334716459	0.0871886120996441	0.106236944195762	0.112407211028632	0.127502876869965	0.131393048883865	0.10370583165757	0.116073816528484	0.185117493472585	0.195588566284042	0.186190845616757	0.175990675990676	0.143990596532471	0.14992927864215	0.150563607085346	0.163420187199595	0.173798709060483	0.192613636363636	0.19528805448187	0.18117836316107	0.167793055231881	0.377596266044341	1	0.431558473133965	0.0484460694698355	0.0814966683751922	0.127706306871666	0.130392865750783	0.114178504422407	0.1125	0.145564168819983	0.217879948914432	0.160011918951132	0.203196899975781	0.184956497333708	0.16700353713997	0.0700572583361401	0.152648757218177	0.156295576081672	0.16044776119403	0.12964366944655
C3006_4_UC	0.148908523908524	0.126748740906547	0.141003244322436	0.138529259451062	0.144380403458213	0.120882352941176	0.135927969793784	0.100690448791715	0.13826222917132	0.0900824097755044	0.106449771689498	0.112640163098879	0.131978561857972	0.126585695006748	0.105843439911797	0.123092836824412	0.194268323611463	0.219034912163665	0.202173363659338	0.174204355108878	0.138733183856502	0.156736938588451	0.152275077559462	0.169159107624418	0.173481173481173	0.216974030861874	0.21009624114763	0.18882769472856	0.172437202987101	0.379600181735575	0.431558473133965	1	0.0503199534613147	0.0847541388682975	0.12291169451074	0.14622641509434	0.130060067902847	0.125619834710744	0.146321300633783	0.220766378244747	0.150014152278517	0.203560552822675	0.193802663767328	0.161532864419112	0.0632147395171537	0.160936356986101	0.163400236127509	0.168086754453912	0.124303368063969
C3007_1_CD	0.0681818181818182	0.0941828254847645	0.0566882148184983	0.0779436152570481	0.0839260312944523	0.0825396825396825	0.115853658536585	0.0858267716535433	0.127713920817369	0.078416149068323	0.12156862745098	0.0878684807256236	0.0593939393939394	0.0807259073842303	0.0830449826989619	0.0784982935153584	0.0791984732824427	0.0585978374607604	0.0528714676390155	0.0784794604537094	0.0933694181326116	0.0599022004889976	0.0829741379310345	0.0735090152565881	0.0634087237479806	0.0515302118754905	0.0592815875408189	0.0654620853080569	0.0840602696272799	0.0556040756914119	0.0484460694698355	0.0503199534613147	1	0.208333333333333	0.0911350455675228	0.0644022937803264	0.0724472333143183	0.0804218852999341	0.0633147113594041	0.0461990760184796	0.0701986754966887	0.0519937451133698	0.0570652173913043	0.0587703435804702	0.0663507109004739	0.0693160813308688	0.0571184995737425	0.0553861788617886	0.065597667638484
C3007_2_CD	0.184086021505376	0.0972093023255814	0.140164899882214	0.220483005366726	0.0971891376846117	0.0801411290322581	0.112599206349206	0.0844221105527638	0.246545454545455	0.0905432595573441	0.112846347607053	0.102124183006536	0.112164813603663	0.128828828828829	0.0902325581395349	0.199551569506726	0.0911374237531396	0.0786199095022624	0.0740611961057024	0.0963282937365011	0.102670349907919	0.0740387670797585	0.0967361384191899	0.0919014084507042	0.102423263327948	0.0745633676668159	0.0901156447741654	0.085048351103397	0.098155673648015	0.121721415839063	0.0814966683751922	0.0847541388682975	0.208333333333333	1	0.0928050052137643	0.0791075050709939	0.0687299035369775	0.100090991810737	0.208535402521823	0.0606552059682128	0.0691964285714286	0.0670356703567036	0.0848267622461171	0.0863209189001044	0.0467581047381546	0.168051359516616	0.181653372008702	0.179190751445087	0.255067567567568
C3007_4_CD	0.1344	0.163087248322148	0.134462151394422	0.145424836601307	0.181818181818182	0.187010954616588	0.170043415340087	0.166793602437167	0.117670522536897	0.116582186821144	0.118727915194346	0.111587982832618	0.105137395459976	0.131848284166165	0.117761873780091	0.0963081861958267	0.164416586306654	0.129695251594614	0.153089887640449	0.192019950124688	0.185656836461126	0.131470829909614	0.165409482758621	0.161426560300328	0.157938487115544	0.11369095276221	0.115080377647359	0.124775044991002	0.147912524850895	0.13279376498801	0.127706306871666	0.12291169451074	0.0911350455675228	0.0928050052137643	1	0.112749349522984	0.126315789473684	0.121401752190238	0.125452352231604	0.146077156480277	0.180907877169559	0.135782747603834	0.164261931187569	0.150299677270632	0.140845070422535	0.136866359447005	0.134913793103448	0.143589743589744	0.101925786754345
C3008_1_CD	0.129292221443588	0.136144578313253	0.146838885112169	0.127202255109232	0.119047619047619	0.110497237569061	0.127597672485453	0.105130361648444	0.134458672875437	0.08559670781893	0.0894672631150874	0.109243697478992	0.118462872002311	0.105087263275158	0.0860671555384022	0.100805040252013	0.139935064935065	0.136641018837888	0.14216944801027	0.119464086341645	0.116523772408418	0.186440677966102	0.149964714184898	0.16470971950424	0.161579892280072	0.169329782512206	0.147837043259135	0.16044061302682	0.168377823408624	0.133984647592463	0.130392865750783	0.14622641509434	0.0644022937803264	0.0791075050709939	0.112749349522984	1	0.404398563734291	0.275618374558304	0.0978502594514455	0.111771700356718	0.104897801774007	0.115199547127087	0.127426756088952	0.128890286073562	0.0638613861386139	0.16437908496732	0.125565952309085	0.127075567604202	0.0993292877674864
C3008_3_CD	0.116645911166459	0.132149901380671	0.123813291139241	0.109446525176862	0.118881118881119	0.114086770219604	0.132467532467532	0.117333333333333	0.119800332778702	0.0884177869700103	0.102774922918808	0.101128290848308	0.099835255354201	0.0945340501792115	0.0924329501915709	0.0928870292887029	0.132319391634981	0.121375186846039	0.128683327116747	0.119402985074627	0.120076849183477	0.161414565826331	0.145378151260504	0.141247182569497	0.14066757493188	0.148678146980354	0.121136363636364	0.13829506466086	0.156166219839142	0.111054247697032	0.114178504422407	0.130060067902847	0.0724472333143183	0.0687299035369775	0.126315789473684	0.404398563734291	1	0.332013574660633	0.0921762589928058	0.0975359342915811	0.0979284369114878	0.0972624798711755	0.116191275167785	0.109579100145138	0.0716180371352785	0.157372039724981	0.0997935306262904	0.114080574391703	0.0834264432029795
C3008_4_CD	0.127013345605154	0.132231404958678	0.134380453752181	0.130009319664492	0.127467569091935	0.110507246376812	0.14801657785672	0.105545617173524	0.113725490196078	0.088785046728972	0.108202443280977	0.0986691142726021	0.0928016937191249	0.112683173319859	0.0805084745762712	0.113145539906103	0.130057803468208	0.117834394904459	0.121627064035441	0.122613065326633	0.1152	0.117732558139535	0.116352201257862	0.131014961585119	0.122021660649819	0.123469132716821	0.10686482661005	0.115310873733224	0.14566226347733	0.120491803278689	0.1125	0.125619834710744	0.0804218852999341	0.100090991810737	0.121401752190238	0.275618374558304	0.332013574660633	1	0.136623376623377	0.0944649446494465	0.0999473961073119	0.097020097020097	0.121408711770158	0.108182533438238	0.076742364917776	0.148209139563606	0.112156567557396	0.128205128205128	0.112130054189246
E5001_1_CD	0.218840579710145	0.116998950682057	0.163114397564158	0.237741456166419	0.155518394648829	0.114152591729761	0.135363790186125	0.0979498861047836	0.142959256611866	0.0955342001130582	0.116817155756208	0.0968888888888889	0.111461619348055	0.143144148669011	0.0902527075812274	0.220668996505242	0.141291108404385	0.14140127388535	0.128255722178374	0.150548354935194	0.129368805425143	0.099092812281926	0.103968938740293	0.114518633540373	0.113365990202939	0.0991099350493144	0.0986629783310281	0.0950871632329636	0.113636363636364	0.161981630949068	0.145564168819983	0.146321300633783	0.0633147113594041	0.208535402521823	0.125452352231604	0.0978502594514455	0.0921762589928058	0.136623376623377	1	0.218436873747495	0.228717366628831	0.209406494960806	0.250752256770311	0.179518563851489	0.148177496038035	0.22089552238806	0.205812101910828	0.24160756501182	0.242973708068903
E5001_2_CD	0.144590846047157	0.129370629370629	0.140403039312851	0.113111413043478	0.156592292089249	0.139288738357324	0.119983948635634	0.112664473684211	0.123798756359525	0.0894504612916165	0.0897233201581028	0.101459110960299	0.121237932992618	0.11950146627566	0.118762088974855	0.0906937394247039	0.214140730717185	0.224936815501264	0.209511140671766	0.197981366459627	0.132794457274827	0.152920457880834	0.142026009582478	0.159517000317763	0.167797109997051	0.170790453251587	0.193798449612403	0.162966461974492	0.138810992708918	0.211298606016141	0.217879948914432	0.220766378244747	0.0461990760184796	0.0606552059682128	0.146077156480277	0.111771700356718	0.0975359342915811	0.0944649446494465	0.218436873747495	1	0.320323014804845	0.391756148250779	0.361631294215564	0.302911931818182	0.127024291497976	0.158078880407125	0.173913043478261	0.180305131761442	0.12567956507835
E5001_3_CD	0.134174848059841	0.150622876557191	0.123855211513301	0.142721217887726	0.171310017783047	0.16038338658147	0.144563918757467	0.124692874692875	0.104738154613466	0.12187690432663	0.12090530077427	0.130123927550048	0.122717311906501	0.145636172450053	0.141482739105829	0.110690633869442	0.191395961369622	0.161558960692871	0.176821474222412	0.209518599562363	0.175667993177942	0.124907885040531	0.151543498596819	0.153430353430353	0.16195856873823	0.129292929292929	0.143802057814797	0.149957398466345	0.154347826086957	0.160170697012802	0.160011918951132	0.150014152278517	0.0701986754966887	0.0691964285714286	0.180907877169559	0.104897801774007	0.0979284369114878	0.0999473961073119	0.228717366628831	0.320323014804845	1	0.289171452009844	0.333147942157953	0.292321924144311	0.16551724137931	0.146766169154229	0.152062868369352	0.161690399632522	0.120288013553579
E5001_4_CD	0.144491663942465	0.125316914161536	0.121277249002149	0.120528520786336	0.140560747663551	0.125778816199377	0.115628496829541	0.104103343465046	0.11927097292951	0.0788013318534961	0.0772313296903461	0.0932741116751269	0.108173076923077	0.108688245315162	0.0849122807017544	0.0911699075549888	0.193761814744802	0.237991858887381	0.191614906832298	0.177777777777778	0.126119670369043	0.144441364014416	0.131116085705149	0.154815481548155	0.15076071922545	0.172479391249207	0.203435994133669	0.172808422980087	0.157880434782609	0.204816460135609	0.203196899975781	0.203560552822675	0.0519937451133698	0.0670356703567036	0.135782747603834	0.115199547127087	0.0972624798711755	0.097020097020097	0.209406494960806	0.391756148250779	0.289171452009844	1	0.326709973251815	0.266034031413613	0.112792297111417	0.174617737003058	0.177836566725456	0.182026894063627	0.130355515041021
E5001_7_CD	0.177853783668234	0.15283203125	0.16379655586704	0.146515533165407	0.194919647485744	0.15260612573885	0.160206718346253	0.130298273155416	0.136137793971514	0.103763987792472	0.111613876319759	0.114781172584641	0.126075446724024	0.14572864321608	0.120879120879121	0.117278797996661	0.192865542924343	0.188044831880448	0.19159599074788	0.200945626477541	0.15185007208073	0.150731541340592	0.165344467640919	0.162607718246534	0.187065368567455	0.154086538461538	0.163678696158324	0.15149921094161	0.140123256568278	0.190116122063192	0.184956497333708	0.193802663767328	0.0570652173913043	0.0848267622461171	0.164261931187569	0.127426756088952	0.116191275167785	0.121408711770158	0.250752256770311	0.361631294215564	0.333147942157953	0.326709973251815	1	0.31218487394958	0.166551006245663	0.171461014383043	0.179811866859624	0.193319415448852	0.134248665141114
E5001_8_CD	0.155848918225156	0.140612076095947	0.150470219435737	0.145787545787546	0.149787234042553	0.131789848619768	0.129059829059829	0.113675958188153	0.135608308605341	0.0979469632164243	0.103681760473974	0.112028725314183	0.134667064795461	0.130350194552529	0.133471074380165	0.103770197486535	0.181318681318681	0.167036011080332	0.17480633209835	0.179991964644436	0.14696223316913	0.137225398736082	0.152983725135624	0.166666666666667	0.20448798988622	0.161045342863525	0.186757589089309	0.176108374384236	0.155686853766617	0.196811160936721	0.16700353713997	0.161532864419112	0.0587703435804702	0.0863209189001044	0.150299677270632	0.128890286073562	0.109579100145138	0.108182533438238	0.179518563851489	0.302911931818182	0.292321924144311	0.266034031413613	0.31218487394958	1	0.128734383487235	0.149062191510365	0.1690635985938	0.148148148148148	0.137314439946019
E5001_9_CD	0.0933503836317136	0.112426035502959	0.0883040935672515	0.0962288686605982	0.154903758020165	0.12589559877175	0.118359739049394	0.117234468937876	0.074808472284813	0.0911736178467507	0.077634011090573	0.0615779345734445	0.0621621621621622	0.0991735537190083	0.0796680497925311	0.0666666666666667	0.0823401950162514	0.0682343870470316	0.0779768177028451	0.107407407407407	0.0974025974025974	0.064207650273224	0.0797773654916512	0.0791819611955952	0.0763289413902771	0.0521008403361345	0.0566693397487303	0.0591039084842707	0.0748476936466493	0.0659480025364616	0.0700572583361401	0.0632147395171537	0.0663507109004739	0.0467581047381546	0.140845070422535	0.0638613861386139	0.0716180371352785	0.076742364917776	0.148177496038035	0.127024291497976	0.16551724137931	0.112792297111417	0.166551006245663	0.128734383487235	1	0.0829371368198627	0.0804485616772306	0.0895432692307692	0.0764508928571429
E5002_2_non	0.213675213675214	0.1375	0.187454677302393	0.22626582278481	0.152586206896552	0.140136054421769	0.146491228070175	0.120017714791851	0.178349875930521	0.0859709153122327	0.102093122597181	0.107142857142857	0.124627310673822	0.132677165354331	0.0846983619656412	0.171538461538462	0.149208487706298	0.165738161559889	0.142668428005284	0.141231855629659	0.122564935064935	0.154509079716836	0.128974633797785	0.144741180349489	0.145322434150772	0.133771929824561	0.136113463166808	0.132124970188409	0.143025309005297	0.168583312943479	0.152648757218177	0.160936356986101	0.0693160813308688	0.168051359516616	0.136866359447005	0.16437908496732	0.157372039724981	0.148209139563606	0.22089552238806	0.158078880407125	0.146766169154229	0.174617737003058	0.171461014383043	0.149062191510365	0.0829371368198627	1	0.360059947545897	0.367372881355932	0.282808902532617
E5002_3_non	0.233595800524934	0.129044834307992	0.192307692307692	0.230595327807084	0.150729335494327	0.129848229342327	0.137479541734861	0.108597285067873	0.176907094093203	0.082	0.0940239043824701	0.0954961056552658	0.123858447488584	0.12620281273131	0.0855312735493595	0.160404624277457	0.142036386849665	0.141994750656168	0.142407057340895	0.138888888888889	0.113135914958238	0.124928202182654	0.11760752688172	0.137585991244528	0.15097639172253	0.149504523912107	0.169025987745616	0.160368445914029	0.136044880785414	0.183712574850299	0.156295576081672	0.163400236127509	0.0571184995737425	0.181653372008702	0.134913793103448	0.125565952309085	0.0997935306262904	0.112156567557396	0.205812101910828	0.173913043478261	0.152062868369352	0.177836566725456	0.179811866859624	0.1690635985938	0.0804485616772306	0.360059947545897	1	0.424433249370277	0.293402137854773
E5002_4_non	0.231655290102389	0.128054298642534	0.176151761517615	0.22298163178129	0.158269961977186	0.157600406710727	0.131904761904762	0.109390125847047	0.167486070140937	0.0787253983130272	0.0943484353106025	0.0871401151631478	0.109193598995921	0.127241673783091	0.0759878419452888	0.164593698175788	0.154965441978901	0.164258330875848	0.153956319369853	0.151724137931034	0.113606340819022	0.124839948783611	0.112252663622527	0.132703081232493	0.135810377962844	0.142691684039842	0.150224215246637	0.143509127789047	0.129801734820322	0.177126556016598	0.16044776119403	0.168086754453912	0.0553861788617886	0.179190751445087	0.143589743589744	0.127075567604202	0.114080574391703	0.128205128205128	0.24160756501182	0.180305131761442	0.161690399632522	0.182026894063627	0.193319415448852	0.148148148148148	0.0895432692307692	0.367372881355932	0.424433249370277	1	0.30176026823135
E5002_5_non	0.209424083769634	0.114957264957265	0.167283493708364	0.26228813559322	0.128647214854111	0.111988847583643	0.124492557510149	0.0945454545454545	0.168732125834128	0.0737122557726465	0.0943480195816644	0.085419734904271	0.107706310679612	0.119869971556278	0.0670505964623612	0.176588897827836	0.108827493261456	0.107960741548528	0.0922473012757605	0.105033690051526	0.100249584026622	0.101334951456311	0.0919870643190801	0.108868299139643	0.11919315403423	0.0926206448820602	0.117596932253941	0.110151187904968	0.1136430896715	0.165206508135169	0.12964366944655	0.124303368063969	0.065597667638484	0.255067567567568	0.101925786754345	0.0993292877674864	0.0834264432029795	0.112130054189246	0.242973708068903	0.12567956507835	0.120288013553579	0.130355515041021	0.134248665141114	0.137314439946019	0.0764508928571429	0.282808902532617	0.293402137854773	0.30176026823135	1
E5002_6_non	0.197037037037037	0.153658536585366	0.184938704028021	0.195230998509687	0.173344580345846	0.149495835160018	0.150464919695689	0.120220900594732	0.170461354104254	0.0879572544184135	0.0993865030674847	0.0989277066758907	0.127579192095321	0.131968145620023	0.0895407178695484	0.130465949820789	0.172161172161172	0.198492462311558	0.176393010220903	0.16937984496124	0.137316976652157	0.15990381725278	0.137091162143354	0.161960402466732	0.17163504968383	0.177599286033021	0.187893252332393	0.17725509214355	0.16283134284882	0.213114754098361	0.189620253164557	0.199556541019956	0.0594925634295713	0.125131810193322	0.139884904825144	0.166507785192247	0.141506002182612	0.145512060102807	0.174308300395257	0.201987816607887	0.1721044045677	0.222979250541963	0.205948795180723	0.173402868318123	0.0827897641746111	0.334329473290997	0.309281961471103	0.343674456083803	0.251722887196228
E5004_2_UC	0.168512658227848	0.184636742248959	0.153846153846154	0.155818540433925	0.22265625	0.205761316872428	0.167144221585482	0.150731707317073	0.150967332699017	0.130787589498807	0.121451838064216	0.135082223962412	0.133774000629525	0.139789473684211	0.130106571936057	0.116026387272022	0.246443675509419	0.251948861864671	0.240105540897098	0.255270394133822	0.199076212471132	0.171026814911707	0.182753164556962	0.19076812116841	0.183813892529489	0.180358829084042	0.194438060216042	0.188213914849429	0.185067007019783	0.204183006535948	0.195834460373276	0.200261437908497	0.077928607340372	0.085003711952487	0.268360022087245	0.138208654813821	0.128205128205128	0.125	0.154307758251179	0.247663551401869	0.209129017233349	0.233534946236559	0.230542700883467	0.19798052650559	0.109799291617473	0.170991823675791	0.178072863466122	0.209256329113924	0.131194295900178
E5004_3_UC	0.160070671378092	0.18159509202454	0.158569500674764	0.151183327446132	0.184364548494983	0.188	0.174502329521389	0.148717948717949	0.145586107091172	0.109375	0.118415679869334	0.138222849083216	0.132853025936599	0.135377711293942	0.12046783625731	0.113620569840167	0.248601398601399	0.233040022707919	0.226363944425618	0.232128514056225	0.196319018404908	0.188811188811189	0.190886257624686	0.211140760507005	0.2	0.200766110860748	0.206286836935167	0.204517554628038	0.205785863405905	0.21791707798618	0.215766572818019	0.216316440049444	0.0714904679376083	0.0916414904330312	0.260681709073452	0.14347158218126	0.135279458882164	0.134282416313967	0.153435114503817	0.239399869536856	0.205688375927453	0.225114854517611	0.221930153961697	0.201382033563672	0.091403162055336	0.182441253263708	0.19001256281407	0.19688936019795	0.138861788617886
E5004_4_UC	0.165485973363559	0.149969078540507	0.173362685745735	0.139949818790075	0.16656050955414	0.139186991869919	0.131950989632422	0.12576	0.181638696939783	0.103879849812265	0.099168463196797	0.119757174392936	0.159240321402484	0.12253193960511	0.117345399698341	0.10035451322607	0.202130565419284	0.221435316336166	0.201458277072644	0.188777066178713	0.154319090070704	0.185	0.174356071327484	0.202425876010782	0.221397491681597	0.218638702018203	0.237057220708447	0.216284987277354	0.185644768856448	0.248646307125839	0.21251629726206	0.209762255417631	0.0596727622714148	0.0891141942369264	0.202505219206681	0.143431298668676	0.122312203295169	0.105971896955504	0.115551694178975	0.228116710875332	0.178963893249608	0.224024328433857	0.201529861724036	0.22431693989071	0.0784244144783534	0.166317443687795	0.19974025974026	0.175027870680045	0.137605042016807
E5004_6_UC	0.155428186109238	0.170138888888889	0.155311591863093	0.153950491692099	0.176214934808376	0.162128712871287	0.149783208513993	0.135980746089049	0.147733631785115	0.107128944292949	0.108419838523645	0.12625250501002	0.13604683579593	0.133689839572193	0.117777777777778	0.10564542753384	0.24247491638796	0.228915662650602	0.230140568813338	0.225954198473282	0.1817481709665	0.175072463768116	0.189625558227413	0.213826366559486	0.218610199821056	0.199693117053924	0.211538461538462	0.211321659870473	0.209765963594337	0.234264884568651	0.208693504569029	0.215846338535414	0.0787304204451773	0.0933676754668384	0.268315018315018	0.1561004784689	0.138319672131148	0.135929463629684	0.142135642135642	0.241032095657646	0.205893909626719	0.227488151658768	0.219669777458722	0.232142857142857	0.0888477556686719	0.169512573734865	0.1875	0.176274575141619	0.140444166406006
E5006_1_CD	0.135646687697161	0.154067674586033	0.129479072568503	0.139216310927047	0.15553925165077	0.1526599845798	0.149126069170695	0.117515805132019	0.122047244094488	0.110088365243004	0.121467889908257	0.126827717736809	0.125	0.130478759271746	0.124779696862883	0.113851992409867	0.191176470588235	0.189334013779025	0.186972255729795	0.187302700806734	0.150869719559815	0.153027823240589	0.153187440532826	0.177453027139875	0.170054945054945	0.204094689699296	0.191233435270133	0.186506133575647	0.185426862425231	0.223957119552552	0.234348355663825	0.227038425492034	0.05721864342554	0.0733834586466165	0.136293436293436	0.137426077161363	0.117272147864882	0.10753052917232	0.137649063032368	0.20733137829912	0.1708197905381	0.182092004381161	0.182450331125828	0.171538234425746	0.0767263427109974	0.138399306558798	0.146607092990785	0.143607164916615	0.110497237569061
E5006_2_CD	0.140614780902551	0.11294964028777	0.134351620947631	0.102833492518306	0.13825402772574	0.122464898595944	0.11912814731304	0.104620084001527	0.120592193808883	0.0664952240999265	0.0697674418604651	0.0755012531328321	0.0959194488606253	0.0821368948247078	0.0650294015911449	0.0699717602761217	0.201782304264799	0.23412913727618	0.210892970234326	0.175224416517056	0.103278110680296	0.149441340782123	0.118730158730159	0.13895486935867	0.144947542794036	0.189084658358401	0.188757519186891	0.152164111812444	0.137653990358864	0.208274565115186	0.211195306770961	0.232563732563733	0.0518460329929301	0.0646750846935633	0.138319260152795	0.124570446735395	0.117918313570487	0.112169312169312	0.147581792318634	0.256667712582366	0.155834564254062	0.250371691941719	0.209863588667366	0.161795721602892	0.0738434163701068	0.179297597042514	0.181307305530908	0.184757505773672	0.11455201443175
E5008_2_UC	0.204071740184198	0.114666666666667	0.164898320070734	0.238670694864048	0.151755379388448	0.112826603325416	0.145676146256529	0.092539039907461	0.155449890270666	0.0983227299016773	0.120092378752887	0.0931593159315932	0.104761904761905	0.130940343781598	0.0768033212247016	0.2023988005997	0.12363194162951	0.115130544196288	0.11198738170347	0.1345	0.151055766107201	0.109090909090909	0.129538323621694	0.12202852614897	0.124105865522175	0.0957910014513788	0.0954808806488992	0.0987158908507223	0.112864493996569	0.154339938598939	0.130148741418764	0.135261707988981	0.0676020408163265	0.225274725274725	0.139737991266376	0.0878302940081876	0.0928212162780064	0.123366440146367	0.293193717277487	0.117274758004468	0.134471718249733	0.112617309697602	0.150961087669948	0.112758486149044	0.102423768569195	0.210458636948135	0.205159209995969	0.234844868735084	0.258379888268156
E5008_3_UC	0.18289224952741	0.0837615621788284	0.137103684661525	0.234561752988048	0.0920212765957447	0.0713073005093379	0.10845383759733	0.0689075630252101	0.130558520099609	0.0590833793484263	0.086522462562396	0.0652741514360313	0.0776333789329685	0.0924939467312349	0.0475237618809405	0.191646191646192	0.0784389489953632	0.0780399274047187	0.0648912228057014	0.0833333333333333	0.0838807478524507	0.0689890710382514	0.0726658217152514	0.0811528251801289	0.081025641025641	0.0648408239700375	0.0660377358490566	0.062033462033462	0.0790343915343915	0.10888710968775	0.0832196452933151	0.0883280757097792	0.0667926906112161	0.249747219413549	0.0770128354725788	0.067489114658926	0.0579710144927536	0.094949494949495	0.278221208665906	0.0793423874195854	0.0844287158746208	0.0878378378378378	0.106935123042506	0.0895635673624288	0.0672143390589992	0.204150783566285	0.197373656983685	0.210966542750929	0.266635644485807
E5008_4_UC	0.20489538097118	0.121045972163644	0.178440029433407	0.245577951460304	0.146760687527545	0.128987517337032	0.14659449706811	0.116310767832803	0.158893034825871	0.102816271792579	0.114666666666667	0.104274134119381	0.119515885022693	0.129227053140097	0.0876543209876543	0.198227236099919	0.130670277589709	0.122237380627558	0.117414248021108	0.1348	0.152759948652118	0.132348414896891	0.144551519644181	0.14247311827957	0.15499533146592	0.128125691524674	0.138464846269619	0.140800390434358	0.15235792019347	0.187878787878788	0.154868387426527	0.155780133103278	0.0711896798853321	0.205025927403271	0.158123791102515	0.0988353792886371	0.0911102914053855	0.112157183790422	0.248769574944072	0.133015873015873	0.13527180783818	0.13798309178744	0.156907768848067	0.1438127090301	0.0886075949367089	0.231663035584604	0.254141698977793	0.257974481658692	0.255180353031466
H4001_10_CD	0.188753269398431	0.143067123958844	0.17373572593801	0.221971066907776	0.157012195121951	0.139397201291712	0.186830835117773	0.121514992109416	0.156749404964298	0.123230204509701	0.142333856619571	0.134607218683652	0.128008021390374	0.164866134335369	0.122518159806295	0.209036969420356	0.139886578449905	0.116087212728344	0.124449339207048	0.151765245300321	0.147215496368039	0.115026595744681	0.131449631449631	0.143973214285714	0.150135869565217	0.10053032049804	0.100287801638255	0.106588654286441	0.128478964401294	0.167110874200426	0.153148199065164	0.146610614818707	0.0836630864895421	0.188712522045855	0.143014908890116	0.114004222378607	0.112848689771767	0.139590281086232	0.218981710331191	0.120939875604699	0.136756238003839	0.111326234269119	0.14759676733305	0.145024047354791	0.0803921568627451	0.196644557159579	0.187729610580456	0.190576356752209	0.19853539462978
H4001_4_CD	0.150028522532801	0.0451030927835052	0.101117886178862	0.200723327305606	0.0602572782667569	0.0285296269202634	0.0905141202027516	0.0319535221496006	0.109233305853256	0.063150074294205	0.0697674418604651	0.0520386266094421	0.0579825258141382	0.0773447015834348	0.0268370607028754	0.185321100917431	0.0217294900221729	0.0290969899665552	0.0159827213822894	0.0215541690300624	0.0356027482823235	0.0256111757857974	0.0290872617853561	0.0368421052631579	0.0352167182662539	0.0226586102719033	0.0213429256594724	0.019327731092437	0.0312035661218425	0.0684532478881445	0.041878552198624	0.0461053837342497	0.0450606585788562	0.250787649653434	0.0311077389984825	0.0424628450106157	0.0366774541531823	0.0817245817245817	0.24203821656051	0.0205479452054795	0.0240889437924645	0.025515947467167	0.0507667900581703	0.0365217391304348	0.0431893687707641	0.145357316480311	0.142727684639782	0.164285714285714	0.229372937293729
H4001_5_CD	0.10074791025077	0.145029875067898	0.103577371048253	0.134615384615385	0.14572864321608	0.136336336336336	0.181494661921708	0.12907045589106	0.0951396070320579	0.123022847100176	0.137710633352702	0.139729855612483	0.107984523390784	0.141194331983806	0.124664159054272	0.118597138901707	0.130928252938792	0.110314739794328	0.106864274570983	0.141217564870259	0.155795148247978	0.115508021390374	0.149977344811962	0.139544182327069	0.124110953058321	0.0961677512653651	0.0948315643747116	0.114262560777958	0.124827586206897	0.120280474649407	0.128839590443686	0.117139001349528	0.100845803513338	0.0890260026443367	0.150249376558603	0.099850411368736	0.105601469237833	0.107873210633947	0.100687622789784	0.0902853015529072	0.121925693354265	0.095643294758339	0.0995998221431747	0.102573953131003	0.080999242997729	0.10368932038835	0.102639296187683	0.0959192259150189	0.0884
H4001_6_CD	0.182813002896685	0.131769575715764	0.187829866501087	0.206144697720515	0.131976131976132	0.119021540708288	0.156798245614035	0.103151862464183	0.187551187551188	0.101997146932953	0.121820136151917	0.12597200622084	0.14003164556962	0.147255689424364	0.12079615648593	0.180505415162455	0.158433206664718	0.131931166347992	0.133371008759537	0.146074859224909	0.141431520991053	0.141416821438047	0.15499533146592	0.157364787111623	0.180283224400871	0.147642928786359	0.156763096168882	0.155759162303665	0.151051128990397	0.200045055192611	0.169433704798726	0.16542343132953	0.070627802690583	0.197109067017083	0.122767857142857	0.116115029842648	0.102864182322144	0.113704568189396	0.183362218370884	0.134199134199134	0.130538513974097	0.114720812182741	0.147984886649874	0.166810966810967	0.0551724137931034	0.17741935483871	0.195596225336002	0.176214196762142	0.207067575945443
H4001_7_CD	0.185813751087903	0.104216011369019	0.146273415703468	0.23728813559322	0.119586614173228	0.0975609756097561	0.150649350649351	0.0872894333843798	0.146325016857721	0.0979989738327347	0.12654958677686	0.103305785123967	0.11026991441738	0.135655362053162	0.0827489481065919	0.201543349977304	0.0988329686360321	0.0891829689298044	0.0812433768986224	0.0960698689956332	0.106591865357644	0.089372765680858	0.0947660586835845	0.102223816355811	0.100487804878049	0.0702108568864962	0.0762564991334489	0.0789081885856079	0.0941915227629513	0.145211930926217	0.128398384925976	0.1198973042362	0.0800902425267908	0.231824417009602	0.101758124667022	0.0843043180260452	0.0853960396039604	0.114219114219114	0.240684793554884	0.0904809956273125	0.0958333333333333	0.0871762476310802	0.112211221122112	0.100320170757737	0.0720779220779221	0.183854770181537	0.187867647058824	0.199830292745015	0.255972696245734
H4001_8_CD	0.166344294003868	0.077991452991453	0.125109745390694	0.224615384615385	0.0863787375415282	0.0758208955223881	0.121462264150943	0.0776986951364176	0.121729651162791	0.0913978494623656	0.103366804489073	0.0836781609195402	0.0870337477797513	0.115404430705822	0.0659925492283129	0.202472952086553	0.0727056019070322	0.0637059724349158	0.0638792102206736	0.0806689621249385	0.068678459937565	0.0559416261292564	0.0722733245729304	0.07981220657277	0.0794376098418278	0.0526564344746163	0.0515021459227468	0.0518769551616267	0.0737982396750169	0.11311969323473	0.0880785413744741	0.0858138911236256	0.0567282321899736	0.242693110647182	0.0914179104477612	0.0653961136023916	0.0652573529411765	0.109508547008547	0.239055299539171	0.0501972032986734	0.0636975660279648	0.0581670612106865	0.0768187980117488	0.0704659222179438	0.0469483568075117	0.166596015260704	0.169539078156313	0.188563327032136	0.249881235154394
H4001_9_CD	0.155181214905564	0.0523648648648649	0.104300091491308	0.221494817239498	0.0652173913043478	0.039622641509434	0.0969962453066333	0.0451127819548872	0.108261033572237	0.0593434343434343	0.0824937027707809	0.0702859912748425	0.0706141963957337	0.0974414806750136	0.0468661773009599	0.185567010309278	0.0420751633986928	0.039724741945574	0.0333996023856859	0.0448979591836735	0.0467032967032967	0.0351002865329513	0.0431034482758621	0.0444	0.0465616045845272	0.0330855909853752	0.0325389550870761	0.0324123273113709	0.0449360525406153	0.0859916782246879	0.0715311692042516	0.0711343037627025	0.0483405483405483	0.229752066115702	0.0476190476190476	0.0517711171662125	0.0453012048192771	0.0770949720670391	0.222222222222222	0.0353817504655493	0.0495867768595041	0.0430521526076304	0.0592697961119014	0.0469558296856347	0.0411558669001751	0.153812056737589	0.149916943521595	0.167242229896399	0.223865877712032
H4004_2_CD	0.136115250869349	0.137620192307692	0.130797773654917	0.1389028686462	0.126993865030675	0.138492871690428	0.120428751576293	0.122760451227605	0.124952525636156	0.0882352941176471	0.0832815413300187	0.104950495049505	0.111321469140477	0.100323624595469	0.0830449826989619	0.0770355923939542	0.11231101511879	0.0894890986007159	0.09979035639413	0.115778136779752	0.123471170646476	0.105043610163064	0.116290245074483	0.131386861313869	0.133512889572913	0.103386809269162	0.113569321533923	0.121307714367651	0.131031922791388	0.11114245416079	0.0992679355783309	0.0954773869346734	0.0734011627906977	0.0861819932595089	0.146272855133615	0.099636950383219	0.087797619047619	0.0784530386740332	0.0680021085925145	0.106114398422091	0.112456747404844	0.109715552271888	0.111220472440945	0.122147083685545	0.0937781785392245	0.120733788395904	0.13953488372093	0.113181183046111	0.109340416113324
H4004_3_CD	0.153578874218207	0.13454827452501	0.156614461846051	0.136551724137931	0.122409073132577	0.11202297907263	0.109794628751975	0.109527687296417	0.155626265548163	0.0857483128225486	0.0701619121048574	0.122378824338261	0.151814223512337	0.0943732193732194	0.084171322160149	0.0760039827414537	0.1275	0.120173868575812	0.123195084485407	0.120534103211837	0.105636431504293	0.126105563480742	0.120908483633935	0.137364341085271	0.143062338408503	0.139762107051827	0.153192371475954	0.15436711816908	0.146067415730337	0.139321723189734	0.129009433962264	0.128129267182522	0.0595187842971718	0.0801313628899836	0.12600422832981	0.120417287630402	0.101023890784983	0.0902118334550767	0.0744643484369512	0.129526052399176	0.116051243406179	0.140717716869172	0.120531154239019	0.144275519702141	0.0594339622641509	0.141965678627145	0.159042714328991	0.123031496062992	0.116403785488959
H4006_3_CD	0.131631431990427	0.112984054669704	0.107076695072249	0.142103126268778	0.13396674584323	0.116850551654965	0.105988593155894	0.0830917874396135	0.0896680111697176	0.0617633191890618	0.0831365139348134	0.0841777084957132	0.0873634945397816	0.0969927996611605	0.0672527472527473	0.0811128526645768	0.122888968738771	0.135450043693562	0.119223985890653	0.121471343028229	0.0877577885037297	0.0937796021471424	0.0776444111027757	0.101694915254237	0.107029765674478	0.121755111417413	0.154807910888838	0.139208173690932	0.131487889273356	0.171145316984086	0.162614802809292	0.150720164609053	0.0394871794871795	0.0624763347216963	0.117375704766786	0.0960187353629977	0.0833333333333333	0.0940096195889812	0.13081650570676	0.185997171145686	0.177113010446344	0.19261744966443	0.178841309823678	0.170990135184509	0.0855911330049261	0.16887417218543	0.203817068779258	0.190283400809717	0.158453373768006
H4006_4_CD	0.124570024570025	0.0961740041928721	0.112208892025406	0.0939452186448823	0.0970228601807549	0.0871471636064675	0.0807866064310391	0.077089532053016	0.110124709363771	0.0395833333333333	0.0491675338189386	0.0627497062279671	0.0944700460829493	0.0610144572408723	0.0538558786346397	0.0548651817116061	0.130869363086936	0.171654197838737	0.140436397400186	0.104583438845277	0.0691839837810441	0.126406926406926	0.0887420344583432	0.114757808963332	0.132597880164395	0.162337662337662	0.195233087977567	0.156500652863272	0.118398994132439	0.189421424479664	0.165220744168113	0.182042990298649	0.0314895947426068	0.0486735870818916	0.0858725761772853	0.109734513274336	0.0794606308692511	0.0693219057222082	0.0877016129032258	0.200282752120641	0.12958500669344	0.216731785796369	0.161982626469085	0.170414201183432	0.0466089034956678	0.142691145712294	0.186784963810413	0.162155450707723	0.119775858043428
H4006_5_CD	0.130830155470813	0.110362528071864	0.123702664796634	0.102446043165468	0.114201570680628	0.105245231607629	0.0942100098135427	0.0848585690515807	0.121564743748453	0.0606552059682128	0.0697899838449111	0.0795454545454545	0.10693215339233	0.085439229843562	0.0839886756841774	0.0727066174382278	0.167700112739572	0.18743961352657	0.164166666666667	0.152993348115299	0.0900872817955112	0.127263581488934	0.106655290102389	0.12711182622687	0.153295861011753	0.166666666666667	0.19709462112289	0.169263607257204	0.137259733859044	0.209532176586866	0.191136974037601	0.191064844936023	0.0396039603960396	0.0584002214226405	0.108876560332871	0.10159055926116	0.0795063145809414	0.0761235096300825	0.102453987730061	0.23712507074137	0.174672489082969	0.233009708737864	0.191529118654625	0.198694294635254	0.0622612681436211	0.145548880393228	0.1873128233052	0.170659568175096	0.121387283236994
H4008_1_non	0.199925678186548	0.138097149739061	0.190560056357872	0.231271609681137	0.155509355509356	0.135732870771899	0.149196956889265	0.123240938166311	0.192425167990226	0.107202680067002	0.115033222591362	0.114466292134831	0.139958835636577	0.142091152815013	0.106316202432326	0.159308314937454	0.158813838550247	0.151368760064412	0.139705882352941	0.151700420328621	0.162348178137652	0.173106175844235	0.183399782529902	0.190745672436751	0.213104524180967	0.152249890782001	0.163760102084219	0.16943841889612	0.177390791027155	0.211166253101737	0.16728809346259	0.161336515513126	0.0647007042253521	0.160798548094374	0.155435759209344	0.133498145859085	0.11407249466951	0.126508369015181	0.179181565355582	0.153325123152709	0.146107784431138	0.147093023255814	0.166180758017493	0.181668856767411	0.0829145728643216	0.201683501683502	0.223386832623649	0.202453987730061	0.203490401396161
H4008_10_non	0.127272727272727	0.144093466032021	0.128849557522124	0.135216572504708	0.143614670790985	0.132462686567164	0.147526100771675	0.11961503208066	0.123789346246973	0.0825242718446602	0.0986784140969163	0.0987108655616943	0.105578884223155	0.103162055335968	0.0995399414470933	0.0910431256911168	0.163343826512767	0.150112233445567	0.146059782608696	0.154601226993865	0.160675617150282	0.15615141955836	0.185042405551272	0.183088749126485	0.186837881219904	0.148407499435283	0.159385290889133	0.167000500751127	0.171499074645281	0.166376523252922	0.14311088556204	0.142752383280372	0.0794573643410853	0.0934545454545455	0.152468538238141	0.120889748549323	0.113885735906167	0.119718309859155	0.116606353035786	0.147514525500323	0.146278870829769	0.153255528255528	0.151109410864575	0.156536502546689	0.0838852097130243	0.132417029835736	0.133717210492642	0.119786096256684	0.11770761839396
H4008_11_non	0.157894736842105	0.134453781512605	0.180020544427324	0.129279509453245	0.155671296296296	0.121380520620064	0.139959432048682	0.115975645114526	0.187427511018325	0.0928915321438686	0.09151973131822	0.1088933804952	0.144526859968532	0.106220347917765	0.112796469939327	0.0942355889724311	0.212090163934426	0.224421708185053	0.210126582278481	0.173418423973363	0.155542986425339	0.210262529832936	0.195623165198826	0.212550607287449	0.245241581259151	0.22084273890143	0.228099173553719	0.214857829395274	0.171808151317271	0.221888153938665	0.189814814814815	0.19328885400314	0.0619520748100526	0.0845416564266405	0.132137518684604	0.140621350151834	0.117103235747304	0.101313320825516	0.0999211149092821	0.192548076923077	0.13911346529133	0.178310502283105	0.169226694915254	0.195825049701789	0.0695017454776262	0.149723624128815	0.171597633136095	0.143324113653508	0.116084250837721
H4008_13_non	0.146804835924007	0.121932515337423	0.124028497409326	0.112010796221323	0.143426294820717	0.124948111249481	0.123550579768093	0.103238866396761	0.115610164758447	0.0588463027487418	0.0656429942418426	0.0807679576299239	0.106525376464027	0.0801405975395431	0.0670821114369501	0.0629508196721311	0.182175622542595	0.203240867893436	0.190491696515793	0.168611215656756	0.134431252393719	0.163277335691129	0.152868430092752	0.167409293443666	0.173400176938956	0.1718715876829	0.18160577740017	0.168834239772996	0.14510244176256	0.188904830224773	0.177613776137761	0.187874430865085	0.0510887772194305	0.0623385012919897	0.15331312256388	0.114438185591462	0.108591065292096	0.101476014760148	0.122980910425844	0.212705436156764	0.162024323264025	0.21523178807947	0.187229437229437	0.162673392181589	0.0777351247600768	0.184082821093497	0.195625	0.197690692792162	0.121000950269243
H4008_15_non	0.111314704535044	0.128262076624098	0.121898127993034	0.114100185528757	0.148169668797211	0.125852448853069	0.158403869407497	0.103676913803496	0.128867855842738	0.119148936170213	0.124253285543608	0.108980355472404	0.101397348620566	0.110601427115189	0.113134657836645	0.103383458646617	0.135564853556485	0.120141342756184	0.120032441200324	0.133264992311635	0.148888888888889	0.134522482348569	0.165168007572172	0.158730158730159	0.138376383763838	0.111332007952286	0.107710557532622	0.125347415230684	0.139077583124777	0.110264089300299	0.106594656054576	0.106180234141029	0.107607950651131	0.102162908421537	0.149447693307342	0.10917537746806	0.112064854554125	0.114605543710021	0.0857572718154463	0.0936454849498328	0.101171458998935	0.0782161234991424	0.105117565698479	0.0943987465726596	0.0833333333333333	0.105957616953219	0.10350018818216	0.0919689119170984	0.0752032520325203
H4008_17_non	0.155179204411186	0.156719817767654	0.146894756415024	0.151167392164622	0.170122525918944	0.155721393034826	0.175072744907856	0.127290260366442	0.132454488386692	0.084526558891455	0.0978860294117647	0.100994644223412	0.114881693648817	0.118234804329725	0.0950108459869848	0.0913608562691132	0.197397769516729	0.187983343248067	0.183134274339486	0.18225315354502	0.177411979881116	0.165302782324059	0.179578863726659	0.193090909090909	0.190981432360743	0.161418241194308	0.1621014818141	0.162541464659352	0.171637055837563	0.191528066528067	0.170835550824907	0.177531564029889	0.082059123343527	0.091798344620015	0.164194373401535	0.123251165889407	0.117276662731208	0.141476274165202	0.132683340398474	0.171477079796265	0.156264032330489	0.171373555840822	0.168611670020121	0.168082094833687	0.0884074941451991	0.161462029808375	0.15635507733692	0.153057349031523	0.137495488993143
H4008_19_non	0.147487844408428	0.167624521072797	0.141162968630451	0.138224564248075	0.163654127992184	0.156087408949011	0.181078331637843	0.139582272032603	0.129832474226804	0.0987775061124694	0.106918238993711	0.122473726758286	0.123668065870197	0.116148531951641	0.105887722501141	0.0994011976047904	0.202312138728324	0.181487101669196	0.183414269704894	0.182023486901536	0.209188660801564	0.181756064229587	0.217834394904459	0.219792865362486	0.206288873531444	0.159771754636234	0.151577036532789	0.155642023346304	0.163966299416721	0.161658031088083	0.153474644486182	0.165623369848722	0.0894396551724138	0.0877669902912621	0.184640522875817	0.120589242891401	0.126285479226656	0.136032757051865	0.123688811188811	0.15085910652921	0.151769087523277	0.150405186385737	0.152075626798192	0.146131805157593	0.0858554663372452	0.14388748647674	0.129228687415426	0.134957463263728	0.109051254089422
H4008_2_non	0.135627530364372	0.137800849457291	0.141312741312741	0.113736483780537	0.151026392961877	0.141445657826313	0.144638403990025	0.131592421915003	0.124031007751938	0.0703953712632594	0.0828544061302682	0.0848126232741617	0.0948002536461636	0.0926954293037164	0.0980751604032997	0.0808561236623068	0.182339449541284	0.162357185808779	0.183496608892238	0.178880291306327	0.16690510252742	0.193739130434783	0.199240185732377	0.194318181818182	0.199445983379501	0.168915662650602	0.157532675991745	0.169263269078426	0.161994784876141	0.154364154364154	0.146845637583893	0.159791122715405	0.0714285714285714	0.0777000777000777	0.169934640522876	0.140646976090014	0.134309623430962	0.113615870153291	0.110432125709297	0.156685236768802	0.148287189113092	0.155891040367575	0.161992465466722	0.153818181818182	0.0928030303030303	0.152014652014652	0.15890794539727	0.152596115735236	0.099236641221374
H4008_21_non	0.0878076062639821	0.115827338129496	0.10432033719705	0.0890022675736961	0.119011976047904	0.124684077506318	0.148	0.115702479338843	0.0844370860927152	0.0691823899371069	0.0835266821345708	0.0732538330494037	0.0631406314063141	0.0801526717557252	0.0756302521008403	0.0632118451025057	0.132927447995941	0.0990859232175503	0.113225963884822	0.132198952879581	0.160087719298246	0.116319444444444	0.146412037037037	0.145927036481759	0.12678494158373	0.0916301969365427	0.0827300930713547	0.0948143602332004	0.106339468302658	0.0853952926976464	0.0883572567783094	0.0854545454545454	0.090297790585975	0.0627429205996669	0.164556962025316	0.0846223839854413	0.101130279595479	0.105769230769231	0.0767263427109974	0.0845814977973568	0.102849200833912	0.0794809407948094	0.0942318675042833	0.0874471086036671	0.0928481806775408	0.0855106888361045	0.0764163372859025	0.0813093980992608	0.0670611439842209
H4008_22_non	0.138221660345554	0.135334645669291	0.119748723989007	0.110327664869349	0.158517756047349	0.152701212789416	0.149527806925498	0.12620320855615	0.108702791461412	0.07193515704154	0.085556114745848	0.0848708487084871	0.0973132372214941	0.0882483370288248	0.0847136772361571	0.073240589198036	0.197036443732479	0.20153305653146	0.201344936708861	0.195767195767196	0.15248401377275	0.149568221070812	0.158763759525826	0.165074512800917	0.161022805805114	0.149394673123487	0.148165350673479	0.143612800846337	0.136617405582923	0.158020750199521	0.152973720608575	0.162068041789445	0.068361581920904	0.0740144810941271	0.160704145371948	0.107193229901269	0.115532734274711	0.110798122065728	0.132250580046404	0.187015861305791	0.172086043021511	0.186805555555556	0.181255526083112	0.146004480955937	0.0897521768251842	0.165134099616858	0.150699677072121	0.175681341719078	0.111534069280548
H4008_3_non	0.149925037481259	0.138273238504797	0.128858680260549	0.134563858291158	0.147068790240596	0.131976131976132	0.127883310719132	0.108829568788501	0.125811283075387	0.0613977792292619	0.0758417783589408	0.0868315123634273	0.105276134122288	0.0902461257976299	0.076681332495286	0.0786678151019236	0.200640652300524	0.229841748304446	0.191714285714286	0.178769130576359	0.146389713155292	0.177930306230201	0.178745432399513	0.195826186392224	0.206119162640902	0.194596790574853	0.235868239121594	0.21235006663705	0.183973202782788	0.224503459049319	0.200090538705297	0.210619469026549	0.0628952916373858	0.0767053495612794	0.155636363636364	0.135795907520595	0.118051404662283	0.102362204724409	0.127444794952681	0.238474672737621	0.183861082737487	0.257458563535912	0.203288017704711	0.20671834625323	0.0730664593859308	0.183725545789623	0.211216517857143	0.196233292831106	0.146169069833192
H4008_4_non	0.143863179074447	0.127007844602167	0.124723713293338	0.118929633300297	0.146785437645236	0.132174616006467	0.127916018662519	0.103880831046648	0.116088500409724	0.0560538116591928	0.064611956925362	0.0780597494378413	0.0911290322580645	0.0783912747102931	0.0683274021352313	0.0607893061744112	0.184817424727739	0.205715826368293	0.188769035532995	0.177163904235727	0.131998516870597	0.151083238312429	0.142525687769307	0.169570628500311	0.167862266857963	0.176584734799483	0.197373994070309	0.18363508111921	0.152846876727474	0.195513577331759	0.194124847001224	0.197627520759193	0.0509090909090909	0.0635619886721208	0.162515829463909	0.121141525917298	0.106035345115038	0.10806916426513	0.131465517241379	0.256156060121522	0.180587780355762	0.253948967193196	0.201847903340441	0.189112649465072	0.079445727482679	0.178077889447236	0.216837527182355	0.203012666894899	0.139002196422968
H4008_5_non	0.124742974640164	0.120682964687621	0.116785946649317	0.106657608695652	0.135525260625501	0.123160992013451	0.12363194162951	0.108955839867932	0.113080168776371	0.0630666141111549	0.0678627145085803	0.0832494125545485	0.0944026733500418	0.0843158270811004	0.0688244047619048	0.0791512293701583	0.190396798932978	0.218574635241302	0.194848084544254	0.160862982588948	0.136858475894246	0.182753403933434	0.165846802529866	0.186274509803922	0.17326585293242	0.182685904550499	0.177034512143161	0.165913952935584	0.159162603957557	0.175881792183031	0.177535333498636	0.195673310646573	0.0550576184379001	0.0575797007156799	0.151820974111452	0.136530238240684	0.132504440497336	0.115442846328539	0.134861006761833	0.211415816326531	0.154818325434439	0.23008305136881	0.18592781625957	0.156527249683143	0.0775988286969253	0.170274636510501	0.190820496699151	0.192741367159972	0.106510745891277
H4008_6_non	0.128036086051353	0.10994560994561	0.119078947368421	0.0938983050847458	0.126256533976679	0.110597140454163	0.111516626115166	0.0916563912864776	0.118837275577087	0.0409996095275283	0.0545383716400467	0.0589794565937707	0.0818534961154273	0.0641161884520014	0.0624299065420561	0.0489256198347107	0.163761920420914	0.179431072210066	0.182267633487146	0.146092865232163	0.108853967037179	0.163516351635164	0.134230503795721	0.160967741935484	0.179487179487179	0.163153271848924	0.169931856899489	0.15992384578772	0.138195232690125	0.164055080721747	0.152136752136752	0.159117856295945	0.0603822762814944	0.0701229644400133	0.132751091703057	0.109107303877367	0.0980869565217391	0.0966528770214366	0.111111111111111	0.190521327014218	0.143026471750296	0.196261682242991	0.182819383259912	0.176145596360091	0.0724137931034483	0.144359464627151	0.154578979717271	0.141204491323579	0.106152374880459
H4008_7_non	0.139653414882773	0.121636983705949	0.1332040090527	0.105577689243028	0.137931034482759	0.132947976878613	0.127676447264076	0.113847396043601	0.128255390646878	0.0621403912543153	0.0635881907645723	0.0752933507170795	0.0943396226415094	0.0791941646405002	0.076782449725777	0.064327485380117	0.187866927592955	0.210252192982456	0.201563008791924	0.166480862133036	0.146136189747513	0.205998182368979	0.184486373165618	0.202729044834308	0.201497005988024	0.198668146503885	0.191865417376491	0.188395415472779	0.160835214446953	0.181775259678942	0.169294203250061	0.186356073211314	0.0516742455560149	0.0650641025641026	0.149616368286445	0.142814100632721	0.126468555632343	0.107077374404107	0.116203536629376	0.21233949264015	0.150095969289827	0.208370436331256	0.190050107372942	0.171545483160214	0.0800568450971104	0.184353959602437	0.180428134556575	0.185528120713306	0.1165625
H4008_8_non	0.111844820470491	0.104707012487992	0.107866043613707	0.0770471964501815	0.118086696562033	0.104398516163222	0.119425935417734	0.0937988535695675	0.107131120604666	0.0399408284023669	0.055992141453831	0.0594138900040145	0.0759819703799098	0.0662309368191721	0.0544531610521458	0.0480769230769231	0.149132947976879	0.152547575199509	0.149468892261002	0.125794732061762	0.111851499286054	0.159567039106145	0.125773195876289	0.140179910044978	0.151837856406733	0.122159090909091	0.12665449566408	0.12480458572173	0.120700843608047	0.116362702286155	0.107827476038339	0.109375	0.0680272108843537	0.0669070512820513	0.12046204620462	0.0882250781521362	0.0951979780960404	0.107511737089202	0.103901996370236	0.145149786019971	0.126869271587072	0.149258760107817	0.137916310845431	0.138289962825279	0.0814419225634179	0.126624582250279	0.111497047585967	0.10948036493455	0.0959367945823928
H4008_9_non	0.133064516129032	0.138548539114043	0.133180252583238	0.118426334805299	0.143410852713178	0.138127263321262	0.163378856853819	0.122087132725431	0.119858611825193	0.0806216610004857	0.0925747348119576	0.105094263939029	0.110825570189528	0.10189165950129	0.0888888888888889	0.082837891399128	0.193374422187982	0.178386605783866	0.183151560737119	0.173146473779385	0.172644667623147	0.179883281840027	0.19630096679277	0.201217192848992	0.200346020761246	0.161722488038278	0.152074783401733	0.155329684649466	0.157587548638132	0.161072079104866	0.15034965034965	0.16018784242108	0.0775862068965517	0.0771317829457364	0.169473112438892	0.130873651235642	0.132610508757298	0.132723112128146	0.12043956043956	0.158426183844011	0.160435399905348	0.159434582511506	0.162625418060201	0.157319737800437	0.0863579474342929	0.151315789473684	0.14621500172831	0.144597249508841	0.108711566617862
H4009_1_non	0.144383184011027	0.150550314465409	0.14663143989432	0.118764845605701	0.163761653830563	0.150190920661858	0.167358803986711	0.137729549248748	0.133938706015891	0.103670835014119	0.113918973124749	0.12041166380789	0.133352370074243	0.121488507843853	0.12	0.115583075335397	0.226716519374575	0.232283464566929	0.214143426294821	0.204342768514928	0.156518345042935	0.186654643823264	0.174186778593914	0.175961538461538	0.166129504834456	0.175942156003506	0.18056439635052	0.169623846699787	0.157402155416903	0.189712918660287	0.197898423817863	0.205446146365184	0.0639830508474576	0.0699186991869919	0.13458262350937	0.119714115544967	0.111225895316804	0.105516475379489	0.132913735653462	0.214556962025316	0.175793650793651	0.219939577039275	0.20497803806735	0.168144395186827	0.0771812080536913	0.146570623238334	0.140685543964232	0.16146540027137	0.106595811190997
H4009_10_non	0.139817629179331	0.150044130626655	0.152102376599634	0.115024353690521	0.171336701883326	0.158507028599127	0.158678455095393	0.133364750235627	0.126609442060086	0.100729261622607	0.103324348607367	0.114264093832766	0.122116271916333	0.125051082958725	0.116810344827586	0.101809954751131	0.206162876008804	0.198996161795099	0.201296362981635	0.198364888123924	0.162852112676056	0.186069326357096	0.176744186046512	0.183875530410184	0.182611506140918	0.175401816911251	0.167966139451994	0.167129512749306	0.155500921942225	0.171788413098237	0.176765015806112	0.180498981670061	0.0677718186250609	0.0702956020187455	0.146281800391389	0.129392446633826	0.128105590062112	0.118338229122954	0.119787408013083	0.179805434417981	0.171099290780142	0.171815889029004	0.175237341772152	0.15818431911967	0.0850704225352113	0.141880341880342	0.141276041666667	0.154389880952381	0.106946354883081
H4009_11_non	0.122828282828283	0.142788691902252	0.112799088492214	0.106425702811245	0.142226581657675	0.148834745762712	0.148279352226721	0.12	0.0961599492224691	0.0920856147336984	0.0977406679764244	0.106417546709992	0.0976937860345932	0.108096280087527	0.0941828254847645	0.0895522388059701	0.190143577803648	0.187017001545595	0.173258003766478	0.181566820276498	0.140904806786051	0.139511542321847	0.125549780087965	0.147944199706314	0.128322940597309	0.140122873345936	0.144484958979034	0.138939197930142	0.136115569823435	0.15270551508845	0.171956941760972	0.160883280757098	0.0706905927134312	0.0684292379471229	0.140860215053763	0.102810143934202	0.103575832305795	0.116491548652353	0.129654553611485	0.17672259907176	0.164502164502165	0.183079526226734	0.170710940825883	0.135691086250451	0.0859872611464968	0.14123673618734	0.129642365887208	0.157894736842105	0.11949215832711
H4009_13_non	0.132523759239704	0.17123745819398	0.141153081510934	0.12879191059074	0.191145467322558	0.196414653156664	0.193430656934307	0.162790697674419	0.114184116949822	0.123110151187905	0.130649717514124	0.115261472785486	0.097877358490566	0.138572285542891	0.135382603008502	0.105939004815409	0.199112863479547	0.154483255311487	0.178622327790974	0.212311557788945	0.200134318334453	0.151641046946406	0.175741239892183	0.17428167687235	0.163485477178423	0.129954165543273	0.120531154239019	0.13871260199456	0.136541471048513	0.126037959667853	0.130516431924883	0.12861832288869	0.0933660933660934	0.0730964467005076	0.188498402555911	0.101918976545842	0.12199124726477	0.113161131611316	0.126120741183503	0.141509433962264	0.165688193085453	0.128104059913283	0.16072408118486	0.130454340980657	0.132135306553911	0.127495462794918	0.13000852514919	0.142857142857143	0.099023709902371
H4009_16_non	0.158694246929541	0.139642857142857	0.170792854904419	0.14354527938343	0.15045871559633	0.134197483797179	0.160815402038505	0.121951219512195	0.149177232263286	0.0964912280701754	0.107832422586521	0.113916061849164	0.149334781428184	0.129993229519296	0.121468926553672	0.108757508694278	0.190959409594096	0.185506506761929	0.181379933714974	0.167301697263595	0.1525	0.199316628701595	0.166559278350515	0.181081081081081	0.224819624819625	0.189983093829248	0.200411946446962	0.196691176470588	0.171159029649596	0.231655691439323	0.214131218457102	0.202671579917089	0.0599694423223835	0.0871826246558581	0.142857142857143	0.125909345271405	0.103350189633375	0.105066303978239	0.122593718338399	0.205406993828974	0.179459064327485	0.205379658167554	0.188900033433634	0.205550472705093	0.0809298321136461	0.148332358104154	0.166191562143672	0.146409698476842	0.140629685157421
H4009_18_non	0.037012987012987	0.048823016564952	0.036773428232503	0.0444887118193891	0.0581180811808118	0.0511182108626198	0.0848303393213573	0.0591966173361522	0.028519692168402	0.0476190476190476	0.0540540540540541	0.0418918918918919	0.033609576427256	0.053864168618267	0.049469964664311	0.0447042640990371	0.0425884955752212	0.0374707259953162	0.0403659849300323	0.0549618320610687	0.0626072041166381	0.0368298368298368	0.0474663245670301	0.0434549356223176	0.0372413793103448	0.0250422059651097	0.0259150414106332	0.0323821737736454	0.0484875444839858	0.0343839541547278	0.0389962699220075	0.0372033354714561	0.0437665782493369	0.0235294117647059	0.0693970420932878	0.0303643724696356	0.036551724137931	0.0455675227837614	0.0486656200941915	0.0357667809897109	0.0526762956669499	0.0409356725146199	0.044636908727515	0.0374868004223865	0.0761316872427984	0.0358288770053476	0.0278592375366569	0.0296789824348879	0.0219471018570625
H4009_2_non	0.133586177833965	0.119453924914676	0.110633307271306	0.119227539882452	0.134177215189873	0.117678667383127	0.164529914529915	0.133044889129259	0.0996732026143791	0.100941422594142	0.113648157758173	0.114164904862579	0.103835978835979	0.119102153000458	0.0903441682600382	0.117194183062447	0.138814531548757	0.146744114949557	0.123236822568671	0.131687242798354	0.133138969873664	0.116835016835017	0.130651182082124	0.135700934579439	0.117823765020027	0.107059373539037	0.107543780871127	0.107032854209446	0.124511082138201	0.133681462140992	0.143603851444292	0.144406241734991	0.0835734870317003	0.0800162469536962	0.118261826182618	0.0944386149003148	0.0967469370511196	0.108757062146893	0.132400932400932	0.131616090331687	0.140900195694716	0.144440712126302	0.137665669089354	0.113619810633649	0.0823844608171467	0.132710280373832	0.112813370473538	0.122137404580153	0.112428298279159
H4009_20_non	0.128283862163084	0.153206650831354	0.135632183908046	0.133632596685083	0.145549318364074	0.1265664160401	0.161062681610627	0.126713751557956	0.138039439839954	0.13511259382819	0.14504765851637	0.160185515519087	0.154744525547445	0.159090909090909	0.165259348612786	0.145035460992908	0.181788297172913	0.163558870538093	0.156507936507937	0.168556311413454	0.176306342241723	0.152314001171646	0.182107496463932	0.18514915693904	0.182468694096601	0.146743787489289	0.143386897404203	0.150525087514586	0.153758865248227	0.202764976958525	0.188745019920319	0.183058147882268	0.0730554361839278	0.0945539592382225	0.131028595817328	0.111572700296736	0.102986611740474	0.111859334081556	0.103623188405797	0.142174432497013	0.137292711145391	0.128435221536736	0.130344827586207	0.162239089184061	0.068421052631579	0.103813559322034	0.105217391304348	0.0971685971685972	0.110201511335013
H4009_22_non	0.107676969092722	0.107207752877044	0.0996292863762743	0.1001001001001	0.122940430925222	0.122562674094708	0.134526176275679	0.110580204778157	0.0825859491778774	0.0776826859776168	0.0889033095392602	0.0829585207396302	0.0887708649468892	0.0972222222222222	0.0856287425149701	0.07468671679198	0.12354521038496	0.113258731773483	0.112657677250979	0.123111359820929	0.11951951951952	0.0974576271186441	0.100926377376889	0.106804478897502	0.101720841300191	0.0854526958290946	0.0834748847367144	0.0892351274787535	0.0943119266055046	0.0974504249291785	0.10416043100868	0.10383295194508	0.0608564988730278	0.0503355704697987	0.129963898916967	0.0764563106796116	0.0829516539440204	0.0945475638051044	0.0955307262569832	0.114320585842148	0.127646702964307	0.113257575757576	0.114895780376207	0.104006820119352	0.0996168582375479	0.105740181268882	0.0951425130469691	0.104513064133017	0.0931482310792656
H4009_3_non	0.159264399722415	0.161608198659834	0.152475247524752	0.138297872340426	0.172343876723439	0.170595799399914	0.177620632279534	0.153296934061319	0.140909090909091	0.123064384678077	0.13010101010101	0.143354210160056	0.14134477825465	0.152327746741155	0.139525845316751	0.121691302853214	0.244513031550069	0.243502824858757	0.228533244236552	0.230708661417323	0.197991967871486	0.188023952095808	0.206502322257949	0.224361101891802	0.207729468599034	0.192341744134573	0.189350372736954	0.180780209324453	0.181163594470046	0.199951934631098	0.204710598847407	0.207666181465308	0.0710960643250106	0.0884577441631042	0.161401990480312	0.131736526946108	0.127430555555556	0.119136262099777	0.131936787945608	0.212064090480679	0.187027457222443	0.208817396484957	0.189228007181329	0.191455187921619	0.0841702534672406	0.154642409033877	0.155602282967858	0.167457627118644	0.123737373737374
H4009_4_non	0.130451415455241	0.124231782265145	0.101028004253811	0.121270084162204	0.136054421768707	0.1268620855358	0.144662921348315	0.122206371849738	0.10200364298725	0.0911602209944751	0.0984054669703872	0.112816577129701	0.10929802955665	0.103504482477588	0.081104033970276	0.0943324457968809	0.158214285714286	0.170845481049563	0.139148494288681	0.144050104384134	0.127659574468085	0.125353440150801	0.12359128474831	0.136222910216718	0.122011797578392	0.125337533753375	0.130983463881636	0.124539425202653	0.131586963143466	0.147447073474471	0.153966597077244	0.155510820332159	0.0784313725490196	0.0738156445097319	0.137623762376238	0.0948387096774193	0.092401680030546	0.096693177061532	0.124843423799582	0.1485279523652	0.151152482269504	0.184134150274105	0.151062155782848	0.124534686971235	0.0835253456221198	0.152097902097902	0.131415495259889	0.157894736842105	0.127931769722815
H4009_5_non	0.142250530785563	0.138152610441767	0.132752262822662	0.117934403349616	0.149834437086093	0.13677811550152	0.169535283993115	0.125694741342454	0.125108100317094	0.0944099378881988	0.104526748971193	0.121994342291372	0.117969426016729	0.124057315233786	0.103326810176125	0.104488078541374	0.203697363916467	0.204098820887142	0.171597633136095	0.170097087378641	0.15865966895438	0.166767554479419	0.163636363636364	0.177865612648221	0.158914728682171	0.16116248348745	0.160585490029699	0.153901046622265	0.15661252900232	0.175054177702865	0.17345663584104	0.175688738521025	0.0891891891891892	0.089267461669506	0.131602112676056	0.113912515188335	0.116096866096866	0.125243096071567	0.126423690205011	0.167758029310882	0.153073523503415	0.192924100393106	0.170080468178493	0.152933632574543	0.0802407221664995	0.148374637914387	0.133920437291224	0.141535298149417	0.121340273259597
H4009_6_non	0.100231303006939	0.0991957104557641	0.0755189692197566	0.0968992248062016	0.109879963065559	0.107054760730143	0.124220623501199	0.0928882438316401	0.0755867113684852	0.073828679602461	0.0804490177736202	0.088681446907818	0.0798643231575702	0.0917085427135678	0.0676855895196507	0.0907662082514735	0.138405797101449	0.157256872598286	0.122844068989792	0.131161594513502	0.110814419225634	0.0988005050505051	0.099277291745911	0.122327374693305	0.0960998439937597	0.0984084286034521	0.103008006924908	0.101353013530135	0.127965043695381	0.122011952191235	0.126433785192909	0.125	0.0735294117647059	0.0652830188679245	0.112405063291139	0.0793182563094068	0.0772833723653396	0.122048997772829	0.123483535528596	0.130828581013083	0.131972789115646	0.166231221423906	0.1286456252497	0.107597112409763	0.0787878787878788	0.133025895707698	0.104536489151874	0.117958412098299	0.106988472622478
H4009_8_non	0.135123042505593	0.130870712401055	0.126571668063705	0.123881932021467	0.142309797482211	0.136202830188679	0.162270642201835	0.146399055489965	0.111418685121107	0.100958826847152	0.102323008849558	0.0992028343666962	0.0978972768011031	0.108422071636012	0.0935251798561151	0.105168539325843	0.158261582615826	0.147321428571429	0.15196471531676	0.159261108337494	0.141435306443164	0.125578086090359	0.14508233199822	0.154923939151321	0.139393939393939	0.118077579897536	0.1241768579492	0.131049483414899	0.142015933494977	0.132774472687939	0.131393048883865	0.129940443963184	0.0733374766935985	0.0736932305055698	0.164086687306502	0.092511013215859	0.090625	0.0928039702233251	0.12007874015748	0.14812030075188	0.166488222698073	0.163805436337625	0.160037002775208	0.152320507735026	0.0917910447761194	0.131785995279308	0.138421249532361	0.135483870967742	0.113985448666128
H4009_9_non	0.103622577927548	0.115230460921844	0.0862406899255194	0.108927808628791	0.124352331606218	0.114190687361419	0.138694009713977	0.120022123893805	0.0845951283739302	0.0976267529665588	0.101910828025478	0.0994427775396485	0.0922459893048128	0.0970873786407767	0.07958984375	0.0975820379965458	0.152596115735236	0.153195488721805	0.126953869614945	0.144148430066603	0.127617148554337	0.118883528600965	0.118315789473684	0.123391370174111	0.105902192242833	0.103334121541736	0.109007981755986	0.106965823115053	0.114408176722717	0.118031928814446	0.1130174291939	0.115566037735849	0.0760998810939358	0.0742738589211618	0.130109383995394	0.0729568572430726	0.0827261037291042	0.0953978906999041	0.120132953466287	0.117563234770217	0.132132132132132	0.147129597799931	0.120674740484429	0.102176318701586	0.0803633822501747	0.120363361090083	0.104593639575972	0.111882400979992	0.0995352439969016
H4010_1_UC	0.203498150016818	0.1391771019678	0.177455004736344	0.183877415056629	0.179932101093927	0.143297380585516	0.157299132402867	0.115140186915888	0.164886332511641	0.0987518355359765	0.106088224571637	0.12555910543131	0.144637053087757	0.139582620595279	0.101877607788595	0.139693910778248	0.241490044958253	0.26025536538984	0.234700315457413	0.21627486437613	0.171335030920335	0.186847304544172	0.176815369586454	0.200244573524916	0.199943358821863	0.198380566801619	0.211698584512906	0.192889908256881	0.175291248984015	0.253895948213858	0.231990231990232	0.241371102118543	0.0691386635766705	0.127105179536066	0.167466027178257	0.154310344827586	0.130801687763713	0.143511988716502	0.206620589305202	0.261164151524484	0.198362486043915	0.255480853551593	0.233148019457957	0.201949436491014	0.0811744386873921	0.235572374645222	0.231233041905336	0.248643147896879	0.189909119398308
H4010_2_UC	0.192963752665245	0.0671296296296296	0.139246542680019	0.239641657334826	0.0889159561510353	0.0640522875816993	0.104153354632588	0.0565916398713826	0.127758420441347	0.0455407969639469	0.0707964601769911	0.0566311713455954	0.0792819745699327	0.0903614457831325	0.0350877192982456	0.177111716621253	0.0542570951585977	0.0526483726866624	0.052760736196319	0.0563968668407311	0.0585585585585586	0.0509904622157007	0.0532654006484484	0.0598360655737705	0.072962962962963	0.0482016148764375	0.0516310725181882	0.0471928397070789	0.0530382859149982	0.101047268610246	0.0671082949308756	0.0725159147522834	0.0484581497797357	0.265481651376147	0.0828767123287671	0.058102766798419	0.0535626535626536	0.0837129840546697	0.254441624365482	0.0563650306748466	0.0718358038768529	0.0664020209310718	0.0924826904055391	0.0781961108812578	0.0591446769790719	0.189114391143911	0.190972222222222	0.204837879567679	0.302757158006363
H4010_3_UC	0.153762268266085	0.0398550724637681	0.105314480741102	0.171332586786114	0.0618228170809433	0.0293916609706083	0.0635761589403974	0.0396445659603554	0.0940807526460212	0.0295897780766644	0.0557421087978509	0.0330827067669173	0.0590038314176245	0.0729047072330654	0.0166765932102442	0.148169014084507	0.0406926406926407	0.0392541707556428	0.035472972972973	0.0331521739130435	0.0371681415929204	0.0461479786422578	0.0371084337349398	0.0449533502968617	0.0579489134578727	0.0324981394194989	0.0351460460698171	0.0305953693495039	0.0408975750995295	0.0796561604584527	0.050733137829912	0.0548060708263069	0.0398089171974522	0.190068493150685	0.0428877769835597	0.0441356763383735	0.0337423312883436	0.107587064676617	0.206111833550065	0.045671167593328	0.0445632798573975	0.0453874538745387	0.0763280041258381	0.065180102915952	0.042	0.142857142857143	0.144478393714535	0.15753781950965	0.202988150437919
H4010_4_UC	0.168324711500199	0.152834467120181	0.153587443946188	0.151443258204824	0.184373511195808	0.160099750623441	0.166907166907167	0.119560019129603	0.132685069008783	0.120591039084843	0.128834355828221	0.133805588351043	0.130599369085174	0.154572778016316	0.12161562361296	0.133227597145123	0.259375	0.24945295404814	0.239863584691171	0.255073800738007	0.186924493554328	0.161721552005217	0.180301826846704	0.181720043181	0.178302196001311	0.175831956573047	0.184312828721701	0.177427685950413	0.167035048942217	0.215686274509804	0.213281895839074	0.207233368532207	0.063	0.0991297767688233	0.172928461142563	0.12876254180602	0.134530938123752	0.138791593695271	0.193663543061133	0.233214285714286	0.212605832549389	0.22707423580786	0.234919286321155	0.184653997848691	0.0888888888888889	0.1792656587473	0.181194234728895	0.224415793714746	0.143530264588619
M2008_10_CD	0.204712812960236	0.146613545816733	0.187716863289382	0.226586102719033	0.176814011676397	0.135181236673774	0.172823779193206	0.111249481112495	0.17505209883894	0.123797574236721	0.13524760715772	0.146471846044191	0.153619776339023	0.167052469135802	0.122304978439828	0.210306934444865	0.196236559139785	0.203611111111111	0.172189733593242	0.175769230769231	0.167000400480577	0.162492546213476	0.174298899538516	0.18378024852845	0.174484613086346	0.170849845882871	0.172157279489904	0.169374104156713	0.167680278019114	0.217907494434826	0.192201257861635	0.200244498777506	0.0769903762029746	0.178117048346056	0.133015597920277	0.127278250303767	0.119802677942213	0.14324639937719	0.238075657894737	0.172339108910891	0.163273453093812	0.177390791027155	0.194035346097202	0.16816431322208	0.0827586206896552	0.209645010046885	0.20433535224737	0.230853391684902	0.215106160807518
M2008_11_CD	0.183697813121272	0.145454545454545	0.182608695652174	0.200406504065041	0.153354632587859	0.131994261119082	0.176442536957558	0.106363214119833	0.153870458135861	0.12406015037594	0.150354609929078	0.14140625	0.143172500788395	0.169665809768638	0.123851203501094	0.202405640812941	0.185978932074101	0.181738366988586	0.167371388301621	0.164418212478921	0.179198559207564	0.168991242296464	0.1852871754524	0.184538653366584	0.170637475853187	0.154712643678161	0.143984220907298	0.15	0.161641280696301	0.197051978277735	0.179405520169851	0.189481825212684	0.0706521739130435	0.163966811536942	0.140609636184857	0.137908061292472	0.134146341463415	0.14819643633203	0.210878288007133	0.146701673777486	0.140679442508711	0.147204968944099	0.168450257629806	0.139305177111717	0.0709060213843557	0.20530523255814	0.186307901907357	0.205951448707909	0.181079083518108
M2008_12_CD	0.180504466631634	0.12055768179333	0.182883341823739	0.182275132275132	0.133763320246775	0.102185637240988	0.130570536474596	0.094329028635598	0.186137250401653	0.100225225225225	0.110205229125668	0.128400711924739	0.157622157171808	0.139254091762812	0.122594832325454	0.1735778841042	0.179620034542314	0.19286941580756	0.160817307692308	0.156528791565288	0.141949737641535	0.17918010133579	0.169377743351407	0.18885068762279	0.203457136183135	0.193901771042542	0.18549806406195	0.180467091295117	0.160371106693174	0.221912905150129	0.176006314127861	0.194466095089634	0.0492877492877493	0.172667542706965	0.101033295063146	0.136929460580913	0.114235055724417	0.115044247787611	0.183776223776224	0.160528144544823	0.128548034934498	0.141042487954446	0.163105784262637	0.173021235521236	0.0588417466707959	0.177631578947368	0.184597156398104	0.17997432605905	0.194120628484541
M2008_13_CD	0.2075260804769	0.128418549346017	0.195629185759605	0.217638152914459	0.156172328086164	0.13209982788296	0.149894736842105	0.102959566486036	0.156526875369167	0.0827558092132083	0.107597535934292	0.103185595567867	0.120749279538905	0.129811320754717	0.0896498653328203	0.180664427025009	0.186617350369872	0.2	0.175098554533509	0.161612284069098	0.140427215189873	0.158083832335329	0.146204966771598	0.164125851443399	0.149764150943396	0.16607851786502	0.168051118210863	0.159199237368923	0.143142857142857	0.208745059288538	0.196746314184037	0.201477832512315	0.0578764142732811	0.185814554857776	0.136323658751099	0.128142244022072	0.113982300884956	0.134713002733307	0.254208754208754	0.193773824650572	0.149980055843638	0.194327097163549	0.198507462686567	0.145350682323072	0.0733036156513125	0.229739010989011	0.22892751721876	0.282208588957055	0.249097472924188
M2008_14_CD	0.201677607585704	0.135420743639922	0.183379120879121	0.225093632958801	0.159804321239299	0.119683069224354	0.163811115754283	0.105198526401965	0.173861620342992	0.120760959470637	0.135838150289017	0.134453781512605	0.148558112438101	0.160700685453161	0.120341614906832	0.215338118624858	0.179006252056598	0.191466083150985	0.171290322580645	0.167551175132676	0.159952606635071	0.159326041974579	0.165908295414771	0.182408308990587	0.165683962264151	0.153065630397237	0.156883225402131	0.155273666901574	0.155270655270655	0.21518054532056	0.190202449387653	0.198833252309188	0.0665236051502146	0.198237885462555	0.129280821917808	0.128437594439408	0.115331010452962	0.138023836985775	0.244973327862126	0.16254955779201	0.152668759811617	0.16256157635468	0.185050798258345	0.153700787401575	0.0781553398058252	0.214906417112299	0.215153452685422	0.24014598540146	0.244334277620397
M2008_16_CD	0.2120067170445	0.130099728014506	0.191372549019608	0.243161094224924	0.158820732287209	0.127227722772277	0.154443904808159	0.104046242774566	0.149032258064516	0.0982824427480916	0.119980879541109	0.106682297772567	0.123292024149984	0.143847487001733	0.101823032458871	0.209732988802756	0.156227239621267	0.151020408163265	0.146567057986482	0.154211663066955	0.142792589245368	0.134280180761782	0.130754352030948	0.141093474426808	0.138728323699422	0.123946229209387	0.129707112970711	0.122448979591837	0.125964803951837	0.183572359843546	0.153377483443709	0.165979381443299	0.0569974554707379	0.223650385604113	0.130258489609731	0.107559107559108	0.102645084879589	0.135736537605696	0.272903538536112	0.146513977770293	0.136118598382749	0.143038376149699	0.169873106835858	0.137316561844864	0.0778834720570749	0.224203338391502	0.227568740955137	0.265876375952583	0.27504105090312
M2008_8_CD	0.209189001044205	0.135693215339233	0.197951090548579	0.216073316884032	0.156847742922724	0.137410643367752	0.150621118012422	0.105606758832565	0.162836322869955	0.0955631399317406	0.111954459203036	0.1162259222984	0.138674033149171	0.142705382436261	0.103709038530789	0.179986101459347	0.2	0.212242715851377	0.188026192703461	0.182081973159231	0.14348623853211	0.164064717570253	0.153466973381531	0.17239263803681	0.164881623449831	0.172223401996178	0.18095434827515	0.164762340036563	0.153992913600436	0.217577197149644	0.208363903154806	0.216904761904762	0.0584028605482718	0.167118644067797	0.133601609657948	0.127340823970037	0.114408176722717	0.129949604031677	0.237673343605547	0.211964773762527	0.159657610718273	0.211972238288028	0.206232492997199	0.165301789505611	0.0767160161507402	0.22282782943251	0.233725976441414	0.266194690265487	0.218409765753877
M2014_10_CD	0.161028893587033	0.140778607943374	0.14561170212766	0.15379188712522	0.162648140580302	0.139643463497453	0.141861418614186	0.114781172584641	0.129445234708393	0.0814046288906624	0.0925337569499603	0.0990502035278155	0.118264322178106	0.107960741548528	0.0821147356580427	0.098327074086719	0.18289864641796	0.214385280178422	0.183507170795306	0.174227983225315	0.123995407577497	0.140779522978476	0.126860622462788	0.14740157480315	0.161915956508963	0.169220665499124	0.190455717970765	0.171789373361925	0.158902543583881	0.20746887966805	0.201311806256307	0.211198428290766	0.0569970225435985	0.0811526995693938	0.148954703832753	0.126395173453997	0.108763422237617	0.115718055032039	0.147937949300038	0.217113665389527	0.186187399030695	0.235221674876847	0.217294073797987	0.177813504823151	0.0876591576885406	0.208846025939475	0.21944177093359	0.228488792480116	0.149869109947644
M2014_11_CD	0.143542309009935	0.136679536679537	0.127302100161551	0.116200740990232	0.15243415802075	0.149115417017692	0.127142287764049	0.118678629690049	0.115962180200222	0.0796078431372549	0.0816879597367402	0.0954287620954288	0.106914745903916	0.101960784313725	0.0896577380952381	0.0801855533465871	0.184193337687786	0.214857774095554	0.193244559922053	0.178046020369672	0.132218844984802	0.152616279069767	0.141021305377071	0.158390949088624	0.158550724637681	0.168656392446277	0.177674614897658	0.161554671037228	0.145973154362416	0.17855455833727	0.184372689179196	0.195913461538462	0.0555323590814196	0.0572250639386189	0.138912489379779	0.125111706881144	0.109439124487004	0.110166358595194	0.12586900841566	0.210361067503925	0.1640625	0.220282876918447	0.194153735113677	0.160300563556669	0.0801526717557252	0.187217559715946	0.191199256275178	0.201886133426476	0.119257394587791
M2014_12_CD	0.151315789473684	0.154510556621881	0.129353233830846	0.135378323108384	0.157635467980296	0.157505285412262	0.13534952900347	0.123853211009174	0.113068545803972	0.0778588807785888	0.0914368650217707	0.0918854415274463	0.100893997445722	0.0942991855979426	0.0858310626702997	0.078019801980198	0.170140204622963	0.186539643515673	0.175412293853073	0.170742753623188	0.130032392410921	0.136273209549072	0.128531635495424	0.145143688614041	0.151464713715047	0.160718562874251	0.183247301736274	0.174455655868295	0.152849740932642	0.182156133828996	0.180033185840708	0.179112410310922	0.059073975518893	0.0637725701114099	0.162147505422993	0.116511547742158	0.11495673671199	0.103401969561325	0.128444444444444	0.219485294117647	0.195301027900147	0.235335440814893	0.208987783595113	0.187406296851574	0.102171136653895	0.169895678092399	0.197392249185078	0.20757071547421	0.143560606060606
M2014_3_CD	0.141884531590414	0.084189497716895	0.144061100869107	0.0939385987929677	0.0771223021582734	0.0625741399762752	0.0810096859407103	0.0679726921935292	0.141918836500117	0.0403690888119954	0.0398974066685665	0.0653964984552008	0.128175250524353	0.0653347732181425	0.0447266703478741	0.0556695741405849	0.0958669601369528	0.112193056731583	0.101678423741182	0.0705059203444564	0.0458140169075539	0.112136594370097	0.0709040263357812	0.0987176385192354	0.123148148148148	0.114903502501787	0.130114135206321	0.106334411261176	0.0807331442286712	0.12490377213241	0.10915147952185	0.11771472392638	0.0270188221007893	0.0576874205844981	0.0625	0.0929683813119396	0.0680041688379364	0.0675152185943553	0.0746105493304181	0.128684399712437	0.0790658413055712	0.137891077636153	0.114262777629114	0.1300792864222	0.041750167000668	0.117603550295858	0.149743087839491	0.110651499482937	0.104933633859254
M2014_5_CD	0.113117870722433	0.0807345807345807	0.11030303030303	0.0818604651162791	0.0751140751140751	0.073594674556213	0.0778894472361809	0.0739786529260213	0.111170071637039	0.0464617583988563	0.0468970380818054	0.0679431747992588	0.106943335993615	0.0718739744010502	0.0437121721587088	0.0546515198035002	0.0894239036973345	0.100312725523214	0.0906772456786625	0.0659340659340659	0.0558902275769746	0.111707841031149	0.0783956244302644	0.100940975192472	0.117300482056776	0.123030303030303	0.127301214257736	0.123851203501094	0.1072816791915	0.109321305841924	0.10789766407119	0.119808654055229	0.0336520076481836	0.0513285024154589	0.0781426953567384	0.124964417876459	0.107906675307842	0.0996539792387543	0.0644844517184943	0.11387506909895	0.0801095515234509	0.132833422603107	0.105329949238579	0.112034383954155	0.0423076923076923	0.10369521627041	0.132112676056338	0.105134474327628	0.0893169877408056
M2014_6_CD	0.11524064171123	0.0809959931310819	0.115354838709677	0.0810740354535975	0.0779258400926999	0.0690483338336836	0.0720351390922401	0.0810157194679565	0.126976744186047	0.0352193995381062	0.0348074179743224	0.0575539568345324	0.0944810356575062	0.0475173518419648	0.0349381017881706	0.0425369332654101	0.113080379430854	0.141859450021825	0.113664442797134	0.0735413839891452	0.0588725354068314	0.12549847525217	0.088768115942029	0.112506154603644	0.123517096999302	0.135732553891122	0.145152651312266	0.126141885325559	0.104614695340502	0.126741486068111	0.116435643564356	0.134596600898613	0.0351093316907915	0.044663133989402	0.0805658056580566	0.121654501216545	0.0965572888649812	0.0879183210436756	0.0685979775895053	0.136209403780902	0.0810887439750496	0.158843053579896	0.115239633817986	0.123793018073781	0.0413584398117014	0.117413921228635	0.140453547915143	0.105535437144335	0.095309381237525
M2014_7_CD	0.0821632865314613	0.0821039127645927	0.0767004341534009	0.0820620725933719	0.0968392737054472	0.0800293685756241	0.0730874316939891	0.0830903790087464	0.0799373040752351	0.0550070521861777	0.0385135135135135	0.0326197757390418	0.0484056857472148	0.0485991995425958	0.0245098039215686	0.0324742268041237	0.0700090334236676	0.0830748017924853	0.06805125939019	0.0590238365493757	0.0603076923076923	0.0686661404893449	0.0585	0.0719329214474846	0.0881652104845115	0.0705577172503243	0.0783042394014963	0.0786255096097845	0.0855941918226977	0.0754825698645923	0.0709326894053728	0.0644145433724592	0.0400981996726678	0.0358767054067711	0.119496855345912	0.0732538330494037	0.0740540540540541	0.0738007380073801	0.0661980082015231	0.0793518903199003	0.103779628443306	0.106366152629498	0.100268096514745	0.102656461053579	0.105378704720088	0.0876010781671159	0.0985138004246285	0.0892768079800499	0.0874704491725768
M2014_8_CD	0.140869565217391	0.120531477380576	0.149325084364454	0.12867859203693	0.138843515191114	0.112002674690739	0.110894941634241	0.103004291845494	0.149588631264024	0.0695818704117459	0.0653266331658292	0.0828683035714286	0.115328467153285	0.0869180907483795	0.0684641017873372	0.066334991708126	0.169435215946844	0.216407010710808	0.177508269018743	0.137572607765209	0.0995697602950215	0.15636087176888	0.115103874227962	0.143009605122732	0.163880445795339	0.176401179941003	0.197016660209221	0.175761421319797	0.143970767356882	0.194017094017094	0.187994722955145	0.198494623655914	0.0511096166778749	0.0559762033531639	0.124871355060034	0.143790849673203	0.118811881188119	0.104601226993865	0.108262967430639	0.206448117041452	0.149373594603277	0.227380638353996	0.175744808907614	0.176599234554401	0.0783722682743029	0.153182308522114	0.176065660577178	0.163306451612903	0.126016260162602
M2014_9_CD	0.157330154946365	0.154445462878093	0.130210254518628	0.132941176470588	0.17174119885823	0.172606924643585	0.148112756808409	0.132942326490714	0.113594040968343	0.0898876404494382	0.0952380952380952	0.113361901051811	0.120868744098206	0.112223612849395	0.0939274792485802	0.0903846153846154	0.179439941046426	0.19915509957755	0.179310344827586	0.180227471566054	0.140116019634092	0.154975530179445	0.137292711145391	0.147835269271383	0.153374233128834	0.149779735682819	0.168631006346328	0.154492237210486	0.155394778232148	0.192217289109428	0.187957689178194	0.194852941176471	0.0669710806697108	0.0681986656782802	0.168911917098446	0.124454880912445	0.122213375796178	0.109294320137694	0.137709137709138	0.208171891511095	0.187819618781962	0.227595536016233	0.204175365344468	0.178943586058211	0.102517985611511	0.183770014556041	0.187565126780132	0.196350654502182	0.137254901960784
M2021_1_CD	0.162868632707775	0.156825874388868	0.164683177870698	0.162618083670715	0.166924265842349	0.15836371000405	0.152199299338264	0.147246608140463	0.153632062343446	0.107060629316961	0.106238185255198	0.109486679662118	0.128528363935325	0.118320610687023	0.109057971014493	0.101656381942189	0.205646454924607	0.196777601690438	0.189746795873711	0.193619361936194	0.179234558544903	0.193069306930693	0.194955691888207	0.211294416243655	0.220875221762271	0.212840809146878	0.234709314890858	0.235265583313122	0.224312590448625	0.237796036732721	0.206205717077938	0.204765274828969	0.0678442392613408	0.0913995556966043	0.179454926624738	0.141647196261682	0.126835781041389	0.128103634400864	0.127547434996486	0.207815813389882	0.177004538577912	0.211866859623734	0.183694530443756	0.200125078173859	0.0876078075351793	0.155595996360328	0.174246898995865	0.156685011330528	0.148505603985056
M2021_2_CD	0.193177604746014	0.174220374220374	0.195953141640043	0.224223840551936	0.179880647911338	0.167412712623098	0.179956427015251	0.135989605889996	0.174358974358974	0.123772940674349	0.135456475583864	0.130046445158985	0.143786982248521	0.161908486507626	0.125851703406814	0.169459962756052	0.194955691888207	0.18269762299613	0.183877415056629	0.197846031112884	0.170212765957447	0.143664485425342	0.162142857142857	0.173798551678736	0.196604938271605	0.200729927007299	0.223068309070549	0.220317620368036	0.21875	0.261658031088083	0.216567125421968	0.210421341311394	0.0706980880391285	0.139027877055039	0.166742596810934	0.149277184160905	0.134762077733382	0.147234381217668	0.178557194101236	0.181214421252372	0.177924217462932	0.167655786350148	0.188152011922504	0.183107885186407	0.0844714213454729	0.181274900398406	0.203619909502262	0.205007256894049	0.175846732808758
M2021_3_CD	0.156006914433881	0.179420889348501	0.164400494437577	0.15311004784689	0.179745493107105	0.171298922291548	0.185002736726875	0.148536720044174	0.151202749140893	0.126684636118598	0.134113890367217	0.124946328896522	0.128736413043478	0.150165798199905	0.146761133603239	0.115549828178694	0.191874497184232	0.164951668225756	0.190589165678134	0.198830409356725	0.18274629913221	0.148921363952679	0.176649305555556	0.187352710133543	0.190714285714286	0.171754777860511	0.178528636472562	0.185655172413793	0.187348772900104	0.193984547461369	0.161199887860948	0.157894736842105	0.0817865429234339	0.0970954356846473	0.172574084834399	0.133187772925764	0.121686223381139	0.124459394521864	0.122790697674419	0.164963503649635	0.160821643286573	0.141318977119785	0.165638766519824	0.176265945110166	0.101858224363386	0.124161073825503	0.13122332859175	0.118357487922705	0.118670274449169
M2021_5_CD	0.173348181143281	0.182984181274049	0.208318132068588	0.147822905232345	0.19374724790841	0.172873563218391	0.178222222222222	0.155855855855856	0.181762168823167	0.15	0.133882149046794	0.156797020484171	0.185496420790538	0.168872843963097	0.183655913978495	0.140584535701073	0.26383290582631	0.222350897510133	0.261544011544012	0.260590500641849	0.206629358588033	0.190446260213702	0.217440974866717	0.213347164591978	0.228690897394661	0.185834661808244	0.188214599824098	0.18211020509019	0.16627007733492	0.210513078470825	0.176111817026684	0.180610236220472	0.0652469415496149	0.100175746924429	0.157116451016636	0.138159974707556	0.133407243163341	0.127243717590746	0.127527216174184	0.206692913385827	0.180210526315789	0.165614667868951	0.186813186813187	0.209804593760713	0.0785529715762274	0.135214007782101	0.136701797892126	0.131369150779896	0.105297580117724
M2021_6_CD	0.159183673469388	0.165506573859242	0.166885245901639	0.142085723928451	0.184147317854283	0.157633429871742	0.169963665724667	0.14957090314671	0.160272804774084	0.133279807306303	0.12755905511811	0.137381275440977	0.152927799886299	0.143632416787265	0.13900493733384	0.129579375848033	0.244444444444444	0.247627024008934	0.237685950413223	0.225249424405219	0.187232386142468	0.177071178529755	0.188405797101449	0.187480240278217	0.184678124089717	0.173913043478261	0.184944432795135	0.165392633773454	0.169472502805836	0.232943469785575	0.204595997034841	0.211575408261287	0.0717821782178218	0.0918202392499192	0.165184243964422	0.123539719626168	0.124533423820835	0.12853470437018	0.143531976744186	0.208435960591133	0.173979984603541	0.208614122472898	0.194414987628137	0.181476846057572	0.0795559666975023	0.139209726443769	0.130233901241698	0.13882581900746	0.110192837465565
M2024_1_UC	0.199272065514104	0.120439780109945	0.17396798652064	0.253960633701392	0.138541666666667	0.121816168327796	0.1529284164859	0.108636610537751	0.159313725490196	0.089798087141339	0.116924719701014	0.0992333901192504	0.109834403514701	0.133301707779886	0.0789728682170543	0.199812382739212	0.140405616224649	0.124049863180298	0.131759329779132	0.142520056630486	0.148185483870968	0.122077028885832	0.149247311827957	0.141545524100995	0.145688456189152	0.115558732427925	0.10660013608528	0.121675006584145	0.13124583610926	0.156730509846237	0.125342841470104	0.137949400798935	0.0753828032979976	0.242250834525513	0.119977362761743	0.107708933717579	0.101386481802426	0.12960235640648	0.249342451341399	0.0820178448867536	0.0978313253012048	0.0872243839169909	0.115532734274711	0.0987564008778347	0.0742778541953232	0.210248068320455	0.20337035618537	0.222222222222222	0.256602112676056
M2025_1_CD	0.203774792066539	0.141260162601626	0.192565508836076	0.189627744193446	0.162048404068748	0.142805364262414	0.151096956829441	0.125399644760213	0.183782341957855	0.0898491083676269	0.0986348122866894	0.10291493158834	0.139793281653747	0.129820051413882	0.101477832512315	0.126566799143993	0.190070505287897	0.187007874015748	0.188460423311105	0.17211760819293	0.138795986622074	0.177891065199893	0.16177370030581	0.182001150086256	0.232441471571906	0.215017778707383	0.222470995318543	0.20816509645581	0.182174594877156	0.250577367205543	0.222533894343151	0.234285714285714	0.0531383737517832	0.11769991015274	0.145280235988201	0.154078549848943	0.136265097553422	0.129861568885959	0.167333333333333	0.220764403879064	0.174137931034483	0.2177222071215	0.20919689119171	0.215357458075905	0.0704617834394904	0.188930744711678	0.235243055555556	0.215341087708268	0.17221077421254
M2025_3_CD	0.198834418923552	0.164352720450281	0.194499017681729	0.184111830889874	0.190234375	0.173577235772358	0.174135220125786	0.135367762128326	0.167646235656311	0.108488770460601	0.121534371439423	0.119349593495935	0.135616438356164	0.144769284959493	0.113193943763518	0.144626715768329	0.224126778783959	0.221329046087889	0.217211813274055	0.213757396449704	0.185870797128825	0.183017785427424	0.20580204778157	0.205707118218877	0.231042654028436	0.226870296591412	0.216101694915254	0.214421252371917	0.219072164948454	0.262009803921569	0.252270433905146	0.264532019704434	0.0679650238473768	0.125690159142579	0.174524400330852	0.176329946204423	0.168612637362637	0.166789667896679	0.178441369264385	0.209036144578313	0.173896783844428	0.189723320158103	0.208362369337979	0.187039312039312	0.0797682709447415	0.202444374804137	0.207541478129713	0.213755900202293	0.169288860918817
M2025_4_CD	0.159726538222498	0.173699015471167	0.160837070254111	0.154420921544209	0.17381974248927	0.160594795539033	0.160662824207493	0.147403072421361	0.155479811221814	0.108879492600423	0.11938202247191	0.127914110429448	0.139438085327784	0.135549038774845	0.134904371584699	0.119485294117647	0.23730378578024	0.220213849287169	0.224932249322493	0.219064124783362	0.193491333569155	0.180980764020591	0.220602526724976	0.217910447761194	0.249573136027319	0.259646827992152	0.242462050322312	0.252045826513912	0.246047156726768	0.24860853432282	0.229950319375444	0.24024024024024	0.0633187772925764	0.0885294117647059	0.170091324200913	0.172617374191735	0.167522464698331	0.141848739495798	0.126948051948052	0.207445296959363	0.185940246045694	0.195004029008864	0.20032414910859	0.216256303767428	0.0787337662337662	0.145428973277075	0.170071783545003	0.156862745098039	0.12116912599319
M2025_7_CD	0.175940317065589	0.153113303844845	0.160129755234444	0.166304685076016	0.186543253826985	0.15088864708016	0.161874334398296	0.128495575221239	0.163057657187582	0.109261186264308	0.112676056338028	0.11951951951952	0.132379248658318	0.136246786632391	0.102974828375286	0.12136803874092	0.213774597495528	0.219229801157815	0.189774696707106	0.188145188145188	0.177785419532325	0.168831168831169	0.193810565801813	0.192551963048499	0.213329691341164	0.216148549968704	0.215409439290036	0.204008908685969	0.198364547612767	0.249138129165709	0.23442276040442	0.261638733705773	0.0686556434219986	0.105480259281084	0.159065628476085	0.160846851800935	0.150655021834061	0.145134506808369	0.152864157119476	0.205494813568825	0.17053998632946	0.20870265914585	0.198212575805937	0.183632734530938	0.0853365384615385	0.176319543509272	0.185134014921249	0.179004854368932	0.147362385321101
M2026_1_UC	0.151919866444073	0.0326555760936537	0.0957079427725703	0.207792207792208	0.036468330134357	0.0160055671537926	0.0476830087306917	0.0264439805149617	0.0936254980079681	0.0305343511450382	0.0545957152729786	0.0333333333333333	0.0498261877172654	0.0642148277875073	0.0177696078431373	0.175914994096812	0.0207792207792208	0.0202020202020202	0.0100755667506297	0.015881708652793	0.026994601079784	0.017351942663146	0.0228266148615833	0.0228426395939086	0.031758034026465	0.0173010380622837	0.018417945690673	0.0173553719008264	0.0216606498194946	0.0603988603988604	0.0311953352769679	0.0377939529675252	0.0310965630114566	0.277568922305764	0.0165467625899281	0.038063715349607	0.024364955935718	0.0637645616186389	0.232288828337875	0.0145098039215686	0.0184414039262344	0.0246323529411765	0.0413265306122449	0.0317393144308083	0.0152905198776758	0.141098484848485	0.14795008912656	0.165772532188841	0.267441860465116
M2026_2_UC	0.157322654462243	0.0415601023017903	0.105798575788403	0.22638036809816	0.0521739130434783	0.0328947368421053	0.0625	0.0492285084496694	0.0998777007745618	0.0604719764011799	0.06941431670282	0.0468085106382979	0.0536489151873767	0.0809494826536823	0.0273711012094207	0.195451751690227	0.0316964285714286	0.035594358629953	0.0243161094224924	0.0301994301994302	0.0393258426966292	0.0267338240991864	0.0351935646053293	0.0313179643323184	0.0395348837209302	0.020822880080281	0.0227763126348597	0.0224340998317443	0.0311226380140793	0.0692464358452139	0.0380725758477097	0.0463121783876501	0.035866780529462	0.260759493670886	0.0435446906035141	0.0388185654008439	0.0332083556507766	0.0772176132737715	0.256776034236805	0.0254339927331449	0.0399750156152405	0.0359168241965974	0.0555849655902594	0.0413763066202091	0.0382932166301969	0.152120916626036	0.152164009111617	0.182424916573971	0.25531914893617
M2026_3_UC	0.170542635658915	0.0643564356435644	0.128550074738416	0.234494979326639	0.0812215724496426	0.0651558073654391	0.0889341479972845	0.0570633263743911	0.120980707395498	0.0798022598870056	0.0994397759103641	0.0729546638874414	0.074290159471023	0.104733727810651	0.053770086526576	0.200471698113208	0.0586161304539445	0.0534173855341739	0.047008547008547	0.0656565656565657	0.0900062073246431	0.0526113671274962	0.0723192019950125	0.0658008658008658	0.0723124516627997	0.0486513738341316	0.0513996138996139	0.0544582392776524	0.0652335063009637	0.0906458152331306	0.060408646727865	0.0632086167800454	0.0499194847020934	0.257850241545894	0.084077380952381	0.0523495465787304	0.0509885535900104	0.0827754108338405	0.256271186440678	0.0432196669310071	0.066180935033394	0.0520252694165738	0.0825545171339564	0.0693666523050409	0.0452261306532663	0.170243204577969	0.188747731397459	0.207516339869281	0.254301075268817
M2026_4_UC	0.211139240506329	0.111853088480801	0.171889400921659	0.252910052910053	0.129726585223967	0.120754716981132	0.131009615384615	0.0997552019583843	0.146970830216904	0.0971463266545234	0.110576923076923	0.0905272981801213	0.101449275362319	0.139139670738184	0.0812431842966194	0.222398309561543	0.117597998331943	0.101786853860881	0.101332256762212	0.118705035971223	0.121897407611693	0.0938405797101449	0.103134938664244	0.108862808579522	0.119222303741746	0.0837606837606838	0.0903316866619619	0.0892566467715681	0.111816578483245	0.138513513513514	0.113708513708514	0.108695652173913	0.061744966442953	0.240021008403361	0.136959370904325	0.0801220908050362	0.0748362956033676	0.115509761388286	0.299390243902439	0.112853863810252	0.142696629213483	0.126449275362319	0.147087378640777	0.128372853638594	0.081214109926169	0.237879474399638	0.244310863031344	0.257560483870968	0.276772616136919
M2026_7_UC	0.227476356396217	0.115778136779752	0.17301658449126	0.257466529351184	0.131948343627176	0.109384339509863	0.125431530494822	0.096074985354423	0.16939687267312	0.107773851590106	0.124634289057929	0.104443426477325	0.125406577520781	0.153326403326403	0.102949061662198	0.222734254992319	0.105580088317945	0.0892526250772082	0.104889589905363	0.123253493013972	0.115343915343915	0.0856440856440856	0.107569721115538	0.109184075679937	0.136363636363636	0.0835734870317003	0.0923219670610067	0.0909818569903949	0.101775956284153	0.141352549889135	0.101989352759877	0.101772287862513	0.0615384615384615	0.293149229952204	0.127102803738318	0.0863874345549738	0.0737890448166591	0.11337513061651	0.270161290322581	0.101957886959734	0.141310232809962	0.109445799930289	0.138253152732368	0.146904087414002	0.0757341576506955	0.2053264604811	0.237817576009996	0.238072289156627	0.291486291486291
M2027_1_CD	0.0896974063400576	0.104997900041999	0.0722484807562458	0.0992673992673993	0.0971452918619514	0.0907859078590786	0.131354026090868	0.0824053452115813	0.0752688172043011	0.0786914235190097	0.101198402130493	0.100407558354946	0.0866863905325444	0.106332138590203	0.0747740345110929	0.091885883660615	0.115112756647593	0.117309269893355	0.0901719104768083	0.105428796223446	0.114500626828249	0.087552114353782	0.0991023339317774	0.11026991441738	0.0954504906333631	0.0945391754802504	0.102092050209205	0.102205359260138	0.124146124146124	0.162854301342616	0.178693256363159	0.156536839493922	0.0836594911937378	0.0781418797263234	0.103962703962704	0.0798004987531172	0.0700985761226725	0.0842402257154373	0.0946534653465347	0.0921985815602837	0.114035087719298	0.12744802651401	0.0994495412844037	0.10233918128655	0.0620577027762656	0.101112565445026	0.1	0.0963897651594812	0.103776794828173
M2027_2_CD	0.115384615384615	0.0974395448079659	0.0900630441308916	0.0823676792984654	0.111926605504587	0.0945842868039664	0.116541353383459	0.0862198795180723	0.100370762711864	0.0647296800294226	0.0825958702064897	0.0873015873015873	0.0961232076473712	0.0841716968477532	0.0741518013291361	0.0793147208121827	0.14251061249242	0.163464002049705	0.155663234403392	0.132500867152272	0.0844043070510594	0.109400324149109	0.0939639079029247	0.106998264893002	0.104027740730862	0.122942491363544	0.14163175743068	0.116630196936543	0.105318039624609	0.187962962962963	0.198401162790698	0.193051993471672	0.0540860639557837	0.0622112719433323	0.106191222570533	0.0886111111111111	0.0766295707472178	0.0755813953488372	0.106185567010309	0.173861967694567	0.134447674418605	0.1809229037704	0.158442430345754	0.134099616858238	0.0557261956998684	0.113053613053613	0.11997752177578	0.129927467675812	0.100565307944064
M2027_3_CD	0.126009693053312	0.103534451981435	0.107861060329068	0.142244224422442	0.11539875045939	0.100689127105666	0.135062953071347	0.0980243161094225	0.106088806168572	0.0935143288084465	0.115282518012893	0.117992177314211	0.119750745055541	0.115782219159201	0.0808151791988756	0.128893306825712	0.140568319226119	0.15556685307575	0.127804014167651	0.131487889273356	0.114795008912656	0.105079279763504	0.107232704402516	0.122729935559461	0.110694183864916	0.120770010131712	0.12203721841332	0.114310645724258	0.132604055496265	0.203890321068667	0.217605114334891	0.210874704491726	0.07	0.0940766550522648	0.12	0.101628298708591	0.092109500805153	0.102555127756388	0.14204746723344	0.129551227773074	0.128880866425993	0.152495885902359	0.136842105263158	0.114227877385772	0.0639894086496028	0.151761517615176	0.131877481565513	0.150368707919205	0.129957291031117
M2027_5_CD	0.0875853756528726	0.107758620689655	0.0793051359516616	0.0893219650832318	0.105830475257227	0.114832535885167	0.136575271598551	0.088659793814433	0.0763844684914067	0.0854219948849105	0.109230769230769	0.0999585234342596	0.0885788449059053	0.107609185051778	0.0937648738695859	0.0935940099833611	0.11421130952381	0.108887580929959	0.107753913360029	0.121007647323437	0.106974552309142	0.0867014341590613	0.0945730247406225	0.110505270810614	0.100719424460432	0.0893880357552143	0.0912698412698413	0.0912298387096774	0.11694587628866	0.14589905362776	0.178430265386787	0.157474020783373	0.0717514124293785	0.0614835382784609	0.118995633187773	0.0766598220396988	0.0815397350993377	0.083599817268159	0.0875944864384171	0.0995907230559345	0.104891815616181	0.0977877524847708	0.103419859909353	0.0982142857142857	0.0673202614379085	0.0870495897252943	0.0771035869929601	0.0899922420480993	0.0801033591731266
M2027_6_CD	0.108213312572986	0.118049225159526	0.0945600584154801	0.1031652989449	0.121665886757136	0.116824762855716	0.141670737664875	0.0926734594856866	0.0867016352977476	0.0791984732824427	0.104556354916067	0.102685624012638	0.0921875	0.110162254483348	0.0991884580703336	0.0936018957345972	0.141244994539498	0.128175519630485	0.137598284488921	0.139393939393939	0.118651685393258	0.102857142857143	0.109272797229704	0.120266479663394	0.119770041520281	0.122247706422018	0.123124448367167	0.125377643504532	0.137496058025859	0.180530044607715	0.205027932960894	0.187185597034684	0.0732349841938883	0.0731707317073171	0.128865979381443	0.0916943521594684	0.0847123719464145	0.0832255282449332	0.102771855010661	0.127723768018773	0.133940774487472	0.128562381253958	0.124501197126895	0.117872044506259	0.0725952813067151	0.102386717398824	0.109897384971864	0.110274745954084	0.0981375358166189
M2028_1_CD	0.158233276157804	0.162216624685139	0.155591572123177	0.14450619923044	0.186610437532947	0.177364864864865	0.17416934619507	0.160330578512397	0.140925988509632	0.114857744994731	0.118775933609959	0.120711562897078	0.119692410565028	0.127239320165365	0.112081513828239	0.109090909090909	0.2106115836371	0.190506329113924	0.189580885233059	0.201546640889319	0.200922603792927	0.182238010657194	0.197287839020122	0.196624803767661	0.189380530973451	0.154706883969837	0.155140186915888	0.160805369127517	0.174813306177868	0.200827586206897	0.190516995144244	0.183951965065502	0.079337899543379	0.0911319983653453	0.196021064950263	0.121028204212781	0.121772805507745	0.118147448015123	0.146077970878347	0.171033478893741	0.17916456970307	0.181064270905321	0.183348095659876	0.156803618545043	0.106050305914344	0.160687022900763	0.14331550802139	0.16979557780559	0.129593810444874
M2028_2_CD	0.144364710848459	0.18274629913221	0.15729882733522	0.166739036039948	0.189374013677012	0.173743016759777	0.198149156232989	0.156284153005464	0.142375168690958	0.144241119483315	0.150823154540627	0.15377932232841	0.144853442399455	0.176695319961796	0.168527918781726	0.136873920552677	0.220097640358015	0.177645956915392	0.186064616582328	0.231984205330701	0.241688654353562	0.169996494917631	0.229632945389436	0.219210840972499	0.21266642677222	0.142960115329169	0.140161104718067	0.156041611096292	0.180612244897959	0.195670046588106	0.188958451906659	0.183451279259662	0.0912743972445465	0.112494811124948	0.199766355140187	0.118607954545455	0.119811724433034	0.12022630834512	0.129032258064516	0.153269024651661	0.170646766169154	0.142285904698434	0.164567954841511	0.157083803081548	0.10832769126608	0.138857782754759	0.12640056022409	0.12514994002399	0.115765422696116
M2028_4_CD	0.153633004926108	0.145933014354067	0.181212121212121	0.125453446191052	0.168734491315136	0.13412870571222	0.143816254416961	0.131777378815081	0.193844492440605	0.107530647985989	0.0999313186813187	0.11641971575446	0.149019607843137	0.126488574187319	0.128083812098682	0.102132772604386	0.242685555897752	0.228724763608485	0.22870899789347	0.218771566597654	0.180424939045629	0.234895539243365	0.223479948253558	0.23454929152849	0.249574588769144	0.213447842480101	0.194416749750748	0.199731903485255	0.174003646783016	0.223985490818409	0.189867640346874	0.194321206743567	0.061822125813449	0.0906956266510126	0.144868469803631	0.135648399348888	0.119178921568627	0.107432651736449	0.109484404837683	0.168859649122807	0.13877688172043	0.156776366934439	0.165882721856381	0.171363506974096	0.0804365400161682	0.135593220338983	0.144818304172275	0.136363636363636	0.103812969663234
M2039_1_non	0.162007986309184	0.141085271317829	0.153741125068269	0.150241408690713	0.158197507190796	0.14777998674619	0.143040410519564	0.122620200064537	0.14821083172147	0.0818604651162791	0.0952528699968973	0.116699083078633	0.132374100719424	0.11056297156123	0.0969769530080814	0.0941949616648412	0.222533632286996	0.251523275651962	0.218232044198895	0.196218226906386	0.15547263681592	0.180266131056992	0.173615077098801	0.203265306122449	0.203407068395627	0.235116044399596	0.258115913164708	0.222007722007722	0.204885343968096	0.265973911120937	0.246849684968497	0.263495575221239	0.0569948186528497	0.0792845702082221	0.153223084711441	0.139934326850215	0.12524738478937	0.11048411048411	0.128774422735346	0.253002183406114	0.195624195624196	0.272509960159363	0.210353081986834	0.204120357820548	0.0695187165775401	0.177066666666667	0.191467221644121	0.194452387760938	0.138123011664899
[truncated: 98 more columns]
