# Supplementary material for: Understanding Horizontal Gene Transfer network in human gut microbiota
Source: Gut Pathog. 2020 Jul 9;12:33. doi: 10.1186/s13099-020-00370-9 (PMC7346641; doi:10.1186/s13099-020-00370-9)
Supplement: Supplementary file 3 — Additional file 3. Spearman correlation between PageRank of all nodes in HGT networks in IBD dataset. [file 13099_2020_370_MOESM3_ESM.csv]

	C3001_1_CD	C3001_10_CD	C3001_2_CD	C3001_3_CD	C3001_4_CD	C3001_5_CD	C3001_7_CD	C3001_8_CD	C3001_9_CD	C3002_1_CD	C3002_2_CD	C3002_3_CD	C3002_4_CD	C3002_5_CD	C3002_6_CD	C3002_7_CD	C3003_2_UC	C3003_3_UC	C3003_5_UC	C3003_7_UC	C3004_1_UC	C3004_3_UC	C3004_4_UC	C3004_5_UC	C3004_6_UC	C3005_2_UC	C3005_3_UC	C3005_5_UC	C3005_6_UC	C3006_1_UC	C3006_2_UC	C3006_4_UC	C3007_1_CD	C3007_2_CD	C3007_4_CD	C3008_1_CD	C3008_3_CD	C3008_4_CD	E5001_1_CD	E5001_2_CD	E5001_3_CD	E5001_4_CD	E5001_7_CD	E5001_8_CD	E5001_9_CD	E5002_2_non	E5002_3_non	E5002_4_non	E5002_5_non
C3001_1_CD	1	0.512259646342737	0.687855523130657	0.567015846240322	0.609492366611337	0.547148690252432	0.54584581874472	0.552373123036785	0.563290166039499	0.316108623238845	0.387131810367725	0.331928508332729	0.356236951772472	0.440014135269804	0.227524473814146	0.508004105686422	0.345144489819073	0.384841274395472	0.316281438276767	0.278665136127802	0.382022843233446	0.276905291384874	0.260695124939755	0.334950518582709	0.493559596326301	0.333115304151787	0.304544297233531	0.261926244773828	0.278782015791105	0.417515415254301	0.352920374251725	0.391494948773366	0.454137707010349	0.459830298585884	0.317494514892156	0.214244996686118	0.144593014767998	0.257264807151119	0.529854420387867	0.380431339691662	0.397084128972225	0.333870254394978	0.412384983082624	0.290578934724978	0.416867198009731	0.449960932283754	0.511349017357128	0.504237525784776	0.427630126098799
C3001_10_CD	0.512259646342737	1	0.519681427448495	0.716261414084527	0.633842434636179	0.672193911720953	0.626034986478157	0.644923307280861	0.369918886689269	0.486744449305952	0.480652857706229	0.507797230588799	0.436914932823783	0.539456996895358	0.488198485724884	0.533079990175865	0.358146835659425	0.316058297598392	0.273840961268366	0.381411320226735	0.379651225006673	0.247789089220898	0.34007779479738	0.381270365344699	0.364698830454075	0.266681251443608	0.292859746243278	0.271156836116947	0.351075615793768	0.261832741534441	0.299918906787673	0.295661436435362	0.450439782963068	0.20190018420209	0.304929767299953	0.346733576919623	0.292127636561326	0.356012735154377	0.432828450243845	0.345484265229771	0.453657594611385	0.32258031101862	0.412430958690405	0.222497870610372	0.448964156168639	0.238835774847095	0.216541497630613	0.200653989847343	0.137224141259167
C3001_2_CD	0.687855523130657	0.519681427448495	1	0.5020088120057	0.531512478627343	0.475305098466143	0.509198113958205	0.567928433697545	0.558056344702336	0.310709539815129	0.303497651349922	0.33634079875677	0.415068388477789	0.409379154238452	0.355063105780334	0.452922479361667	0.193695083506961	0.204588673349111	0.124400939459542	0.161987101395529	0.275741072377737	0.28294767480135	0.209863170528318	0.228628250776679	0.462081751505326	0.246294440618605	0.200560994158865	0.186104794223229	0.220061884080058	0.287782213458041	0.241483081374565	0.221025382718996	0.246339397770202	0.329821009668304	0.182240903744045	0.217214339244043	0.157899684908804	0.241117802870784	0.410148129741766	0.301750514543273	0.282025810920417	0.281690961439268	0.296620023698895	0.225126645387532	0.411787690622576	0.315041343587553	0.346554284443937	0.336955960921794	0.294728475496339
C3001_3_CD	0.567015846240322	0.716261414084527	0.5020088120057	1	0.646787668236204	0.753505846999058	0.604354528003362	0.660494520746101	0.451938914285249	0.449595691391138	0.421342310009151	0.502504083829734	0.441248166824831	0.556692440081471	0.458871469756794	0.617670556843209	0.328029889158167	0.375004795111124	0.247502861052517	0.363751154874475	0.393667986463219	0.269798348599125	0.294194410454905	0.334654325926361	0.364769144254108	0.20842507551414	0.215872295638625	0.189319545570788	0.215001413297623	0.281957100263234	0.373489447869248	0.347304227772413	0.358005719196863	0.529859824618169	0.364469747656995	0.135211593613682	0.237314049430792	0.236264578785045	0.653235413636012	0.327977566475901	0.401568935820016	0.338409262933577	0.352018321668642	0.185644279686275	0.445634717848238	0.481130716217979	0.441912937983581	0.455905208091224	0.494393877357587
C3001_4_CD	0.609492366611337	0.633842434636179	0.531512478627343	0.646787668236204	1	0.704075756302014	0.535176492810825	0.602090896305395	0.490365186058942	0.408329267505504	0.367664170892791	0.42490074089183	0.39139453042443	0.417948063456352	0.413505714035892	0.39623033245354	0.364004721996035	0.433677551741766	0.35814330568432	0.388972352208182	0.257619780089127	0.206469116397051	0.133934934599665	0.238431201302745	0.332957475514475	0.329297094339068	0.363603471240586	0.269151056933037	0.287961295830775	0.257837606090936	0.294202972549942	0.311971136626898	0.283491148653144	0.198008042990764	0.287384701988982	0.242452604184341	0.184428764900135	0.224768130076726	0.435396077892303	0.434972143891625	0.353398957543149	0.353368304140118	0.439425307121451	0.344233630063937	0.327559038087919	0.337713544486582	0.37228591312419	0.347010695896155	0.273361360303378
C3001_5_CD	0.547148690252432	0.672193911720953	0.475305098466143	0.753505846999058	0.704075756302014	1	0.548059455379763	0.630807052201366	0.394539269340991	0.477938192895237	0.288042174305631	0.429165204306515	0.384455920261142	0.408274670099355	0.320475648639479	0.380000285631489	0.41732943937377	0.39136542347931	0.336620031461697	0.373967403797131	0.40204233445289	0.437451448846217	0.247209806871711	0.306022728948481	0.295622520593971	0.294261554858056	0.326322058816289	0.311746152070629	0.320550481390554	0.244549446209747	0.403516937547462	0.354864886346308	0.202702894624102	0.241572867150325	0.426816509500318	0.180633440057376	0.133210567235287	0.102441787438275	0.535404415971832	0.437381718849009	0.461841238051403	0.409675970254219	0.418491102751848	0.369644881067867	0.540500062611963	0.42346382378439	0.449254783791179	0.427506558622296	0.498722029119721
C3001_7_CD	0.54584581874472	0.626034986478157	0.509198113958205	0.604354528003362	0.535176492810825	0.548059455379763	1	0.627759921672506	0.463673759618777	0.364671793749525	0.383581933995783	0.346671675236676	0.318698348117006	0.457001096080942	0.26280889891072	0.382098225783437	0.228760490339288	0.294216716354588	0.254154245497083	0.250700953904969	0.43499862270973	0.399950211179394	0.391766997051762	0.435953596353329	0.398431651449875	0.338260706537636	0.263051382150151	0.311519445157097	0.346747527576714	0.356759127776211	0.369208734026029	0.384827557731985	0.329330533620269	0.295065218322429	0.223556513097488	0.286136731757481	0.273697052577655	0.24409538615078	0.40125281240418	0.279245495643914	0.379832388254137	0.332835567940032	0.326464913074336	0.302108883108149	0.402943031581866	0.294484345745181	0.268256789824983	0.23449132722099	0.279809718838882
C3001_8_CD	0.552373123036785	0.644923307280861	0.567928433697545	0.660494520746101	0.602090896305395	0.630807052201366	0.627759921672506	1	0.469680655317909	0.41814559151235	0.360606093783388	0.408245704669421	0.465015264018825	0.471098438735048	0.431300274258549	0.437042999949405	0.223511269427004	0.275583125166944	0.223697949587829	0.313999018905507	0.400506328715015	0.287904411431401	0.335622521985551	0.389144507176101	0.399166025948015	0.278974597257038	0.303685503285099	0.285441265968225	0.303823228576728	0.205580653269869	0.279616334543275	0.307985837475168	0.364987156271595	0.246747336344036	0.262160384777628	0.184519811335115	0.263777180555115	0.210290873083834	0.419148805815579	0.34059444224568	0.345060697591493	0.342404992387823	0.3356347248811	0.337901550511191	0.412242931892039	0.330356192889522	0.320589949672497	0.323547881348583	0.336370680591768
C3001_9_CD	0.563290166039499	0.369918886689269	0.558056344702336	0.451938914285249	0.490365186058942	0.394539269340991	0.463673759618777	0.469680655317909	1	0.253762972737122	0.413734169380373	0.27133289206745	0.353115234213966	0.400795096293333	0.2929764617928	0.37579644773967	0.277941324886563	0.378447065452449	0.27242882676621	0.25838512651373	0.351090167931576	0.286426547660887	0.263377376672495	0.314033380489212	0.433630196026134	0.335637189763567	0.250192248329276	0.300493110149899	0.271105826259705	0.289696494814758	0.278703866357372	0.258559730775769	0.516824656788783	0.491489420598348	0.310474713486518	0.250903816803777	0.239174731423403	0.369565688566266	0.300600894911245	0.272947258400858	0.295378581174119	0.251763421836507	0.29001240526022	0.270356877144707	0.208629383498243	0.34956576227778	0.292503656023589	0.262505559141465	0.206723377071397
C3002_1_CD	0.316108623238845	0.486744449305952	0.310709539815129	0.449595691391138	0.408329267505504	0.477938192895237	0.364671793749525	0.41814559151235	0.253762972737122	1	0.663895602290799	0.695284458502942	0.613045372849788	0.702720535872073	0.685898400026565	0.693318546644465	0.340074709525147	0.303860547011836	0.302850949286475	0.30077828940421	0.408294459360861	0.37581524283685	0.364994478874621	0.307876692947795	0.299163818062028	0.145050243172006	0.246034006859368	0.162474632827016	0.275413684694461	0.321920868635364	0.281295283135456	0.273017014908028	0.21446277478873	0.0733924630488803	0.374894394752908	0.327379837743656	0.378453222152919	0.238590489793622	0.319619259842539	0.448674811682013	0.377125856256714	0.379159432601153	0.468159509357566	0.270573044430263	0.482523525713341	0.324771467423919	0.305056516764726	0.179932989739971	0.269540278167435
C3002_2_CD	0.387131810367725	0.480652857706229	0.303497651349922	0.421342310009151	0.367664170892791	0.288042174305631	0.383581933995783	0.360606093783388	0.413734169380373	0.663895602290799	1	0.682003905098868	0.662415368406627	0.706006731555498	0.667656755020415	0.731446471943419	0.356144286224945	0.391122183527573	0.372248349013136	0.350212058036213	0.470981269405744	0.462030249815267	0.464949408386966	0.474219833477641	0.38549754939943	0.205726088321492	0.212870605167617	0.207591119764945	0.293441231119082	0.410482646780349	0.327581264706061	0.372311640550966	0.460782402000701	0.291485279579294	0.376106395191696	0.433420477688227	0.393978135875246	0.329501469133907	0.397859969594232	0.440302109889443	0.451947716409451	0.387057016125015	0.532573797954192	0.234267088874356	0.348497049490654	0.444215028441048	0.374120611205883	0.323096564716794	0.353815250065452
C3002_3_CD	0.331928508332729	0.507797230588799	0.33634079875677	0.502504083829734	0.42490074089183	0.429165204306515	0.346671675236676	0.408245704669421	0.27133289206745	0.695284458502942	0.682003905098868	1	0.669515309934127	0.745603784621043	0.677953297701662	0.700143397163667	0.324586158915949	0.359454264611496	0.226689740192645	0.293418503519846	0.432270628912921	0.419695249028128	0.381577148563887	0.421612778682307	0.391005675629905	0.223899211601414	0.26098644350907	0.217039083981557	0.289583043838466	0.367539526956179	0.296088267006113	0.282836298218442	0.26760482319551	0.186910703174214	0.345731639238375	0.313374212561935	0.217194900943053	0.253272539062461	0.341805931413521	0.452235928567881	0.409648017232788	0.355541752356425	0.484835190853783	0.240646336452488	0.289054790203861	0.3931247958688	0.31028038440614	0.284169687743857	0.373258668143407
C3002_4_CD	0.356236951772472	0.436914932823783	0.415068388477789	0.441248166824831	0.39139453042443	0.384455920261142	0.318698348117006	0.465015264018825	0.353115234213966	0.613045372849788	0.662415368406627	0.669515309934127	1	0.671437764113293	0.674757149013131	0.617864696310168	0.271967241865306	0.30199180995234	0.206476617863711	0.265832889990501	0.335205492713044	0.284056763313848	0.34784855893493	0.31404591559418	0.354736345485022	0.285732098310629	0.269277130373969	0.185293397054417	0.287678083006575	0.305284511221203	0.185608056729598	0.212553898250619	0.332118533572517	0.244273011813121	0.339013409114612	0.338059874570875	0.304964412255939	0.31805758406083	0.258605000554833	0.323004113494422	0.430004153069641	0.275938410809303	0.394515137254675	0.239764428514573	0.309341152818557	0.298348633994855	0.21214033686249	0.19630976051612	0.185862494966166
C3002_5_CD	0.440014135269804	0.539456996895358	0.409379154238452	0.556692440081471	0.417948063456352	0.408274670099355	0.457001096080942	0.471098438735048	0.400795096293333	0.702720535872073	0.706006731555498	0.745603784621043	0.671437764113293	1	0.728497208791971	0.744402978551305	0.327683340463102	0.376212482197976	0.263395098949846	0.350439723852757	0.457427355806135	0.406549578454837	0.369503754743646	0.435690982341279	0.440816029752098	0.235247905061864	0.285020441444039	0.232940245790234	0.343073217748954	0.421600187327965	0.360067921369175	0.346789142903147	0.278035025084217	0.279276252317533	0.372455208550321	0.331037849576819	0.275510891776459	0.236793668285252	0.415077322622551	0.41482837782246	0.494943593866238	0.42971072726186	0.470936715233547	0.242341102244666	0.444997174248447	0.413388836550024	0.371003046409024	0.337970601581504	0.345582270740949
C3002_6_CD	0.227524473814146	0.488198485724884	0.355063105780334	0.458871469756794	0.413505714035892	0.320475648639479	0.26280889891072	0.431300274258549	0.2929764617928	0.685898400026565	0.667656755020415	0.677953297701662	0.674757149013131	0.728497208791971	1	0.741388122318006	0.308212693622244	0.288069415390783	0.252967585744001	0.341856263816697	0.34063924872408	0.266559755007685	0.316772808896189	0.316591618813688	0.359141146097993	0.239059244453254	0.277772475719262	0.191545041402058	0.211622875311103	0.303019142840982	0.283946623726712	0.20747512691049	0.104329071677324	0.113516111284891	0.236872730675788	0.257995375798977	0.346192305429239	0.296078489756203	0.325940869317652	0.42538407856076	0.447335279825002	0.302558250608236	0.388877237931648	0.225399780150182	0.252147626414787	0.197056040120556	0.223530698522626	0.111486789897826	0.0745331520813699
C3002_7_CD	0.508004105686422	0.533079990175865	0.452922479361667	0.617670556843209	0.39623033245354	0.380000285631489	0.382098225783437	0.437042999949405	0.37579644773967	0.693318546644465	0.731446471943419	0.700143397163667	0.617864696310168	0.744402978551305	0.741388122318006	1	0.352940594752224	0.405903949368866	0.283441460750839	0.368538008889191	0.453147346556576	0.358461616720431	0.424907450297969	0.443348156128839	0.394642196579027	0.226564745169643	0.216394892114008	0.140374098737982	0.322305373028179	0.428850685588276	0.368755801375532	0.402526736089738	0.291981379304501	0.473744738848173	0.365972565624612	0.383560017100704	0.3874127213299	0.365297022890639	0.599613973124391	0.433981004985316	0.451833443983623	0.450507722337069	0.498515203987777	0.185322666447564	0.378078387528292	0.523697623242833	0.567376197439811	0.555271573031876	0.450260044982044
C3003_2_UC	0.345144489819073	0.358146835659425	0.193695083506961	0.328029889158167	0.364004721996035	0.41732943937377	0.228760490339288	0.223511269427004	0.277941324886563	0.340074709525147	0.356144286224945	0.324586158915949	0.271967241865306	0.327683340463102	0.308212693622244	0.352940594752224	1	0.64362475528396	0.682347948415716	0.697487416414893	0.420322299210083	0.36196895905263	0.346184495266145	0.413580418631462	0.288789659916241	0.411673967489454	0.385957399431825	0.399998412252452	0.384192127154619	0.389151471201722	0.431385503721731	0.400955625820352	0.376182290636365	0.30954812127647	0.448346932834425	0.352470536555002	0.256141019420677	0.373995141349073	0.482094990808376	0.484632808146453	0.462687161336587	0.399191648909654	0.474926429312068	0.299479797334341	0.319017055228504	0.405746491515954	0.432242890764152	0.494080244243349	0.439560079966125
C3003_3_UC	0.384841274395472	0.316058297598392	0.204588673349111	0.375004795111124	0.433677551741766	0.39136542347931	0.294216716354588	0.275583125166944	0.378447065452449	0.303860547011836	0.391122183527573	0.359454264611496	0.30199180995234	0.376212482197976	0.288069415390783	0.405903949368866	0.64362475528396	1	0.668524079826563	0.673512431633366	0.382105643336468	0.24462878423289	0.376072136064074	0.430944989363796	0.339539378159264	0.457449089993596	0.422293707619228	0.393154769065173	0.479410830090683	0.436733838252287	0.455465520789109	0.467246089074132	0.185769985012581	0.312389800839519	0.47035670067368	0.330034382488875	0.324487458510046	0.37008317664872	0.478884009697396	0.500107203084854	0.523466688958181	0.508369750215903	0.494569147979937	0.334059037643962	0.272919173777563	0.474350736949452	0.410980155652173	0.493913397032341	0.343161918945968
C3003_5_UC	0.316281438276767	0.273840961268366	0.124400939459542	0.247502861052517	0.35814330568432	0.336620031461697	0.254154245497083	0.223697949587829	0.27242882676621	0.302850949286475	0.372248349013136	0.226689740192645	0.206476617863711	0.263395098949846	0.252967585744001	0.283441460750839	0.682347948415716	0.668524079826563	1	0.650291145907991	0.418933835236807	0.238057447330758	0.363925568479579	0.42224448553264	0.369515871291502	0.43341329228024	0.362998305147134	0.383661264836531	0.434448359311955	0.420359976552064	0.465241002442935	0.441038983815246	0.274978147473902	0.329273102472299	0.470011157846593	0.316624083465881	0.264533013287764	0.413369872115597	0.468586859368435	0.460519593789389	0.505853610066457	0.411353526698606	0.51044109304115	0.320148382246514	0.40835596609781	0.436246054567782	0.427023833116569	0.473602277982874	0.424058929316493
C3003_7_UC	0.278665136127802	0.381411320226735	0.161987101395529	0.363751154874475	0.388972352208182	0.373967403797131	0.250700953904969	0.313999018905507	0.25838512651373	0.30077828940421	0.350212058036213	0.293418503519846	0.265832889990501	0.350439723852757	0.341856263816697	0.368538008889191	0.697487416414893	0.673512431633366	0.650291145907991	1	0.381480138067046	0.305948086489497	0.355298373729088	0.433153614427181	0.367266429063581	0.449554921190278	0.47190875107511	0.436669295701288	0.454975554478815	0.466054533884247	0.52598952616378	0.455857778338464	0.330971136908765	0.34319386421121	0.496171835954043	0.272967762269269	0.258333551691933	0.397267402317406	0.540370055897315	0.512254187831108	0.524466704990295	0.490590122432627	0.521222400116752	0.339211675124483	0.447457152937394	0.477325576141465	0.430968061505346	0.460180722107511	0.463908769480137
C3004_1_UC	0.382022843233446	0.379651225006673	0.275741072377737	0.393667986463219	0.257619780089127	0.40204233445289	0.43499862270973	0.400506328715015	0.351090167931576	0.408294459360861	0.470981269405744	0.432270628912921	0.335205492713044	0.457427355806135	0.34063924872408	0.453147346556576	0.420322299210083	0.382105643336468	0.418933835236807	0.381480138067046	1	0.637335547017566	0.74464009614512	0.695413452590253	0.62260807773825	0.414544466546937	0.382357673261882	0.401340045991777	0.424160527155396	0.521959571334876	0.539085938765737	0.448382056076606	0.293749409245597	0.382210436974868	0.441967234605788	0.299883881805156	0.300352458891698	0.2786608456901	0.441390335915072	0.383942938049543	0.430507877748236	0.397423177766836	0.340675012084352	0.222446345947703	0.301567569957289	0.455476770536254	0.447976897300121	0.355083326013257	0.368653942003734
C3004_3_UC	0.276905291384874	0.247789089220898	0.28294767480135	0.269798348599125	0.206469116397051	0.437451448846217	0.399950211179394	0.287904411431401	0.286426547660887	0.37581524283685	0.462030249815267	0.419695249028128	0.284056763313848	0.406549578454837	0.266559755007685	0.358461616720431	0.36196895905263	0.24462878423289	0.238057447330758	0.305948086489497	0.637335547017566	1	0.573827146907907	0.610335898995927	0.481859604446973	0.361592460936135	0.261560579897835	0.383812279321501	0.399302461151267	0.368177225880891	0.418943359599654	0.376328261956205	0.222435327592825	0.299810133676253	0.387355953160923	0.349326529027176	0.219993293029897	0.259594562674654	0.435268427205046	0.306174266795944	0.34562492573105	0.297089671770574	0.262960984120913	0.230415599024418	0.373099973915061	0.392588001450673	0.381497827730745	0.411828133445996	0.423581092778182
C3004_4_UC	0.260695124939755	0.34007779479738	0.209863170528318	0.294194410454905	0.133934934599665	0.247209806871711	0.391766997051762	0.335622521985551	0.263377376672495	0.364994478874621	0.464949408386966	0.381577148563887	0.34784855893493	0.369503754743646	0.316772808896189	0.424907450297969	0.346184495266145	0.376072136064074	0.363925568479579	0.355298373729088	0.74464009614512	0.573827146907907	1	0.677000763255806	0.643955233504702	0.400147098844766	0.343816851739226	0.379582763055291	0.427465727471777	0.490945408947954	0.438584473349474	0.403352315495637	0.314098010913303	0.244481208495577	0.383967164436523	0.343718730462966	0.298557364073465	0.280429248480054	0.315827053935705	0.272727702548257	0.3687607912392	0.326704563267526	0.339408976054102	0.176347251962696	0.222541794640193	0.370544024400094	0.327452379910226	0.282400771558683	0.333458363893376
C3004_5_UC	0.334950518582709	0.381270365344699	0.228628250776679	0.334654325926361	0.238431201302745	0.306022728948481	0.435953596353329	0.389144507176101	0.314033380489212	0.307876692947795	0.474219833477641	0.421612778682307	0.31404591559418	0.435690982341279	0.316591618813688	0.443348156128839	0.413580418631462	0.430944989363796	0.42224448553264	0.433153614427181	0.695413452590253	0.610335898995927	0.677000763255806	1	0.561586040291253	0.390447125301519	0.293287632485866	0.342021268494208	0.415394442256046	0.441713125756656	0.413141299734977	0.38265277287351	0.257908093937925	0.331594067281013	0.460227472508658	0.307444181675162	0.243082830249103	0.362209935879456	0.366893189657042	0.314746068266972	0.371344307489304	0.321539551363981	0.34255854648921	0.217613616130163	0.315357409212121	0.339562304209885	0.351834515090755	0.366467540461418	0.326880203833478
C3004_6_UC	0.493559596326301	0.364698830454075	0.462081751505326	0.364769144254108	0.332957475514475	0.295622520593971	0.398431651449875	0.399166025948015	0.433630196026134	0.299163818062028	0.38549754939943	0.391005675629905	0.354736345485022	0.440816029752098	0.359141146097993	0.394642196579027	0.288789659916241	0.339539378159264	0.369515871291502	0.367266429063581	0.62260807773825	0.481859604446973	0.643955233504702	0.561586040291253	1	0.410519686412323	0.279414137812487	0.363147261236608	0.375026934640127	0.412093877103957	0.358214848096946	0.329432693285895	0.353265550410989	0.233391396619848	0.328469464084584	0.295469536953948	0.227767878473053	0.211818189649609	0.310578903801611	0.304693766370242	0.324327766313075	0.25887376767013	0.328962489887951	0.238572294419628	0.337612692137209	0.301202025286459	0.334549395849444	0.292890314369192	0.332888709892914
C3005_2_UC	0.333115304151787	0.266681251443608	0.246294440618605	0.20842507551414	0.329297094339068	0.294261554858056	0.338260706537636	0.278974597257038	0.335637189763567	0.145050243172006	0.205726088321492	0.223899211601414	0.285732098310629	0.235247905061864	0.239059244453254	0.226564745169643	0.411673967489454	0.457449089993596	0.43341329228024	0.449554921190278	0.414544466546937	0.361592460936135	0.400147098844766	0.390447125301519	0.410519686412323	1	0.581574258211999	0.622980365893807	0.611439821839647	0.42078293539103	0.38623798647874	0.374722625412072	0.235021357364647	0.250375554392466	0.419034680545823	0.404209396798892	0.393886107244384	0.361899538306487	0.437103335473414	0.380050064203217	0.428786300626851	0.35435993646528	0.427721782799832	0.214616605763893	0.463513923809792	0.317499387655206	0.317128423373366	0.359423216109994	0.306320697742838
C3005_3_UC	0.304544297233531	0.292859746243278	0.200560994158865	0.215872295638625	0.363603471240586	0.326322058816289	0.263051382150151	0.303685503285099	0.250192248329276	0.246034006859368	0.212870605167617	0.26098644350907	0.269277130373969	0.285020441444039	0.277772475719262	0.216394892114008	0.385957399431825	0.422293707619228	0.362998305147134	0.47190875107511	0.382357673261882	0.261560579897835	0.343816851739226	0.293287632485866	0.279414137812487	0.581574258211999	1	0.680624885691879	0.598124018927245	0.425758338049897	0.396890930667949	0.411697440779547	0.419855926744836	0.318665117391775	0.410001700959784	0.346085482166974	0.337856227289127	0.363210416059895	0.379063139501003	0.446335205697298	0.498309002520716	0.465649391070877	0.430628569594051	0.367928104517547	0.3694198823808	0.256719613032119	0.29525250170036	0.38265143096587	0.168413815120124
C3005_5_UC	0.261926244773828	0.271156836116947	0.186104794223229	0.189319545570788	0.269151056933037	0.311746152070629	0.311519445157097	0.285441265968225	0.300493110149899	0.162474632827016	0.207591119764945	0.217039083981557	0.185293397054417	0.232940245790234	0.191545041402058	0.140374098737982	0.399998412252452	0.393154769065173	0.383661264836531	0.436669295701288	0.401340045991777	0.383812279321501	0.379582763055291	0.342021268494208	0.363147261236608	0.622980365893807	0.680624885691879	1	0.676447418308924	0.403828570364088	0.364831508309181	0.340917619898023	0.363373309429609	0.33326971949341	0.414390148934698	0.333317459073804	0.354588638769748	0.368646780031774	0.408976806368307	0.415946623311032	0.456318277922623	0.397054053348263	0.396848641644433	0.304826511108017	0.385838288965023	0.273332453139205	0.31099568935375	0.35538560533957	0.277858281408157
C3005_6_UC	0.278782015791105	0.351075615793768	0.220061884080058	0.215001413297623	0.287961295830775	0.320550481390554	0.346747527576714	0.303823228576728	0.271105826259705	0.275413684694461	0.293441231119082	0.289583043838466	0.287678083006575	0.343073217748954	0.211622875311103	0.322305373028179	0.384192127154619	0.479410830090683	0.434448359311955	0.454975554478815	0.424160527155396	0.399302461151267	0.427465727471777	0.415394442256046	0.375026934640127	0.611439821839647	0.598124018927245	0.676447418308924	1	0.382173219249733	0.372920568678903	0.368912965565956	0.380472789766608	0.391834036960378	0.379658900625021	0.44902009646022	0.454121195373035	0.362451366712373	0.408486793673824	0.341273847652805	0.433651032768909	0.403956302346847	0.368482040256201	0.298442100615968	0.466205205865076	0.304925817574561	0.257751474692626	0.272660526532332	0.293592233289958
C3006_1_UC	0.417515415254301	0.261832741534441	0.287782213458041	0.281957100263234	0.257837606090936	0.244549446209747	0.356759127776211	0.205580653269869	0.289696494814758	0.321920868635364	0.410482646780349	0.367539526956179	0.305284511221203	0.421600187327965	0.303019142840982	0.428850685588276	0.389151471201722	0.436733838252287	0.420359976552064	0.466054533884247	0.521959571334876	0.368177225880891	0.490945408947954	0.441713125756656	0.412093877103957	0.42078293539103	0.425758338049897	0.403828570364088	0.382173219249733	1	0.623687325875101	0.626858731282405	0.27985451876802	0.313258253876546	0.409907272063633	0.251680498660784	0.325562725230834	0.352401092416403	0.430575039491388	0.420157164955678	0.444871209757796	0.384867893267563	0.516113594622215	0.223579175821524	0.438645007471633	0.384284518781654	0.379535331520123	0.441426376737473	0.299724057714617
C3006_2_UC	0.352920374251725	0.299918906787673	0.241483081374565	0.373489447869248	0.294202972549942	0.403516937547462	0.369208734026029	0.279616334543275	0.278703866357372	0.281295283135456	0.327581264706061	0.296088267006113	0.185608056729598	0.360067921369175	0.283946623726712	0.368755801375532	0.431385503721731	0.455465520789109	0.465241002442935	0.52598952616378	0.539085938765737	0.418943359599654	0.438584473349474	0.413141299734977	0.358214848096946	0.38623798647874	0.396890930667949	0.364831508309181	0.372920568678903	0.623687325875101	1	0.709141513986882	0.273712389927995	0.252459777674775	0.445526057731353	0.217235221915896	0.356822502657319	0.361839003867185	0.506400284864241	0.502255667255003	0.495078247334498	0.506961498182547	0.524113203953465	0.292268998260249	0.564239591575717	0.408277203990212	0.396865199691948	0.482792350634242	0.374439518576175
C3006_4_UC	0.391494948773366	0.295661436435362	0.221025382718996	0.347304227772413	0.311971136626898	0.354864886346308	0.384827557731985	0.307985837475168	0.258559730775769	0.273017014908028	0.372311640550966	0.282836298218442	0.212553898250619	0.346789142903147	0.20747512691049	0.402526736089738	0.400955625820352	0.467246089074132	0.441038983815246	0.455857778338464	0.448382056076606	0.376328261956205	0.403352315495637	0.38265277287351	0.329432693285895	0.374722625412072	0.411697440779547	0.340917619898023	0.368912965565956	0.626858731282405	0.709141513986882	1	0.308602422154587	0.254582041371916	0.407219946027528	0.328950352383386	0.391368380825101	0.434204894062188	0.484817198963698	0.518084280446959	0.492000586130971	0.499548014347636	0.560998082376497	0.340915119507269	0.492271070848335	0.431630184849493	0.445197414517671	0.488942891467302	0.350686218630931
C3007_1_CD	0.454137707010349	0.450439782963068	0.246339397770202	0.358005719196863	0.283491148653144	0.202702894624102	0.329330533620269	0.364987156271595	0.516824656788783	0.21446277478873	0.460782402000701	0.26760482319551	0.332118533572517	0.278035025084217	0.104329071677324	0.291981379304501	0.376182290636365	0.185769985012581	0.274978147473902	0.330971136908765	0.293749409245597	0.222435327592825	0.314098010913303	0.257908093937925	0.353265550410989	0.235021357364647	0.419855926744836	0.363373309429609	0.380472789766608	0.27985451876802	0.273712389927995	0.308602422154587	1	0.681928517680414	0.302483768497594	0.41215989956035	0.375197393696862	0.412256438704305	0.407440957098044	0.2459582794399	0.298215732848819	0.333057815332103	0.35933910318775	0.238015285181945	0.277281824558884	0.342459713702202	0.238587482873789	0.246709796072545	0.405964793500399
C3007_2_CD	0.459830298585884	0.20190018420209	0.329821009668304	0.529859824618169	0.198008042990764	0.241572867150325	0.295065218322429	0.246747336344036	0.491489420598348	0.0733924630488803	0.291485279579294	0.186910703174214	0.244273011813121	0.279276252317533	0.113516111284891	0.473744738848173	0.30954812127647	0.312389800839519	0.329273102472299	0.34319386421121	0.382210436974868	0.299810133676253	0.244481208495577	0.331594067281013	0.233391396619848	0.250375554392466	0.318665117391775	0.33326971949341	0.391834036960378	0.313258253876546	0.252459777674775	0.254582041371916	0.681928517680414	1	0.481212312394186	0.283746868481823	0.363392277538122	0.382918577103385	0.683547101585965	0.244808320802823	0.3686562756793	0.321612797055741	0.278173149503433	0.0784587240324059	0.277682387347202	0.468421068547015	0.488698310295666	0.557996804264633	0.679765424047622
C3007_4_CD	0.317494514892156	0.304929767299953	0.182240903744045	0.364469747656995	0.287384701988982	0.426816509500318	0.223556513097488	0.262160384777628	0.310474713486518	0.374894394752908	0.376106395191696	0.345731639238375	0.339013409114612	0.372455208550321	0.236872730675788	0.365972565624612	0.448346932834425	0.47035670067368	0.470011157846593	0.496171835954043	0.441967234605788	0.387355953160923	0.383967164436523	0.460227472508658	0.328469464084584	0.419034680545823	0.410001700959784	0.414390148934698	0.379658900625021	0.409907272063633	0.445526057731353	0.407219946027528	0.302483768497594	0.481212312394186	1	0.248289613909401	0.26059818888127	0.260439337013014	0.46339769452885	0.411383651744774	0.446713063670687	0.39844545622249	0.465564598962006	0.359965839592498	0.458792129540755	0.414428759801505	0.413071489272744	0.430415121467008	0.437549467910002
C3008_1_CD	0.214244996686118	0.346733576919623	0.217214339244043	0.135211593613682	0.242452604184341	0.180633440057376	0.286136731757481	0.184519811335115	0.250903816803777	0.327379837743656	0.433420477688227	0.313374212561935	0.338059874570875	0.331037849576819	0.257995375798977	0.383560017100704	0.352470536555002	0.330034382488875	0.316624083465881	0.272967762269269	0.299883881805156	0.349326529027176	0.343718730462966	0.307444181675162	0.295469536953948	0.404209396798892	0.346085482166974	0.333317459073804	0.44902009646022	0.251680498660784	0.217235221915896	0.328950352383386	0.41215989956035	0.283746868481823	0.248289613909401	1	0.641757331773903	0.644091179514423	0.232947705181485	0.297753248419772	0.372417412081521	0.302971296148695	0.405543170388231	0.191817207362978	0.235767338483752	0.306340780754531	0.336291061652143	0.200512239973844	0.157551486540423
C3008_3_CD	0.144593014767998	0.292127636561326	0.157899684908804	0.237314049430792	0.184428764900135	0.133210567235287	0.273697052577655	0.263777180555115	0.239174731423403	0.378453222152919	0.393978135875246	0.217194900943053	0.304964412255939	0.275510891776459	0.346192305429239	0.3874127213299	0.256141019420677	0.324487458510046	0.264533013287764	0.258333551691933	0.300352458891698	0.219993293029897	0.298557364073465	0.243082830249103	0.227767878473053	0.393886107244384	0.337856227289127	0.354588638769748	0.454121195373035	0.325562725230834	0.356822502657319	0.391368380825101	0.375197393696862	0.363392277538122	0.26059818888127	0.641757331773903	1	0.698025052152252	0.205552894829561	0.300665078395992	0.335544859350741	0.296171741808941	0.338828226726467	0.242923970103041	0.233786867722884	0.253869298677185	0.202901314048791	0.111214906707345	0.218794207709946
C3008_4_CD	0.257264807151119	0.356012735154377	0.241117802870784	0.236264578785045	0.224768130076726	0.102441787438275	0.24409538615078	0.210290873083834	0.369565688566266	0.238590489793622	0.329501469133907	0.253272539062461	0.31805758406083	0.236793668285252	0.296078489756203	0.365297022890639	0.373995141349073	0.37008317664872	0.413369872115597	0.397267402317406	0.2786608456901	0.259594562674654	0.280429248480054	0.362209935879456	0.211818189649609	0.361899538306487	0.363210416059895	0.368646780031774	0.362451366712373	0.352401092416403	0.361839003867185	0.434204894062188	0.412256438704305	0.382918577103385	0.260439337013014	0.644091179514423	0.698025052152252	1	0.334746864935936	0.426931216766136	0.436385949354804	0.327053015688094	0.421410018168352	0.305573750014479	0.200863226433485	0.313071964431312	0.198533185892099	0.180353997341734	0.20884595124856
E5001_1_CD	0.529854420387867	0.432828450243845	0.410148129741766	0.653235413636012	0.435396077892303	0.535404415971832	0.40125281240418	0.419148805815579	0.300600894911245	0.319619259842539	0.397859969594232	0.341805931413521	0.258605000554833	0.415077322622551	0.325940869317652	0.599613973124391	0.482094990808376	0.478884009697396	0.468586859368435	0.540370055897315	0.441390335915072	0.435268427205046	0.315827053935705	0.366893189657042	0.310578903801611	0.437103335473414	0.379063139501003	0.408976806368307	0.408486793673824	0.430575039491388	0.506400284864241	0.484817198963698	0.407440957098044	0.683547101585965	0.46339769452885	0.232947705181485	0.205552894829561	0.334746864935936	1	0.586077663413837	0.624820655764852	0.608655233846241	0.576310638627189	0.395726078241327	0.588654593318172	0.5408636090074	0.606554066111213	0.586291569638198	0.657614930246039
E5001_2_CD	0.380431339691662	0.345484265229771	0.301750514543273	0.327977566475901	0.434972143891625	0.437381718849009	0.279245495643914	0.34059444224568	0.272947258400858	0.448674811682013	0.440302109889443	0.452235928567881	0.323004113494422	0.41482837782246	0.42538407856076	0.433981004985316	0.484632808146453	0.500107203084854	0.460519593789389	0.512254187831108	0.383942938049543	0.306174266795944	0.272727702548257	0.314746068266972	0.304693766370242	0.380050064203217	0.446335205697298	0.415946623311032	0.341273847652805	0.420157164955678	0.502255667255003	0.518084280446959	0.2459582794399	0.244808320802823	0.411383651744774	0.297753248419772	0.300665078395992	0.426931216766136	0.586077663413837	1	0.665868160714587	0.650900690931536	0.660119050091689	0.385717524887901	0.466010750216768	0.428805121478345	0.428378438142579	0.51672073059047	0.408586649839327
E5001_3_CD	0.397084128972225	0.453657594611385	0.282025810920417	0.401568935820016	0.353398957543149	0.461841238051403	0.379832388254137	0.345060697591493	0.295378581174119	0.377125856256714	0.451947716409451	0.409648017232788	0.430004153069641	0.494943593866238	0.447335279825002	0.451833443983623	0.462687161336587	0.523466688958181	0.505853610066457	0.524466704990295	0.430507877748236	0.34562492573105	0.3687607912392	0.371344307489304	0.324327766313075	0.428786300626851	0.498309002520716	0.456318277922623	0.433651032768909	0.444871209757796	0.495078247334498	0.492000586130971	0.298215732848819	0.3686562756793	0.446713063670687	0.372417412081521	0.335544859350741	0.436385949354804	0.624820655764852	0.665868160714587	1	0.607096928428883	0.674264628067858	0.486355297797582	0.524754037614661	0.438253814510277	0.468647948278872	0.466178683367577	0.399657194904579
E5001_4_CD	0.333870254394978	0.32258031101862	0.281690961439268	0.338409262933577	0.353368304140118	0.409675970254219	0.332835567940032	0.342404992387823	0.251763421836507	0.379159432601153	0.387057016125015	0.355541752356425	0.275938410809303	0.42971072726186	0.302558250608236	0.450507722337069	0.399191648909654	0.508369750215903	0.411353526698606	0.490590122432627	0.397423177766836	0.297089671770574	0.326704563267526	0.321539551363981	0.25887376767013	0.35435993646528	0.465649391070877	0.397054053348263	0.403956302346847	0.384867893267563	0.506961498182547	0.499548014347636	0.333057815332103	0.321612797055741	0.39844545622249	0.302971296148695	0.296171741808941	0.327053015688094	0.608655233846241	0.650900690931536	0.607096928428883	1	0.616305840491128	0.425697280208331	0.448790938396336	0.416041865310029	0.439813803002797	0.503572583923217	0.397898440516136
E5001_7_CD	0.412384983082624	0.412430958690405	0.296620023698895	0.352018321668642	0.439425307121451	0.418491102751848	0.326464913074336	0.3356347248811	0.29001240526022	0.468159509357566	0.532573797954192	0.484835190853783	0.394515137254675	0.470936715233547	0.388877237931648	0.498515203987777	0.474926429312068	0.494569147979937	0.51044109304115	0.521222400116752	0.340675012084352	0.262960984120913	0.339408976054102	0.34255854648921	0.328962489887951	0.427721782799832	0.430628569594051	0.396848641644433	0.368482040256201	0.516113594622215	0.524113203953465	0.560998082376497	0.35933910318775	0.278173149503433	0.465564598962006	0.405543170388231	0.338828226726467	0.421410018168352	0.576310638627189	0.660119050091689	0.674264628067858	0.616305840491128	1	0.408393357119179	0.519716817539529	0.400286802129047	0.469016895160564	0.517463386669187	0.455818083026528
E5001_8_CD	0.290578934724978	0.222497870610372	0.225126645387532	0.185644279686275	0.344233630063937	0.369644881067867	0.302108883108149	0.337901550511191	0.270356877144707	0.270573044430263	0.234267088874356	0.240646336452488	0.239764428514573	0.242341102244666	0.225399780150182	0.185322666447564	0.299479797334341	0.334059037643962	0.320148382246514	0.339211675124483	0.222446345947703	0.230415599024418	0.176347251962696	0.217613616130163	0.238572294419628	0.214616605763893	0.367928104517547	0.304826511108017	0.298442100615968	0.223579175821524	0.292268998260249	0.340915119507269	0.238015285181945	0.0784587240324059	0.359965839592498	0.191817207362978	0.242923970103041	0.305573750014479	0.395726078241327	0.385717524887901	0.486355297797582	0.425697280208331	0.408393357119179	1	0.46933856091448	0.302170440057394	0.335253160325926	0.336011508788043	0.297826896043014
E5001_9_CD	0.416867198009731	0.448964156168639	0.411787690622576	0.445634717848238	0.327559038087919	0.540500062611963	0.402943031581866	0.412242931892039	0.208629383498243	0.482523525713341	0.348497049490654	0.289054790203861	0.309341152818557	0.444997174248447	0.252147626414787	0.378078387528292	0.319017055228504	0.272919173777563	0.40835596609781	0.447457152937394	0.301567569957289	0.373099973915061	0.222541794640193	0.315357409212121	0.337612692137209	0.463513923809792	0.3694198823808	0.385838288965023	0.466205205865076	0.438645007471633	0.564239591575717	0.492271070848335	0.277281824558884	0.277682387347202	0.458792129540755	0.235767338483752	0.233786867722884	0.200863226433485	0.588654593318172	0.466010750216768	0.524754037614661	0.448790938396336	0.519716817539529	0.46933856091448	1	0.482815340409513	0.517423204722866	0.493221847354063	0.547595180757744
E5002_2_non	0.449960932283754	0.238835774847095	0.315041343587553	0.481130716217979	0.337713544486582	0.42346382378439	0.294484345745181	0.330356192889522	0.34956576227778	0.324771467423919	0.444215028441048	0.3931247958688	0.298348633994855	0.413388836550024	0.197056040120556	0.523697623242833	0.405746491515954	0.474350736949452	0.436246054567782	0.477325576141465	0.455476770536254	0.392588001450673	0.370544024400094	0.339562304209885	0.301202025286459	0.317499387655206	0.256719613032119	0.273332453139205	0.304925817574561	0.384284518781654	0.408277203990212	0.431630184849493	0.342459713702202	0.468421068547015	0.414428759801505	0.306340780754531	0.253869298677185	0.313071964431312	0.5408636090074	0.428805121478345	0.438253814510277	0.416041865310029	0.400286802129047	0.302170440057394	0.482815340409513	1	0.657693999040495	0.655271327502578	0.448762633276657
E5002_3_non	0.511349017357128	0.216541497630613	0.346554284443937	0.441912937983581	0.37228591312419	0.449254783791179	0.268256789824983	0.320589949672497	0.292503656023589	0.305056516764726	0.374120611205883	0.31028038440614	0.21214033686249	0.371003046409024	0.223530698522626	0.567376197439811	0.432242890764152	0.410980155652173	0.427023833116569	0.430968061505346	0.447976897300121	0.381497827730745	0.327452379910226	0.351834515090755	0.334549395849444	0.317128423373366	0.29525250170036	0.31099568935375	0.257751474692626	0.379535331520123	0.396865199691948	0.445197414517671	0.238587482873789	0.488698310295666	0.413071489272744	0.336291061652143	0.202901314048791	0.198533185892099	0.606554066111213	0.428378438142579	0.468647948278872	0.439813803002797	0.469016895160564	0.335253160325926	0.517423204722866	0.657693999040495	1	0.743477130461613	0.556828448581631
E5002_4_non	0.504237525784776	0.200653989847343	0.336955960921794	0.455905208091224	0.347010695896155	0.427506558622296	0.23449132722099	0.323547881348583	0.262505559141465	0.179932989739971	0.323096564716794	0.284169687743857	0.19630976051612	0.337970601581504	0.111486789897826	0.555271573031876	0.494080244243349	0.493913397032341	0.473602277982874	0.460180722107511	0.355083326013257	0.411828133445996	0.282400771558683	0.366467540461418	0.292890314369192	0.359423216109994	0.38265143096587	0.35538560533957	0.272660526532332	0.441426376737473	0.482792350634242	0.488942891467302	0.246709796072545	0.557996804264633	0.430415121467008	0.200512239973844	0.111214906707345	0.180353997341734	0.586291569638198	0.51672073059047	0.466178683367577	0.503572583923217	0.517463386669187	0.336011508788043	0.493221847354063	0.655271327502578	0.743477130461613	1	0.58313309212735
E5002_5_non	0.427630126098799	0.137224141259167	0.294728475496339	0.494393877357587	0.273361360303378	0.498722029119721	0.279809718838882	0.336370680591768	0.206723377071397	0.269540278167435	0.353815250065452	0.373258668143407	0.185862494966166	0.345582270740949	0.0745331520813699	0.450260044982044	0.439560079966125	0.343161918945968	0.424058929316493	0.463908769480137	0.368653942003734	0.423581092778182	0.333458363893376	0.326880203833478	0.332888709892914	0.306320697742838	0.168413815120124	0.277858281408157	0.293592233289958	0.299724057714617	0.374439518576175	0.350686218630931	0.405964793500399	0.679765424047622	0.437549467910002	0.157551486540423	0.218794207709946	0.20884595124856	0.657614930246039	0.408586649839327	0.399657194904579	0.397898440516136	0.455818083026528	0.297826896043014	0.547595180757744	0.448762633276657	0.556828448581631	0.58313309212735	1
E5002_6_non	0.43945888686689	0.272960533914953	0.294479653017882	0.309248705464367	0.347458688348956	0.366187010030473	0.300326086928143	0.281797299947445	0.269395915584422	0.248914994391918	0.35221617550896	0.333942919387917	0.361065212830178	0.397226420528745	0.233033164760729	0.428184702564402	0.405123418676286	0.432200252091964	0.427327706355819	0.434794087188216	0.383501294558519	0.227297713114899	0.366860941128984	0.310964392730595	0.421611826891749	0.336051198573704	0.381783560798062	0.271776023479678	0.254870264985261	0.459078965956479	0.437353729151117	0.412090352865768	0.334461052774856	0.261184566520359	0.429402963722186	0.304941367892023	0.202084342091243	0.25497793476969	0.327096736774632	0.451562743396898	0.449486203167534	0.447011924244676	0.490591034542036	0.373503448869836	0.476024847331575	0.539555387197125	0.579416084656965	0.588821082568278	0.37275927454197
E5004_2_UC	0.484337280422083	0.301369099908279	0.288987117523362	0.351799575676186	0.520485754491911	0.491206284998503	0.265881778920037	0.340415042674102	0.377182076040651	0.341423954864214	0.29608925835151	0.384192735024827	0.342559810392571	0.343825063850063	0.251152804144161	0.423264233416855	0.540096454948482	0.564425249744733	0.496911339701345	0.549671493301433	0.388694132860355	0.321741672923469	0.364485073064573	0.35091296984839	0.382821758205352	0.412102699241526	0.45014066073703	0.378692190193157	0.395461409090208	0.428866406753272	0.468511939041926	0.46104305976034	0.301593068742514	0.254916458000619	0.539944657625947	0.259034706600817	0.276690640622458	0.334372629086981	0.536084378449884	0.526104994118953	0.447019686696485	0.486634447473307	0.490383448616713	0.397433944748949	0.417232483537036	0.441433049449026	0.47325443275946	0.558435601783115	0.440726934823152
E5004_3_UC	0.411440234330409	0.396212917693162	0.283381160315453	0.33250974906468	0.356267619515485	0.469390414275773	0.365239404351548	0.368413167777299	0.289859934653875	0.310406577522992	0.325891568982906	0.382690358886972	0.331358918797001	0.375231823006538	0.260455973951114	0.367538347194652	0.516895464815012	0.489469749462019	0.478402461126156	0.541845300887655	0.494678094742393	0.387362616383823	0.417174142147677	0.458488476910064	0.398963012439712	0.437465553314056	0.439461545434392	0.448401064496698	0.41118843111616	0.442712285372442	0.459253811789426	0.435429649249762	0.343594352191647	0.315574285737649	0.567407699151287	0.275453582037078	0.323040332607599	0.357105154688899	0.520154027816401	0.511848899202	0.494635555427985	0.523263547299334	0.51075994034682	0.31962275219828	0.444442896851607	0.444126220043501	0.433812525897802	0.51133915186953	0.460922200757407
E5004_4_UC	0.406918958978975	0.288341304374356	0.309030328619559	0.296598260186709	0.431773024664119	0.378944009746417	0.267844245962073	0.38331668234688	0.376197696718801	0.314674277128216	0.273319997899672	0.327047607852177	0.299880054071081	0.319467720674216	0.292253824710612	0.286886867826402	0.404010143300708	0.488510434774849	0.438733396070054	0.481696756587957	0.406537842009598	0.345845956024891	0.367658911116201	0.347870564505939	0.411316590164905	0.378167116906365	0.456266501080905	0.433896468512236	0.322554815560622	0.377576787820368	0.42296421504739	0.412531515032287	0.257200353012026	0.271620168601981	0.57846101914658	0.31104077076067	0.337717209111783	0.321329967696359	0.440773232009657	0.432475089995941	0.465758425866267	0.453254314059195	0.432314181310435	0.4525378906575	0.433829075021111	0.376982638136848	0.44065296160651	0.462663172626117	0.424431025705815
E5004_6_UC	0.375854704353143	0.362569503207989	0.215662946831221	0.365728971327253	0.375664353547216	0.392754469367928	0.297763150172667	0.351635208091625	0.261943999481835	0.3424073885874	0.405209130598018	0.335204641491243	0.301742089848513	0.361653394814684	0.197148562475671	0.360670555507387	0.536493673997574	0.445599410229036	0.502229868612528	0.548891098117043	0.433675428298732	0.356894857963403	0.414416258608863	0.422743789194882	0.382754504935999	0.404196010206707	0.430165985072304	0.421162433343724	0.414115111602356	0.43644217694342	0.460258829938831	0.452545526580472	0.446384791606899	0.308442604187869	0.657847423812422	0.360731512842845	0.363647487266505	0.33149288306311	0.54752332128861	0.442690984281141	0.492759169618795	0.47878855586592	0.46873967936965	0.337689957852373	0.478208687553501	0.448039438937611	0.451684546277742	0.486810550504157	0.437268526479225
E5006_1_CD	0.36800039780261	0.375955963684829	0.178245450797007	0.36556573208251	0.424384524893003	0.466897278422107	0.374664582818487	0.321351418347511	0.245346604753459	0.361039904110739	0.377359858252837	0.350642562888446	0.328066587190484	0.414170288753929	0.335606608047229	0.429399223320829	0.40883547678812	0.423883447473207	0.367456361602235	0.414564656637131	0.387294146519798	0.408566187210784	0.343494293885873	0.334440786769925	0.303028964033771	0.397804937598763	0.406548705602026	0.382491833633256	0.386806196464238	0.461342685490499	0.457550016290585	0.478017659033288	0.310030610765707	0.221789629707398	0.463908845666286	0.328986205834182	0.416543916694992	0.31968375979299	0.546730342303868	0.472652773167108	0.467923868046031	0.527402124740046	0.500919792875929	0.346193487209818	0.461643917536238	0.461682287953989	0.373761117505278	0.467503184822915	0.315791083646807
E5006_2_CD	0.333519871615489	0.314484166111209	0.282498073156097	0.25896106046184	0.390490211405452	0.328436118276294	0.216048161455104	0.311390033410503	0.250252937698889	0.341897352725272	0.288790164341416	0.262523753834709	0.264465238255402	0.161231495659343	0.213442160395509	0.281946972448437	0.469225531592816	0.504659058354429	0.443078387597904	0.437390936034704	0.3581101654884	0.320456361115589	0.2659942923352	0.260518987220462	0.25189612467401	0.41717771109216	0.396651630653746	0.33118074671681	0.391857003344493	0.449156726784538	0.488376390991538	0.497260949779275	0.275314945328127	0.375457575309831	0.35664729876346	0.309774715854896	0.36866304432744	0.353744520204465	0.484324921823167	0.548568223931066	0.401630805273217	0.530044781941342	0.522557141260497	0.305419128076131	0.367835013973599	0.408293114902684	0.416757498946257	0.44516708209991	0.362018995186876
E5008_2_UC	0.538558352716825	0.274245789880083	0.339624954661474	0.505391210620824	0.402105733447043	0.446433954838517	0.380648317356109	0.322679441974584	0.316370281873122	0.171105673279388	0.378967970538336	0.301844993589762	0.15984717395828	0.306428813063468	0.0932987892301471	0.555238782427501	0.303494021476485	0.389534058133093	0.326571518864083	0.391280426582875	0.57678323289402	0.510411063850769	0.522619588073142	0.530018356502305	0.437644461034612	0.449195137775946	0.346088373246227	0.392479838557768	0.424700748797848	0.480112242178741	0.441106919466154	0.418646985605231	0.235501264377751	0.62731344325768	0.444989885163058	0.155279442583883	0.172381549394505	0.198795958990782	0.637540542118727	0.39617249575924	0.453737830985004	0.42373220983445	0.423550537723324	0.200460701115209	0.371654472359554	0.482491789749925	0.55252846975084	0.603652270172239	0.627673781383995
E5008_3_UC	0.451874940954652	0.205549978345243	0.370987544770238	0.600287393455236	0.250545835561938	0.459761237548332	0.35814487963196	0.368971354092059	0.156529572213446	0.0604130745037474	0.30542674071679	0.193448103683344	0.0891020774792302	0.295822017440795	0.125342259272134	0.527892938447805	0.370822753764592	0.38464623682493	0.404825394659083	0.406470642603379	0.444710184004135	0.429351304571295	0.389401935206192	0.385235056941322	0.26328754120434	0.375990325966263	0.290487455806964	0.36633158798968	0.391937798081094	0.296674073456514	0.359627082766434	0.389686072868772	0.351091825288346	0.69734757786487	0.411731847968906	0.0803876103609191	0.1651100699701	0.155553170034842	0.653729333724407	0.391986961981686	0.464260875291062	0.460397583570795	0.382876458111952	0.173562558520372	0.440953410914108	0.528678707153425	0.603830342001725	0.632585176964267	0.768208837468128
E5008_4_UC	0.497771716524286	0.220340982843509	0.358884320551281	0.530530715463207	0.313292654335927	0.432661205106632	0.42706959411336	0.463552656802107	0.282325244183094	0.172828534653663	0.333975575788689	0.303186297371619	0.204557634870096	0.294096481120826	0.0797582074249824	0.490717584311089	0.308090509949326	0.332274165071575	0.30280963022024	0.474264864017263	0.587659797121928	0.514552194654819	0.528837415796098	0.465892454609478	0.457229763238782	0.428925912379687	0.422756882696077	0.455006972410968	0.462163389322957	0.466747338116833	0.445181197934013	0.440151949848658	0.317675139316927	0.595597725933514	0.447230108473694	0.272275040294427	0.258890996168816	0.259953504883531	0.630156126431878	0.340053034538587	0.436244704059497	0.459704305724759	0.383520694585152	0.291756939473605	0.496712358864205	0.538370394760442	0.552560060590472	0.604460608963637	0.598577641364677
H4001_10_CD	0.478003140062744	0.348954753249535	0.403764484652509	0.461785178801015	0.347302588597619	0.380245892924382	0.374681754739533	0.363115150347567	0.305074491974122	0.286126685897119	0.401394622204433	0.377886604810835	0.382540513922409	0.445963656212312	0.338084449999484	0.560323810322384	0.379958377210663	0.343505368223441	0.427693945106801	0.386190074317853	0.476841722023584	0.333697035020969	0.306080459031954	0.415866858480541	0.372205957677819	0.29749735223523	0.259083376963008	0.203385607697459	0.283189451174237	0.457634884906577	0.376738030429177	0.404279582659378	0.28121858424331	0.464445569543426	0.380983502520973	0.193949738218253	0.235064121948432	0.235986850019206	0.601032766497414	0.411399882083286	0.514983878084984	0.453915658886068	0.48966658556777	0.344312048572326	0.437878957564899	0.460836860849933	0.503096242099127	0.524866129813507	0.538411622273294
H4001_4_CD	0.52292446997154	0.0787440883299806	0.403658811394574	0.641864306358678	0.114733991839521	0.233832476015543	0.203725582699536	0.179890101847657	0.301561555125135	0.250428850670705	0.196748297680849	0.254006712098414	0.160639721414729	0.221902570353572	0.17820196879339	0.591434655190728	0.295163537944393	0.196860856407665	0.16972644827366	0.233718696775638	0.153307967129565	-0.084386990153229	0.0176291628856202	-0.101479089104033	-0.0834977333185813	0.0228108275045691	-0.231700990804954	-0.210911097960773	-0.0667224051111768	0.283705553877872	0.330904133898768	0.260105097140154	0.299586997992884	0.657338536952593	0.206935704056577	-0.0154046986955268	0.189130088017455	0.195874748678893	0.665854550867066	0.138941330356351	0.16376883355939	0.358223392060393	0.341567517862824	-0.173840100047468	0.149584195884266	0.619648906944172	0.588219836345669	0.647233510664987	0.677781625275453
H4001_5_CD	0.25657698513974	0.401368600663414	0.26549669126377	0.40097717733432	0.236459754446014	0.393631431667379	0.414604707493134	0.348471066117231	0.311699528490629	0.33935669281519	0.419871445972961	0.410343063099608	0.384395822448525	0.509664745971663	0.319148424957185	0.425303978962891	0.303309296686597	0.368026020423901	0.320291040302353	0.352047716150433	0.46439927489855	0.364297646412987	0.412430246758691	0.438916021605934	0.349494737148394	0.360909205237372	0.373089091125182	0.366464227709537	0.372796346620241	0.418906799643861	0.411195809540844	0.456148402525465	0.213648320439436	0.316811529140815	0.436996583318059	0.231961047037789	0.248321402899724	0.288372755568018	0.412768457536419	0.371727849568969	0.525067431838704	0.460717316399739	0.430622478994202	0.385901849365633	0.477946002142851	0.401389844162618	0.418895049498053	0.392252719481466	0.438434239182781
H4001_6_CD	0.397981750944279	0.382844522829265	0.310548089804608	0.49740778578538	0.284366171305771	0.400220605114745	0.324181082050771	0.373886196847477	0.288429253329164	0.359526774498242	0.441251319493462	0.389137099908599	0.337908190108827	0.416369507458143	0.368312744485614	0.55291909599672	0.430655492252917	0.330153543418108	0.340466291290997	0.313995442815844	0.406228757386958	0.336145033852471	0.287977638547098	0.309685726472825	0.304784271811724	0.294399873556572	0.217714358752862	0.290554682707811	0.299461939450185	0.35750951224393	0.340755868623585	0.377146651194167	0.371350381980378	0.478339258060334	0.326868398485516	0.237760268826566	0.262688093032853	0.274151740926563	0.573116707127083	0.299781366696795	0.404041470790247	0.35726929707296	0.404459498315755	0.217241165367759	0.398855897416908	0.42925515213455	0.45615807587682	0.480765123311022	0.568964081682977
H4001_7_CD	0.476757992479752	0.237060888988335	0.345989144600783	0.539976445450268	0.252129721384571	0.328193540354757	0.306468147161778	0.32060530084839	0.240420383691554	0.177296593528787	0.320605925851838	0.259437985598191	0.204976251174776	0.318394449606625	0.186970836188747	0.496230416981267	0.505414568929152	0.385763016401031	0.316496315022933	0.357175187616503	0.386282119254305	0.513360326528979	0.342223304121522	0.373247629953116	0.182805701858719	0.275273044216185	0.193523957345853	0.242421366632335	0.318692808286658	0.395506104840922	0.361061158004583	0.380199512166512	0.440289542317701	0.592872187995884	0.363461734968695	0.174152869424864	0.267408859397097	0.30148530993872	0.623511288961091	0.365515664322066	0.414149887955798	0.452532507562468	0.371503039773597	0.182402998698307	0.395626482477858	0.503918594318797	0.525792604106536	0.591861317335016	0.65736078794519
H4001_8_CD	0.529181167110213	0.293629220685372	0.437317899689268	0.600079713992068	0.315455271910178	0.410376730894777	0.423390756214673	0.443299850630241	0.292227020002664	0.264061842950827	0.238564088121572	0.302739267233815	0.209336169099239	0.350428282027667	0.189318218471435	0.487300709608159	0.322859442036821	0.451328118666983	0.365465332616702	0.365978659142412	0.358404917566444	0.276447767183148	0.188799684610942	0.300500829120193	0.24216137964901	0.328455483548785	0.215324948575701	0.214421398482549	0.359693123864795	0.345402425941433	0.310522877216406	0.341152966464078	0.35558358129007	0.699286682506568	0.40379357290613	0.0180979653682098	0.183324916695851	0.247323781172286	0.636540423305429	0.291944083553585	0.425592463752182	0.408626837422795	0.266199029046131	0.118393816640698	0.45844849265057	0.527060809059503	0.614334701754093	0.63909592749703	0.746527227081053
H4001_9_CD	0.460973132662313	0.238235619397467	0.352088829568632	0.648735613846868	0.162731174669036	0.451803897826139	0.442699790054211	0.423450983863138	0.298791574966388	0.0808724968377509	0.291592745594748	0.34882976922469	0.107896188214567	0.401335850642532	0.164577236064327	0.583365663878349	0.257330794406573	0.306426080331058	0.312761174036948	0.371512534802246	0.504620424383624	0.448402668318712	0.337190581593449	0.437363682975964	0.215697495712359	0.231416946995631	0.0863843125316125	0.124321524959111	0.147646794062181	0.332485463494938	0.324189288396312	0.418796667955144	0.34562553243399	0.706424628652282	0.445543100715612	0.0825250597441934	0.21667907436534	0.286851548043554	0.677550948838273	0.304769344004578	0.581487938960959	0.363021076079461	0.293622755959195	0.0612300458943891	0.503607184088864	0.605009459729512	0.595719168410628	0.67276119538405	0.785786044784189
H4004_2_CD	0.260073496958603	0.271739618957121	0.0987593668227184	0.380753621307846	0.229459115826202	0.227687023693655	0.184648843792465	0.298916779009923	0.280385139848094	0.25807880758148	0.194964349110502	0.384166484110474	0.291434421482385	0.400435646394699	0.223873740254149	0.395981498980158	0.34494090382448	0.344108156373758	0.305897157743802	0.274836230582052	0.316181326894423	0.237993225764204	0.349633711459266	0.283758519836463	0.320072954062334	0.256987318615608	0.233217380491519	0.247558638046429	0.176705316112133	0.206377624722142	0.164448316451568	0.155901596247818	0.229800675446579	0.264002737868505	0.319097479796849	0.262252124458969	0.16882349516808	0.127649920377521	0.30344348006457	0.237908127190671	0.261823362782123	0.252719103450023	0.249387613483975	0.0750480123333307	0.289773299366672	0.322652075338119	0.303767614313908	0.289956277339095	0.195656071061995
H4004_3_CD	0.358442709913211	0.18282715037644	0.313703749144614	0.25609922867283	0.243586009100081	0.175909831604523	0.218867600669197	0.33936727700223	0.268258504507171	0.22094340510115	0.144278527323762	0.289649738916327	0.299379328628708	0.315428300040075	0.184479274303925	0.253691087938256	0.247537407579011	0.212448250225991	0.137488453304198	0.237589131278559	0.239032142085853	0.200702276268525	0.272599558210222	0.241028552898004	0.299277250235779	0.164776297707152	0.328359012923673	0.217372184426915	0.115813151025473	0.120363188082854	0.172089392203381	0.212469530394536	0.308999471698629	0.262326471837844	0.226932914349545	0.25139237576498	0.2008869351593	0.201196765974805	0.44743071905388	0.298688375989735	0.399916760264545	0.388106154129888	0.254593581975992	0.513312615580854	0.411527466214645	0.336230014654505	0.35455704274069	0.293750323026729	0.334858217501852
H4006_3_CD	0.490694622658001	0.383338019023802	0.202041548639414	0.368563816379091	0.537415025760402	0.548101593360725	0.397874218711484	0.295141560466413	0.226642109970179	0.516616502023067	0.421248324223275	0.452748913281092	0.299947056470273	0.282668745915564	0.282603416747989	0.466054028602104	0.445477427397449	0.461587478657782	0.420053857798325	0.436230452827585	0.327554146668366	0.274627129235979	0.229926622227643	0.246782425614735	0.219512569536731	0.315052213515368	0.450250387630584	0.430788179645834	0.32642824208807	0.372470284491622	0.431799580987	0.412542829561258	0.353795110531431	0.208798784919484	0.401738936965215	0.207061224252574	0.21897305406173	0.263444714737239	0.484251197964812	0.455585254900471	0.529524371620985	0.492817651135023	0.508238573008256	0.462324808675157	0.425060440761854	0.488286595282344	0.49431233028765	0.591982139765846	0.38698756281561
H4006_4_CD	0.412467826539998	0.246016732778921	0.320000480400911	0.285373087927002	0.467780504227042	0.426134910223755	0.336191771932182	0.290413067552991	0.187189607421034	0.389850883491884	0.389629915699287	0.349441093714924	0.295904112202204	0.355088536634252	0.2902773095716	0.372164718784524	0.33295963719787	0.418286269527807	0.313436643415996	0.320159181837584	0.293914048122718	0.233821142454392	0.206385316670467	0.229420985608052	0.328909421501267	0.222688861380806	0.453584189377019	0.363715736384641	0.276696688324507	0.329958237943948	0.344213707371974	0.376640032760574	0.166722220846501	-0.0290234595182311	0.319418873624927	0.258132349194934	0.242834104943956	0.227232535365544	0.350269490205849	0.431007405299238	0.495528487542824	0.480345695322766	0.388558632259872	0.57646741585551	0.427527845632955	0.331416316156161	0.355740003643613	0.413720690697812	0.360913382592737
H4006_5_CD	0.403010543526033	0.32489190948313	0.351237757172241	0.345822940280258	0.45783674581237	0.439231063995616	0.331756641631108	0.23993316290881	0.269815043337733	0.434787417069839	0.414897469055598	0.387961669538539	0.247799962311695	0.376996312022866	0.372920556563711	0.409876272984087	0.389861369132338	0.443583117387831	0.325259371669318	0.36276747418455	0.328919357949491	0.305593971289842	0.233989964861734	0.257255151160626	0.252711362474402	0.281984546429156	0.438274579996677	0.392145739427684	0.328038514923974	0.358646706849811	0.407716872260386	0.406643389973463	0.31370305653913	0.194328822345866	0.347058120664739	0.244893606228597	0.257087407342094	0.316538760448188	0.490942648225645	0.497019633159947	0.469914623008801	0.580258773294227	0.432225147560783	0.460649531169899	0.369143350138463	0.354441320225482	0.411036066341692	0.532631098946154	0.41680928505201
H4008_1_non	0.351135530797364	0.113585434739645	0.258132454213984	0.361287074939067	0.294009574676767	0.293809652414208	0.322202635809084	0.271631653522079	0.390584839874555	0.122644063650989	0.260571332977239	0.193754061689274	0.143739818233732	0.285512675323421	0.088629342000493	0.351731640772842	0.313417896640188	0.432727771514779	0.313817985660289	0.316705588582352	0.318357297409528	0.319058756189493	0.34880953885886	0.384167632877418	0.2965647048043	0.32317179825806	0.34854997893567	0.360758499538106	0.377131699218331	0.382917125629402	0.373841089067651	0.355981603890651	0.118274106213273	0.400113808890913	0.347568454528576	0.236462862644617	0.206687044764902	0.239953739916658	0.398794342778917	0.231072953686415	0.332932904484708	0.321587917037259	0.317419524354568	0.231152874764855	0.193641794658884	0.449818547532266	0.444341368987792	0.470404254394025	0.270741469706354
H4008_10_non	0.259545457636848	0.304955354323044	0.181889054194645	0.287932368983153	0.310200620975339	0.406208515670527	0.2923186049553	0.341536963533785	0.236272539028726	0.333087371936827	0.423377499102065	0.313904150644652	0.290578959842144	0.261811867474741	0.248059305203923	0.313231168100926	0.32957261298898	0.352989348454218	0.375368734311129	0.281048901930507	0.352576365145822	0.2987349276274	0.373195583757247	0.357643980659156	0.367616381512184	0.382636925251481	0.343194251395361	0.331156208364768	0.325302304411854	0.340912871603583	0.36048358172493	0.363447124531688	0.342832387182593	0.276061199295303	0.415187395664846	0.259209137175314	0.24414903420301	0.283132221890022	0.43656004743101	0.311523510258762	0.466222843721395	0.41818337037554	0.395910171565053	0.317539027849852	0.440178670281507	0.378899546562084	0.328209867215937	0.424221477479195	0.376702045990717
H4008_11_non	0.383163857956838	0.25031939199928	0.330949877889178	0.266262317438359	0.38603755466091	0.344527085765973	0.309640509586765	0.320827443199408	0.373495308945142	0.27859134805917	0.299891223319106	0.248860284285113	0.193216499722359	0.213039469588402	0.162813737354456	0.252256507073517	0.425975894310369	0.406633486103932	0.407166729791649	0.348166365098201	0.407019345970122	0.288168525471355	0.337703595906996	0.349582358250022	0.477011651867126	0.428611221679155	0.3538516458359	0.376410531053861	0.33362514251156	0.328086054827324	0.371939831263387	0.340716268147254	0.305962078159381	0.166035892686727	0.37326816636279	0.2581615291341	0.250880520382626	0.259686029948297	0.423264182123795	0.360391008991045	0.383217031101773	0.392692193743649	0.354574279875299	0.382795743166349	0.399343073327435	0.359521716496528	0.36177330395315	0.428759994084773	0.410995861054416
H4008_13_non	0.422956337783675	0.291876052683134	0.327017488254826	0.392657980287607	0.407359488505092	0.508100519446654	0.2712770845337	0.363305517436295	0.196824814007017	0.314915405010114	0.300846685877479	0.362203521587991	0.314383559035756	0.219989094346393	0.11251441777662	0.321387296554109	0.406355739147948	0.453307290491404	0.435529932741772	0.426017006851905	0.363998020611268	0.324774578009239	0.311751331516787	0.306857524443631	0.266071003359553	0.422892291378251	0.423070520907011	0.349818068730499	0.372248810235791	0.446438767700848	0.450197246787718	0.467913077738607	0.415257771670671	0.2424069084317	0.466712882286356	0.275995679229564	0.241662469212825	0.327029574643023	0.542546286859827	0.494298656309497	0.464098932171621	0.510329095885191	0.513577689884837	0.414328458673202	0.441288521179215	0.559632006801283	0.504079362444926	0.581702374032526	0.490166492147778
H4008_15_non	0.110498315237199	0.273869294104625	0.0991956810026387	0.261867870907477	0.289295709151387	0.236783433355933	0.263454632886664	0.159120423553086	0.28032745329268	0.387152030685589	0.430204425388564	0.40250216494507	0.276438803604461	0.320993189801161	0.338070196990883	0.338948456318115	0.302867652969579	0.403841129908559	0.278916942989819	0.181587182130855	0.345314825133587	0.345645765099164	0.334065779090073	0.327371204815587	0.282404224703752	0.243645539903586	0.267500286242339	0.314320048916772	0.35689421481985	0.281520168574743	0.285723260571643	0.285831277905938	0.281899331115471	0.261738484936583	0.37008757060843	0.209206493037192	0.190743280978514	0.227147530736574	0.255677781751227	0.107440171266166	0.143464307505219	0.175049363565394	0.147438395464397	0.097134680619656	0.139537867584992	0.231597188857619	0.26113867373183	0.131562908529031	0.124896021977192
H4008_17_non	0.385750112842556	0.367801152827743	0.235660163273862	0.400934294646847	0.32052991353719	0.465299763716427	0.447883300421813	0.375225493237188	0.267600995169114	0.377329816792547	0.3658793983644	0.322373399245251	0.302916592323919	0.412114960158161	0.245253383125547	0.342001412109517	0.474588032063194	0.439694880690609	0.471806310146526	0.419131182043124	0.48313169532485	0.432677045179265	0.439426960722641	0.439353455478249	0.341870435691578	0.476193141101403	0.488985054222422	0.413647455582375	0.448906908259349	0.469101802996287	0.476391681323142	0.528068677943943	0.439080190483992	0.321246718019263	0.438367058656446	0.363782005732289	0.31126075363267	0.359664648595949	0.557890520772381	0.377335817382865	0.508334059562414	0.482721656022618	0.485362996450424	0.423067366661533	0.525534166989929	0.453842941676992	0.469370336558318	0.45030714564499	0.462219403192068
H4008_19_non	0.310271241123154	0.23322739350736	0.16873215640432	0.270654212174073	0.178829753395435	0.315956643504739	0.234409577252214	0.20632676759195	0.194710088067064	0.232102823399016	0.290482247495619	0.250911287943326	0.239107864022454	0.281147644725446	0.117668674042578	0.266740598352104	0.340017883721176	0.351464404094134	0.395948769488446	0.319035627960735	0.451499479223633	0.356238704474664	0.460781148170475	0.378752519706155	0.446737674251707	0.461306854414843	0.470227476891305	0.462930281301968	0.462015646157723	0.476168076061726	0.37471316527058	0.392223195782354	0.378937124966118	0.299972298681557	0.524105832793578	0.328650848482354	0.214884053216371	0.207434919748476	0.447165331724709	0.327652335340231	0.407346998214387	0.374258005893017	0.415321484331488	0.262896590437457	0.391212390266176	0.339412670096878	0.340450174762838	0.340787896842212	0.422792459796642
H4008_2_non	0.337324366524095	0.347501309857191	0.231780531492677	0.334505292640728	0.314214784877967	0.426433843330138	0.340714940905559	0.296460580803023	0.246745195412769	0.252913415030893	0.241252247602854	0.200892842324152	0.191425959454982	0.312120443719174	0.187268952236687	0.258380309833706	0.374786126589105	0.385194495978344	0.43428281144406	0.393341968597827	0.316938863955293	0.347306959841029	0.330408736936522	0.399510423461046	0.305089085245454	0.465385243180844	0.379553880016599	0.399724605787973	0.412963891054181	0.400972727456913	0.401098955842268	0.434832395798866	0.23696113769465	0.347494614793314	0.420792502369096	0.309250093538742	0.268609694462131	0.288145547573382	0.464771612111487	0.377459333370085	0.494957378672484	0.416652053532904	0.431222020130853	0.366164320984516	0.492640930684886	0.388281339224674	0.41954864808272	0.441620980386017	0.461074663094488
H4008_21_non	0.0577801421709113	0.226738871538467	0.0864770011212972	0.122153593011568	0.0605650805530448	0.210277152825571	0.242587710010087	0.216762023960777	0.106174445090132	0.208167236939133	0.175476728066313	0.0894120691262806	0.14424586322011	0.153047449341642	0.157919964542531	0.16324193383606	0.359213138999279	0.282497663389743	0.230179218828088	0.106522036655544	0.303110294000483	0.289988092200241	0.257617812893323	0.308843772225404	0.290307524919243	0.406754246149835	0.338012368696922	0.326194465701023	0.360548280214442	0.35963669990556	0.295149595348187	0.362825503042237	0.180190827660922	0.26294883905989	0.284362454472577	0.290528581192195	0.244209462715083	0.327365971337943	0.245574902301362	0.191365584706854	0.310107325605377	0.199132959613252	0.297237060344961	0.192121921520764	0.221813063674838	0.283367417214082	0.336113673286264	0.269539195326836	0.294840668127755
H4008_22_non	0.386483083168093	0.268573167556407	0.241173248824233	0.309860600914808	0.316418694638569	0.361193663795028	0.261760869047207	0.3426083583974	0.245433235069105	0.175435286450564	0.208187047605654	0.225290944887944	0.267284944389157	0.158241665365032	0.117082623751946	0.252336067239974	0.44750571455579	0.515132319103219	0.454243714009813	0.469093875759239	0.419714321072321	0.320892785993776	0.341297378138138	0.34894907545555	0.395841220487792	0.486818798457301	0.513982192191935	0.415999491693885	0.394490380221978	0.523154932699227	0.48218767271764	0.476125408616088	0.267181959853342	0.295242123255782	0.422752920812958	0.322431131419567	0.20250714082713	0.278409721236237	0.455940879524679	0.462131723752957	0.46444491499862	0.504935323262838	0.504473547944603	0.354682265370841	0.400546079590482	0.490355255506763	0.475603081912223	0.512541236730657	0.414795239968833
H4008_3_non	0.36210783739093	0.230572332046625	0.207051906727451	0.292362300330472	0.283371999291448	0.350078865605839	0.268101324534041	0.300867372717437	0.174220176318587	0.229660504574848	0.226281405636619	0.212694393088426	0.161943115162609	0.218343206680945	-0.00268201451063983	0.204946714768621	0.374293384139464	0.416354969633051	0.381099614034303	0.360295576603792	0.363386384541736	0.299290835720252	0.418502297351899	0.348365782675621	0.315378777709532	0.31519153727915	0.49537712352501	0.380008880602619	0.380933836717513	0.437049383746368	0.418168265130665	0.447739914618834	0.476648099836223	0.320148026311196	0.420429345361065	0.236217368973045	0.24472432165576	0.267492598604102	0.42444828355705	0.482708404055156	0.517775760116501	0.558276518596542	0.495227706577884	0.434024453677914	0.421051173175228	0.428205182627048	0.491063910259142	0.546456835409662	0.482071091655926
H4008_4_non	0.354544319107984	0.240869775444658	0.262007241565192	0.267484575259743	0.34961051908123	0.395870398115667	0.299152100791161	0.342508896717114	0.210574109334162	0.20371590295881	0.192554465978876	0.236275584447683	0.126855137304165	0.222895275314524	0.0294643681175432	0.1702616363461	0.395015959667992	0.425527446409656	0.393751167022459	0.421721826809011	0.360530983817965	0.316287743633818	0.33121112799881	0.323878888134815	0.262731059294383	0.35581670952716	0.419168928703247	0.390636009036306	0.372262260844473	0.414046321473309	0.453247210730353	0.457598254389926	0.23006210025958	0.268379478214147	0.352710079548243	0.284777041789716	0.214600533457051	0.298719218814993	0.508389184328688	0.501564225376187	0.479704428248732	0.524847570678472	0.502306331758088	0.384522614748439	0.476630469464504	0.445157374215309	0.471049585982951	0.551694942989235	0.427834927458322
H4008_5_non	0.360556040637002	0.329317211165372	0.26498080236765	0.332138298746569	0.344137683325112	0.425619974778883	0.300668522093017	0.29306195395922	0.220951807591909	0.267420174376094	0.249123908328083	0.186389292304146	0.161621946015884	0.281739562853048	0.1138304953594	0.281315642343826	0.42878443424607	0.482100116588511	0.426789540346764	0.406846622746348	0.257267111030677	0.354827697077663	0.27820655638659	0.309165243479144	0.264113471028677	0.489435762701887	0.447151047741552	0.401400276754484	0.436363979005966	0.443520505621893	0.409035196412238	0.462846167834986	0.236425462053338	0.305619167951855	0.413016516665769	0.322837455278887	0.345761132356412	0.32358435103101	0.481122168995938	0.518462045094734	0.482221400006437	0.517597914301048	0.494381076182279	0.358962751750818	0.3866548865817	0.439871106123051	0.444281399699056	0.519174853106241	0.389582758471728
H4008_6_non	0.409249120164469	0.265592886170165	0.330471541088573	0.287121902548628	0.410261251647934	0.480219907460333	0.241268667315307	0.298692427737816	0.172323725556105	0.30796198363493	0.30445241035808	0.217561216664366	0.19552117469933	0.17983289127388	0.0429986154009796	0.184431678890746	0.390794123643431	0.481453305459891	0.427125644271277	0.39186083865172	0.272419642183499	0.286976876171246	0.174747783671305	0.242100838436857	0.247712107927699	0.331391426100766	0.343154308603235	0.296683594206198	0.344084678199442	0.363065374951098	0.36990549034137	0.410614847080947	0.349214352099839	0.381890511193753	0.366050171054086	0.327949808415999	0.221775075664448	0.342133631156684	0.545399397307543	0.431553976288813	0.426354830493913	0.4942776747822	0.497789613729573	0.342403712874737	0.37021726200221	0.466308459048708	0.342388317948333	0.466604467735169	0.391379244622884
H4008_7_non	0.43994565051677	0.242419897879585	0.321050499699604	0.293449574123948	0.392638392300492	0.434529206822321	0.326817455605351	0.336297122649823	0.241777737764568	0.261187698777758	0.206576813334902	0.306889702661198	0.207679010616284	0.303219265674722	0.0578158488914368	0.256993717938008	0.415590989461633	0.480764147786829	0.415692264964426	0.429049711853652	0.402373126957163	0.375236736457331	0.294781836122882	0.322242893476937	0.280775245179435	0.470684217500446	0.418842006504381	0.399518866291857	0.393329162829699	0.409044952835418	0.446108073906266	0.474382103732606	0.29647770065556	0.343512922139901	0.356324429777375	0.342753791118121	0.222140672535867	0.295027427914623	0.503568834494077	0.445438301974915	0.426458266913423	0.484445562791556	0.415296824963909	0.388015842755529	0.414758508155427	0.502229004808617	0.495334802701356	0.530165254567228	0.497572483234734
H4008_8_non	0.434170526784032	0.357671954874213	0.379655121344016	0.399368696881018	0.357508709437712	0.506123954860469	0.421150617961312	0.298128764369752	0.29784751010941	0.410404017741608	0.419460969550174	0.413278558802498	0.160553377243082	0.389012382526852	0.187195994138008	0.191181324770134	0.473003120195078	0.417273623849431	0.414887926705649	0.378145912198576	0.367596207756261	0.414381764013374	0.284311094067514	0.356353554707813	0.319268884756619	0.406050385658956	0.381141876527636	0.388539139480865	0.413854219453326	0.354911941626123	0.444336802221321	0.417245765477858	0.505477866036026	0.337575956912496	0.324091369231537	0.41318402618623	0.317870502861697	0.422772668065723	0.496886136250023	0.414421441138017	0.450793641115495	0.493520623442127	0.37022409007904	0.378395229645911	0.437355497858672	0.494598542175927	0.406027930774605	0.48667965225963	0.417922632195917
H4008_9_non	0.319951808960371	0.223747097091104	0.272155610703104	0.177827100501137	0.232560284323074	0.308552867188242	0.277075839881095	0.331714185585364	0.221274953957948	0.295538725088682	0.275456305384623	0.121221693999715	0.181404049246933	0.164220711102619	0.211400706678414	0.223574239330155	0.319349813388764	0.338151592044673	0.34897219567416	0.255800142001229	0.365775387225066	0.337099152126769	0.302941382178623	0.332086781773957	0.301600931038332	0.405402086292402	0.409448720491373	0.377134252944284	0.379175107595953	0.401607851579081	0.336824569279337	0.373265064006855	0.21579437481553	0.150113481487034	0.402719028763481	0.29314662373656	0.171530901508828	0.251212088934749	0.419598577424642	0.351860928231483	0.393775817145399	0.341567094618179	0.356567452084441	0.289223973699602	0.273422680504746	0.362800452818819	0.350469539421109	0.370439135707308	0.382237699548463
H4009_1_non	0.416341239960941	0.441669455168025	0.262896839369593	0.334626859279777	0.355556895725759	0.446942896832358	0.384423732246633	0.322182552877673	0.280350252920297	0.384293948458371	0.411245581234387	0.362393426529662	0.321438853358926	0.38938137804331	0.316474749940079	0.417692876011923	0.423160194850385	0.45716626948239	0.369544185339766	0.470797565236355	0.443969427011159	0.344375673590378	0.354273038021409	0.389823918443947	0.301945868734538	0.364285943964583	0.435742277492859	0.371883402180023	0.351149155282806	0.466242585966419	0.473708125487637	0.440584558888342	0.379201093171395	0.302998860734949	0.39891541380672	0.372855239968018	0.294003753765804	0.354992506913032	0.547318593868675	0.444627481942332	0.480611546562168	0.510884022012839	0.467181661335899	0.370435058912885	0.358418921048107	0.455543727420771	0.401090429133264	0.489932497697325	0.358877049680319
H4009_10_non	0.363436247094304	0.357605492782326	0.274079139031382	0.275123579495587	0.30364042887947	0.397208525510629	0.382320240068106	0.268633280379365	0.269015271538045	0.320719393628629	0.331346471120665	0.230860264689109	0.252335912012364	0.290261543418241	0.259323833800444	0.267493186317801	0.489489072653385	0.401637296977865	0.427887689129988	0.450317674622851	0.415639983119338	0.373148768455364	0.33034949441094	0.295839609661196	0.326006359538906	0.394846068129623	0.374493718346198	0.350652208627029	0.431515191393636	0.408238361648042	0.426842067622815	0.435196845650365	0.466034947969685	0.296505538692307	0.338327942785554	0.227064697823529	0.242352700366993	0.231517125279492	0.465849430812117	0.371432301693216	0.423467535659022	0.433502433362438	0.405264409919531	0.360421441173673	0.344654537212388	0.367528810799889	0.357012020993415	0.428221197068159	0.412280289842342
H4009_11_non	0.417578744820574	0.416164788656736	0.242059859112682	0.350872814642463	0.372765549180203	0.486128734983437	0.339779204885338	0.368442276125522	0.223348803500513	0.395995641448939	0.36258234607433	0.327560322245239	0.323429805221315	0.331545658291313	0.258908696143232	0.279394350590974	0.515730592251957	0.465916923408986	0.477307798236281	0.441569918883556	0.456785447258925	0.414086465276227	0.367563007374252	0.405235287061722	0.305519369835638	0.464439271341145	0.434682117672629	0.431605350935473	0.45256899096742	0.451179650069483	0.500041765770904	0.446115799099295	0.316488086582938	0.379683706078387	0.381841672472159	0.391049284321101	0.295245371726697	0.426052989300803	0.479715350055809	0.466012585512419	0.541374873820905	0.433326966908015	0.485973453948057	0.35073535382299	0.367176992092011	0.402167159274965	0.363083733947589	0.416955041082324	0.437577538764541
H4009_13_non	0.379516892032118	0.370342346591283	0.209122533150854	0.27494020414605	0.361084401153823	0.398743983472416	0.315744908794274	0.296584139105089	0.248984798737067	0.355625926407826	0.296622326901325	0.231416087462052	0.149829575875246	0.258662629481879	0.273908301053167	0.192249843518892	0.44936930984206	0.384886871025124	0.426677402300015	0.404766842834367	0.36962791070772	0.275266354795095	0.18574699978255	0.313869330357562	0.287436938131888	0.414728209624283	0.384205168619372	0.392501952694346	0.363692249217511	0.394928810209874	0.352616751938604	0.359782203348384	0.371471028462947	0.20179116459845	0.39524271714793	0.237238445412232	0.209291012169621	0.231517301978184	0.415995494664405	0.332668579321907	0.39184925299888	0.320316931733066	0.392511631775925	0.286257145476306	0.4651189356027	0.385094103438011	0.390608199162052	0.431967552415694	0.367055191997972
H4009_16_non	0.43187106266405	0.244894028113954	0.322632644872045	0.30978383476422	0.299800726988079	0.395826610123274	0.334396698121221	0.291923810613177	0.287474577346467	0.321961947694279	0.338755831818851	0.295952996484396	0.241400818845745	0.265953476492069	0.209130126736512	0.296440427400221	0.414631883216753	0.363783787509537	0.356193743225184	0.397095102929297	0.419345160898445	0.383125516379759	0.301841713632609	0.320141194611889	0.317683161724645	0.326753650532283	0.328827206547397	0.346391478823561	0.263834083323294	0.380403110314315	0.451098512599567	0.433104335932772	0.334560554670574	0.295888988875655	0.33917890758271	0.321754069917219	0.270123396104966	0.362483370407859	0.465156235239364	0.393114355881769	0.399734156950616	0.446610966728341	0.406666199556816	0.328492519461576	0.470776100964893	0.401354746545397	0.425677321165202	0.39815122860967	0.451098869146341
H4009_18_non	0.367102055129466	0.303183034669928	0.022904805789633	0.34750382458195	0.361031520149353	0.338003285841022	0.279607566052528	0.303192679876071	0.326838807388999	0.0812731867412871	0.118216010768926	0.208199305115691	0.147312889728589	0.176040352349171	0.0851530057701634	0.212618317811304	0.370602429576526	0.530623911745628	0.314966044135447	0.363625019519344	0.440037611345402	0.289331149776464	0.118425447190295	0.299400473905906	0.275968254381867	0.235700407372514	0.382345556519118	0.326858124830377	0.425550374490699	0.29446923973961	0.401416034752688	0.38692985767513	0.399799067925754	0.281047489984455	0.386831628599231	0.164839708771673	0.201479916386966	0.209042814583368	0.315768402228564	0.171359646791888	0.257863376014549	0.406063847345907	0.176301404630102	0.229790596436988	0.469757465970339	0.428369570597098	0.267284411179417	0.509498419910536	0.445972384692277
H4009_2_non	0.390428545780792	0.313952819238425	0.21352120358872	0.353334119270788	0.347457211657311	0.401267049140178	0.335647797828969	0.323161650716412	0.223425395748439	0.269627393802685	0.326024898268493	0.30319721179804	0.266882682273045	0.385033917487162	0.190420076763593	0.281332285014712	0.335158442468442	0.369431818825216	0.364177746887041	0.447421861070944	0.422942494037307	0.345016041288356	0.288671856140026	0.340362028136149	0.298802438010762	0.347643716238487	0.344359874343605	0.33121036555512	0.380965996379112	0.40322958404769	0.439613427310471	0.391603975269094	0.430338419717118	0.327647434030904	0.432340016596409	0.268475894741243	0.225181939696197	0.27243200696257	0.561036350026724	0.396534311964166	0.497684699179114	0.43469714158429	0.391134802850693	0.38411651869251	0.427839449420775	0.44224660539775	0.386645999069894	0.354883765555586	0.430111142197712
H4009_20_non	0.377917975469063	0.36443673233326	0.309979444266896	0.36312423066486	0.359009135107967	0.328346333508837	0.318669088377594	0.400854614437828	0.336874614627236	0.313133165104528	0.375876571859813	0.374470878019367	0.418096759751928	0.397337399424071	0.460803011011404	0.406185014285912	0.380823745814839	0.362183585513467	0.322032488775786	0.393587581236316	0.403442940551113	0.272937417907277	0.390026804873348	0.388207277241346	0.372163852210349	0.356755838672121	0.315054733411993	0.343759694644396	0.319774615377315	0.322662590579189	0.31843320708536	0.308538153944357	0.3230698472237	0.18337680093497	0.331218885676131	0.212093020139779	0.238262865981424	0.303999193455923	0.352923043061236	0.324815581979882	0.410183648015997	0.275995549143097	0.32650091646198	0.309300794530775	0.383702380773742	0.356549252451101	0.283167253937377	0.301783013473719	0.338678518498705
H4009_22_non	0.505543628068202	0.133661501622735	0.295214491418244	0.26406079765089	0.382901215085196	0.426528146018912	0.225235981475231	0.278570534970453	0.296023185746594	0.194500939010693	0.241714832687398	0.212616846379715	0.249678295079546	0.161492025422143	-0.0477401588853203	0.115101111882898	0.347355360138785	0.382079496544531	0.405116931532398	0.404635512846236	0.425153784297852	0.269345434663228	0.295391052178431	0.206122601702544	0.346420047758902	0.355811078656242	0.340047352649534	0.343181320362164	0.21741854617001	0.471096121577961	0.433440884190975	0.429029690409851	0.372275273806083	0.207847862863832	0.441498177794233	0.28507462616841	0.167830343889179	0.189365599268112	0.467703744898078	0.32640367451235	0.35762635999457	0.361558904721493	0.396149596962618	0.518332192396139	0.524348512068981	0.460021251258499	0.4566596858259	0.4462889997131	0.548405999802618
H4009_3_non	0.386311954073752	0.415005470295088	0.283509258685854	0.395648700160872	0.383071332506139	0.410798263044207	0.411753014332393	0.396681309521641	0.29048771770471	0.389570280545757	0.381885765496449	0.385762819134686	0.4021366804227	0.38006167919638	0.398906422733439	0.328995457107147	0.44163323163217	0.466660721686977	0.410194410452671	0.459186433024666	0.462660322726182	0.311994763659899	0.37802466896772	0.439213721294008	0.415931956222963	0.418544407565441	0.403886463132594	0.372486442616757	0.409304889539622	0.410892285274973	0.416597114263621	0.4138988216466	0.344547296995096	0.273354505777593	0.405489595989347	0.346553307104282	0.352134317642685	0.337366595318953	0.530484326864879	0.430661822119033	0.451939996195919	0.431350183886736	0.406618980669626	0.357592360928882	0.50177475614116	0.473089791932345	0.429717782905474	0.486124711714712	0.442753494583216
H4009_4_non	0.384208755577711	0.243235639618705	0.246779533563065	0.272700309988632	0.327175788272635	0.402889750667846	0.277470149108207	0.379909440105199	0.148961342100373	0.23305631978952	0.275725727233534	0.264316868699506	0.283662520518827	0.332271061088799	0.0550672990491496	0.19091109266924	0.370546463260509	0.424006490369731	0.371945703678627	0.468164498965238	0.333502685090904	0.29316434758817	0.22833650608278	0.27244277982347	0.238395869472611	0.303272312684605	0.321175911481407	0.267704185983964	0.262765193517538	0.368220726780094	0.399517441969216	0.413716405954513	0.209434625962093	0.185211663633829	0.364850530744744	0.197532453513775	0.201493077467347	0.193897844341214	0.427298037192547	0.405564989346827	0.387306019439982	0.400840753406214	0.434731124087502	0.401331429807334	0.451755389728834	0.420153577535559	0.372130457832419	0.478895535380495	0.437047495709377
H4009_5_non	0.347338749070088	0.395599217738624	0.245702037420301	0.30355064037725	0.2703126587803	0.3592310396974	0.40921572783784	0.400606861975233	0.224023952212299	0.374454849699368	0.377737650755135	0.323395087223365	0.298339523958258	0.381217521077692	0.291958673289963	0.310600563452725	0.456228431517475	0.451604574281181	0.393489344817244	0.428773295945867	0.408604843611664	0.362393580668703	0.358927600030874	0.370403931014072	0.273907250245637	0.481092923044335	0.373687988375528	0.378553288733626	0.44264435177251	0.37707005369636	0.43457898410949	0.427530432421925	0.427788255062819	0.228898024196311	0.342095019904859	0.303297820968168	0.333569605173612	0.348346725873754	0.468627883795103	0.398501039411865	0.429778388471584	0.454049185477637	0.426165777665081	0.318963499630735	0.457156802026501	0.437401002442934	0.364667129978253	0.401480321114184	0.3194723641023
H4009_6_non	0.393819102740839	0.37017380026596	0.178708500428277	0.317961249637574	0.353435333855432	0.481012450811635	0.336009745763924	0.235000046663938	0.256066550407152	0.24026103557475	0.350838449561781	0.219563369601186	0.29965410715387	0.353195321021218	0.211286948495084	0.240486484438805	0.41285152138331	0.463350790469828	0.363008164344336	0.394834902324184	0.299340912514907	0.279656649494914	0.267994993140437	0.215670610627872	0.192714168038419	0.376519405967911	0.383182272539467	0.306781583247764	0.292596925046052	0.346336697361478	0.375457271830941	0.418590102449188	0.301141289853852	0.31046290627297	0.394067008490963	0.286176303327932	0.22067263675893	0.334745985245244	0.413544919447736	0.426638413068374	0.468113912611587	0.433694748045014	0.478008105818936	0.289115497588412	0.337915380263856	0.44568489174089	0.389478094870619	0.478828702525083	0.364960821171682
H4009_8_non	0.325262955722242	0.295030290704012	0.22297421603692	0.266088043390254	0.283503343808443	0.373682309515824	0.318307646763871	0.282870395262607	0.220568805081619	0.240020968760026	0.296072712321583	0.365385967080534	0.306189838390011	0.396294635145369	0.268145988008912	0.258890947141311	0.384088523374192	0.398584398907981	0.391187825165455	0.424467841538023	0.413195675807177	0.299998731298092	0.188864585049452	0.284096452225944	0.311373725186989	0.33949865157144	0.382281285452304	0.385010032425962	0.373157425558508	0.315615559110174	0.395985712536451	0.364782310132957	0.295292809391132	0.222008886731884	0.412672656985166	0.198186633093883	0.228760826507095	0.305407688624782	0.37531612586121	0.368922571864071	0.476517825740165	0.405924341086355	0.360557400219287	0.35822648820591	0.419571135297757	0.391809349300349	0.405706262963148	0.363977952560165	0.286764695120051
H4009_9_non	0.466946462611925	0.273990886957394	0.169067849689262	0.369338523827516	0.304734745752686	0.397531588889933	0.270351207618573	0.391784511697191	0.183978990913046	0.188646794235077	0.317463002514314	0.283459288862681	0.324425185906062	0.351454101382085	0.294341558186943	0.253609446115406	0.372043195406749	0.407395743731749	0.356568210831539	0.491577703596332	0.350814418938941	0.230809852483102	0.308947827187905	0.334496535703241	0.291792782242571	0.374073421032786	0.369350312951656	0.326675305485628	0.363737489354098	0.409019797348127	0.47876871361081	0.401898310562237	0.269334132451299	0.239721300397533	0.356607382956475	0.30199094447057	0.217865091181008	0.275157129741978	0.397014433783654	0.386245891376516	0.448142165163421	0.378692218838779	0.398143591534214	0.370274626185609	0.458458008278729	0.400532941839436	0.345726148969598	0.354010517951953	0.3517000457188
H4010_1_UC	0.455589841537026	0.286347856817554	0.359757729668293	0.391375467436424	0.367956954443317	0.457286261359304	0.372355612107145	0.378171068700004	0.298372000189464	0.26212363206957	0.237047573929843	0.33018739584931	0.310546309002098	0.371346239620356	0.152900084144661	0.328928728280829	0.500598380681678	0.505877487569386	0.483171443897253	0.50363346641426	0.505663409341975	0.381933374425498	0.408121187613105	0.399768944649695	0.375000759353126	0.417122077300121	0.440117282911489	0.408142544294239	0.435361439307458	0.502474074818036	0.485376129055621	0.499595146581771	0.426952208656893	0.3960593773074	0.441677963788974	0.285077012828883	0.24791030349296	0.343237344736075	0.545404841669799	0.568029194540668	0.488858642513791	0.524791023203337	0.518950195804846	0.332472319702869	0.349097282063911	0.466708979774697	0.473322267986081	0.537015509820014	0.423187204201024
H4010_2_UC	0.358142430652629	0.18555956120657	0.226405328916207	0.592961411675676	0.274640499581104	0.431973029003732	0.28723923061422	0.394498205857023	0.106507428055386	0.101730849731155	0.302441944145459	0.333362394214081	0.21524195331116	0.360574315355387	0.182034714358182	0.592174597496962	0.3615160196067	0.321322786068859	0.421324685315611	0.385078103380213	0.360846825926202	0.249944591386491	0.218360802227756	0.194496674070687	0.169119659402835	0.224263584707841	0.0312646205266687	0.058350164363048	0.223511662439123	0.21334296927662	0.228529050645763	0.260450013784788	0.356464977489544	0.750276974363058	0.419811327508275	0.115635159565651	0.257775815163555	0.190240039899219	0.628209844406803	0.293238971341875	0.454736415021587	0.227722716518371	0.366449584631359	0.0820636356032081	0.633259364778157	0.400518863690936	0.41152415078704	0.491286308048353	0.786433495854068
H4010_3_UC	0.533669837343145	0.122889649310313	0.459843455934963	0.612116111452408	0.375626061915133	0.444074719563772	0.288570165753073	0.196628186616363	0.358893241115068	-0.0267047732643949	0.433846502268188	0.17795114458891	0.201474355198183	0.520428012734509	-0.00486333577047823	0.564306574305772	0.484036543630431	0.178625934059531	0.219593185771001	0.414732635199493	0.271987906798573	0.319561146192578	0.045609794850583	0.110423246842848	0.252420833285123	0.229277872619713	0.0495263948504093	-0.0518155664827837	0.172027332698411	0.379698360238105	0.3359316728478	0.398194358351524	0.350501094424441	0.632863912606525	0.237686800606827	0.192709243023695	-0.00606826590391143	0.479463850158077	0.624112772534747	0.259862888473195	0.39441755641754	0.238826660397971	0.318444567441713	0.170599644122893	0.573844299224025	0.540511841751292	0.544296967196429	0.549257767073316	0.620039602007065
H4010_4_UC	0.368388781217798	0.284073292506199	0.260569646538255	0.287536564703762	0.369317812743202	0.425253974115671	0.344628943081636	0.339037598897565	0.263149047265355	0.320067798044884	0.344149497041554	0.312875458081381	0.253523471426756	0.390311642034295	0.251997345036093	0.359435600963566	0.552245529695165	0.518667492811326	0.513715434579808	0.562122856362953	0.469309322626795	0.412090415937526	0.393437520450714	0.425225553343651	0.369059765443673	0.450031062423373	0.516615945069707	0.459133324189866	0.423560466969679	0.496268113075326	0.536646990972046	0.52516055447729	0.30110119501496	0.299925400183441	0.366307960762563	0.316704545588572	0.307885350658633	0.42313622748335	0.485548258641418	0.511037953687207	0.504958065458326	0.550329922173294	0.516012997500535	0.314015496753453	0.376951172863713	0.438235139606452	0.424510111510805	0.534372513842926	0.355586182921382
M2008_10_CD	0.435745164055616	0.332057865366873	0.301647778570514	0.495646125161871	0.448887016928501	0.420508048068996	0.377186579877323	0.325756410580445	0.374338213712304	0.299551894373226	0.413880581979467	0.428495602439133	0.331364990851368	0.427951251372856	0.307318050603865	0.539784958972638	0.43407409054935	0.489082422887154	0.414041096292814	0.473805229622454	0.525307831592582	0.400465170647591	0.445298091340833	0.47988005672692	0.435837678388286	0.416546627356522	0.434246104539714	0.390001270083229	0.44486292752398	0.468156533414802	0.44329571259128	0.441467277278773	0.428817017164371	0.487705892659571	0.468212690218491	0.319466043996721	0.2890840961166	0.336673150335591	0.573712904067609	0.404968592071845	0.443390103030549	0.378500911336325	0.40809665997198	0.223444561663311	0.279819594518319	0.551008287857608	0.531040582089304	0.570080756498888	0.513070795250241
M2008_11_CD	0.450294411886525	0.454991666942494	0.313762799514501	0.478025189330666	0.35199426671504	0.388582366553304	0.42467709162884	0.44961336399234	0.342048512149194	0.336973308350921	0.346465282341848	0.407429006877409	0.306108135252044	0.443874710430392	0.337316991001553	0.527838507358851	0.447492309938864	0.436407027590342	0.387539291806015	0.399391867325606	0.568899591928826	0.386748981419404	0.450153313654867	0.492572167194158	0.33531648849739	0.39629461321154	0.399228445833134	0.390817699587377	0.418385523887895	0.448423684887611	0.419980127603562	0.401335438133427	0.369010753023611	0.470520845693383	0.386964017681657	0.240168816604096	0.252204135670095	0.262241507050363	0.558397430065681	0.392811634767608	0.465621495583501	0.401833282492969	0.37019714845996	0.235927518894076	0.446880782081456	0.430984515151473	0.461056369083744	0.458311707374476	0.453121105482527
M2008_12_CD	0.422565064910307	0.296554909846872	0.331709760997178	0.477433059470339	0.356488257141275	0.341454764521492	0.329927628372076	0.259069092585513	0.333553301154848	0.310163872101588	0.341718212927114	0.390159331674797	0.32258504464055	0.419019137699835	0.3635123453546	0.518193269171355	0.372137953478299	0.45180876747936	0.367006813243692	0.367517699121324	0.469424259916739	0.31966576856991	0.387956524443188	0.378641120985492	0.446272603340112	0.427257161778861	0.352015775458423	0.318095955803336	0.376395182622944	0.394454153265261	0.375694042288108	0.352610595256415	0.143399643153558	0.514459569747625	0.455705060648847	0.294584781028634	0.262161801373212	0.255654305329681	0.596136171287606	0.302399301498101	0.415815607614531	0.276530535390924	0.310045670655161	0.227988633825768	0.295235515598504	0.417949933328813	0.432282459895439	0.483710557068076	0.603340965392938
M2008_13_CD	0.436129392767509	0.255631751741791	0.31021587651135	0.495231737929453	0.323549540318134	0.390798972329211	0.278373764315408	0.240520911700931	0.202695762601537	0.225890386573826	0.256441979303823	0.335401777193807	0.221050111500768	0.249750187586105	0.230163412335355	0.469593088431589	0.428746584974691	0.467392137211941	0.380455444138379	0.357739170312619	0.533224023147037	0.423709370589083	0.478549502783746	0.424559574519998	0.34107728782809	0.39143847125078	0.379946340792287	0.316338406708809	0.356517563353433	0.453197869295172	0.479478568388012	0.432698449360391	0.329949101599104	0.587959001315091	0.440640859522838	0.20131203006904	0.252885099695857	0.271229992461075	0.618830645786619	0.421937754748522	0.434652018569877	0.435871015990128	0.437508215174932	0.191013409593247	0.243873333180905	0.494423525298394	0.523368061807939	0.626983424321464	0.573274912583799
M2008_14_CD	0.432918301095451	0.288644167428348	0.25304944600598	0.491663979611696	0.401597555029816	0.378994251258286	0.257563796696092	0.240621184405843	0.316716499026726	0.275591071219327	0.340037518418232	0.30907087522973	0.197974220018683	0.314822842523756	0.227501245375158	0.492835585928477	0.386256002479801	0.479091655709761	0.369777271898497	0.42998599245634	0.518950231288464	0.331314702102968	0.440839455443122	0.43505969625758	0.353229717037066	0.452635100737126	0.374401202463847	0.337369483099293	0.414682162264977	0.444211510035565	0.429076384036393	0.376306051846572	0.225383021067234	0.570815964127101	0.424357979194791	0.228579432575958	0.219653607788986	0.289518748757096	0.607610556541395	0.370392324537956	0.461598695525313	0.374837442927519	0.413267115562685	0.193177071172617	0.270704478758405	0.471592552757328	0.516327217217363	0.550441833300233	0.597870064611804
M2008_16_CD	0.38892537566024	0.346212397832063	0.234123108292996	0.524062117900158	0.308313064546461	0.355645731849251	0.312170811093913	0.263318027311977	0.148436524022528	0.220529765605659	0.256173583527651	0.287527773141523	0.128308596815714	0.271576961058453	0.173971206376375	0.425526254185803	0.386564110613618	0.408348946638754	0.424343242270754	0.468272817143178	0.5460555785185	0.412971916749012	0.456315273787506	0.421118901712355	0.304400761186688	0.43815556109424	0.372939560733717	0.368549588360493	0.402686237647329	0.416340381009698	0.481610275815588	0.459994227700288	0.347204484669406	0.69923391036186	0.460815828956139	0.152533096265238	0.262321138422604	0.217638539555053	0.666291270633144	0.399603192932717	0.517873540814201	0.454853742268714	0.47103522167418	0.213596792529427	0.248639255968063	0.475347701576218	0.49921474935749	0.5876343178316	0.688416370862459
M2008_8_CD	0.490883039652098	0.284489197544705	0.382438310188983	0.496223382016256	0.370058670424496	0.466699439395756	0.296604001767171	0.347960321237387	0.264076792750891	0.343103864517584	0.369071220111583	0.327498132360499	0.262693337477716	0.336393521523087	0.196303748754911	0.491548380842152	0.419032570599903	0.4560477625776	0.414268737233112	0.391406550884564	0.480836707112746	0.396168540568056	0.440964685068445	0.435215050554507	0.348281757046777	0.391515345742104	0.350629451625698	0.291104376735817	0.387861751530731	0.418596195376763	0.500518758777538	0.476259147846406	0.248029067982063	0.508763555450528	0.407682361667074	0.208102819853952	0.229544156410022	0.251500368869553	0.59195000532041	0.420000886407068	0.400496862733699	0.450617874076635	0.45671728483763	0.249025640428872	0.468209736616787	0.554996979060572	0.538130980199257	0.613217175913566	0.51896047056202
M2014_10_CD	0.322537620917444	0.275232150221073	0.176214155440923	0.283227396994301	0.244811591491579	0.305523618370281	0.245796605834699	0.288984931655101	0.243587886097819	0.268545243901861	0.33898797624404	0.362086879391913	0.250663206251344	0.325075299816984	0.202529667532625	0.423488580377842	0.378486703170424	0.422932686834876	0.388155732593495	0.431944612286514	0.290046668704421	0.257303811408562	0.321438643314738	0.302723841387621	0.294650552763349	0.292867284282451	0.352450764158992	0.336959276285194	0.297043018148349	0.39878166232699	0.389113250783024	0.402687056941696	0.462416362934816	0.336484555042974	0.313176883243337	0.344918230438735	0.255517107967161	0.342734560163129	0.410124961059307	0.481250717588817	0.47199279929103	0.513421264191836	0.489739292452612	0.370213224067525	0.322826590432714	0.43486110828409	0.396575125078232	0.422468863227295	0.345189728145828
M2014_11_CD	0.433302106258631	0.352741033004425	0.280489634621464	0.39118832738269	0.314578404335007	0.386281833658467	0.28075713241762	0.397229547155834	0.310032085043276	0.198404400241383	0.308047948597869	0.312587301814729	0.226319368345202	0.369455237798891	0.269192894409049	0.372401110593296	0.319440312321261	0.458461087399279	0.389547924636851	0.479166106891942	0.383612444418643	0.25864302051714	0.355632305470395	0.373634377339802	0.340872637815343	0.328723902890266	0.345221612068573	0.245313003890293	0.289761324741865	0.396083848258836	0.429583740252811	0.41963014296775	0.411753004987865	0.314391768091784	0.30337556983414	0.340204924211674	0.241257202480907	0.329847650052256	0.432220736607381	0.490014730619636	0.431875318819126	0.506033449113715	0.510444622849511	0.334062759478838	0.398556770204767	0.439976904331476	0.415215153707541	0.454871927958081	0.372649041971791
M2014_12_CD	0.269535796385517	0.30635036830068	0.102319587036671	0.261804855424964	0.223000401024753	0.279185955771867	0.220379017261692	0.287634942757287	0.121288860620102	0.131803533032025	0.260267287727266	0.267063601787099	0.112415704066295	0.171799243045434	0.106696265813073	0.253036061344495	0.308917509824946	0.37555916374332	0.363656304648191	0.346267364345187	0.332491509377131	0.270723669802112	0.268564845300374	0.262213196171711	0.206408246459948	0.254903887569134	0.402457284783156	0.324215979763992	0.248658159772571	0.344730196363074	0.415380732667079	0.438887045213526	0.222103491905448	0.215902316601937	0.295119660104591	0.243399245220405	0.220595278887284	0.237539029681174	0.364163536331188	0.414924096410361	0.423197457385867	0.46441154855739	0.401269020391843	0.458620159105574	0.245211492208946	0.342210155021462	0.396852586594963	0.433436766699209	0.371681886573665
M2014_3_CD	0.380335650185723	0.224293779605544	0.363123962975241	0.253792630826718	0.344695492871069	0.331350194008221	0.343463333106334	0.3444615430692	0.260213427145407	0.183143253856531	0.126101756854721	0.0944946916943842	0.217755127613895	0.166815035521048	-0.128638671904307	0.121887589173237	0.340513572410827	0.350548137790379	0.163408780876048	0.203610781438683	0.393459693341762	0.312318976236703	0.2342221107991	0.256071034771982	0.277943120922748	0.244266172558592	0.371476273289779	0.305796219332039	0.252459062763699	0.196250008918581	0.266032408870559	0.303553452988605	0.407291588922966	0.23023810051935	0.353064378695336	0.352626405437362	0.305249927524709	0.312686512896349	0.245478565238126	0.256634677329593	0.310237517420749	0.374459647276986	0.263056538633718	0.482877393353402	0.307676757434458	0.285851947065243	0.338100574067754	0.238708794423346	0.246015128942226
M2014_5_CD	0.358747215897544	0.320949944725637	0.305181063346922	0.243344846353425	0.402927950889671	0.362402265696853	0.380269739823698	0.395765291113126	0.213278060586972	0.184614053438055	0.310850158616314	0.317908466242702	0.292936477264899	0.282827055440515	0.149863072500834	0.314650105423227	0.254205186821876	0.273477883356173	0.200137300856402	0.160058787787941	0.289741769851903	0.372438922180447	0.32137215146923	0.34324106234326	0.298639513272808	0.174169052991558	0.326675568990568	0.249339960035077	0.22621759920171	0.246585398975619	0.25303904988662	0.334675997289497	0.541098559092794	0.2586230270476	0.261864630467429	0.298738644053881	0.346935845969176	0.354554273354191	0.235794196837611	0.263917741945194	0.337760743590611	0.404072691116839	0.297947196879364	0.433160196096029	0.296724216407022	0.370056017116597	0.410895117956526	0.333430441857415	0.340377130075526
M2014_6_CD	0.401610092990025	0.312936178294485	0.36423225123616	0.289301862348741	0.342140982165354	0.354906875010003	0.309545873022464	0.461974251538744	0.230709329320928	0.321400191672177	0.335429569364273	0.29505638608601	0.234319668931418	0.374834184045373	0.183618241907795	0.399980767646937	0.325615525535549	0.338081200237448	0.247834798621786	0.296619337742409	0.268811664652892	0.275982142712308	0.346154172578299	0.263491875923633	0.213807650868221	0.229995563450985	0.356610671618987	0.24444146551108	0.270329474996949	0.188493889003938	0.289156636489655	0.376719502361767	0.349154041836708	0.135805567949806	0.300952026625039	0.302503213115975	0.259502770690436	0.283145194347611	0.369788085541829	0.347575381522653	0.388857290025485	0.421436434215923	0.305719752148298	0.495937220360575	0.217009525455091	0.364976068713673	0.410507865601308	0.305557654126732	0.392436050180119
M2014_7_CD	0.379278356620749	0.330448981250987	0.376650858760669	0.255559718316607	0.537000582977312	0.290110384973797	0.234288659212601	0.402295246652857	0.455917824901991	0.493630779458901	0.341398158240458	0.355951467933923	0.144626424206208	0.439474717129339	0.468753020886875	0.213415704181432	0.363483166910187	0.554947843311085	0.203041181257703	0.435180595582704	0.370486213388363	0.31986026323416	0.398591491566499	0.319529796889916	0.24389775161106	0.374311699899375	0.39590391015847	0.4535965523769	0.359251536212278	0.226640152642393	0.349759509375925	0.410289745290372	0.122988110684692	0.160820095198677	0.371950891976579	0.324200235261553	0.369705553819945	0.295609904022851	0.343113515871818	0.378816324699204	0.395698207247718	0.411478681744947	0.334487407555668	0.559887134663161	0.213154015427022	0.454536183307433	0.516754708257551	0.40053257592027	0.425354933728548
M2014_8_CD	0.38394828792758	0.294949800260652	0.331925697020824	0.406124915110671	0.466495311242052	0.410991232069572	0.362725994322981	0.397820284241429	0.349462583026457	0.293128632741036	0.339339442570542	0.379630994065345	0.25797402392243	0.371215670357964	0.243084048528901	0.409170010698315	0.354783587877404	0.482604291515853	0.296572449908925	0.330696704728521	0.319698159703136	0.318093471384781	0.278982021729277	0.290683108318318	0.279375204278288	0.265425751606435	0.381000291625055	0.296155781788053	0.25752083594278	0.350495478482669	0.431528585472837	0.449334907881322	0.254725957704263	0.139016924424174	0.27801239159655	0.310117129488949	0.263304645664584	0.346867009097208	0.388815192395617	0.433516093177167	0.42121434795346	0.500342655737688	0.409307299365485	0.460653132541636	0.316604521025699	0.386952948439616	0.451291991577644	0.458894318094069	0.397550221385478
M2014_9_CD	0.388480783178909	0.309825137164546	0.292427320844644	0.419020614769193	0.37371104173909	0.376076636373573	0.341180993548605	0.37180151261417	0.304017942663897	0.326918552750812	0.442529082800576	0.477251171629072	0.359909923180821	0.414306927586524	0.344588242697108	0.46951892493352	0.332762479202278	0.437822220335253	0.396120002117752	0.47211450904186	0.40467213030357	0.432486619153086	0.360187126994784	0.375737954437766	0.265773184456864	0.339841342452914	0.390444717756514	0.299399117752421	0.270522070489727	0.377470009381234	0.459244458074951	0.503310573987404	0.500999405900003	0.377689246258509	0.402556352890003	0.338546522815788	0.271167599856866	0.352228523627482	0.470329473362262	0.468236348223122	0.546766408948882	0.536350697257575	0.516079325905271	0.46072424792209	0.370883959112624	0.485091304659141	0.492854641080707	0.476413947464153	0.45318287952387
M2021_1_CD	0.441745735077318	0.330914372344482	0.293436066725022	0.35804141281991	0.38752205447984	0.457547147674279	0.372504712772036	0.452152929470009	0.309461110929462	0.320047244919648	0.354770961639963	0.350632515499416	0.307915069414204	0.331094717109144	0.17871012713565	0.354277810513978	0.374780032207221	0.363812404624113	0.42910332856258	0.377096396069372	0.403328007824997	0.443089696982704	0.328839490511219	0.33529982952171	0.34335009005746	0.310710706749249	0.385632983191108	0.352752237748227	0.340847859240612	0.382079413460616	0.468725441151813	0.407163068437316	0.33266625003106	0.293152525067267	0.453503609205884	0.207283074838392	0.154862882020407	0.250784298942457	0.48454108621644	0.408409293323656	0.482667921335706	0.434912791762645	0.427681185053269	0.414018876921135	0.464716296886899	0.417147289756564	0.417161140222968	0.444998413451184	0.471603339224697
M2021_2_CD	0.365898462810801	0.296268213170546	0.225314517508374	0.34505720173055	0.328866052828639	0.374799832012057	0.249639043882689	0.246396745069181	0.245775138191564	0.431069975162679	0.369120566201057	0.401830842555414	0.291347350570316	0.413037518579318	0.312595503102036	0.500721983349177	0.411380450563301	0.379172461291509	0.398331158445038	0.450808399520785	0.384724328662278	0.358726531704631	0.388228272583926	0.326985448005221	0.325642435797916	0.365556809043796	0.439524798707322	0.384376640063413	0.351933665048567	0.496989585420096	0.458144936457872	0.447751401854335	0.154218769741023	0.352969838691677	0.419757604524096	0.236667232932266	0.232218141828977	0.308585877272345	0.493212439213349	0.343406383218647	0.472263170331248	0.377769861620795	0.501694792107222	0.30502641901272	0.413636234721929	0.457043825812979	0.410202058366669	0.447533637744815	0.341880609549652
M2021_3_CD	0.430624971859237	0.320629284442755	0.258366255702637	0.328365340583967	0.299041317822108	0.408784346773009	0.328831105524384	0.213280566815638	0.323770841529014	0.293878055639984	0.310481666813936	0.268105484400418	0.273847162494057	0.372878482445188	0.311426068760833	0.391989050262293	0.304704613543665	0.360560259809731	0.331364388458079	0.300729931839824	0.404918799470067	0.270097481945139	0.310092171715217	0.316798133985205	0.432337288862571	0.381940170777193	0.427442911221865	0.342637913916651	0.325862078680173	0.440175510954359	0.411993018121939	0.422475465321765	0.289903850061038	0.311514531538709	0.439494328352252	0.267563213878351	0.164004340687129	0.267675601326529	0.41772289413986	0.377745990727853	0.391084913953219	0.449420579808976	0.443797103315296	0.327060590590711	0.356805506919546	0.352193633903463	0.325442840578301	0.309355363288903	0.385303535701149
M2021_5_CD	0.491165877826665	0.374865962880589	0.403862099630453	0.382555226908073	0.400462838244533	0.423554578122044	0.343018889058842	0.418312541194916	0.427258790043972	0.36740658663653	0.381945866818779	0.396933396714021	0.321743776844407	0.420836204606775	0.404102357901838	0.40763344012983	0.450592378099422	0.414217736531911	0.391231970968382	0.450320268606122	0.425995150724142	0.325852921360512	0.328409502279756	0.337661911580207	0.42123866537453	0.385419192226102	0.393277574100591	0.347582823082872	0.314687815346238	0.423064675969773	0.387048173511911	0.322677217289503	0.247283147475708	0.280200296294276	0.405392478312879	0.220621273911584	0.2138343323703	0.273270503607199	0.447759580471784	0.382637125840274	0.448600199983239	0.389148174465294	0.398384853753184	0.315714735581562	0.436133594246089	0.351832227567665	0.400946302055803	0.37093826707243	0.343415371310682
M2021_6_CD	0.475702254663291	0.378545566951029	0.275144308571698	0.408002139708639	0.404960889628245	0.400915581496367	0.44595415321643	0.404829287277983	0.322008428111988	0.475123983080355	0.45402052754859	0.462985355307178	0.37115297834237	0.471926412150019	0.340945828611865	0.448769483438175	0.434978121940336	0.492991623109157	0.444147568810389	0.472446148352823	0.471645323174125	0.327121753062316	0.399033220388159	0.403087218004764	0.347899847019638	0.384205328881696	0.379808354084452	0.352386438727795	0.407752789366097	0.4650158128862	0.462307452070654	0.446486429511004	0.252816523864045	0.274313088236767	0.366595597990614	0.247167089074405	0.270742850714901	0.341528293398869	0.518754492016947	0.445936858565374	0.428028851758355	0.480757218671195	0.466713673109715	0.292024501236488	0.364075457461195	0.420338855927683	0.428300191650949	0.386521546191913	0.420384792328877
M2024_1_UC	0.343191909842423	0.209129249945562	0.255230370036182	0.54263307060922	0.125684820166034	0.318455363324184	0.346528174529403	0.213140675179231	0.200101638861867	0.154065684580937	0.286034736524734	0.280581113959556	0.207396031488121	0.339887015947923	0.126324624270988	0.516596502292136	0.388247186957928	0.388801551564228	0.392832433544787	0.413936901762716	0.584891062613743	0.448332362526538	0.448527972107035	0.483636060676209	0.358268512824937	0.444149086601738	0.27641329805583	0.40458274805061	0.389329203922816	0.396593370013722	0.415970520963917	0.435226745732773	0.348070303261119	0.672085372087428	0.418165881194021	0.18695927153725	0.166960662353378	0.256437575722911	0.67122852302143	0.304553729756848	0.425890172134512	0.401307499802012	0.320164026812841	0.126741688728216	0.484539867768643	0.523465000329802	0.567636186778422	0.586804652158265	0.717336930517789
M2025_1_CD	0.427362343347728	0.160783795260462	0.348500887798907	0.298783125516473	0.28929439857028	0.357045465768994	0.322070669111889	0.217356344682751	0.252402881279571	0.237003746075847	0.345953889649021	0.227425292177313	0.1995306142648	0.285817198462662	0.148457360835802	0.392883731387049	0.335461040137559	0.354565909574828	0.364738848479631	0.358737395577223	0.283334402046018	0.292483044024808	0.245368356368504	0.243314066155037	0.336277484084312	0.311636731820616	0.355710725585088	0.355865040707315	0.321801338547501	0.397394219357573	0.421364397331803	0.448630310348558	0.203349373981883	0.317727235034198	0.426482334796562	0.217517174012231	0.266478670494765	0.344113116102	0.482793352101355	0.402902079180237	0.36988809273895	0.448921793669435	0.410710996165814	0.296316025639719	0.381727860979991	0.418414418630433	0.469191523112759	0.474717974242499	0.398612571053241
M2025_3_CD	0.40582844276259	0.311342849633906	0.280111977509408	0.352739408711181	0.363560679850379	0.444167857362278	0.344858008150961	0.230085210706798	0.276402867002206	0.165219795359799	0.300254349694964	0.179720952372531	0.189500302702659	0.270461668906225	0.16118670033644	0.373353207490097	0.450780251225375	0.419125630144617	0.448389528951723	0.426502849595914	0.393527114130047	0.369589943911531	0.356626037904592	0.343202391126211	0.361306290194358	0.376956439052728	0.352171287861652	0.369552966459296	0.340696390141949	0.484853298296916	0.520547829746605	0.486956240165516	0.253431834326525	0.415911481901241	0.39614499800545	0.316508255832445	0.307036594414465	0.390624334987025	0.539830828500712	0.427112879601107	0.451895499235048	0.42794529024946	0.499515804744309	0.281084677383548	0.507066948964016	0.436149841532416	0.445550826463342	0.464088878271435	0.429398159278369
M2025_4_CD	0.328071561227234	0.355258182396023	0.206840595788593	0.337329568199841	0.316700261243595	0.343330780866697	0.317288902923616	0.238556625282812	0.313825631626937	0.226418219380418	0.355724717034044	0.26646089472538	0.290013809133817	0.378845254462563	0.317374731430842	0.372866793853051	0.412992062634548	0.429285736581152	0.457915047179352	0.481702305828922	0.350740177389531	0.250408444384598	0.333670883460768	0.328986671371987	0.393899025320886	0.389021347168426	0.360069558926685	0.365108733285592	0.320159459237982	0.412580937389612	0.420637268765022	0.42547656019888	0.282540604272478	0.306376320935335	0.45748320476102	0.360874420450115	0.35475915707722	0.451938215831596	0.450008884988794	0.368172383979905	0.472133432710841	0.397796743956811	0.427952383892578	0.311558651545436	0.486967681471921	0.322386379090765	0.389935118872609	0.35546486585218	0.416771779399259
M2025_7_CD	0.346997131097105	0.238000384533636	0.229139971327606	0.334134941407664	0.405789091928233	0.387825373369759	0.323678665465338	0.236661479977269	0.349648370831437	0.230682251787227	0.29072724812931	0.299677650224366	0.258461788117641	0.303577347586847	0.175646111885339	0.301547053668498	0.427881318055874	0.487309932196744	0.418474523674059	0.431102949122159	0.368071069444896	0.327354413747554	0.367534749868461	0.293204132374021	0.318104482804976	0.356130099105372	0.335874564857044	0.329148307520375	0.304173162800951	0.421560668327525	0.504879858822506	0.516043555052365	0.262888905982265	0.234682153917371	0.455947690097176	0.328322174956376	0.320474921796063	0.400922278946959	0.462662669219197	0.427272638414173	0.394930501410908	0.457855237466849	0.432558509291044	0.311526692006197	0.297926229761167	0.492630780002099	0.424251133860225	0.452046696375744	0.394260220892933
M2026_1_UC	0.455508802958872	0.0871725413212815	0.365378419103572	0.61823269835865	-0.319610605275079	0.131476204960158	0.167327464603711	0.138352350891333	0.235206801367318	-0.242858180129484	0.218384024363333	0.272441754550527	0.145634911006712	0.182668634956413	0.27594175698291	0.60627644008887	0.15952656672409	0.0667484721282148	0.198780862112079	0.245492893903634	0.0403748003606601	0.14968108566313	0.094260308624272	0.199224560363642	0.259815799078062	0.0545070439900316	-0.379478396260932	-0.230902191051437	-0.0456945816229802	0.274484980195275	0.260249356488557	0.279458377146342	0.0493763041177449	0.775164418937285	-0.0163628053025618	0.204541198510806	0.347778306614067	0.305235862048753	0.643081899787681	0.134744576028238	0.161779323829488	0.150208320302977	0.26235067023699	-0.316425696349734	0.303538021169071	0.525573107330027	0.622053158700198	0.653489577911248	0.834685195291903
M2026_2_UC	0.431528370369487	0.159524868735866	0.354164788548269	0.65722269684505	-0.121950792387391	0.314584756820192	0.142213609255734	0.383187023435401	0.259306552869895	0.0573817215254287	0.236985333956285	0.383961229626215	0.0613777610355556	0.255760355057757	0.271651046637766	0.617468956344559	0.540807545682339	0.388668429345354	0.461524862357549	0.33799981921621	0.366728975118984	0.383630714099712	0.252191355938372	0.369560168373576	0.180673532734814	0.216322906465719	0.0496908908720895	0.106897606041525	0.090568414172762	0.302511506191984	0.220206864739654	0.296132846780574	0.518290322142856	0.771383733882787	0.653459659953106	0.0371173880146738	0.118914910742554	0.388832724351642	0.719307547069772	0.273845531710713	0.524501799049339	0.37482882039671	0.226007950925681	-0.193294259732439	0.278400807652511	0.565849315386501	0.629044279275307	0.672018204403039	0.80456861384785
M2026_3_UC	0.40115094172284	0.115764931867026	0.217699888337721	0.664630083468899	0.252194097817196	0.393632899879873	0.168482273002891	0.465715729917551	0.295626413959548	0.309072003667698	0.320792997569859	0.466262051311511	0.200356216631192	0.314803975083182	0.447091889591124	0.572782860337752	0.424458836600211	0.412920514382788	0.486618659622804	0.445737728189607	0.555224808193931	0.484593951284964	0.47761007013135	0.425524070594582	0.237223221058301	0.328640197240259	0.195135007723198	0.19870050372374	0.255157144147287	0.255333113373312	0.273640692998929	0.279053397907781	0.349009776365575	0.775985069527508	0.569262141415431	0.104798538476672	0.341698127674342	0.27741616121876	0.738569910427892	0.436451747430403	0.482555913636019	0.386511568122802	0.36979925032196	0.0629045250315044	0.0842112778098267	0.520203399549102	0.573058482084123	0.635316689295438	0.800514792354046
M2026_4_UC	0.439538734265758	0.263826386434194	0.287865387611988	0.55241531480856	0.289952712824922	0.489029436142033	0.229356783319962	0.315122859754549	0.277159148432307	0.30461859417765	0.403780973473794	0.408834155551329	0.219209466536027	0.462860663522345	0.361761481099841	0.603624976810015	0.441612996999864	0.387929992769785	0.39191560873083	0.464640898581275	0.457423069894805	0.48732860004779	0.471535396475076	0.442870280962623	0.288703896489716	0.368885332687574	0.320745956270559	0.36355278598551	0.378379362327779	0.339125086885127	0.42499002409994	0.39978193551152	0.408549642346499	0.637328071339848	0.427092186829755	0.18807499521153	0.159185742608144	0.278838478761155	0.697810750328309	0.432452259810728	0.546221278171174	0.546964355542282	0.498844829284205	0.336335137245356	0.452805093903509	0.557033132261547	0.593459903869911	0.57938011639118	0.639757048657343
M2026_7_UC	0.359284120177963	0.33799630833921	0.240905824735756	0.53199566370615	0.273667387005432	0.321102288778911	0.330753814049574	0.334853106322921	0.160520718496702	0.255008798421987	0.363262684636978	0.343697170205399	0.225617304094437	0.313208624934275	0.438163146788844	0.524375108750587	0.353815658243959	0.325521990552927	0.369878848745978	0.414776634581762	0.443439641909608	0.396929850466483	0.404463583183879	0.443081418469461	0.308186271108896	0.288707894592332	0.273795206792328	0.250249726613929	0.331569434877778	0.262262396691125	0.296210212036986	0.222829863782985	0.259132135616693	0.700379723916082	0.389746526494452	0.0344405743064481	0.0555398482820181	0.157801495360405	0.627604114313232	0.377447450940185	0.478003014825889	0.495782427908508	0.387782566275006	0.223109452905434	0.489379645206775	0.382170146766972	0.462945358484298	0.523919013367505	0.730524532214882
M2027_1_CD	0.356800874993165	0.354429621294013	0.226979488475296	0.398698389002271	0.209435606510077	0.328904476127273	0.351318924380405	0.357084759160373	0.210860621029941	0.215883242160267	0.364162298353154	0.384211955466501	0.392143382720833	0.407621935288352	0.201006976887752	0.362337631277576	0.415790444448089	0.380815760024637	0.287148970562288	0.448421785617928	0.39811271124607	0.374988694991677	0.289917111346558	0.342156927584435	0.228439944524812	0.2794207688006	0.247738905263966	0.257710181092467	0.328560258354717	0.317108076187501	0.305121295231332	0.34077390602997	0.45821358446763	0.256799527390055	0.249042890839045	0.219183147885104	0.116001216176008	0.277387686287046	0.450499790514847	0.296531308196323	0.409940491836267	0.392571386612164	0.413198946778133	0.273471726873525	0.411489928253879	0.348222127116978	0.348728422992562	0.356445412193531	0.442497931211843
M2027_2_CD	0.39716547242879	0.335522661996167	0.249010366540542	0.340357114602844	0.312618324851812	0.348700749412661	0.312574551157845	0.371771176563158	0.24923096384183	0.247307939236809	0.386381992229006	0.335708436724284	0.286018488861107	0.38170537206459	0.258805853900745	0.424385117896482	0.410361048803309	0.422632162970821	0.383316343728946	0.392373188435534	0.427534113855868	0.33462534612253	0.317166228264898	0.301994232825026	0.230760560614811	0.320138422399617	0.33860589120711	0.31707152166747	0.277403267478783	0.377810423736467	0.384227160996769	0.408088653239828	0.436142516415338	0.3331903772349	0.321901367786545	0.318515666182773	0.304677459117297	0.278757952746256	0.441561084213	0.450666540930909	0.464566244911227	0.456643397288101	0.482371355241945	0.3052759041564	0.33609843599609	0.393124355273327	0.351141155194887	0.384983112308167	0.339531721350548
M2027_3_CD	0.321075365609192	0.285228762091513	0.192334277895631	0.366925222633312	0.312787173032189	0.345091444755222	0.313488884314831	0.380684804632049	0.207781919258988	0.277263516125777	0.337999940012038	0.384178241378106	0.341396033825655	0.353060900379982	0.165717680068811	0.311214564435314	0.392678080066602	0.433037863323363	0.309438147371525	0.448277643766597	0.361413934760813	0.336656876890524	0.335472272887858	0.347358034173836	0.227323695964451	0.331903396916823	0.305320708790381	0.330066287553819	0.346226094976762	0.377556330778437	0.363407376361799	0.397584504412755	0.277880288263264	0.251917252379991	0.304912310792565	0.255645481507949	0.250688203751621	0.279831567069272	0.479952276832001	0.396354955169608	0.442238738419133	0.477117552971949	0.431417594765585	0.298659348739485	0.423454606133511	0.469072760279843	0.354991276405476	0.394636292179734	0.40158641405982
M2027_5_CD	0.339580551834106	0.333588101222966	0.166993050690689	0.283620011788347	0.29158212942484	0.377706144477355	0.299562434375325	0.20896163439307	0.167858664430816	0.136064270383973	0.309092009986919	0.228200192841762	0.206542822858528	0.23570290425285	0.130970089652363	0.210540124523858	0.404670372931683	0.390985087271357	0.300018450249987	0.470655316699027	0.429623555952161	0.437555853900214	0.320038980727938	0.386549437766194	0.272001207604614	0.344409520875304	0.301671598782481	0.288416454776446	0.279183598215015	0.300003071919476	0.301273919629833	0.331830121291137	0.360883387017547	0.349779240558848	0.303844129747539	0.118283021392343	0.123578785722636	0.273107966715556	0.412003463506842	0.346354662161018	0.369732120845117	0.356589397587244	0.423550660949597	0.3154507232144	0.454519990117182	0.392284430746793	0.366838587691916	0.425743562185247	0.454770883746387
M2027_6_CD	0.332343248926159	0.300163476006856	0.0744527489011271	0.221864162273795	0.215694265030926	0.286534629235918	0.284401885097736	0.185205473408251	0.194560144718269	0.14072288138798	0.231059507509756	0.18737222325771	0.226216280121238	0.317780519082619	0.122181791726409	0.242758320898757	0.409746205057996	0.455885834657972	0.370426302928622	0.426786105589629	0.378982352575206	0.361345914689295	0.330271622808178	0.325569278611856	0.260401593785224	0.351746310428325	0.307778580161288	0.325581658822822	0.328865062147187	0.319442191515026	0.320745661676944	0.404414621148788	0.330663659759929	0.285467127756158	0.332394133942698	0.266514762201055	0.239790088209791	0.330092955757971	0.469570157759782	0.390227740453234	0.494325643481459	0.456118897795159	0.452876079936323	0.278178446873321	0.497970419825635	0.352307700864537	0.328437801837604	0.338314097137719	0.389303551843927
M2028_1_CD	0.436335993793118	0.287030568593158	0.275784772104619	0.323763605286895	0.396094873896814	0.44767796573727	0.44922743996714	0.431028087821375	0.371178939716931	0.353467586139925	0.34878626768669	0.353506892616383	0.299651010666225	0.378121727303848	0.187553182089526	0.37530249208989	0.434061422281614	0.454536992619576	0.411563709102059	0.465598323933263	0.46689125331729	0.430395967170869	0.442640091384722	0.443542645550735	0.418124060135345	0.451074240211333	0.415085883106997	0.429466741930223	0.484495613790545	0.480215132164304	0.492059272221174	0.484904620987448	0.359872479851971	0.444363231418396	0.510870096514836	0.328513784218821	0.245920540811409	0.265352007005331	0.485386589857832	0.411666705811079	0.410397951287331	0.445950549529258	0.429568520795469	0.406422111002075	0.455625759658984	0.442304111053595	0.459596716494726	0.476338257790086	0.480903985940635
M2028_2_CD	0.347388358382579	0.344498591248908	0.149014803356876	0.362413997207716	0.282591218778765	0.319518278063431	0.344972427454777	0.3541646952225	0.226601163801993	0.288570441321204	0.368023302461759	0.335509411166684	0.274873135710442	0.443013250075818	0.271951023164591	0.39237917255869	0.387645644689005	0.376356557668011	0.382762676469287	0.417458338676844	0.485301770783503	0.450533506516	0.501820107220954	0.546091923957093	0.4943045790895	0.444484039306166	0.443182616172967	0.454856974393645	0.485236845495591	0.531837636344399	0.462172002003299	0.463337634476445	0.204591098304076	0.387084374201585	0.483555164211714	0.279349138890174	0.264793301188408	0.145597060321952	0.439296686191492	0.340922325176712	0.398904735577249	0.402202816183152	0.379512776149751	0.261273885521249	0.444965259690652	0.347197576698251	0.378680307550814	0.42530327892015	0.408652126313114
M2028_4_CD	0.466837216508212	0.249373745602317	0.400065551817557	0.288961514815262	0.452805172827939	0.352366438865396	0.328961720077585	0.369976252722432	0.425897395604427	0.222711839664044	0.179389354348857	0.289163607446077	0.277417615035236	0.308736484620856	0.251739488737046	0.283337557734235	0.393546004790345	0.405165443082457	0.399043296589263	0.434487554804365	0.406354957840134	0.343058146084692	0.364847608016394	0.428275160971812	0.477387327451591	0.396922107702257	0.358770577031219	0.42144391943399	0.366778859232128	0.38908185267108	0.335060907807281	0.323560121238565	0.17017224155735	0.192092003149105	0.490299118604751	0.244551567758121	0.152138024999006	0.226703795293174	0.410907695962768	0.327894480547529	0.307585055730812	0.336448110631845	0.332705819810841	0.264048288523876	0.240699726045631	0.270073870634957	0.313176074312301	0.33522185383854	0.292223976856023
M2039_1_non	0.400587040699171	0.234353572200561	0.314199128997365	0.321321723945043	0.356336226548231	0.38285115705803	0.390589824532371	0.31065400031855	0.340812577095451	0.320595143572626	0.342862188395138	0.325817855967913	0.225564704234005	0.293813294954422	0.160327419763781	0.340792712014084	0.453773691572149	0.494942332755816	0.483177683509697	0.458665227286511	0.448027400429945	0.354989921352027	0.41926936009106	0.424626219247427	0.384903216055048	0.404198595689401	0.471279249927461	0.385284132161223	0.429565764393775	0.461382171273934	0.474696148625642	0.499149731041856	0.400935163799595	0.320312934983818	0.426510626869293	0.321715967893067	0.322467373305988	0.347816234269636	0.500431352985261	0.501544965659935	0.500508378695789	0.526808885770117	0.489744967579527	0.369300812547068	0.344450695782402	0.443936641331015	0.467467749489039	0.486029128901961	0.41056983344445
[truncated: 98 more columns]
