# Supplementary material for: Understanding Horizontal Gene Transfer network in human gut microbiota
Source: Gut Pathog. 2020 Jul 9;12:33. doi: 10.1186/s13099-020-00370-9 (PMC7346641; doi:10.1186/s13099-020-00370-9)
Supplement: Supplementary file 4 — Additional file 4. Spearman correlation between the clustering coefficient of all nodes in HGT networks in IBD dataset. [file 13099_2020_370_MOESM4_ESM.csv]

	C3001_1_CD	C3001_10_CD	C3001_2_CD	C3001_3_CD	C3001_4_CD	C3001_5_CD	C3001_7_CD	C3001_8_CD	C3001_9_CD	C3002_1_CD	C3002_2_CD	C3002_3_CD	C3002_4_CD	C3002_5_CD	C3002_6_CD	C3002_7_CD	C3003_2_UC	C3003_3_UC	C3003_5_UC	C3003_7_UC	C3004_1_UC	C3004_3_UC	C3004_4_UC	C3004_5_UC	C3004_6_UC	C3005_2_UC	C3005_3_UC	C3005_5_UC	C3005_6_UC	C3006_1_UC	C3006_2_UC	C3006_4_UC	C3007_1_CD	C3007_2_CD	C3007_4_CD	C3008_1_CD	C3008_3_CD	C3008_4_CD	E5001_1_CD	E5001_2_CD	E5001_3_CD	E5001_4_CD	E5001_7_CD	E5001_8_CD	E5001_9_CD	E5002_2_non	E5002_3_non	E5002_4_non	E5002_5_non
C3001_1_CD	1	0.359775487476068	0.475814838876612	0.382924348416332	0.420841624174658	0.202820516229505	0.233221688460944	0.314753361674769	0.241259194828225	0.290657140368049	0.201237208812181	0.115801828580712	0.132347291822462	0.201118611687353	0.233725387091629	0.35207131361169	0.267019362571849	0.082372895554375	0.188591872189376	0.168769539021728	0.162209305676517	0.0798184904176007	0.189072293662946	0.178937585441502	0.301970875356073	0.221139349009449	0.189459837999362	0.143960580098292	0.0943963605473064	0.226648979062388	0.240269355344431	0.178045761262105	0.200396241599407	0.218199168996063	0.150009198838489	0.0688268696299759	0.269034939694919	0.168866528413343	0.329387733622663	0.27791556842142	0.299648629940106	0.144657400364489	0.213965553060481	0.261075793844065	0.14837619239589	0.37095422946606	0.309395204369184	0.265963335157413	0.252491992882132
C3001_10_CD	0.359775487476068	1	0.433926285223901	0.587433850413695	0.463961413723117	0.53115129976047	0.362127769511024	0.455559620609617	0.21236724075604	0.405737688235508	0.295779585616614	0.378700118886632	0.340078701038887	0.394690353478209	0.407880895171772	0.424581582841512	0.269793999885565	0.102918804095649	0.204377301682513	0.154014246710775	0.193554500949374	0.146230976862693	0.256001278882058	0.176569067766052	0.310251867098117	0.112243843371377	0.164828428950224	0.191647504244743	0.251982143400753	0.169710834792975	0.21040019752344	0.151132487150919	0.207806510835385	0.0974752363351715	0.167476463266808	0.235766298017048	0.318752390440583	0.384324288475651	0.200716431454061	0.285774926024776	0.345519336006695	0.0778146942245163	0.223254219569411	0.209078720644248	0.242360097264075	0.200031390242548	0.145059998386	0.0177877686578747	0.173106405029265
C3001_2_CD	0.475814838876612	0.433926285223901	1	0.364367267835923	0.47646541349606	0.282816075987462	0.253410269285289	0.412271962823865	0.326122182569918	0.371867529758153	0.216847048380526	0.277076057046579	0.263002214080643	0.347378198784753	0.426552215728914	0.33040748612044	0.173103854746558	0.0868746168969682	0.115145688230839	0.1059118072512	0.11587045162111	0.188908778084407	0.147799173459861	0.136028142686729	0.277695529473784	0.149273752332516	0.131678465921752	0.100965054197373	0.11053428915138	0.180825047474493	0.208330809577302	0.165764409248191	0.226763366812966	0.204095024971844	0.017523490895619	0.234815502443622	0.263025015021215	0.233723673991303	0.196270016285506	0.266562288588596	0.244927127837097	0.0960105800924867	0.148817319204492	0.200363588442727	0.17420586037296	0.186542514739106	0.236783600504462	0.0989955448743811	0.245617914481951
C3001_3_CD	0.382924348416332	0.587433850413695	0.364367267835923	1	0.430393603863912	0.568604132295396	0.272899577383817	0.452592238069661	0.229638597931866	0.292776240839647	0.226293529727705	0.361387121373065	0.238877639367516	0.40775943121401	0.454125564313815	0.466558138120977	0.244014010846559	0.0524591411374153	0.143745312971538	0.104460872243292	0.260707995801938	0.153717123428398	0.222783473622777	0.219200062629712	0.254834813042862	0.133073111530496	0.017081751060163	0.109335058435763	0.122560750516027	0.0714304165618837	0.21780750849614	0.10186998306443	0.0769420806763463	0.307620845192178	0.0857374722564074	0.116502415962947	0.246541157246382	0.275963236326766	0.485882704318582	0.219821680866188	0.336573544950296	0.0306645119852495	0.0628207451909817	0.122440095295073	0.148782509716768	0.458637329355965	0.345147473898525	0.370574346811058	0.311475950525039
C3001_4_CD	0.420841624174658	0.463961413723117	0.47646541349606	0.430393603863912	1	0.371368243186639	0.144817399858706	0.434270749975836	0.263546778298792	0.344317121217097	0.21277209080662	0.334840897395102	0.386627742650123	0.336432457251814	0.384458043655018	0.359252157324499	0.251319243959513	0.0220964777524301	0.210319846747592	0.177982163845368	0.0849655215291795	0.150365907786872	0.147780069392012	0.112866821733064	0.286129535438969	0.199482344423723	0.165229683682959	0.181354953666061	0.183446206968238	0.147949478845012	0.126730726973099	0.112523688628391	-0.000141902397995984	0.0902583118362122	0.116063108019186	0.155032070787582	0.229541737576471	0.171252694964942	0.130894077587543	0.193853508585885	0.133059428977274	-0.0303646417017003	0.175387700769159	0.165188248311535	0.169658501802009	0.114848030348785	0.136227725418931	-0.00720340176909733	0.0850482513234833
C3001_5_CD	0.202820516229505	0.53115129976047	0.282816075987462	0.568604132295396	0.371368243186639	1	0.218612998119216	0.439473849920697	0.176137599871467	0.178361521303978	0.0499324885678571	0.385564536552758	0.326185376109265	0.36586811288079	0.319411362436372	0.294816001170118	0.238313245173144	0.0454153352286682	0.136318325155342	0.121457174277823	-0.00343580503598868	0.149001352968425	0.0517410592013767	0.106193474151125	0.0887489724108659	0.113864381438453	0.11228283395555	0.144355382924818	0.306091051130332	0.0818260942134931	0.233227945985401	0.146978706567266	-0.113102984371787	-0.0401916545181756	0.225485712820888	0.119382274618477	0.220757485656094	0.350689500949844	0.165429749748908	0.165429796428233	0.164761462225086	0.0227079929462067	0.0890245027908297	0.09461624209948	0.199590725111606	0.230048344448866	0.0605153771759924	0.151129851989257	0.168056688498589
C3001_7_CD	0.233221688460944	0.362127769511024	0.253410269285289	0.272899577383817	0.144817399858706	0.218612998119216	1	0.350861964666885	0.1732399102449	0.189122586178616	0.162005006609874	0.111263823426863	0.109820804368179	0.143896419542066	0.170441992361073	0.13583728062736	0.0930901961319436	0.0965056331249246	0.156114088265165	0.147737715574306	0.227909214474401	0.225999949099938	0.252375057906627	0.165100118097888	0.21611979254516	0.0679148329815968	0.000466420972237568	0.150418297912906	0.123374549797078	0.236601548045255	0.246121159595275	0.237203553296651	0.232514460318008	0.159045358718702	0.00833156341794085	0.130937745917106	0.144755916210056	0.297850346939664	0.155224705220826	0.14903682120427	0.187832028149202	0.0637146128893356	0.177197550535862	0.191403252889762	0.0594395080060505	0.18102674301205	0.191614642521034	0.0587877134240232	0.160802425865266
C3001_8_CD	0.314753361674769	0.455559620609617	0.412271962823865	0.452592238069661	0.434270749975836	0.439473849920697	0.350861964666885	1	0.232878366686469	0.309587687652606	0.191884870332026	0.272346571314068	0.365729524251019	0.293605482947873	0.284482815662937	0.231322452295	0.165621287224907	0.0983958828196734	0.0851062790535558	0.0994509269065421	0.0530075005912887	0.116456273472024	0.164250265939455	0.209234072141739	0.237340290168744	0.0458799835562909	0.114387484951541	0.215903097810415	0.190094368228191	0.100937748881376	0.110933418417364	0.0625975659119645	0.0887937174060476	-0.0558790502887931	0.0222935012921001	0.199116486247714	0.305686220231484	0.243814969792668	0.0857710817317474	0.181462466213517	0.101373036927273	0.095201922561696	0.15927960434811	0.244686450256013	0.182402106176954	0.21364384068299	0.156034335891447	0.100831893796603	0.127024779111126
C3001_9_CD	0.241259194828225	0.21236724075604	0.326122182569918	0.229638597931866	0.263546778298792	0.176137599871467	0.1732399102449	0.232878366686469	1	0.29923759072567	0.265757400000092	0.284820977662341	0.249644665739336	0.279097400131516	0.269187286930935	0.246261524712912	0.0938865987811106	0.0576707571396595	0.110299404791276	-0.0155586348662106	0.254923512426524	0.190276122121271	0.161556825687214	0.169048876892923	0.28790747832412	0.183695674157098	0.156708787767288	0.164139317610583	0.162284215824778	0.178039547430918	0.164057305437363	0.122803061824011	0.279835947683103	0.29834305215144	0.0984532448304205	0.161544416602837	0.28003419547865	0.186516580338203	0.0821199906277599	0.268868380738458	0.196059817749736	0.0757934776257373	0.159752184390185	0.153824294497948	0.0896497431008921	0.155889979414633	0.0895838029531003	0.0405189588745869	0.0670466133571139
C3002_1_CD	0.290657140368049	0.405737688235508	0.371867529758153	0.292776240839647	0.344317121217097	0.178361521303978	0.189122586178616	0.309587687652606	0.29923759072567	1	0.515217862204064	0.476636563599958	0.341869526652048	0.513422211448336	0.517558661701853	0.53104137659475	0.0727420647492526	0.0329388609815861	0.145982532761208	0.0871294076079923	0.185115682870908	0.269331146303249	0.263953044377779	0.118988765879694	0.277942185921744	0.204604278083969	0.104106593201604	0.076830063058864	0.18372389316777	0.165841834243293	0.23906605047001	0.219077908715885	0.253315721729478	0.115242098997667	-0.00607853506647514	0.274075317655395	0.256528184087257	0.169786357176614	0.117920552951748	0.397217719299769	0.328768803497253	0.233602294761756	0.300476289012329	0.293660137110753	0.205342377733733	0.164499616052268	0.148994958524503	-0.202983061440772	0.0235540646162552
C3002_2_CD	0.201237208812181	0.295779585616614	0.216847048380526	0.226293529727705	0.21277209080662	0.0499324885678571	0.162005006609874	0.191884870332026	0.265757400000092	0.515217862204064	1	0.475754811782495	0.383004619332768	0.451630084980024	0.551907748464553	0.465151774521189	0.00261618941252876	0.0615521194524316	0.0972784332769021	-0.0157589363917358	0.209778244397753	0.290307464994929	0.266148744691857	0.302461321738761	0.361962436891602	0.160690415864776	0.0609859809047613	0.0517240447745108	0.129558190383661	0.244310762050383	0.189420338740472	0.168385906753713	0.294633277532074	0.112679726170705	0.109062880977067	0.195737755707915	0.209548644471843	0.204237359738715	0.0719124320431164	0.301232702730506	0.340524697183044	0.222333863337074	0.348422864731312	0.328745944354669	0.1446936784803	0.133169522578774	0.264512281723746	-0.11227895330693	-0.0139815077584318
C3002_3_CD	0.115801828580712	0.378700118886632	0.277076057046579	0.361387121373065	0.334840897395102	0.385564536552758	0.111263823426863	0.272346571314068	0.284820977662341	0.476636563599958	0.475754811782495	1	0.318646541608732	0.533006505890602	0.426439290724	0.553800845617602	0.198146991674317	0.0960936374828951	0.138486751178037	0.0425036269602106	0.217242104746464	0.317163151498509	0.23864036622474	0.200302603650003	0.284828824912121	0.155038943334777	0.191385055328493	0.110077602960577	0.142817063140612	0.161254955286765	0.243934667855359	0.192291085989148	0.223893986050109	0.149665692843765	-0.0358181533821609	0.240422027611597	0.291128250835488	0.21443773077354	0.0758337081320257	0.223242183835726	0.275188404888283	0.181645099194108	0.216517804047252	0.227528794909653	0.0569413788839273	0.266107667788675	0.144716769243116	-0.0202155190103595	0.100468578651152
C3002_4_CD	0.132347291822462	0.340078701038887	0.263002214080643	0.238877639367516	0.386627742650123	0.326185376109265	0.109820804368179	0.365729524251019	0.249644665739336	0.341869526652048	0.383004619332768	0.318646541608732	1	0.317408009355926	0.448976759280735	0.303557772575564	0.164564539556078	0.165783596636122	0.174663254209208	0.128136533350256	0.166035427254184	0.166826702877215	0.22828092902686	0.222784620014264	0.263208332940022	0.257380929503471	0.215112018715875	0.172917671412172	0.198397637256921	0.120457500982038	0.141919813995325	0.135828623327167	0.203381159494235	0.0458698885011376	0.108436714482761	0.146718732034968	0.22777725687149	0.182364048293129	-0.0724197805991341	0.233477741959869	0.226644186216142	0.159833153630917	0.212870504554243	0.226480452883008	0.138826770882238	0.0776349258936103	0.0824048384673598	-0.111199476027022	-0.0239578281105741
C3002_5_CD	0.201118611687353	0.394690353478209	0.347378198784753	0.40775943121401	0.336432457251814	0.36586811288079	0.143896419542066	0.293605482947873	0.279097400131516	0.513422211448336	0.451630084980024	0.533006505890602	0.317408009355926	1	0.471487991791623	0.480396809632	0.208764407646214	0.222558416889584	0.177821951679773	0.182039447678185	0.211401987139385	0.186421397192856	0.257521534381727	0.187481011466275	0.227412313270758	0.131605005495833	0.132926729968751	0.0781803329496114	0.0897409703429829	0.144895902439704	0.239079354864262	0.148211229746029	0.343551210423623	0.18596514014183	0.0593576536867309	0.242064603477391	0.315390307507029	0.121166099236184	0.0673233040359102	0.248865558090597	0.277578468664996	0.144404405230567	0.151837876699511	0.0781378404942155	0.0976146803985668	0.250529704372755	0.194798604234929	0.0349515789395382	0.020023162907311
C3002_6_CD	0.233725387091629	0.407880895171772	0.426552215728914	0.454125564313815	0.384458043655018	0.319411362436372	0.170441992361073	0.284482815662937	0.269187286930935	0.517558661701853	0.551907748464553	0.426439290724	0.448976759280735	0.471487991791623	1	0.497568144525691	0.118326711529858	-0.00879268368233988	0.135930319019048	0.0571837615510039	0.117162433643569	0.233184751939898	0.181919663824901	0.157331508150854	0.224395968476819	0.244722818640492	0.113619967338572	0.127322375637752	0.11463382506419	0.202853931729791	0.220423983754914	0.170516995633237	0.0655763365077351	0.0715407920759288	0.00126473224169737	0.191137349074743	0.292060352376882	0.185821580771269	0.161269216012173	0.290872681931058	0.280052637075983	0.133849981598117	0.294319794003589	0.287014999337346	0.037923784695348	0.24676355732748	0.27490140734188	0.0262149844209533	0.0950061078406798
C3002_7_CD	0.35207131361169	0.424581582841512	0.33040748612044	0.466558138120977	0.359252157324499	0.294816001170118	0.13583728062736	0.231322452295	0.246261524712912	0.53104137659475	0.465151774521189	0.553800845617602	0.303557772575564	0.480396809632	0.497568144525691	1	0.106123243790947	0.203384425721452	0.21093514157999	0.0963845845350533	0.255200127794809	0.248073195626725	0.257522096989603	0.228903107807965	0.262500523899277	0.160383162184904	0.0996895072450058	0.0879528467768169	0.147936910273361	0.158912590094811	0.283811691666578	0.255631320686193	0.139340275899886	0.232217565042676	-0.0095770875025288	0.129218241153214	0.161836030322702	0.191967882967376	0.483931512795267	0.272142150384338	0.369316761273174	0.243181306260223	0.251609476177968	0.205514314729334	0.129515792941075	0.489291651729739	0.447597099001284	0.467958577129134	0.343625577159802
C3003_2_UC	0.267019362571849	0.269793999885565	0.173103854746558	0.244014010846559	0.251319243959513	0.238313245173144	0.0930901961319436	0.165621287224907	0.0938865987811106	0.0727420647492526	0.00261618941252876	0.198146991674317	0.164564539556078	0.208764407646214	0.118326711529858	0.106123243790947	1	0.399100197794997	0.460577386624116	0.516223214611851	0.176059503704273	0.129650078593171	0.307677594011214	0.243945612576596	0.17593929886705	0.242862886488899	0.324751709610372	0.254305159621877	0.214580963082389	0.268135546077254	0.289129708578547	0.214975649308088	0.0533928119228764	0.128492655809263	0.225782149367596	0.14001958968627	0.214298538704406	0.236083907853134	0.221433149735411	0.33318190318455	0.320007613794228	0.264095405435881	0.31330059993421	0.315845678763223	0.226209354112175	0.281119847495849	0.378762095151519	0.309586103844152	0.196132380742294
C3003_3_UC	0.082372895554375	0.102918804095649	0.0868746168969682	0.0524591411374153	0.0220964777524301	0.0454153352286682	0.0965056331249246	0.0983958828196734	0.0576707571396595	0.0329388609815861	0.0615521194524316	0.0960936374828951	0.165783596636122	0.222558416889584	-0.00879268368233988	0.203384425721452	0.399100197794997	1	0.412761658991612	0.446939109366184	0.155681433617764	0.0591937146341104	0.243474291207053	0.183059498973174	0.136388101565723	0.176261770446862	0.271420583483387	0.150080644875765	0.160810730120068	0.271794970707608	0.278914121495113	0.324502373298272	-0.0541104466929002	0.066736900661396	0.0847760171719627	0.0289215664402329	0.137952449077586	0.11898437087639	0.264326191581159	0.363642179863428	0.200977602925557	0.375137945693966	0.279385864299844	0.278095827137757	0.144715178059937	0.181114666337992	0.147921757868388	0.29244048805085	0.104675248321812
C3003_5_UC	0.188591872189376	0.204377301682513	0.115145688230839	0.143745312971538	0.210319846747592	0.136318325155342	0.156114088265165	0.0851062790535558	0.110299404791276	0.145982532761208	0.0972784332769021	0.138486751178037	0.174663254209208	0.177821951679773	0.135930319019048	0.21093514157999	0.460577386624116	0.412761658991612	1	0.467621441108098	0.203912886704182	0.0779223399407587	0.319703996374518	0.240630784704079	0.222238991443503	0.307027038631993	0.264139665986403	0.239848465829753	0.224176179701163	0.307350228194789	0.303190790970543	0.264675837446551	-0.0118368663877613	0.164989215686085	0.168715139703068	0.189034000608432	0.334807288135491	0.358913786418033	0.236134618290048	0.366268004538403	0.361545010839681	0.271539013713864	0.325355262276614	0.27031727628524	0.200538001656211	0.336040975244602	0.301326070114125	0.324040356541017	0.220200367504963
C3003_7_UC	0.168769539021728	0.154014246710775	0.1059118072512	0.104460872243292	0.177982163845368	0.121457174277823	0.147737715574306	0.0994509269065421	-0.0155586348662106	0.0871294076079923	-0.0157589363917358	0.0425036269602106	0.128136533350256	0.182039447678185	0.0571837615510039	0.0963845845350533	0.516223214611851	0.446939109366184	0.467621441108098	1	0.162344399468787	0.173303087341071	0.253585744193823	0.194742697101219	0.20880837687387	0.277316671999539	0.26992683405474	0.271458684853945	0.171829412185123	0.28642037531483	0.266554021798303	0.294692025755984	0.0660990313728834	0.0860855024920524	0.229208671753868	0.0772883810374973	0.203167832338821	0.301050341747198	0.362505368167546	0.310459152188411	0.351181981132862	0.228281280886426	0.366290454288357	0.26115617169117	0.326446381258202	0.31463048610912	0.214129166072151	0.266618817191936	0.275987339554439
C3004_1_UC	0.162209305676517	0.193554500949374	0.11587045162111	0.260707995801938	0.0849655215291795	-0.00343580503598868	0.227909214474401	0.0530075005912887	0.254923512426524	0.185115682870908	0.209778244397753	0.217242104746464	0.166035427254184	0.211401987139385	0.117162433643569	0.255200127794809	0.176059503704273	0.155681433617764	0.203912886704182	0.162344399468787	1	0.35652222570291	0.486054676238081	0.46076643195897	0.444164618591787	0.177187787201828	0.0997434073635936	0.145075683008618	0.208632124077224	0.212778867304939	0.186608584159354	0.0544470055524115	0.132327897935878	0.139560508418312	0.141909115343932	0.157082895760235	0.20978275794921	0.217758151711278	0.106938046089954	0.129986244257581	0.214980391913406	0.0962230380027505	0.0974630314311634	0.0598209584038779	-0.0212556727332313	0.218508620161665	0.243255809325371	0.0301993027996087	0.262024777444894
C3004_3_UC	0.0798184904176007	0.146230976862693	0.188908778084407	0.153717123428398	0.150365907786872	0.149001352968425	0.225999949099938	0.116456273472024	0.190276122121271	0.269331146303249	0.290307464994929	0.317163151498509	0.166826702877215	0.186421397192856	0.233184751939898	0.248073195626725	0.129650078593171	0.0591937146341104	0.0779223399407587	0.173303087341071	0.35652222570291	1	0.288821718217113	0.334449264712133	0.272306876318876	0.151791723100217	0.0894011718156511	0.143746473689273	0.145429588492127	0.218173681461406	0.23386933794341	0.192099860345975	0.0472506729459532	0.126990918516488	0.157712891269072	0.163955188238228	0.148849493501351	0.0698215148684462	0.268773394658445	0.157155326765759	0.202190328583274	0.187441266128349	0.103188609847039	0.143889089499686	0.183379383189342	0.255566692304917	0.161059291308791	0.124213245387566	0.169745636966081
C3004_4_UC	0.189072293662946	0.256001278882058	0.147799173459861	0.222783473622777	0.147780069392012	0.0517410592013767	0.252375057906627	0.164250265939455	0.161556825687214	0.263953044377779	0.266148744691857	0.23864036622474	0.22828092902686	0.257521534381727	0.181919663824901	0.257522096989603	0.307677594011214	0.243474291207053	0.319703996374518	0.253585744193823	0.486054676238081	0.288821718217113	1	0.458884208951237	0.492714566483277	0.219853104295828	0.197157723783907	0.263043585154519	0.206661071899538	0.320775533108867	0.228818076605156	0.191495456536859	0.181801454227309	0.194527390170314	0.145456393170465	0.201805348583393	0.261202106141168	0.252582173159174	0.0894574008887058	0.26868340402155	0.269069101397103	0.258220344585212	0.212603429356388	0.158398912661641	0.140290303333562	0.300344077023516	0.196755885770497	0.142829789915328	0.174511341455456
C3004_5_UC	0.178937585441502	0.176569067766052	0.136028142686729	0.219200062629712	0.112866821733064	0.106193474151125	0.165100118097888	0.209234072141739	0.169048876892923	0.118988765879694	0.302461321738761	0.200302603650003	0.222784620014264	0.187481011466275	0.157331508150854	0.228903107807965	0.243945612576596	0.183059498973174	0.240630784704079	0.194742697101219	0.46076643195897	0.334449264712133	0.458884208951237	1	0.446267803433467	0.206714852439646	0.134970090059524	0.181694168104927	0.222230875709158	0.217627877443033	0.182707009348923	0.123262418213668	0.0438845178898845	0.154703036540805	0.104444775990513	0.173303130314022	0.255783862325486	0.169658763105408	0.060052537276092	0.159345631948918	0.152593753595124	0.0899572508553227	0.147971734302759	0.149779433846298	0.000145447076320862	0.185681472147307	0.213950367539466	0.130002913839844	0.174680338085173
C3004_6_UC	0.301970875356073	0.310251867098117	0.277695529473784	0.254834813042862	0.286129535438969	0.0887489724108659	0.21611979254516	0.237340290168744	0.28790747832412	0.277942185921744	0.361962436891602	0.284828824912121	0.263208332940022	0.227412313270758	0.224395968476819	0.262500523899277	0.17593929886705	0.136388101565723	0.222238991443503	0.20880837687387	0.444164618591787	0.272306876318876	0.492714566483277	0.446267803433467	1	0.258570753750801	0.176899006581261	0.228034378037977	0.12685237934383	0.228530016139478	0.160915710421082	0.0929143335257646	0.184222106468067	0.0344156182346476	0.131601957813402	0.141996946160592	0.26577341131988	0.120383889301815	-0.12239320221512	0.241055491444762	0.222643544565848	0.0975205785927355	0.15136841544581	0.186226967793302	0.10065034455302	0.101758265296931	0.143027024442457	0.0591096742632623	0.153439866580691
C3005_2_UC	0.221139349009449	0.112243843371377	0.149273752332516	0.133073111530496	0.199482344423723	0.113864381438453	0.0679148329815968	0.0458799835562909	0.183695674157098	0.204604278083969	0.160690415864776	0.155038943334777	0.257380929503471	0.131605005495833	0.244722818640492	0.160383162184904	0.242862886488899	0.176261770446862	0.307027038631993	0.277316671999539	0.177187787201828	0.151791723100217	0.219853104295828	0.206714852439646	0.258570753750801	1	0.346388901727871	0.39561929913391	0.432274965074512	0.260656185239816	0.237403103276806	0.200637471965492	0.0326024773233514	0.0260870827880978	0.263611355305404	0.283751263856333	0.346132579821715	0.32195246694609	0.178238323596506	0.331900674008027	0.357341693267191	0.152476063013626	0.263591416973938	0.298854691019548	0.183150454666048	0.226322076675065	0.176332647449656	0.196177416364387	0.213453419070221
C3005_3_UC	0.189459837999362	0.164828428950224	0.131678465921752	0.017081751060163	0.165229683682959	0.11228283395555	0.000466420972237568	0.114387484951541	0.156708787767288	0.104106593201604	0.0609859809047613	0.191385055328493	0.215112018715875	0.132926729968751	0.113619967338572	0.0996895072450058	0.324751709610372	0.271420583483387	0.264139665986403	0.26992683405474	0.0997434073635936	0.0894011718156511	0.197157723783907	0.134970090059524	0.176899006581261	0.346388901727871	1	0.408913430605759	0.304948523247267	0.286311624754735	0.216693021200371	0.240626288586733	0.043651987777474	0.068485177415775	0.121725613449545	0.180053482819933	0.219195657873944	0.206141051906297	0.132551516625033	0.292985619481238	0.216067420527019	0.21872510484597	0.286100240780387	0.276059268493114	0.0300700843673982	0.136997952887724	0.210821931975794	0.247994924281186	0.0937860735327284
C3005_5_UC	0.143960580098292	0.191647504244743	0.100965054197373	0.109335058435763	0.181354953666061	0.144355382924818	0.150418297912906	0.215903097810415	0.164139317610583	0.076830063058864	0.0517240447745108	0.110077602960577	0.172917671412172	0.0781803329496114	0.127322375637752	0.0879528467768169	0.254305159621877	0.150080644875765	0.239848465829753	0.271458684853945	0.145075683008618	0.143746473689273	0.263043585154519	0.181694168104927	0.228034378037977	0.39561929913391	0.408913430605759	1	0.347441653827266	0.249618863516285	0.137876854834448	0.124570591640547	0.15696251414364	0.151021961279548	0.154755821971466	0.152516442690236	0.212514434958563	0.13342997777975	0.145515088983259	0.251418189992975	0.26302894481492	0.110182890091272	0.284215456680215	0.263420775216623	0.0767712480952669	0.174252811571428	0.175901119847092	0.162361878520238	0.116346580414636
C3005_6_UC	0.0943963605473064	0.251982143400753	0.11053428915138	0.122560750516027	0.183446206968238	0.306091051130332	0.123374549797078	0.190094368228191	0.162284215824778	0.18372389316777	0.129558190383661	0.142817063140612	0.198397637256921	0.0897409703429829	0.11463382506419	0.147936910273361	0.214580963082389	0.160810730120068	0.224176179701163	0.171829412185123	0.208632124077224	0.145429588492127	0.206661071899538	0.222230875709158	0.12685237934383	0.432274965074512	0.304948523247267	0.347441653827266	1	0.182289081303696	0.186729943916504	0.142746950826479	0.19552301542995	0.150927530504861	0.27563924894842	0.317982373022496	0.331082796213007	0.22932030868201	0.123338541316043	0.191716420729809	0.150076128468837	0.150744202332391	0.176746853763096	0.217445013798082	0.286205561401839	0.158503268746624	0.135200923462195	0.16266000033989	0.102066237153761
C3006_1_UC	0.226648979062388	0.169710834792975	0.180825047474493	0.0714304165618837	0.147949478845012	0.0818260942134931	0.236601548045255	0.100937748881376	0.178039547430918	0.165841834243293	0.244310762050383	0.161254955286765	0.120457500982038	0.144895902439704	0.202853931729791	0.158912590094811	0.268135546077254	0.271794970707608	0.307350228194789	0.28642037531483	0.212778867304939	0.218173681461406	0.320775533108867	0.217627877443033	0.228530016139478	0.260656185239816	0.286311624754735	0.249618863516285	0.182289081303696	1	0.364351938495785	0.425680620202335	0.0748210047137642	0.0784103457541121	0.189006690081785	0.213773297323648	0.290180883672533	0.25126528165198	0.222668001408121	0.371727140362676	0.313507956364046	0.30446759034803	0.342669670568814	0.297468940137812	0.26683586194174	0.220912728582039	0.233212180858206	0.227362965101456	0.0826058468505257
C3006_2_UC	0.240269355344431	0.21040019752344	0.208330809577302	0.21780750849614	0.126730726973099	0.233227945985401	0.246121159595275	0.110933418417364	0.164057305437363	0.23906605047001	0.189420338740472	0.243934667855359	0.141919813995325	0.239079354864262	0.220423983754914	0.283811691666578	0.289129708578547	0.278914121495113	0.303190790970543	0.266554021798303	0.186608584159354	0.23386933794341	0.228818076605156	0.182707009348923	0.160915710421082	0.237403103276806	0.216693021200371	0.137876854834448	0.186729943916504	0.364351938495785	1	0.509965825229633	-0.0541090441271188	0.184425159742169	0.227024454388234	0.117312001623511	0.173427617093086	0.263265136003861	0.346650428231532	0.456639476257152	0.325044620117147	0.487572011173717	0.394044357718826	0.281603805832662	0.301436151411427	0.314204810069715	0.141020643361219	0.333488198052419	0.246547227633215
C3006_4_UC	0.178045761262105	0.151132487150919	0.165764409248191	0.10186998306443	0.112523688628391	0.146978706567266	0.237203553296651	0.0625975659119645	0.122803061824011	0.219077908715885	0.168385906753713	0.192291085989148	0.135828623327167	0.148211229746029	0.170516995633237	0.255631320686193	0.214975649308088	0.324502373298272	0.264675837446551	0.294692025755984	0.0544470055524115	0.192099860345975	0.191495456536859	0.123262418213668	0.0929143335257646	0.200637471965492	0.240626288586733	0.124570591640547	0.142746950826479	0.425680620202335	0.509965825229633	1	-0.0705962141914744	0.185030966840125	0.210771368776673	0.15168506465643	0.148030034369327	0.291503799004406	0.273389353840955	0.417876108524529	0.269942974492739	0.39217223530553	0.314730849342892	0.230992266846803	0.18522923459229	0.1973522963837	0.215815331368462	0.285490881308444	0.202342789881236
C3007_1_CD	0.200396241599407	0.207806510835385	0.226763366812966	0.0769420806763463	-0.000141902397995984	-0.113102984371787	0.232514460318008	0.0887937174060476	0.279835947683103	0.253315721729478	0.294633277532074	0.223893986050109	0.203381159494235	0.343551210423623	0.0655763365077351	0.139340275899886	0.0533928119228764	-0.0541104466929002	-0.0118368663877613	0.0660990313728834	0.132327897935878	0.0472506729459532	0.181801454227309	0.0438845178898845	0.184222106468067	0.0326024773233514	0.043651987777474	0.15696251414364	0.19552301542995	0.0748210047137642	-0.0541090441271188	-0.0705962141914744	1	0.451493625392562	0.0582840102701953	0.17333622275898	0.230957525670384	0.188000479258259	0.0549340110025298	0.149185534759177	0.207695276486036	0.00433730775634635	0.189612769650296	0.0671780667905117	-0.193856099870951	0.000459678886891126	-0.0550765699208307	-0.138085712870006	0.0632276155799144
C3007_2_CD	0.218199168996063	0.0974752363351715	0.204095024971844	0.307620845192178	0.0902583118362122	-0.0401916545181756	0.159045358718702	-0.0558790502887931	0.29834305215144	0.115242098997667	0.112679726170705	0.149665692843765	0.0458698885011376	0.18596514014183	0.0715407920759288	0.232217565042676	0.128492655809263	0.066736900661396	0.164989215686085	0.0860855024920524	0.139560508418312	0.126990918516488	0.194527390170314	0.154703036540805	0.0344156182346476	0.0260870827880978	0.068485177415775	0.151021961279548	0.150927530504861	0.0784103457541121	0.184425159742169	0.185030966840125	0.451493625392562	1	0.319830928786097	0.109273771324089	0.140664732118842	0.115965995672496	0.390284733946986	0.181491431419025	0.26835890913479	0.198365100039411	0.0822211886187695	0.125941322280701	0.185588313833846	0.364893231267408	0.295604368827008	0.347398852357681	0.435591111102291
C3007_4_CD	0.150009198838489	0.167476463266808	0.017523490895619	0.0857374722564074	0.116063108019186	0.225485712820888	0.00833156341794085	0.0222935012921001	0.0984532448304205	-0.00607853506647514	0.109062880977067	-0.0358181533821609	0.108436714482761	0.0593576536867309	0.00126473224169737	-0.0095770875025288	0.225782149367596	0.0847760171719627	0.168715139703068	0.229208671753868	0.141909115343932	0.157712891269072	0.145456393170465	0.104444775990513	0.131601957813402	0.263611355305404	0.121725613449545	0.154755821971466	0.27563924894842	0.189006690081785	0.227024454388234	0.210771368776673	0.0582840102701953	0.319830928786097	1	0.162064750681823	0.166411272422608	0.208081621609304	0.410725845976611	0.219487284135722	0.28320052491039	0.120700543160135	0.25885337545163	0.262561635732335	0.482437873427304	0.267318486474478	0.247867895653488	0.253758442449478	0.379802003614774
C3008_1_CD	0.0688268696299759	0.235766298017048	0.234815502443622	0.116502415962947	0.155032070787582	0.119382274618477	0.130937745917106	0.199116486247714	0.161544416602837	0.274075317655395	0.195737755707915	0.240422027611597	0.146718732034968	0.242064603477391	0.191137349074743	0.129218241153214	0.14001958968627	0.0289215664402329	0.189034000608432	0.0772883810374973	0.157082895760235	0.163955188238228	0.201805348583393	0.173303130314022	0.141996946160592	0.283751263856333	0.180053482819933	0.152516442690236	0.317982373022496	0.213773297323648	0.117312001623511	0.15168506465643	0.17333622275898	0.109273771324089	0.162064750681823	1	0.467736400962618	0.391238797537238	0.0356090596912222	0.190169598844261	0.189303133400648	0.0945582308919727	0.178554724886322	0.207173569925524	0.163719417889992	0.105044563679842	0.0750317516860568	0.00764770560217264	0.0981348500786848
C3008_3_CD	0.269034939694919	0.318752390440583	0.263025015021215	0.246541157246382	0.229541737576471	0.220757485656094	0.144755916210056	0.305686220231484	0.28003419547865	0.256528184087257	0.209548644471843	0.291128250835488	0.22777725687149	0.315390307507029	0.292060352376882	0.161836030322702	0.214298538704406	0.137952449077586	0.334807288135491	0.203167832338821	0.20978275794921	0.148849493501351	0.261202106141168	0.255783862325486	0.26577341131988	0.346132579821715	0.219195657873944	0.212514434958563	0.331082796213007	0.290180883672533	0.173427617093086	0.148030034369327	0.230957525670384	0.140664732118842	0.166411272422608	0.467736400962618	1	0.455903000210448	0.0570649011442496	0.314115084045896	0.331524273289795	0.125344128959476	0.243649094594398	0.223547805708804	0.270533385598275	0.16011147405736	0.0694867919300118	0.0237320704683565	0.0785237475745131
C3008_4_CD	0.168866528413343	0.384324288475651	0.233723673991303	0.275963236326766	0.171252694964942	0.350689500949844	0.297850346939664	0.243814969792668	0.186516580338203	0.169786357176614	0.204237359738715	0.21443773077354	0.182364048293129	0.121166099236184	0.185821580771269	0.191967882967376	0.236083907853134	0.11898437087639	0.358913786418033	0.301050341747198	0.217758151711278	0.0698215148684462	0.252582173159174	0.169658763105408	0.120383889301815	0.32195246694609	0.206141051906297	0.13342997777975	0.22932030868201	0.25126528165198	0.263265136003861	0.291503799004406	0.188000479258259	0.115965995672496	0.208081621609304	0.391238797537238	0.455903000210448	1	0.255755253762165	0.358674704481357	0.329393272865089	0.212170364071652	0.207104951682373	0.222935990739439	0.23714930397535	0.261676606215988	0.244332677682223	0.172423281634127	0.291375046517184
E5001_1_CD	0.329387733622663	0.200716431454061	0.196270016285506	0.485882704318582	0.130894077587543	0.165429749748908	0.155224705220826	0.0857710817317474	0.0821199906277599	0.117920552951748	0.0719124320431164	0.0758337081320257	-0.0724197805991341	0.0673233040359102	0.161269216012173	0.483931512795267	0.221433149735411	0.264326191581159	0.236134618290048	0.362505368167546	0.106938046089954	0.268773394658445	0.0894574008887058	0.060052537276092	-0.12239320221512	0.178238323596506	0.132551516625033	0.145515088983259	0.123338541316043	0.222668001408121	0.346650428231532	0.273389353840955	0.0549340110025298	0.390284733946986	0.410725845976611	0.0356090596912222	0.0570649011442496	0.255755253762165	1	0.410813757016022	0.415340621686015	0.451617600593028	0.338868328864877	0.257137956714636	0.431523715168913	0.516674283326428	0.431832090851871	0.537815660041054	0.436724919363305
E5001_2_CD	0.27791556842142	0.285774926024776	0.266562288588596	0.219821680866188	0.193853508585885	0.165429796428233	0.14903682120427	0.181462466213517	0.268868380738458	0.397217719299769	0.301232702730506	0.223242183835726	0.233477741959869	0.248865558090597	0.290872681931058	0.272142150384338	0.33318190318455	0.363642179863428	0.366268004538403	0.310459152188411	0.129986244257581	0.157155326765759	0.26868340402155	0.159345631948918	0.241055491444762	0.331900674008027	0.292985619481238	0.251418189992975	0.191716420729809	0.371727140362676	0.456639476257152	0.417876108524529	0.149185534759177	0.181491431419025	0.219487284135722	0.190169598844261	0.314115084045896	0.358674704481357	0.410813757016022	1	0.481873972474314	0.470448717120234	0.486628251307293	0.313918081802663	0.242590940024111	0.297336977976102	0.25279246863995	0.367167696835192	0.307940961632878
E5001_3_CD	0.299648629940106	0.345519336006695	0.244927127837097	0.336573544950296	0.133059428977274	0.164761462225086	0.187832028149202	0.101373036927273	0.196059817749736	0.328768803497253	0.340524697183044	0.275188404888283	0.226644186216142	0.277578468664996	0.280052637075983	0.369316761273174	0.320007613794228	0.200977602925557	0.361545010839681	0.351181981132862	0.214980391913406	0.202190328583274	0.269069101397103	0.152593753595124	0.222643544565848	0.357341693267191	0.216067420527019	0.26302894481492	0.150076128468837	0.313507956364046	0.325044620117147	0.269942974492739	0.207695276486036	0.26835890913479	0.28320052491039	0.189303133400648	0.331524273289795	0.329393272865089	0.415340621686015	0.481873972474314	1	0.326225106238328	0.492718859431331	0.44665959637566	0.244778143756741	0.342251261707501	0.340041791387716	0.269617406495704	0.253947380044249
E5001_4_CD	0.144657400364489	0.0778146942245163	0.0960105800924867	0.0306645119852495	-0.0303646417017003	0.0227079929462067	0.0637146128893356	0.095201922561696	0.0757934776257373	0.233602294761756	0.222333863337074	0.181645099194108	0.159833153630917	0.144404405230567	0.133849981598117	0.243181306260223	0.264095405435881	0.375137945693966	0.271539013713864	0.228281280886426	0.0962230380027505	0.187441266128349	0.258220344585212	0.0899572508553227	0.0975205785927355	0.152476063013626	0.21872510484597	0.110182890091272	0.150744202332391	0.30446759034803	0.487572011173717	0.39217223530553	0.00433730775634635	0.198365100039411	0.120700543160135	0.0945582308919727	0.125344128959476	0.212170364071652	0.451617600593028	0.470448717120234	0.326225106238328	1	0.379821661426906	0.262469740394727	0.245777547228022	0.290841526280184	0.213307285335535	0.37273489464395	0.141137421195796
E5001_7_CD	0.213965553060481	0.223254219569411	0.148817319204492	0.0628207451909817	0.175387700769159	0.0890245027908297	0.177197550535862	0.15927960434811	0.159752184390185	0.300476289012329	0.348422864731312	0.216517804047252	0.212870504554243	0.151837876699511	0.294319794003589	0.251609476177968	0.31330059993421	0.279385864299844	0.325355262276614	0.366290454288357	0.0974630314311634	0.103188609847039	0.212603429356388	0.147971734302759	0.15136841544581	0.263591416973938	0.286100240780387	0.284215456680215	0.176746853763096	0.342669670568814	0.394044357718826	0.314730849342892	0.189612769650296	0.0822211886187695	0.25885337545163	0.178554724886322	0.243649094594398	0.207104951682373	0.338868328864877	0.486628251307293	0.492718859431331	0.379821661426906	1	0.465000859603372	0.273544587295425	0.200832139448	0.206031164261667	0.194965965572395	0.181550847147198
E5001_8_CD	0.261075793844065	0.209078720644248	0.200363588442727	0.122440095295073	0.165188248311535	0.09461624209948	0.191403252889762	0.244686450256013	0.153824294497948	0.293660137110753	0.328745944354669	0.227528794909653	0.226480452883008	0.0781378404942155	0.287014999337346	0.205514314729334	0.315845678763223	0.278095827137757	0.27031727628524	0.26115617169117	0.0598209584038779	0.143889089499686	0.158398912661641	0.149779433846298	0.186226967793302	0.298854691019548	0.276059268493114	0.263420775216623	0.217445013798082	0.297468940137812	0.281603805832662	0.230992266846803	0.0671780667905117	0.125941322280701	0.262561635732335	0.207173569925524	0.223547805708804	0.222935990739439	0.257137956714636	0.313918081802663	0.44665959637566	0.262469740394727	0.465000859603372	1	0.329431090899993	0.268058975308432	0.272721964287715	0.252730393234071	0.25808279735773
E5001_9_CD	0.14837619239589	0.242360097264075	0.17420586037296	0.148782509716768	0.169658501802009	0.199590725111606	0.0594395080060505	0.182402106176954	0.0896497431008921	0.205342377733733	0.1446936784803	0.0569413788839273	0.138826770882238	0.0976146803985668	0.037923784695348	0.129515792941075	0.226209354112175	0.144715178059937	0.200538001656211	0.326446381258202	-0.0212556727332313	0.183379383189342	0.140290303333562	0.000145447076320862	0.10065034455302	0.183150454666048	0.0300700843673982	0.0767712480952669	0.286205561401839	0.26683586194174	0.301436151411427	0.18522923459229	-0.193856099870951	0.185588313833846	0.482437873427304	0.163719417889992	0.270533385598275	0.23714930397535	0.431523715168913	0.242590940024111	0.244778143756741	0.245777547228022	0.273544587295425	0.329431090899993	1	0.272798167329777	0.106579322684242	0.19805037485299	0.221864234893036
E5002_2_non	0.37095422946606	0.200031390242548	0.186542514739106	0.458637329355965	0.114848030348785	0.230048344448866	0.18102674301205	0.21364384068299	0.155889979414633	0.164499616052268	0.133169522578774	0.266107667788675	0.0776349258936103	0.250529704372755	0.24676355732748	0.489291651729739	0.281119847495849	0.181114666337992	0.336040975244602	0.31463048610912	0.218508620161665	0.255566692304917	0.300344077023516	0.185681472147307	0.101758265296931	0.226322076675065	0.136997952887724	0.174252811571428	0.158503268746624	0.220912728582039	0.314204810069715	0.1973522963837	0.000459678886891126	0.364893231267408	0.267318486474478	0.105044563679842	0.16011147405736	0.261676606215988	0.516674283326428	0.297336977976102	0.342251261707501	0.290841526280184	0.200832139448	0.268058975308432	0.272798167329777	1	0.394656453948084	0.490174181843238	0.385751600948882
E5002_3_non	0.309395204369184	0.145059998386	0.236783600504462	0.345147473898525	0.136227725418931	0.0605153771759924	0.191614642521034	0.156034335891447	0.0895838029531003	0.148994958524503	0.264512281723746	0.144716769243116	0.0824048384673598	0.194798604234929	0.27490140734188	0.447597099001284	0.378762095151519	0.147921757868388	0.301326070114125	0.214129166072151	0.243255809325371	0.161059291308791	0.196755885770497	0.213950367539466	0.143027024442457	0.176332647449656	0.210821931975794	0.175901119847092	0.135200923462195	0.233212180858206	0.141020643361219	0.215815331368462	-0.0550765699208307	0.295604368827008	0.247867895653488	0.0750317516860568	0.0694867919300118	0.244332677682223	0.431832090851871	0.25279246863995	0.340041791387716	0.213307285335535	0.206031164261667	0.272721964287715	0.106579322684242	0.394656453948084	1	0.410527106548351	0.342712179366721
E5002_4_non	0.265963335157413	0.0177877686578747	0.0989955448743811	0.370574346811058	-0.00720340176909733	0.151129851989257	0.0587877134240232	0.100831893796603	0.0405189588745869	-0.202983061440772	-0.11227895330693	-0.0202155190103595	-0.111199476027022	0.0349515789395382	0.0262149844209533	0.467958577129134	0.309586103844152	0.29244048805085	0.324040356541017	0.266618817191936	0.0301993027996087	0.124213245387566	0.142829789915328	0.130002913839844	0.0591096742632623	0.196177416364387	0.247994924281186	0.162361878520238	0.16266000033989	0.227362965101456	0.333488198052419	0.285490881308444	-0.138085712870006	0.347398852357681	0.253758442449478	0.00764770560217264	0.0237320704683565	0.172423281634127	0.537815660041054	0.367167696835192	0.269617406495704	0.37273489464395	0.194965965572395	0.252730393234071	0.19805037485299	0.490174181843238	0.410527106548351	1	0.370908444513524
E5002_5_non	0.252491992882132	0.173106405029265	0.245617914481951	0.311475950525039	0.0850482513234833	0.168056688498589	0.160802425865266	0.127024779111126	0.0670466133571139	0.0235540646162552	-0.0139815077584318	0.100468578651152	-0.0239578281105741	0.020023162907311	0.0950061078406798	0.343625577159802	0.196132380742294	0.104675248321812	0.220200367504963	0.275987339554439	0.262024777444894	0.169745636966081	0.174511341455456	0.174680338085173	0.153439866580691	0.213453419070221	0.0937860735327284	0.116346580414636	0.102066237153761	0.0826058468505257	0.246547227633215	0.202342789881236	0.0632276155799144	0.435591111102291	0.379802003614774	0.0981348500786848	0.0785237475745131	0.291375046517184	0.436724919363305	0.307940961632878	0.253947380044249	0.141137421195796	0.181550847147198	0.25808279735773	0.221864234893036	0.385751600948882	0.342712179366721	0.370908444513524	1
E5002_6_non	0.207788178534209	0.346027807932166	0.242838754425122	0.1308599566873	0.256677620175319	0.0689680161769545	0.232160968732606	0.176508928101208	0.189757525355714	0.272691557906043	0.337128264085444	0.273329411431332	0.29161586943477	0.299228518257705	0.359262389461491	0.16253024119607	0.37666902696292	0.278883842890645	0.326688747400917	0.324753605118172	0.184213824503411	0.227942219004955	0.279843809208263	0.141712635055993	0.252434661701764	0.272889584763304	0.266408803114366	0.236834323825122	0.210495316294845	0.323732383487603	0.256770602478665	0.268752136904194	0.151813045912819	0.0193947935370112	0.178694325524896	0.176424538706346	0.132682587282948	0.252295717317879	0.0683360085895866	0.31726609211399	0.33288993697355	0.299717159394415	0.359322068923335	0.383799748444377	0.0856326628495198	0.207406803734409	0.301200148457829	0.236786503350658	0.190407486434285
E5004_2_UC	0.256714910753759	0.180582226214762	0.107510938867733	0.11553335375589	0.0915802572357136	0.120683657867467	0.0474768093059462	0.122400743101985	0.120381767033419	0.271813919333451	0.18419330513061	0.20745820176495	0.254184017190173	0.152231696954915	0.132860187788356	0.299575442177305	0.261626125373981	0.349124555984985	0.289379189327661	0.282749828253453	0.0304002245169126	0.0454292302020619	0.1251481513958	0.068126187784504	0.128363295935751	0.205738815185345	0.261535712899139	0.192572927507698	0.233466922565914	0.249360135748004	0.36788123699789	0.327658532378045	0.0143411895742801	0.152816362991277	0.257682455097858	0.15272970904122	0.146135419421077	0.249351018669657	0.329307259847291	0.390745987953684	0.214939559047526	0.43837967715216	0.385078884534943	0.31721530655693	0.297728512143004	0.234966392455662	0.172321436147152	0.33080017279708	0.237670900345094
E5004_3_UC	0.226401850969067	0.215853838566078	0.136234432729442	0.127338464238017	0.131568721435484	0.11027242831054	0.0881024289552631	0.186833858643376	0.13486400941547	0.290676603667955	0.310619060104608	0.178925488619535	0.250094567119867	0.144266187737581	0.223320297470829	0.155699925900969	0.323343539927658	0.320449669433962	0.348766558875583	0.321584694885699	0.14453695780995	0.107003037279075	0.27435932338155	0.126944931030425	0.23164876470665	0.273209368128663	0.232063804452452	0.231987966964925	0.218401537301733	0.268884896809146	0.326482402087925	0.266786587878652	0.0949265996113534	0.115682779423158	0.273568757753237	0.174721005183102	0.215580479958544	0.201604013567017	0.25676201965688	0.387316816761974	0.296740270968468	0.372352647208086	0.388458311183346	0.337738302879788	0.327225282417948	0.263073014693014	0.214550956313392	0.293624049586636	0.297980971496698
E5004_4_UC	0.249871514490374	0.0732708850506638	0.151513271488198	0.0227769987662357	0.0979723691095716	0.0557791609902282	0.057326091195381	0.135466057750842	0.151612870797557	0.151465845165103	0.167037222793367	0.129438874753168	0.167357154104978	0.0924577063040386	0.174422789389424	0.185430774468396	0.306242263357164	0.328286683597545	0.354720952770987	0.341767799797984	0.25025134521023	0.171597715286241	0.26363597081001	0.188312247443446	0.200801316585212	0.246586737583465	0.357791313145418	0.290028463336603	0.176141259624745	0.291330367407127	0.260067300087095	0.251055377349516	-0.0126410623626691	0.125507890033324	0.261524802928016	0.179217112557666	0.172525046004758	0.221468008993311	0.274865045080948	0.264799293309074	0.238006996580759	0.239282403038697	0.289915015779401	0.300684045306725	0.12435401190151	0.248881775217348	0.229736290808989	0.298093619419129	0.241010039346621
E5004_6_UC	0.176689649586914	0.250848188558265	0.121296675431025	0.209512263931508	0.18786812680579	0.124503845737881	0.0707972018367741	0.239073173140974	0.100952322495793	0.233286678941172	0.219801497087617	0.169108541834424	0.253340390304655	0.183225191235322	0.201033653182801	0.19153368515355	0.318214181473165	0.252480235416361	0.331220275120643	0.366424270429659	0.111944112885361	0.11589451271396	0.213436671685659	0.156352918964939	0.21585386960045	0.217877033734442	0.288381058846201	0.281454718645453	0.289039569881472	0.241945405355933	0.248369835846938	0.232594327472622	0.0506128062640751	0.201859473442995	0.375549041682656	0.169352940744292	0.16950767144988	0.257602998979752	0.37234922714114	0.271452051468319	0.321458318246795	0.234874311719084	0.355073044725813	0.324722066694844	0.384356065784021	0.266663958653571	0.286948586160271	0.301031518109701	0.312896653460666
E5006_1_CD	0.216290663262987	0.242818416800885	0.150901698001912	0.138082855517824	0.180998522124559	0.196365940990915	0.0468264070429883	0.159829628389392	0.172749660395757	0.264181408877501	0.221819625055552	0.225077870926945	0.280265129974037	0.220323056623924	0.279771889866867	0.236046052413787	0.307331407287124	0.307204962356017	0.237847393305022	0.319323851944887	0.145137335157171	0.191815507155132	0.235577476514269	0.159372858079248	0.16523611359476	0.270892918860747	0.23873903128573	0.185389991361068	0.207418099439218	0.234063779523911	0.393920910010126	0.323468885242914	0.036003140331902	0.124992651983918	0.205883693408846	0.156194735859981	0.147713486966356	0.177158413156326	0.278909613622212	0.390799397546563	0.324309294250755	0.403330412320607	0.272560001215761	0.206183035826823	0.333433567690303	0.300685421156681	0.147024826252256	0.276411903995469	0.088548460921094
E5006_2_CD	0.0343997180296258	-0.0533130895293013	-0.0579365718531138	-0.188350776183546	-0.068099918460809	0.0205355720230715	-0.0381031155672399	-0.0960149320048314	-0.0424708411502281	0.0994114170553683	-0.0509298647356602	0.00322996427718719	-0.0213586946897451	-0.220369666897777	-0.132491911357172	-0.150826807935424	0.246394717813279	0.363105051434395	0.264911405957549	0.267494469830422	-0.0979836825022458	0.0541302556253442	0.0493025038327395	-0.0448194720238866	-0.0228889010176037	0.157799227301702	0.247920165088412	0.0632696199604813	0.170661538125302	0.165039224968876	0.376391744083543	0.360365936027777	-0.0612455797660876	0.0227933956534109	0.0918961414918565	-0.0690700902279924	-0.057934428124661	-0.0221165434881428	0.148194968211851	0.325419299054535	0.194808415413225	0.397669771281257	0.245652007391485	0.208259733595813	0.131728670227874	0.0833288790340625	0.100185688880052	0.239840994740072	0.0759495046343564
E5008_2_UC	0.375166325052064	0.279646700454867	0.21075700500272	0.379691307316161	0.135789357218286	0.212804257671159	0.153380590370219	0.131743629212777	0.0671034357528014	0.119191029778759	-0.0379539275131427	0.0319494534139701	-0.0856970709229222	0.0858623302293325	-0.062872871687723	0.418935176996633	0.150984067657798	0.140420822977058	0.104706698375265	0.103013943181973	0.273192816594601	0.205130708819852	0.21502279691428	0.216462488579741	0.0407141901336753	0.274802629386114	0.0857276484057232	0.22141126137008	0.287794372689925	0.0836560387881406	0.214481694279767	0.186769418684363	0.023225109989515	0.384475018699788	0.395309333762881	0.023509496109182	0.0154085273132104	0.0846431400361129	0.523610190460556	0.155642999772893	0.304105866739505	0.153596134430838	0.151085294676822	0.137277431546522	0.302304891193743	0.393887540227987	0.384072342360111	0.420402546688865	0.428645248065532
E5008_3_UC	0.303026436938009	0.0263075382913595	0.163422201516581	0.460369089674549	-0.00542246716991561	0.0596919930893403	0.104218920050636	0.00811829390203023	-0.0536461775521757	-0.177569366327844	-0.180585285226178	-0.107564325332883	-0.286750800347182	0.0812346620047038	-0.121011005390587	0.425900826740415	0.0620186919925529	0.00794695537241365	0.128662967660083	0.163499620250347	0.20280907435746	0.154742117058399	0.162919186210617	0.0736005924041347	-0.121160852352761	0.0365560576873165	-0.0348385933067261	0.0611885005015837	0.0405548427432209	-0.0403865305209324	0.0188892185159175	0.0844695696090915	0.0936220150171824	0.389017789194814	0.270994297863423	-0.15000651950091	-0.1743691693768	0.0892084393797088	0.49603230589992	0.0790979624473011	0.244581126843274	0.131876285147514	-0.0699307696404882	-0.0189218119499532	0.262461484563027	0.459410293772173	0.45421998966584	0.489946296491808	0.476540187326533
E5008_4_UC	0.352338041355175	0.156872295046588	0.199202040802258	0.398834784950294	0.248122137365113	0.0865514553905571	0.10354189743182	0.194000852929393	0.0635999407809591	0.148522374259179	-0.0319880605148735	0.0453001501165006	-0.0830302399007513	-0.00373924420413279	-0.0350293236703409	0.398303769784522	0.163126432400702	0.0740041804384216	0.130495939819762	0.224189841411452	0.286660321048945	0.317933884750821	0.234744548554118	0.287197615374081	0.172642955003845	0.247911614964273	0.172775715673433	0.186538515823296	0.261051645415753	0.101908195495537	0.159208789585439	0.133794594513394	-0.0493989804406983	0.299551558701993	0.224349417629319	0.111682971076192	-0.0106373255286172	0.11590376752383	0.503821343718474	0.119103021790014	0.248449344436949	0.169906576049149	0.134404649122947	0.225826394601354	0.266903963052385	0.370039540306279	0.371248686130024	0.394363299860876	0.380137632961055
H4001_10_CD	0.297287573084627	0.189206965595253	0.231812714245465	0.252960101318411	0.145530301377321	0.0482726261926879	0.209228597011625	0.211973967717444	0.165023736782821	0.220882877565881	0.194865780246825	0.226688782194482	0.133532573641741	0.190025273173223	0.25639382368037	0.34657587875727	0.0486629142536281	0.0581877658629769	0.126269650960724	0.105115245760548	0.133251113531776	0.170512485020576	0.143615529293053	0.21901834599955	0.123346659936905	0.0542721996829346	-0.0286064000255476	0.00173556222090197	-0.0198657219422651	0.159015196579998	0.149714679153574	0.0849312981766287	-0.0173035687182767	0.198772763282492	0.21716216792524	0.0319368099050362	0.0919003007400959	0.0919420117826234	0.263540055790437	0.140906325471629	0.263681010960395	2.70522818498396e-06	0.138992992806019	0.184681877681581	0.149440918427879	0.285068246636661	0.356029727453621	0.202786632784532	0.213781847376632
H4001_4_CD	0.316447493082451	-0.309981666192694	0.284600944031585	0.546743236720533	-0.234186292253524	-0.228316386995628	0.0820031097519186	-0.223933451388674	0.0240393214480475	-0.166258954443032	-0.311872662425845	-0.172187105617411	-0.227100792047431	0.0746050423190862	-0.154207194942596	0.480906827686969	0.0606580450703526	-0.139951614281693	0.0855078644676051	-0.282107093336152	-0.330116595631102	-0.168833694013683	-0.293574141751903	-0.299864712160742	-0.456731992873505	-0.234647649445455	-0.471595847701483	-0.488679928322058	-0.41696537549045	0.0978054778885839	0.27987726486712	0.239770575810195	-0.195885911475971	0.362578415035059	-0.174035307590984	-0.320102096098217	-0.381617186164454	0.077804099003077	0.671407120307705	-0.257426917892385	-0.22832919900355	-0.0196786520708238	-0.173159684132085	-0.448769452801934	-0.0743290420887258	0.548313690484867	0.445252774462042	0.609159077680774	0.456195095575167
H4001_5_CD	0.0429589621140732	0.0780875251463504	0.102823136134948	0.0491892874659685	0.07680055598888	0.0117260852591509	0.223180305819325	0.147992938373215	0.178419373051299	0.131803887212209	0.199131953461329	0.0377272679672008	0.0886542825940674	0.102987304778947	0.213349877430895	0.138514797481007	-0.0223735964622718	0.00908192448543404	0.0829345114250681	0.0249565510301764	0.0353560596403484	0.153971777251706	0.114321722990679	0.0991695598764765	0.189918795730299	0.0563202224471122	-0.0131343385411272	-0.0238444798620849	0.106584907470339	0.0774551046427751	0.143377918497113	0.154900129082308	-0.00325161557100505	0.156811758351056	0.14030092513212	0.095284737072844	0.0806235735325701	0.127515067443398	0.00109335299722272	0.0885299673709238	0.148608566383058	0.144790755959879	0.128146764045622	0.249649169491455	0.053080922545876	0.0345738376012551	0.0675156219129768	-0.0862770237086098	0.120353990390867
H4001_6_CD	0.178368142570845	0.114353083367232	0.180840179158997	0.229079162409386	0.129944234652121	0.137587821775936	0.106765658036686	0.136784122026012	0.124792549057975	0.222554014660616	0.235153180117781	0.2374117176305	0.152590138283756	0.158838618414729	0.246050721248478	0.269552119859204	0.167373087309998	0.127152048439114	0.206611232350804	0.132145574108952	0.138891527595126	0.138882121313302	0.146769418968318	0.133902428358583	0.133930797301852	0.165781827517329	0.000668283279112804	0.000207394228111318	0.0754414428272032	0.145734704995124	0.128326988176098	0.152688199561793	0.00115548214803284	0.223722234743297	0.208467809923202	0.156040126662459	0.0784001582587067	-0.0277580540297565	0.284470338158154	0.148164668727389	0.211603492929806	0.165085660878777	0.149159996988738	0.200332629298341	0.0283055324161368	0.320278339561313	0.279045049847629	0.256852828348762	0.266833589447421
H4001_7_CD	0.238399286391466	0.0963528896015064	0.173330108684798	0.422707158181916	0.0170763178644562	0.0203646794330169	0.210072090066357	0.0894416716320325	0.0389081344544699	-0.00851361597501055	0.0498258558651383	0.00348036072483126	-0.0943470495683426	0.106411113504269	0.000357986866181258	0.309084400021851	0.0566699019681843	0.0308298522043005	0.0401056923798428	0.0851664373173993	0.072263135286025	0.157633244177633	0.057166291262757	0.142437523299574	-0.146702647223546	0.0214637050934421	-0.153042814131545	-0.0685678464969146	-0.0606846630524868	0.0145925608595405	0.145928322401803	0.0695891829727498	0.088856142168277	0.371348254671059	0.149890117302722	-0.0704554274160452	-0.0531750349628746	0.111841128177471	0.502006405329596	0.0588542060936635	0.0956326177507174	0.209998114109332	0.00932524790045224	0.00774078916790476	0.390927769773016	0.369478551080939	0.301105772910252	0.379495225667168	0.346379920566475
H4001_8_CD	0.204492651563968	0.0278931505247648	0.141421822705015	0.441717434948056	0.00183699732554928	0.114486727386024	0.141446481901252	0.103448450503495	0.0161515688731098	-0.0195748428844637	-0.0940565362001846	-0.0273176760487943	-0.269486668997366	0.100775486892182	0.104363501540236	0.351047241922203	-0.0535727112887307	0.034079394023072	-0.0235587535032486	-0.0274418405658385	-0.0418173956016662	0.0298333343933755	-0.0470106638977192	-0.0286981219450962	-0.131076116125899	-0.0190284001393201	-0.220745151440313	-0.112336249206364	0.0893079896044788	-0.135574559673309	0.0882364878202146	0.0560140727084121	-0.150120898438613	0.365808193302578	0.0881395949413435	-0.307556550516612	-0.197577629557095	0.0156663034028999	0.453670001903558	-0.081132218183371	0.0473598224400722	0.0906493735993822	-0.250908388202455	-0.189321312161963	0.0412643084493505	0.379486015965174	0.359271987009252	0.393773522408584	0.449014835204336
H4001_9_CD	0.256394217942498	-0.195173735111128	0.212198627619852	0.457077402630645	-0.249813967449993	-0.0390130203671634	0.0739678707967191	0.0845003366184968	0.0354145581176342	-0.0303827328508452	-0.148118759364779	0.00727902788318583	-0.204396461441339	0.0972175935515899	-0.199851944692206	0.412552905304641	-0.0809853949798337	0.0298013738416794	-0.0637489892650766	-0.0267357350279964	0.0193079447416758	0.1395613107589	0.123361122898118	0.0211263971084022	-0.31171650129091	-0.112666953306501	-0.198454810576517	-0.175493628782706	-0.217262804632749	0.0127679621441134	0.0922722881272833	0.11069866202662	0.219542437992967	0.394954373599925	-0.113500851115211	-0.3090510853302	-0.244024756104391	0.0616636287678025	0.603069004552763	-0.228112072980001	0.0499582630778088	0.0569207634033094	-0.2123161394035	-0.279913892241196	0.0222967061412652	0.505181586558777	0.354714274709154	0.541331485569822	0.515553480833724
H4004_2_CD	0.127810291878773	0.337404509030747	0.127643549136667	0.317186225761081	0.218250832070905	0.168509368050593	0.208235031072829	0.313544429899328	0.125726542186281	0.220870277007543	0.184849304584369	0.35926092833032	0.123475157248674	0.353166690144865	0.300076861590337	0.36270517231012	0.381396882952129	0.198531338154934	0.378997050208441	0.287762775775194	0.159870093017003	0.162284983706035	0.333372012312242	0.277927292088237	0.289704106190876	0.3005112974851	0.0211179511687655	0.198911812068099	0.225444602102751	0.163902167463647	0.152770645092069	0.092402838225569	0.0243240757386827	0.151725140015782	-0.0127612472122976	0.245957115705733	0.207741923817356	0.262043503017174	-0.0241670936720549	0.119005126741076	0.184585396377559	0.144206371573286	0.0927519486195861	0.182925371244146	0.0255086277049502	0.0775866943393024	0.245538165147832	0.0806184429182091	0.132309190823104
H4004_3_CD	0.274605336266281	0.196145020275953	0.2312193697637	0.221511771066082	0.183256247543878	-0.0352483853992581	0.0888936298756123	0.325563771088955	0.0835636935230207	0.164482795870599	0.0681410948345867	0.0799289529509993	0.0971043743213465	0.0717330498284544	0.159299181998417	0.0737090093353562	0.26351885040103	0.102851730852609	0.239297396165928	0.248365395661329	0.194640620767259	0.129873042198016	0.308632562635088	0.248582625389208	0.301376029733888	0.123231717844034	0.202529217305639	0.215943330148999	0.110814637136059	0.0679423594314375	0.0221617450292149	0.0428612040171493	0.0391547896908275	-0.0433681735316924	0.0753335041594487	0.11678843698971	0.211640360087913	0.173452002247711	0.120077679490069	0.136050620738863	0.171239462528694	0.0166734777808151	0.184930710744891	0.268738929792154	0.227141231747059	0.097134514913356	0.306817537685079	0.0128119340626147	0.180470039561704
H4006_3_CD	0.283602185047636	0.250617520593035	0.00305979808781976	0.190045660399133	0.229475906146472	0.239129841133619	-0.079034895205907	0.0186387509129535	0.0398377454711497	0.405821219036629	0.170769809909563	0.181885507545259	0.135838555025654	0.193099933667374	0.18246335172022	0.367703548179105	0.432593233515823	0.340557240029025	0.327299645494045	0.325716034486852	0.010966389495316	0.148491372242843	0.0746186039969649	0.0743447187561906	0.112464654726712	0.154281238181227	0.208868840369264	0.174777418284984	0.141524558028163	0.209525687472242	0.316644260117449	0.27014050057541	-0.0556539052225417	0.131995297127005	0.282980283829323	0.0528962523338384	0.0200882122850011	0.0587709967342272	0.305223777721958	0.287534738646188	0.277349213556567	0.345201631852259	0.274980164315987	0.22849955681119	0.259862656634289	0.304752590583046	0.297380377760771	0.385657012600432	0.187569321297817
H4006_4_CD	0.165890303633929	0.0986135067455006	0.143130793117456	-0.0313153865654751	0.184564497237966	0.0661954489513459	-0.150637099796335	0.0347443715525234	0.0592018887551577	0.193719514418306	0.202287000493083	0.184078800942451	0.217435863502886	0.0948203178631127	0.150130136370869	0.134487090493472	0.158059178272382	0.342761890826703	0.218649478285177	0.221252276390684	0.0897003593787029	0.0327396652979988	0.0830562587386626	0.0761095332671808	0.144671651577028	0.181802103690394	0.390813638643522	0.248575985375882	0.0890245846917409	0.226890448772013	0.189108113945652	0.222130578019944	-0.10617783924712	-0.09825534703831	0.0943250031801637	0.0625291039461177	0.0186337895289525	0.0472308790004101	0.165225235063758	0.283269327675984	0.222871778032424	0.213863022490785	0.245386444837914	0.286305684618924	-0.00734236675245895	0.19286434635543	0.220121278281654	0.286066901446416	0.0928917104640464
H4006_5_CD	0.187509449453791	0.162754510432675	0.110329183544346	0.018688432929072	0.167716630853409	0.0740664204380765	-0.039828684603323	0.0673851243004994	0.0744513162347764	0.0496265573735798	0.0318855426376429	0.19106673169353	0.127960502162687	0.143168769235317	0.0337890677995098	0.191247368827699	0.197009034804983	0.333011954603844	0.182417331570971	0.178513086577698	0.128872466415896	0.0910593974974552	0.099806635081496	0.0599255881358848	0.0957155785484989	0.156194719937991	0.320831078089103	0.240967352569526	0.140216953152375	0.260503169448764	0.204369112438719	0.22633235082638	0.0201185644268686	0.00173669406154304	0.151680725046313	0.067980255868466	0.0793215915906909	-0.00593070691829092	0.295967902526404	0.28433861286374	0.168739337476282	0.325144058685317	0.231950742369083	0.21755294079012	0.141862557939104	0.196390818150697	0.216343274433897	0.312437844945885	0.114700778300085
H4008_1_non	0.298225035695755	0.0906542562630704	0.269829616692669	0.33966474656202	0.109744560104009	-0.012837599135443	0.154174689652437	0.207148732252612	0.179693250201476	0.0116510224028175	0.0395634536031068	0.0691726598699546	-0.0873919660322281	0.0814009324755597	0.0172906718837545	0.331652692674395	0.119614687159731	0.134592389926926	0.0718144409000481	0.131876617475903	0.209533243013108	0.0921671284298714	0.102281470497369	0.161811478111521	0.0111437644956889	0.0934880930343387	0.140032960243779	0.135923684310503	0.137654246572938	0.158492833545068	0.158013377857744	0.141007246487429	-0.0336459456524658	0.260644313152134	0.292705949331918	0.031399432400861	0.018808827037172	0.0564042920960852	0.430764317876133	0.160986934128339	0.0997923106126161	0.164713107549266	0.102870923575077	0.199431491054675	0.0241821376985591	0.394061431045585	0.287827727735161	0.418592262180905	0.337261493359213
H4008_10_non	0.173880939596273	0.210067376772552	0.142736804716634	0.174826623773941	0.199207227288243	0.272308089880586	0.180698791158928	0.215755686948635	0.19931160515366	0.332071174342153	0.291802578005166	0.207409795047284	0.193162850275867	0.138388911706755	0.11588275483422	0.346083104681816	0.202591266449962	0.127016716925854	0.256227651291771	0.196295108523592	0.213559895197424	0.194635391594242	0.177849193150363	0.246454339834972	0.221758970074632	0.233515746795671	0.0821477592016149	0.153945023467572	0.21114768430668	0.243794877302522	0.256372662971966	0.156543346027098	0.182998855568438	0.252253075586294	0.22273161892072	0.23086634391366	0.247107427371875	0.156290288877799	0.195916863756472	0.236413268711116	0.302831790640925	0.16608542483709	0.269411805900469	0.314258635321701	0.354375405203899	0.277488683331051	0.17988574819299	0.189832614492988	0.163196216061664
H4008_11_non	0.214963803455157	0.0661733176545296	0.174446447549028	0.107921978146291	0.197848192674689	0.044856721179153	0.0871732654923245	0.0523330683834857	0.202780906552482	0.170173406335001	0.138726443063704	0.125078107869044	0.167904993181383	0.0579546342051939	0.136585446803246	0.130884827003608	0.188277310361764	0.173581224504362	0.297449835778214	0.194469123474413	0.190884992759829	0.207790972208381	0.201858421585846	0.234542288039141	0.264126870468334	0.324687292882986	0.215281370566826	0.213263394604922	0.212588287586518	0.242702435359777	0.234304678385744	0.195549721359487	-0.00746169867220291	0.101282284702503	0.217170794035144	0.18305177456955	0.198127686563052	0.144309971309745	0.206157165471137	0.299418815827108	0.228986826577103	0.245552858397547	0.31698469142506	0.32141599805278	0.232134281689483	0.210903501528463	0.215972444466938	0.248661801177446	0.280093384173209
H4008_13_non	0.297763794687539	0.16371042311179	0.159946651398288	0.0893689196911002	0.255813197023992	0.220051998312695	0.034677154008646	0.116607212573157	0.0907957919133843	0.289044494962388	0.245614637702657	0.155675120538419	0.132587630914271	-0.00244948775177769	0.15505162381353	0.185145002808537	0.260964023040167	0.345468693407114	0.288606120193832	0.304421972869831	0.158584661808409	0.179362267444832	0.221282979743982	0.11578842222722	0.151311447127432	0.207052903883375	0.27398747366942	0.22931783519497	0.21951629779979	0.353179842878262	0.404455023393506	0.324414933189889	-0.0812642653135503	0.138108119729098	0.246690565998289	0.0429487544352229	0.0900892348579739	0.0634765486623249	0.323416958382349	0.332663952138527	0.31940954679249	0.374683710402044	0.366629060927115	0.391340271240045	0.190762387535355	0.334556520515876	0.271568001600479	0.436072613234863	0.251229279297124
H4008_15_non	0.0558558392762049	0.110079063767814	-0.00196257227121967	0.138030479974351	0.22081514728612	0.335384405177226	0.0402911889731017	0.178155614094696	0.126304365585777	0.117060835823066	0.166969229646212	0.187197306010966	0.261351270627473	0.114851985498317	0.180114594160814	0.176060854273518	0.140875206291657	0.113452992923255	0.230544076081898	0.0290453299789991	0.228023569169901	0.12361126316613	0.123497730900148	0.185283388623827	0.143577042834961	0.19819175968756	0.174053668903304	0.147059965001246	0.185477475133085	0.158695675082618	0.190630571078891	0.156735596698002	-0.0238074577299838	-0.000619693492381244	0.269750654396467	0.168565747524798	0.204746318529581	0.182255832278038	0.0361822656552718	0.183628615471702	0.170405600158849	0.125595568209558	0.119287207475012	0.224088372362623	0.128185808477684	0.0353526184106246	0.0620433700782172	0.071192713170749	-0.110167476535083
H4008_17_non	0.21603874231197	0.161393895224956	0.0701842005507339	0.132584521528048	0.19654999511155	0.180880692950698	0.131948826632024	-0.0350441818078734	0.0502303312633787	0.137447633870429	0.0643454440924836	0.129363126240508	0.121763129013835	0.0437115865002604	0.0794683707553749	0.182584980591971	0.258680559813011	0.228029803048453	0.171125982558863	0.270608439115526	0.154873985819732	0.216678309217961	0.12077551367598	0.151031302282223	0.14079324598707	0.253111047936217	0.253348741821808	0.152152823823216	0.260289684550956	0.315454935003645	0.333655510452699	0.256813567131178	-0.00092049180726063	0.162320312103153	0.253228101653363	0.0887086758512807	0.0619824300570953	0.15243333007852	0.416658183043952	0.240089746272757	0.346959631668809	0.263084456412715	0.266141886330979	0.312116564646887	0.288022210306929	0.268049110070042	0.20798941830319	0.311093111711945	0.223982062934508
H4008_19_non	0.179175163426473	0.205227288553291	0.0737998043592887	0.142534935169899	0.181637941654397	0.173643182755195	0.1646426624786	0.157604494217377	0.0291154220268972	0.205548937288455	0.214274675391527	0.148344730712185	0.0975313201797505	0.0925182433432818	0.0572665484010747	0.130010258032912	0.187284813945091	0.0944190181392519	0.262327437008189	0.215384067807258	0.225593361986516	0.215559421937018	0.292095161244279	0.277968111869267	0.317543340606419	0.237457544487649	0.193924375225498	0.214555145765966	0.270706142305586	0.344120195001532	0.199100998885105	0.209279927847493	0.0361045551684219	0.1686312743849	0.420407650942947	0.27043976873742	0.243755349166876	0.152461794126595	0.325496466827117	0.209053268706068	0.334764373702162	0.105781239964163	0.214229043879481	0.265090661867531	0.406713762683477	0.156504277808345	0.27656221399317	0.158244805578383	0.227180462452474
H4008_2_non	0.286114966270162	0.257616603554948	0.192292662382838	0.183868990427474	0.287277412147789	0.244563013870671	0.163534659606416	0.106897198184369	0.151999240242369	0.222815240482525	0.0512897820683094	0.159136337420862	0.152349563971698	0.0458462089139315	0.0414072577309469	0.186202149155472	0.317930107635552	0.21065337541404	0.292765890044737	0.335569310190223	0.194615636315165	0.234277944755351	0.167495477414623	0.21436255132464	0.180134317069048	0.307211669083674	0.207374745301796	0.247322018940624	0.335822203071122	0.275908837682553	0.269235826416236	0.186740315240151	0.0214383590588589	0.205027686269386	0.282148959008755	0.229239355221516	0.228456757358406	0.108282681907242	0.31586087908759	0.233947747838288	0.349886971639295	0.185018115985272	0.308925837949148	0.317397691077142	0.328397190916058	0.258125142982501	0.166951621954761	0.200660563014636	0.277545400473452
H4008_21_non	0.114743098370574	0.0969502958417117	0.00894362200656257	-0.0391528145101879	0.098319917704654	0.121451462829547	0.132701771929205	0.0597963345076982	-0.000459059696412696	0.0946074452629026	-0.0268482019325641	-0.0194140222244265	-0.0452535977958393	0.00312320465517203	-0.0780725373970875	-0.00180045288614731	0.121412626325622	0.066004695443844	0.0242108001956673	0.0381832463171521	0.180700116277339	0.134365281681285	0.195572582039896	0.242184760339073	0.214826419678034	0.11159337049065	0.059436670489772	0.0964172989067566	0.01513213875637	0.256887578972639	0.173289096879141	0.155192842849247	0.0437871459849807	-0.099733669867922	0.161410444613676	0.10090737999768	0.16471154141176	0.088785588125244	0.0897601576309022	-0.0124826781314742	0.159882623654079	0.0865083830876608	0.0640490304610533	-0.004554288776891	0.0753648116901315	-0.0453985850502308	0.0608355715114222	0.094595615637201	0.0768987720011361
H4008_22_non	0.0970573622225918	-0.00143904601335755	-0.0143408762522492	-0.0756310053171101	0.0899094603423337	0.100989516722245	-0.0189723764899063	-0.00702636954204909	-0.0525486271583288	0.057459916657501	-0.0946407202932113	-0.0321124859245139	0.040147763937403	-0.0872904971705475	-0.0928318450806025	-0.0682345918411812	0.297770727767701	0.380030608022319	0.239229972814133	0.39369157337901	0.0458634852718596	0.134373003168753	0.122214756800184	0.142830661594317	0.0559298480526857	0.151114943103971	0.246100986139403	0.143624491719531	0.103168908146386	0.324595263218923	0.324593563909742	0.319879877035317	-0.12973512529673	0.0790560416138692	0.147701461080149	0.0194182928062561	-0.0553488966564613	-0.0365229038174247	0.381903348879141	0.309613121894757	0.241968444252111	0.383388889016741	0.341773196310707	0.252731688199658	0.198285377560543	0.318250621946227	0.183731018353666	0.419934651196521	0.173344366207896
H4008_3_non	0.145918690841997	0.040391016888463	0.0875934197498243	0.0495697632538208	0.0778496185726969	-0.0451117288962318	0.0634665136262271	-0.0359240534172784	0.0490230355163014	0.0991800998714012	0.0928187076020927	0.0728839987629125	0.0355966677322099	-0.0571306881890663	0.0470129423115035	0.12225409641631	0.215120216831529	0.273535788303059	0.22740924367446	0.267428750207762	0.13115713854956	0.197945185412652	0.294740900167963	0.166168921856996	0.170916030196272	0.163448313252454	0.277078314749767	0.202540041417265	0.157202909991238	0.31377458272229	0.274150976920083	0.321114049657589	-0.00134186789601275	0.0903675017414362	0.223649585013315	0.079774792738648	0.0692494402240396	0.0675458580124369	0.311300947873305	0.347735217628901	0.247656334368101	0.303783196040561	0.345185536013159	0.280573607194825	0.179286018151326	0.182456494388537	0.27053855760993	0.310406722877583	0.163252391202163
H4008_4_non	0.17482664136517	0.0782813279049089	0.0698129656544391	0.0316199781870092	0.135231359436942	0.0923069215461291	0.0958139450067122	0.024722964470377	0.0632931433346526	0.125655044637491	0.022568386402046	0.0377541698926955	0.0478793924565229	-0.0737791342534924	-0.0149990788739556	0.0664747948989957	0.27968105426843	0.357534396898218	0.223609681925794	0.262305819184064	0.105169982367406	0.111318165166019	0.148257907828555	0.0924562794159383	0.116359310204063	0.247764483423344	0.293931168477548	0.205675239343851	0.208599688650624	0.285186611371651	0.321174636455869	0.350255549100232	-0.17133109364198	0.0351042090063988	0.143938407242142	0.0825877083614457	0.105176414189261	0.143166603767408	0.338169379744561	0.312179982669207	0.244071198169726	0.427766793394943	0.275282053360194	0.304848951456791	0.273187498612886	0.241175418090815	0.175640866854092	0.32611528437785	0.250288529731584
H4008_5_non	0.185596466764583	0.135714712089999	0.0807628566086717	-0.013457997296889	0.00191222919194378	0.0880192478502797	0.086363879171213	-0.0207336016067914	0.0648596586277724	0.0773426371388766	-0.000979948107130188	0.130598166006582	0.029715127507618	-0.0499866742058965	0.0190097097337193	0.12008911302519	0.264794907421513	0.320812926063932	0.298957394968774	0.24103161294465	-0.0364251297500049	0.126445647580199	0.182794832279966	0.0945541952343327	0.0543480095515927	0.242754849385268	0.294950034655699	0.219677158376616	0.22668581594078	0.298610235776365	0.402876887568444	0.369509376460837	-0.149511410562173	0.0619295852402199	0.223740466383714	0.0876739451311106	0.0920549260004464	0.0845307697969403	0.342146538412431	0.350396189986331	0.35766421211173	0.390869925514713	0.352191150108073	0.282918813243424	0.213821857286898	0.249980513360447	0.119195544948529	0.400869641475415	0.193513609722948
H4008_6_non	0.225165132768172	0.0792139592991661	0.218966738459002	0.113160637526978	0.108413873254232	0.111208955558806	-0.0194009410970777	0.026501947628737	0.105684929726694	0.146147933729463	-0.00433837489534174	-0.00365160374731414	0.0693908759576019	-0.147339762424581	-0.0689926932199481	-0.0480212241510321	0.199790312944611	0.212468970764701	0.173675216747583	0.154016525567574	-0.0620534786832512	0.0692492936758181	0.00218315682587765	0.0171387695252875	0.0767376211195694	0.150384384080761	0.173576163650212	0.140243655289098	0.131774159550421	0.210609689305006	0.242663447935672	0.254141422584757	-0.130726032341379	0.0720981310887106	0.287986691465234	-0.0316112668395256	0.0810119333071484	0.0522040638367156	0.320990004045814	0.266532924558942	0.253072049767225	0.266120988809947	0.313561603606019	0.234989718175582	0.285252129853577	0.269238563380641	0.15032261547541	0.222687975928004	0.273641207653038
H4008_7_non	0.3007221176075	0.111634617402618	0.170642570460733	0.133938395460117	0.189097400670075	0.133311032351776	0.0591961902086337	0.166683221783974	0.117834481873509	0.166249860874902	0.136502671900829	0.150684697397889	0.0826069079132032	0.0474139842279035	0.0927266084577087	0.187826903811344	0.317565243896184	0.271202776804415	0.301262328984018	0.32703249245351	0.10348708325014	0.176132219347384	0.100132685729298	0.137601653361004	0.120630323393232	0.224163957816668	0.264867571546374	0.196408832169217	0.213853432303242	0.273612694004547	0.351918134900785	0.299803358441521	-0.137356166632982	0.146857140066293	0.174185299840769	0.146248073845069	0.161554560455815	0.155353308030826	0.337458439267623	0.315863904796439	0.309452549802548	0.349251300236439	0.356847174948108	0.354061854306726	0.302995947576107	0.32750228633898	0.255777356599018	0.398248845541906	0.242616814923959
H4008_8_non	0.332447773575879	0.232057113534097	0.161077613800019	0.0213420330571532	0.134921066378686	0.212018620575042	0.0588757191249811	0.0351268956257298	0.159753516939132	0.242845757571683	0.10824874042442	0.0701217762914606	0.0398974793843708	0.10737629422948	-0.0369001067374548	0.0588959806444395	0.285001787121216	0.298990998062673	0.140258484546033	0.312870939322784	-0.107869056140546	0.174379236133125	-0.0931445915815592	0.0173141856836951	0.0491598799105507	0.209256769848831	0.244181389528682	0.185394917706822	0.111546338700535	0.208545846534329	0.294705381657283	0.294464551607887	0.0456748922242993	0.16098838724178	0.260074819573724	0.0688910468594513	0.100622668894498	0.126878380055464	0.360349233871801	0.212804542789754	0.249031928548586	0.238708618033639	0.197636376193224	0.231417462286476	0.391095962446483	0.317166399453104	0.238653629977795	0.28161007849714	0.279114156092951
H4008_9_non	0.225668399157245	0.126833086432668	0.0780976276762658	0.0299063839577542	0.207649269367246	0.247113714826648	0.132028220372037	0.18121640539008	0.113561259374363	0.0849192010558558	0.131655597385382	0.116435443427017	0.179365914236169	0.0400015429871879	0.110564765782557	0.172844755663175	0.181289560220678	0.124771655655209	0.256947420687459	0.180627239203404	0.258544698280055	0.191289794731701	0.218908362200395	0.231415564358998	0.174839005756342	0.259921376242136	0.199680212246816	0.268875490106086	0.186476532920052	0.235585898785799	0.219507443778649	0.209744460314715	-0.0739622806786248	0.0507183415322454	0.264749963301369	0.218490492593466	0.283613337031932	0.172782041249646	0.30501752295827	0.2550444449324	0.29054984091317	0.152384171708067	0.210690834567108	0.293703605301504	0.297527736040684	0.219970497473172	0.230906176768713	0.33552622817689	0.26816397037014
H4009_1_non	0.252323763666508	0.158587226381858	0.149385223499861	0.081563094508773	0.172355578259071	0.168438201343314	0.108622508141119	0.16375332103753	0.154566025974341	0.198039490320726	0.107353266992164	0.181858233348544	0.170754715395179	0.0988544849326419	0.0889028019208451	0.182177596827671	0.237068892860574	0.308939985790608	0.23241635340903	0.271780045889586	0.0958027843018169	0.130123902582719	0.134769370989626	0.142531377550299	0.0987375836246931	0.205939672142624	0.26724990798254	0.0975649236814787	0.189118952304275	0.299822577714266	0.35607046162759	0.331542941583234	-0.0260306124498618	0.124750299896168	0.187200798850127	0.11819703637759	0.206505667228191	0.187333842493331	0.348138533084434	0.344295552084648	0.234755521433562	0.409278878315164	0.32332303900511	0.373081910724121	0.234685805398757	0.218921421698292	0.165990101210308	0.417411902955331	0.183000556076297
H4009_10_non	0.249223514210998	0.199274753604689	0.157750662153797	0.0541703918053917	0.194422429807815	0.172471117075982	0.114434473212216	0.0271641012373416	0.0977936205019086	0.225977174887288	0.154265557742213	0.11232660087104	0.0386367194072761	0.118179344229508	0.123363771315346	0.141132211929284	0.296024910199424	0.201952831240137	0.331510309042535	0.242471980552593	0.148196692215773	0.121412986338057	0.197427035705002	0.173972107249171	0.170736976710819	0.225811598815194	0.181224999614219	0.170586188592411	0.260009942709648	0.251629488027578	0.214872695299863	0.216558732497857	0.229809231477892	0.207032881798781	0.190932381146997	0.0616100834890048	0.118779034462137	0.127914483115923	0.177670388501812	0.196928743305472	0.271601580283504	0.194975471090151	0.251848678100224	0.296081615453646	0.179352792398964	0.180037353051993	0.168421353036543	0.309190471242888	0.230200157048227
H4009_11_non	0.174409346499011	0.0205022062207051	-0.0374683177756795	0.00377289230333782	0.0614627574645296	0.11294710243758	0.125877328662343	-0.015984322891142	0.0428958508681325	0.218568708407096	0.100441148562635	0.0905572727167869	0.102322818550244	0.0714399494922969	0.0585946819849031	0.0828696104193916	0.181169004473821	0.276964461769618	0.235929347024981	0.209971892823602	-0.0430393193834698	0.131792253647577	0.0164973111943622	0.049677214203964	0.00806217524220418	0.300353999320258	0.220831897177648	0.158864524962534	0.0864565826720885	0.181471586290209	0.288519591020117	0.221520130695324	-0.0712739319161499	0.117598292883302	0.25901117196994	-0.0337257369157163	0.0548453837371148	0.187651311514144	0.275181452291554	0.273181049682483	0.261547088097198	0.316891151304314	0.294904021939592	0.229944770837536	0.124520632131854	0.280384515576643	0.142196336468687	0.360427848346593	0.210708205588475
H4009_13_non	0.143843691108696	0.21213207626523	0.0613901382952421	-0.00584557725567246	0.160140671243995	0.243993924634377	0.131137414151543	0.00948737073534801	0.06084366070288	0.130040240428427	0.10890996873423	0.145599693626651	0.0363946609162529	0.0387874201722424	0.118239498908325	0.124083591704431	0.258014652579308	0.16711915824198	0.24033784984781	0.143739219967625	0.0232558671891464	0.132861080058059	0.0257333352601613	0.0746328658747398	0.0248522723918804	0.199477741941885	0.113607114712202	0.123148661733633	0.25153186396587	0.242565806797997	0.292585786401333	0.235456140904964	0.104240770315708	0.0605090010142737	0.278134324497866	0.105673369903539	-0.00422607079079295	0.167665175497879	0.222213174677713	0.122658430923856	0.151878593603255	0.198550387734299	0.215809776212756	0.281846799776253	0.265664536704743	0.13453723038502	0.119026572386603	0.194608182746466	0.303628173719575
H4009_16_non	0.223198760586888	0.164392213134784	0.164178112454409	0.0582677495756468	0.226780766239946	0.171484173639765	0.0863150010128518	0.214239439377287	0.0604856488902407	0.230205661976105	0.120412608287096	0.171619689495002	0.126141635047604	0.134900658261391	0.120099454509531	0.0748154989302205	0.13451273410394	0.147148576051321	0.144800231733837	0.224880188770392	0.079910589809861	0.147767997117346	0.0225153538485712	0.0960077181790572	0.136395904677264	0.17080993998794	0.128471300116896	0.207600852707134	0.0655453629907502	0.207432973150831	0.142647632401291	0.137941733908849	0.00158987335093698	0.00766766347445044	0.248959919731703	0.185328642524517	0.0495782370147303	0.0878516162441801	0.177200333425336	0.210158339685521	0.193658038095398	0.211639833764432	0.187149694420937	0.232762360745529	0.238071774627308	0.178609121001158	0.152450561680882	0.191360624207994	0.158646586353797
H4009_18_non	-0.298637665007809	-0.214044761099338	-0.115934611023012	-0.0827505514833511	-0.0722704002429647	0.219205372257031	0.0773373611749819	0.0568562927243969	-0.0923955731744946	-0.166055201346154	0.0172543503867854	-0.0216271253621698	0.10539655773788	0.0842891620171367	0.0215585115537226	0.0553244401763264	0.144628363408473	0.00888399018593877	-0.100169068144924	-0.162649574351898	-0.058243204881629	-0.103792475364782	-0.223290848020271	-0.099181123060827	-0.174464150808477	-0.181969797903388	-0.113254570477977	-0.130900568691474	-0.0702173152414389	-0.243224776376597	-0.0595070690642939	-0.00410653024360865	-0.141841380559895	-0.0748534708271901	-0.202395030566538	-0.30048559257982	-0.1458231788445	-0.110003235681515	-0.212566205580259	-0.131102585577389	-0.00364884024594981	0.0807198354629858	-0.0400445714288515	-0.0639610162748184	-0.13811980930371	0.0150646455999323	-0.23944206702573	-0.127249867330509	-0.246101880801574
H4009_2_non	0.103189885119162	0.122906931427423	0.0335324359603939	-0.0334298183192812	0.166560186027484	0.151330347430051	0.113407945682744	0.0607514563354642	-0.0174370761746428	0.0850004371562186	0.0289298342595114	-0.00369875311084591	-0.0273893852058027	0.074507414075679	0.074000806407119	0.0126130889870749	0.106817541287839	0.0501313249327609	0.194829643711789	0.343409758735399	0.0730411291451004	0.162453013941481	-0.00437110032999156	0.074017804284136	0.0224268468465149	0.112342588016079	0.0181602236310563	0.134795860493255	0.0964235216363347	0.074036598054517	0.132108297731328	0.112891158352402	-0.0449596451411247	-0.108642570537331	0.100938847870784	-0.176400900200358	-0.14272127463075	0.0219799307839512	0.0874377402263039	0.0960869192356839	0.189232270360112	0.125130088984844	0.15793254018063	0.192957673098748	0.162359574542053	0.0349281719503632	0.0408317012200329	0.0280376031363689	0.0749368630214452
H4009_20_non	0.259207673345721	0.304504265008721	0.232461142197891	0.221237630032339	0.296684445010418	0.228081387567947	0.197525591682094	0.30221400882784	0.243913390751238	0.190953215496198	0.220998804880734	0.26723120552331	0.225243717294047	0.246195625940768	0.287396550693809	0.289865286846563	0.19595874580781	0.0993684315932993	0.199540638901158	0.134178134902465	0.158856425935531	0.200426968644766	0.17246962537408	0.248901221986211	0.187674414478607	0.218966723024855	0.140209630620739	0.131818267006915	0.239771008361769	0.14050278810334	0.20714925394829	0.139170115816894	0.213269222602093	0.196723737754518	0.0672792075877219	0.225154790330633	0.251271659787115	0.194486391463408	0.157439133269827	0.232340135651311	0.268067986229623	0.180508212695281	0.154949178676054	0.285450204421882	0.201401541729334	0.217575997576076	0.155114018759623	0.0832542967146537	0.125221524014739
H4009_22_non	0.28537734538677	0.104566008769803	0.164297511961865	0.127646403956289	0.31150741617461	0.179186180522403	0.086051489871608	0.150118882068916	-0.00875166817157911	-0.000738834799457831	-0.110136753309602	0.0192622738889435	0.0885477069785306	0.00580299830793333	-0.0932322969255	-0.0624031640196492	0.187218678812111	0.11594463248166	0.266886948831788	0.250909098716442	0.158457745435217	0.129668612798832	0.102440387133257	0.0633752922418208	0.197543482670313	0.131314818660858	0.138340995263946	0.184851346443622	0.181549154303344	0.0963600516073913	0.148045327436722	0.102916217236036	-0.0668357886827431	-0.00531400544594191	0.344153533887735	0.033427025032022	0.0900535981304364	0.134990102786445	0.286116156902802	0.0771988432803281	0.176942752490196	0.147857811577921	0.200826377355734	0.2851565986588	0.325866202722445	0.255404131802082	0.251562588795853	0.122159277366018	0.243052336336979
H4009_3_non	0.317215719077284	0.254942999409983	0.245032028718849	0.166378418504513	0.155295902969113	0.212318719601385	0.114369009296893	0.243227970550867	0.168875658465841	0.201727884182609	0.106926194632339	0.167897327506013	0.188915610819968	0.222397596484823	0.269165226267805	0.175440037196489	0.273088880373905	0.277880167819268	0.255052663609082	0.275636847635436	0.099274072148126	0.102459229857487	0.168138778563353	0.213150620571658	0.225590310743581	0.259369402800687	0.17786888284429	0.172016205363357	0.271124052739491	0.256931680621622	0.204973115897175	0.18921520483972	0.0820289555500687	0.16909079069872	0.191328670302488	0.129088028701775	0.143532421860535	0.157834415974376	0.234920735215043	0.266175282285992	0.274283510786058	0.247206946480344	0.282501089193334	0.250552141141753	0.234504163852987	0.1931058813079	0.226370883581538	0.340530833565828	0.210621067350579
H4009_4_non	0.113606458242459	-0.0691683836655261	-0.0397958510031487	-0.0630779441158296	0.138340371500596	0.114779761659847	0.0329029900454612	0.036430953642749	-0.0871324794841492	-6.04415404343446e-05	-0.0751163491826012	-0.115774469643429	-0.063083678371775	-0.131087529616793	-0.0962409996166275	-0.0576595756401312	0.123851949625561	0.143095283557136	0.105938607861338	0.212109528091432	-0.117881611782016	0.0280701353510504	-0.0442643078166454	-0.0208730606821402	-0.0198031422258447	0.155840372820564	0.0782620219710111	0.0696049417191517	0.070049266660992	0.164045883068888	0.185979179769516	0.14418981340142	-0.0635038454477381	-0.0941484742718896	0.100037861838595	-0.144963560356073	-0.091125824586573	-0.000483384624518688	0.18714035502524	0.15856643484914	0.197733090858865	0.174498434084137	0.286131742531939	0.222376697978232	0.165422013024775	0.101544565149973	0.139554102801469	0.307290276294032	0.193817328356103
H4009_5_non	0.212446782960271	0.169753033550548	0.187494060877186	0.052655055535026	0.203236506832381	0.230812245785625	0.114225002416416	0.147037095857222	0.0791367624266263	0.154599546939853	0.0169099147322287	0.0557363069111424	0.10305502716556	0.0950176441017318	0.137567499766257	0.0937528486504298	0.183639823016488	0.19537561052432	0.21668942050209	0.193521869318059	0.0533080382071197	0.057076814953603	0.0941337507842561	0.0533012395491794	0.107556081576917	0.223959879713956	0.102428341103562	0.10805778447733	0.126557978126043	0.141772599685041	0.206517716057355	0.145585548929253	-0.018640129697482	0.0215407486133655	0.173704459426924	-0.0262064796008607	0.0051046107079608	0.145235314715788	0.191120954811583	0.290347999737149	0.279992642989359	0.23309563740969	0.309862889442021	0.304588738016746	0.249442907469566	0.232144232876577	0.12715805760999	0.272033440530194	0.120633062742225
H4009_6_non	0.0270905626612108	-0.0222505887466675	-0.187231509191679	-0.0689769880916827	-0.0169577989012603	0.0629451278398107	-0.0917834187505616	-0.14250535123763	-0.187203202245959	0.0427481402705071	-0.123162289034858	-0.117809980922714	-0.142711644074831	-0.041415210159654	-0.0901971616986124	-0.042698707339009	0.119951503107942	0.134537938637237	0.100642293928649	0.213960339568639	-0.173240385127099	-0.0530684634403855	-0.174641546125516	-0.147659490540864	-0.224831066153607	0.1477657962869	0.0861289923088286	0.0591467996228154	-0.0988571352716089	0.0826626772577828	0.135169879383473	0.0862627586207276	-0.12200660127934	-0.125990762387754	0.157619688520745	-0.21533652010397	-0.112985145258452	0.043291268447874	0.0976461028736005	0.195009124174824	0.221320082610173	0.0674393682219327	0.217508534947385	0.0750742076633981	0.0927754288578899	0.0504198576464256	0.0491843613186467	0.216095889863123	0.0156154655349655
H4009_8_non	0.258005585935727	0.337354895852427	0.171188985193818	0.238499476296604	0.222537392038624	0.30981570215662	0.184511794794147	0.164802311921178	0.137030118614094	0.176068497604729	0.103281705870436	0.112988542257173	0.0852755344542786	0.11950041049187	0.122410166503407	0.139758774070418	0.186026388943243	0.124459051503172	0.180603846492016	0.22706644001959	0.168538877668006	0.152033482256579	0.0902046189447213	0.132664878200468	0.112904364458013	0.136688162267887	0.110557702762486	0.14177660624291	0.158771780671348	0.104513512838774	0.193197148737303	0.220089910627231	0.0218629374118184	0.104586972262462	0.291993242747456	-0.0980188220089628	-0.0153742816560472	0.181608141695047	0.286535916987515	0.199744229294671	0.277706803073317	0.201593070296791	0.251420416530877	0.30007643026742	0.301710512766705	0.188812972801891	0.298877016015189	0.0796929370041864	0.220399546313951
H4009_9_non	0.245251094855908	0.180158910654605	0.0388515470731117	0.084322072554332	0.206149847471225	0.277389541453005	0.0960565038554606	0.162139810864928	-0.0487369390193622	0.178006987947451	0.121472783465652	0.173907297960253	0.0722897022790248	0.168648277915081	0.263752226745653	0.105407079806715	0.187485224945931	0.102182887793173	0.146995570538136	0.321354141604022	-0.00597861220432823	0.148652138008012	0.141980237565783	0.0666477982074155	0.0510367950016666	0.250438309360439	0.200918361461009	0.216335534883089	0.170378794263836	0.206604091202668	0.249137695601386	0.192208729046147	-0.0478264248251276	0.0255720846792201	0.171136704708737	-0.0575892703408875	0.0754074382114878	0.0509817084499854	0.174131168785677	0.209955027312878	0.207896292691236	0.20125986059055	0.279187687417281	0.321555888935088	0.229670717061364	0.206845873897459	0.152697404314856	0.276951118217479	0.165135972996498
H4010_1_UC	0.254885157275413	0.0563002150926051	0.188110769639408	0.212448957301767	0.108421120314732	0.0320353116132339	0.0934336731542763	0.175712849355706	0.133518004342843	0.208143525076422	0.0909913672026977	0.0933682418746205	0.084914648826761	0.15859591239934	0.0717656877079603	0.279832525761809	0.244233051402131	0.368746964622656	0.287400730235997	0.258353493695786	0.142260485335017	0.156353225164593	0.193227137182417	0.164381225224265	0.138944056215036	0.200026870897477	0.29038950374387	0.20887811171272	0.203883320930996	0.312218405271851	0.376145018021299	0.410100151883707	0.124113321044794	0.277895803008975	0.163705533863379	0.0199025809045962	0.00296425947929397	0.165153034755295	0.314335608756446	0.388871837583995	0.245487834332055	0.406859378530403	0.284665496756958	0.261383962786371	0.180829222686846	0.248680403106121	0.198346664264057	0.34854734074194	0.247149924669288
H4010_2_UC	0.105235382403107	0.0998370476564092	0.129834649392895	0.472284654248086	0.0184394147993843	0.198488316346154	0.149936405065957	-0.0178093004685922	-0.0512258934636306	-0.169129178725242	-0.123301687291477	0.00528231209051137	-0.0961510420857419	0.136028090209449	0.120773761578881	0.408525953147708	0.0851092379470539	0.00641807323623839	0.234218266545977	0.0510452172716016	-0.0559785533719954	0.107874367628732	-0.0956544043757967	-0.0337174438824011	-0.160664033988947	-0.0603608104059853	-0.100166246435493	-0.0766962819607909	-0.0387203100216429	-0.0270554461719815	0.152223990322963	0.101680887713609	-0.107768811078178	0.447706571364623	0.223285122135728	-0.0421077121928587	-0.115917343102053	0.15119843851514	0.410283275258868	0.0897584769218229	0.195543770406418	0.082627854338706	-0.131034982784831	-0.0766486168749158	0.330386689843775	0.416765982579986	0.351642516613246	0.373781714649251	0.540965889418458
H4010_3_UC	0.444854911418521	0.125294040840524	0.412162153221637	0.584025690674356	0.208119057456515	0.418430847978586	0.180871011452802	-0.128852458743779	0.3002139352037	0.00941627634236417	-0.00959184077529218	0.18640628672404	-0.056680196223452	0.264650251652142	-0.0980449195042994	0.602211657897858	0.383844663386626	0.224849029852726	0.213808886165127	0.41611810835264	0.115734453756736	0.234870556809798	-0.221139454411739	-0.101316386562135	-0.143261734175193	0.0112657119224617	-0.0222088182864454	-0.0779087895196445	-0.0779075842624565	0.2925360612587	0.353184471679997	0.314704247797804	-0.0567598621217924	0.405133922350373	0.34836928573447	-0.0137548410995481	-0.243302422572269	0.191127820921301	0.602153990245148	0.0963502596669677	0.298761149250985	0.0732297070452072	0.0854097715952582	0.136656123030953	0.488509274687276	0.563918635179922	0.430221790080328	0.516887942226887	0.395453954296077
H4010_4_UC	0.071797137984135	0.0324673691554436	0.065506428492293	-0.0422545709833992	0.0896486104955482	0.077480471706628	0.0590107666660573	0.0524007284141933	0.0353773688703863	0.179250244909362	0.145247527710897	0.0868118530942828	0.117877066749365	0.065692768552826	0.0324835814696255	0.0231000475950479	0.347492422276031	0.3760787919629	0.403461680983031	0.412582934880126	0.107045928998453	0.121319703629572	0.198669256080744	0.156586176494629	0.158879400350922	0.22199848545073	0.29144742425975	0.175758192051213	0.234924208912901	0.299041997106076	0.3950742674273	0.340604743712842	0.0164744233195719	0.168370978352926	0.170696838174588	0.0265425725179805	0.0869430968301748	0.213653248356482	0.122252195578708	0.408294079340629	0.296238973853532	0.421810232741429	0.330223061823336	0.264459830425402	0.149117821419155	0.161937767438823	0.06404696975449	0.208299511029203	0.0556464819576333
M2008_10_CD	0.258826245744793	0.263680213810118	0.121284561629095	0.374682245949489	0.259028163006151	0.217037185378198	0.122597344713351	0.0951636133269469	0.122026429803557	0.172687351903534	0.154125861451406	0.157766956667857	0.0920955706069154	0.202488300626593	0.172073376166309	0.452802403654186	0.231338163433753	0.189583237262522	0.252787682475389	0.231768165755987	0.302288194893945	0.212645621573622	0.340996917617677	0.299252023597193	0.190189270599396	0.242948559481582	0.20875446194427	0.15067750925122	0.218170081005824	0.24468616275573	0.260176164162745	0.214846419356061	0.093204392531009	0.324872234078347	0.315243298070257	0.0351511639418405	0.124135661372932	0.231098399255724	0.543881836423055	0.245418223869428	0.252170831331305	0.158731964225144	0.223452961695239	0.24099881808578	0.342581302843472	0.42889803749807	0.385414673103764	0.407847024279671	0.359237698052166
M2008_11_CD	0.243315824699233	0.218662869366948	0.126468929694906	0.328240473454244	0.178954030984587	0.203207141199273	0.145585840339301	0.0781359237748379	0.18790728370664	0.192986125773513	0.173871603016795	0.170577798252858	0.0994533092043153	0.187468163709514	0.182295367491648	0.332467436078947	0.257685645618118	0.233602531688523	0.206976630500664	0.217039210566777	0.313673350752762	0.185045933992034	0.305223075049126	0.21828742493152	0.195428649769899	0.247058339872948	0.128254377304051	0.153722862394779	0.165091297406737	0.231593796481698	0.276720118095681	0.177111715640907	0.0853127491114031	0.244930729548272	0.267727934508019	0.0979821640906337	0.141964249385649	0.166780221060176	0.3867448328802	0.237892545181347	0.265912590893224	0.177493898142652	0.156700305139988	0.119457803307879	0.328549125560317	0.417200397027793	0.301876564037348	0.363387168451859	0.275270089597633
M2008_12_CD	0.245920824876935	0.280276450630048	0.138834081728767	0.282531833048683	0.179359749078841	0.230683199258277	0.119016534348927	0.195413494549576	0.0928883909477632	0.16007024090552	0.126784761365241	0.173012402452881	0.169370102518352	0.157233062425964	0.189311538414587	0.20593751642408	0.218307414384995	0.146832056565672	0.236719414457457	0.169938296628269	0.248763859312579	0.167630311183595	0.264945927281311	0.305016838929054	0.303705404272827	0.286915942688355	0.215453172031287	0.202308706844461	0.181403318452598	0.240388138365929	0.145835323722826	0.149329996627318	0.013483484754564	0.328443682428612	0.189330068759892	0.284945045398631	0.331186329612845	0.251316072088349	0.273875516533724	0.203746069380946	0.268274447261286	0.0815486587534007	0.232254056994906	0.243306980614518	0.159627851695395	0.335618080035884	0.302557393828911	0.314062784644925	0.337953167471681
M2008_13_CD	0.27763808167429	0.117876491136064	0.139417708685703	0.456013497915213	0.120520196215246	0.128793053507061	0.106849965118419	0.0460682691940609	0.0813596217749931	0.152136424815063	0.125507128083454	0.162417772347894	-0.0285532901387772	0.114970357463328	0.221368839635569	0.469398173200627	0.289548937957248	0.349415940516911	0.260231785166504	0.278134093070363	0.22826902594141	0.242814781721859	0.355014400099035	0.223738514138845	0.126338805290901	0.234890867103855	0.235956380767822	0.127484273205783	0.139171872550973	0.259064529727551	0.335299787778058	0.271997674506444	0.0985181233389712	0.391195302099643	0.277990486647632	-0.0173138556936957	0.00838066672160445	0.136875440208228	0.544989770454903	0.362068286383926	0.278209116538664	0.447488724493755	0.24274680266583	0.210358929237367	0.188958816620894	0.444264278269905	0.361491251969036	0.522040564407344	0.315849787966381
M2008_14_CD	0.262802856970289	0.300615588533367	0.15101805921199	0.420396551866385	0.247906904845043	0.1809370146516	0.119572248739595	0.105111638444521	0.124959469587981	0.159968373669936	0.12990263185602	0.122311233335149	0.0773963057109089	0.146890344543864	0.128664767012027	0.381612439138704	0.198601524674778	0.227556363464101	0.250083572966139	0.269409602983734	0.338963775791376	0.173438233884026	0.363133613161686	0.253860452031828	0.22612289458677	0.33577115762743	0.195659075282911	0.268645892148015	0.251117048242979	0.191337413105572	0.269930264117744	0.158794254838425	-0.00917347536498522	0.375979825919394	0.31851795765577	0.0515769361425273	0.111552378913066	0.255919395339475	0.515551287169907	0.31984070989692	0.352800912261125	0.19504124050955	0.204437375360969	0.171508260290136	0.175557201026549	0.454235237736776	0.363696728492213	0.361944301208446	0.441575260280329
M2008_16_CD	0.266365424788692	0.100232137850213	0.0782064168713935	0.335320736498316	0.220832606252247	0.128888622643378	0.0906378898547956	0.0558485107447311	-0.0530844025580154	0.0576935900603521	0.0404769513288774	0.0884515513042831	-0.10557250749136	0.0422403717297906	0.127672167289101	0.342348321903729	0.233724391583409	0.22865921452411	0.188206301497415	0.270668441300393	0.292354574324073	0.256371102963289	0.284741648978201	0.245196802993925	0.171438987434523	0.195091438207669	0.159386083990541	0.180118070099766	0.167346239893796	0.181043036323482	0.307607682380607	0.164247253175498	-0.00429998663235417	0.451820623668146	0.352738054353164	-0.0108423962241838	-0.0392957254473531	0.119918537562524	0.519038712710923	0.253529235535979	0.337515207747157	0.295689110605019	0.213570457475298	0.209667793933138	0.298539002112554	0.482246398599536	0.376561841578292	0.42046802323221	0.427657761304354
M2008_8_CD	0.292132888424511	0.152884043032009	0.154933250482837	0.364705972321232	0.12011915894411	0.0792306276171287	0.0961030173549683	0.064964001927015	0.134084864964205	0.151561124647453	0.0991150577737601	0.114425657785162	0.0731514276813092	0.111534552053157	0.14719673645601	0.425439437050902	0.221837811691405	0.319705960744977	0.227622994511006	0.268316276893213	0.219268426984856	0.183883088127212	0.328412769305523	0.180354607054383	0.158304013519417	0.266299581283003	0.259273759755987	0.17403451489102	0.213077773893022	0.260113912105339	0.414676843528514	0.361209028846587	0.0415864140848221	0.310378364868776	0.16274438471129	-0.0396508982187527	0.108540563908191	0.152884964628611	0.481948987544454	0.37156675378095	0.252922174604257	0.415203175899284	0.243803412663235	0.255504999919138	0.267858112170052	0.454586691047306	0.27971765148396	0.477526040646958	0.289676013506787
M2014_10_CD	0.085907513956018	0.174372489932605	0.171541685724748	0.0171365968883551	0.0266920242943012	0.0844620273205521	0.0716118277652708	0.0933989288340401	0.171435438727003	0.232877446570227	0.280178731775918	0.153953827121429	0.113854315720113	0.104716194658856	0.213085228580027	0.192785376579711	0.194205164249054	0.348451368707498	0.248628472210497	0.284705311193415	0.116716166679181	0.158665012048167	0.152961886188834	0.157685291017526	0.149809636272479	0.137388599491183	0.253256896212529	0.157148087834221	0.102519513683069	0.16946135260566	0.302897773709235	0.266844858838123	0.205018220657366	0.0912193524558189	0.186666694788101	0.111313059757619	0.132552933373117	0.172011879071385	0.193366201187184	0.301137265176705	0.380954269386696	0.381835080122741	0.262972429410346	0.292080797852577	0.222423708781171	0.121340352634407	0.159691998653302	0.174708411189206	0.101269461680787
M2014_11_CD	0.132522257898673	0.105745063282397	0.165757403484398	0.0951627034670123	0.0808799180806155	0.117886727538498	0.172874538278855	0.196039105410326	0.178556261853782	0.302465058008084	0.256765526218553	0.227346067619007	0.180574175119962	0.236493799277272	0.196724968085157	0.279698910935035	0.166396296035849	0.307356052872695	0.241341972407272	0.244466430692562	0.103029393530958	0.155554804577284	0.166478118696114	0.170525043042224	0.156149576313639	0.173988914737558	0.211158197248327	0.0781136780210754	0.0537506061362594	0.257482704772079	0.353859304772372	0.317769610841719	0.223055961678087	0.105883614782884	0.170039651689463	0.149392558840784	0.192230068611727	0.186020241960829	0.266413139452757	0.375398864003566	0.228211766526486	0.385146847747386	0.305767488524402	0.232292645828658	0.291887100781796	0.221472945160328	0.154028173685625	0.23719481293359	0.170037493432033
M2014_12_CD	0.180724185874639	0.212742144173178	0.0801639749796681	0.108443849457342	0.104572807364212	0.0879008057991559	0.263879273379303	0.0588422358483602	0.0572355834986483	0.184835289961085	0.217874829225446	0.174808623138442	0.0931383828664838	0.0317663456944493	0.214606603702174	0.187747303035547	0.184528108883147	0.342860376726126	0.243950314817756	0.207386102514811	0.111498347557406	0.0866713348194805	0.14265613741896	0.0820662995025034	0.068206001151543	0.141704829225594	0.197042833137453	0.119152597191566	0.152004354241927	0.198936390926295	0.331457790586142	0.300736283173173	-0.0274027956971367	0.178859301433034	0.175450981153699	0.0710812457737339	0.0778458533478425	0.167624213889984	0.350537153973748	0.340491876139232	0.282278519345103	0.265363232467498	0.315100067289826	0.281147546731898	0.278655845636763	0.200878735970099	0.14062421776797	0.186910242514382	0.271241873729023
M2014_3_CD	0.13317591355999	0.0674524798378447	0.196982133980296	-0.0483945605854758	0.186836422693509	-0.0483968635286158	-0.0940460560535143	0.0668448155189651	0.08192270486046	0.00294791270998955	-0.279953186429111	-0.101709733629218	0.00543350084332556	-0.000406028601342041	-0.0599657095946597	-0.208969879544043	0.0124441400228693	-0.0419300288042538	0.0130219722045461	-0.0658063578301215	-0.0580192651369612	0.0275454054071755	-0.022250676589722	0.0418312481090143	0.157853496134825	-0.00483594935159439	0.237406601504907	0.160233230379021	0.0895405903187462	0.043295978780394	-0.0467549701744663	-0.0395883071382904	-0.0454170556730106	-0.0676200048464769	0.0106710819436658	0.180121129799475	0.161903112771228	-0.0252847184743356	-0.123177467885561	0.0653101225154784	-0.039319073290711	-0.0307177689049629	0.0464730609746286	0.10503338215565	0.000913703710078893	0.0308842830941113	0.165263101318661	-0.0710671440778222	0.00974642734529694
M2014_5_CD	0.169413554293046	0.204578818460183	0.212156887939863	0.0664160167366675	0.213625032720456	0.114616646141341	0.103809660293372	0.159872512772636	0.158906727579416	0.28851987168619	0.031491525496706	0.148858982842433	0.0611870006152	0.0941592044330285	0.277144056857832	-0.0388846946888447	0.123795674086407	0.0490930613507061	0.096686747147162	-0.0342119327726541	0.0305062038272788	0.15459198579026	0.196097408631498	0.212558709461018	0.263127874624318	0.125852704961033	0.261449678217291	0.184011665892663	0.220706286145103	0.101826797738543	0.10983186611544	0.147397728676503	0.12267388288115	0.117578283486168	0.0491022822306132	0.245225986824268	0.322292659737262	0.23903961847523	-0.0731477681299388	0.130897545322889	0.0477726960762929	0.0923568330839607	0.107534094197141	0.273181620736084	0.0564747487662414	0.0523690052686935	0.185118163185007	0.00623997832287974	0.133198228767091
M2014_6_CD	0.205933330208007	0.0582469309174864	0.168978887936008	0.0594810534101572	0.124035452348913	0.0742433319984612	-0.0899640266773019	0.266262382085537	0.0333998151495864	0.160795526562948	0.00981615459032898	0.200437930511164	0.00231042261700151	-0.0192415907084235	0.0127090273717982	0.0163224142958729	0.0760726371602051	0.0660175500694479	0.108673545129957	0.0519483627071111	-0.0231967385733921	0.0645972982496231	0.180445978551072	0.175370667435057	0.0978467050956038	0.0258361544271271	0.213912272091026	0.179434026689127	0.0889754169385462	0.0917422682075949	0.119569558884211	0.0906063021282525	0.0240650858986139	0.000551023154306892	-0.0542410189969076	0.103338264026672	0.0177112100171318	0.0340420858480022	0.0637217434655057	0.0993055152494414	0.0429418312237633	0.131936705937583	0.185548637706751	0.196521916675882	0.0601061043974343	0.104112613803924	0.260392344809682	0.0452109308828311	0.174082476916359
M2014_7_CD	0.106298369999311	-0.0507058345914862	0.126068864635755	0.114818801942106	0.111288419919348	-0.03037195811429	-0.137162812935663	0.349846677702693	0.13985917182125	0.0761382308022844	0.029734592401922	-0.00638475866924136	0.105850327128442	-0.0255967310662183	0.155791052021995	0.0254060635867502	-0.184189441731133	0.0399829754245783	-0.0768730143077085	-0.195471451876236	-0.168685037739129	0.0731148347081588	0.132466639513191	0.0942962528614816	0.13117350567762	0.0237515204282539	0.189382267786184	0.210497661966095	0.233755522714036	0.0180770232751518	0.00865521721357764	-0.0840579712386853	-0.189151063863455	-0.0641427854195407	0.0337141093009082	0.127982651914083	0.100085623046913	-0.107113590709	0.00516465775644217	0.0639478477771179	0.161409671622659	-0.00656967375768376	0.116224037403392	0.219632508765532	0.0333641217946032	0.0884750216734879	0.15123659535779	0.0585429497891801	0.109810004525344
M2014_8_CD	0.234341572277714	0.224877856974576	0.222943249820835	0.194187580787804	0.154826017711238	0.12892286892164	0.212974118755328	0.120106784356011	0.178459199120623	0.24299251307762	0.123302456322474	0.346188509918605	0.187631045569	0.176267407595446	0.279196923598363	0.250757306551273	0.251383171215795	0.32426752825168	0.268332361405893	0.26880890869105	0.102164509493361	0.159753173703369	0.108903247767528	0.11864268082214	0.169910513202978	0.126795761898451	0.276811044281193	0.152508317506696	0.0747081904137688	0.208662934704003	0.327706918708431	0.302489141461414	0.0518190955356858	0.0900757449355218	0.155223478534115	0.0682529612033725	0.120661989085968	0.141986322217624	0.23592472150691	0.367772736780878	0.262927656756751	0.311084112811506	0.312575857887815	0.316741780267921	0.171238858144291	0.219154418570648	0.268659164234747	0.283526523133901	0.239459990981655
M2014_9_CD	0.123988953409357	0.126293985235785	0.153707107784339	0.0940418653059829	0.0698952610928198	0.161197388726024	0.138773970432798	0.121947174657276	0.110165738782439	0.294191481690195	0.313431769283472	0.308264591463542	0.105785632005108	0.300043032738506	0.223173233324171	0.290476534675316	0.234347796445154	0.350225654513799	0.284995114840776	0.2982936594895	0.0577191803275128	0.170334377197704	0.182137024455416	0.0676385364944166	0.0405691807588155	0.155983424211992	0.148137173047547	0.0572539481717818	0.0686947120448636	0.255199878398627	0.407358275275696	0.372069070910001	0.154004441113183	0.247773017858931	0.188352892963988	0.12340332092363	0.207811056146099	0.163827258539286	0.339203543298294	0.366920019499513	0.312037354446244	0.395148260714507	0.28109741452269	0.312120664245256	0.224793256195016	0.269565670832102	0.104612136899215	0.277941633498122	0.224828156106838
M2021_1_CD	0.377543839077681	0.193259338402945	0.239607531092531	0.147662241300779	0.204921181995262	0.14893919629355	0.219699058570076	0.194594192747264	0.133416410996929	0.235116555386018	0.360669233338658	0.206680926740452	0.280007661204302	0.143835587061013	0.27070492919381	0.255193109786055	0.224615458827344	0.179717105034119	0.266382439553981	0.21847769633216	0.194228738911361	0.219388855781827	0.178734153406718	0.132762846629084	0.228205301262941	0.179683120539417	0.174049312401369	0.164145093277127	0.208053262766305	0.280291155723277	0.269494583944075	0.249135658023325	0.0785388293198221	0.200437318372166	0.283195665977924	0.0804876113629754	0.0839115484574914	0.130134013362276	0.393651389333657	0.324148952309154	0.35303105646721	0.246260077661279	0.418812079948333	0.363098613723631	0.37285974053722	0.270589754015613	0.275280392045196	0.252432082263425	0.278563309569143
M2021_2_CD	0.313322014643049	0.262808767827466	0.246637925566306	0.184885464189328	0.218385390006407	0.140895203784474	0.206526069885524	0.135355028143056	0.0977623830468443	0.143825343270027	0.198983575338955	0.229896203556381	0.154374861607733	0.198072454769159	0.244288376546631	0.283710091770196	0.273321358443442	0.194710401570507	0.287931430358359	0.295941093156773	0.164982228120676	0.206987125819385	0.255419074002458	0.0681214091684592	0.161355914742853	0.273607411081144	0.216119885839962	0.182374534307683	0.135130770620287	0.333056210807539	0.21193228463821	0.253783352356571	0.0519972129142888	0.216233596701443	0.183719633804066	0.123675838686291	0.0731619679392133	0.14446888627901	0.331669241624268	0.268565475825128	0.308661621702905	0.13090914686396	0.250567667288452	0.187276664280269	0.268953108928165	0.343495000522329	0.207212101470954	0.305536386977403	0.272406080917378
M2021_3_CD	0.168928104051546	0.123305636175839	0.0433571871227583	0.0261965229159021	0.0255765531050115	0.0875310322063566	0.117607341140732	0.0463767711639174	0.0526001886618273	0.0424110752335976	0.0150737036737593	0.105162004924742	0.0543189581274518	0.0327043607217885	0.0139291370556	0.0725076488901659	0.26988530779978	0.230420498888091	0.276059264942855	0.118197495976234	0.089851737798383	0.179235920108609	0.141079913873319	0.0489847165952016	0.120930841954724	0.172403667681263	0.168320100878245	0.181780265457718	0.172434306729138	0.312975702389149	0.270598439048235	0.264764337774566	0.0940425915307607	0.150287693251182	0.276999610195072	0.0527674134394394	-0.0493920204035378	0.129524433118799	0.293281187785546	0.241011525345736	0.283868445746184	0.282138293405351	0.309459101690811	0.357714282893294	0.209824425800667	0.179737093176093	0.216022755689147	0.217206950277893	0.172999126907711
M2021_5_CD	0.328954103554397	0.330298708153569	0.322315467676276	0.241433813945067	0.336494587807458	0.273363392831186	0.199482138568616	0.313908971265596	0.21686254884562	0.223790884851363	0.216197014432619	0.214989262464677	0.238803941629683	0.2881690483083	0.335038799356483	0.249878649104287	0.254343969097021	0.219405533122838	0.259229505416993	0.297237264910735	0.156015930120111	0.14444043319894	0.2418505175222	0.146745185521783	0.266709902053486	0.258742962121153	0.220441473301014	0.227284452788509	0.126817804469752	0.262000795359435	0.201281019490793	0.161731334153955	0.149277465905387	0.17700693893867	0.139133342224557	0.216590215855727	0.23224485596072	0.241518749087123	0.190607214461438	0.275116058303489	0.287074441489376	0.18597314371291	0.183798790899821	0.198703325442718	0.266645854086181	0.230082264765677	0.248005656871205	0.157525266295606	0.221711391123197
M2021_6_CD	0.337494078243092	0.226884967479224	0.254922173622251	0.176821734823781	0.225152616631348	0.121296498581323	0.24352618674318	0.224701229513003	0.188561823791411	0.174724735412415	0.239034730334211	0.206785534115826	0.240747794736662	0.22219277747628	0.221766150256116	0.22796940600919	0.284413363046715	0.260959496822242	0.338365190846837	0.359453357376979	0.17538107723664	0.118027926208898	0.196260189539055	0.155150450488675	0.153191601555133	0.248897396889797	0.222252766284459	0.200159325158049	0.221408291978078	0.274629576527176	0.324663151707627	0.257977301744637	0.149638098815818	0.218441493612343	0.166713553407053	0.100899815250714	0.128993929027532	0.237258232244097	0.266416390088282	0.315028761158688	0.315816870710719	0.270791399526303	0.283574189823608	0.259350778941403	0.15621452725549	0.350094406508645	0.230915839848901	0.201290327896395	0.213688246659419
M2024_1_UC	0.193781564750245	0.0445648363657311	0.099820169450103	0.361911967901919	0.0247573717615404	0.0938954853851419	0.134656160407658	0.00850100276602654	0.0259773317370223	-0.0426084525661813	-0.0717562844234673	-0.00827513803393845	-0.126724095075458	0.072551384976111	-0.14138984637094	0.466179195251133	0.168505186745435	0.140280885700387	0.198929646186487	0.16563614459881	0.283923860503415	0.250354502096747	0.281606048473698	0.328241452082195	0.17352208030098	0.257099381498377	0.0892431182121689	0.169949596404257	0.229980498935051	0.15206089273109	0.232535334854171	0.220097255767959	-0.064900757868193	0.38118023898995	0.299275613753691	0.00423685010119769	0.0496099982318699	0.0769867367766301	0.51032570818943	0.177157016101791	0.198458606047545	0.20875526974479	0.00551080950889833	0.0774707852611053	0.196241751749769	0.472681887405514	0.432594967116392	0.485975993994983	0.380534907019019
M2025_1_CD	0.25193191575941	0.117105386053368	0.153513117825806	0.112263347918858	0.0984749173479547	0.0957035846030021	0.037738394818629	0.0179173542257123	0.0930151914201122	0.10321803698678	0.136540621842463	0.0875180722591996	0.0357661678815187	0.0759465417607539	0.0577667508112449	0.23151797507209	0.156494284033103	0.16394001958105	0.268164323428434	0.303130661469646	0.10417907593272	0.0927842507832802	0.0898391092262277	0.103150575330156	0.138159358939801	0.167382389646938	0.187223006881457	0.158717604649442	0.0561938785683775	0.222640323155629	0.29185920072565	0.282624739793185	-0.0537628192419268	0.106906076803681	0.117181008756856	-0.0107740367977901	0.0883711895132286	0.0879845103991354	0.177480388749039	0.242586151452493	0.160129008456327	0.173455777432209	0.253455203363636	0.224279696824423	0.109929916442088	0.224684493410238	0.186885592221448	0.207157685819369	0.136409949709426
M2025_3_CD	0.318582128869812	0.192180807713591	0.248259965085447	0.279196733942789	0.279292230373444	0.111830909927797	0.210804347732327	0.208400247468964	0.180937715916705	0.235261430449382	0.148926628034486	0.0726362991709008	0.0632387506160706	0.147996879300834	0.0901376095708321	0.293573966243936	0.216552892295908	0.189677484476804	0.262023736529495	0.302273540660065	0.224150006101734	0.199325544078302	0.226751959390083	0.203349783037269	0.118610748215407	0.262090286711027	0.177311752005893	0.188999110531477	0.200517543107349	0.313840224078429	0.310241609425704	0.310984974787221	0.0580036000255195	0.266402949534982	0.119598295024647	0.20321364006747	0.177579608560327	0.19059382530485	0.338911496473904	0.328851491257279	0.311035822400937	0.282268648630758	0.292257334987715	0.256361321376584	0.301497017220529	0.332797055957835	0.249424516595905	0.294759807133914	0.258275194618137
M2025_4_CD	0.257916700203816	0.250581128967691	0.262185623015663	0.234468657049364	0.242217479499512	0.133593419339509	0.188911228629479	0.19695350497366	0.206786453266434	0.182323927327878	0.213116810420903	0.193289337067093	0.215819980341553	0.105741982874622	0.192734793963552	0.162043412563658	0.208958280897086	0.144252753123563	0.258197839178828	0.260044177160092	0.148187916101295	0.118097142907154	0.263229840299639	0.244190639713326	0.244523373804228	0.241159507853274	0.166502767456436	0.235323367041026	0.254413124271337	0.283247878804638	0.212577981566942	0.215598629843429	0.0206596498708822	0.108946039463734	0.0746239254013927	0.258853713835617	0.345183527395135	0.274630915351476	0.151713215331205	0.280925013485839	0.273578908125263	0.212906134621466	0.245332563919784	0.282916543425028	0.194268483067027	0.148232035284998	0.254869744015837	0.111596144182686	0.261003602811654
M2025_7_CD	0.199352970240991	0.112455260655124	0.168990971975383	0.133911548312672	0.127533443225077	0.209330811444583	0.112690925987436	0.137858521509383	0.138710243515237	0.0747139654310971	0.0506834462718598	0.106978681727343	0.202106477779632	0.131014496690673	0.0962067039455187	0.0976097305896956	0.260255797832278	0.250223575514415	0.22027693794128	0.201213443085495	0.103525523228081	0.143547303627668	0.104038935022915	0.193365165184619	0.120620886779365	0.245253828916667	0.178451177344665	0.162828793371326	0.194696313223872	0.270429815628587	0.295885227758361	0.302093885949638	-0.00660614889769543	0.129395753199151	0.158705812091514	0.163577599547378	0.187500213310039	0.2192851958533	0.262818485288023	0.295522593414214	0.248477563844312	0.322809367953067	0.262367688077442	0.300914388045784	0.186871725587022	0.308410208104456	0.148129495211662	0.290057892187443	0.161109494582378
M2026_1_UC	0.256001380060003	-0.177072405741071	0.322217781086519	0.420982345749087	-0.140163096821785	-0.181908251078215	0.13993049047345	-0.0546041071177669	0.0342701487412974	-0.223038169789996	-0.0814138675559324	0.065959436972722	-0.156051994240402	0.131499529516143	-0.0469420386435925	0.41050285784264	0.111746836470433	-0.0458399118801963	-0.108821437516502	0.109847095100518	-0.226467466435479	-0.0406239679462973	0.164570693779295	0.0759612032766318	-0.19140361176111	-0.181247399016533	-0.374511549929742	-0.243031407677884	-0.352674401861683	0.175554197204338	0.288689687975847	0.287335491439917	-0.0239598108527881	0.4579974834647	-0.256862216973067	-0.00826580714191617	-0.27566729663248	0.269592963031564	0.487720188307967	-0.199532783969069	-0.0715233396637845	0.17968134147847	-0.0439944405898249	-0.387231188954061	0.0670954597591231	0.509523934087686	0.496040212996978	0.450842966421653	0.581833426638366
M2026_2_UC	0.349515397101076	0.0539238222061678	0.333013097012995	0.551005291525209	-0.0925045544188459	0.0171591854762439	0.210957754526348	0.0814997453698877	0.124723075008277	-0.220633377200355	-0.149719916203091	-0.0399258234000539	-0.340938952230433	0.0611566557857789	-0.106596847223264	0.586795226211612	0.00611630299477241	-0.145478016759915	-0.013017179915262	0.173443379387913	0.126359084634463	0.247197313617708	-0.0761355749747273	-0.0153540804122177	-0.408424375630046	-0.211714654981334	-0.372560501957557	-0.160385857196313	-0.175881630982412	0.115603349463992	0.142158169263538	0.183810463218721	0.254679065592509	0.525115290988898	0.219941230081249	-0.081861168626628	-0.406654065534827	0.201672314296829	0.632813163699675	-0.146028271364394	-0.074686158963798	0.147848267937543	-0.27355022950294	-0.238675791206379	0.627809581615495	0.552643254876127	0.509705603860693	0.587202904619161	0.479982944532979
M2026_3_UC	0.235246471460671	-0.0683206862841882	0.183257319894662	0.530143372025717	-0.0970860294592562	0.353761899419475	0.0192582835650235	0.120407639263682	-0.0149214441019844	0.118022078262733	-0.0400590041678873	0.0512168562225111	-0.222898258616669	0.101441294275908	0.273833128001192	0.473608870091765	0.0389184537184306	-0.109888140209731	0.0272470706686901	0.0136343764808435	0.18575426183642	0.24444113327757	0.158928484882084	0.148246375035948	-0.283472489405101	0.0206662400968905	-0.258719400334988	-0.183555003724582	-0.156284238991624	-0.0432187425941322	0.223934103789911	0.151867680688163	-0.0506457619416472	0.416440061320538	0.177949586644941	-0.111226037200389	-0.114606606206562	0.156374968986113	0.646471215457533	0.245034589854102	0.389904405076713	0.242086895158914	-0.0292368442865156	-0.0946083631501629	0.10470691898651	0.527629185041327	0.418196417224453	0.512653079567167	0.507993609172035
M2026_4_UC	0.274939696651005	0.26657490605248	0.212465267997064	0.465007113266077	0.0690490270287258	0.358506634934675	0.355526397735757	0.22269978073495	0.0805832021218361	0.310096821797988	0.211817944836166	0.23213822851269	0.00933529904351957	0.299633483534761	0.365438479096619	0.553880296505436	0.161873302017037	0.0664775954917096	0.14364631186525	0.0736958657361812	0.255479739491089	0.424652587536248	0.302835221479423	0.185213325613965	0.0262678373878925	0.162131538548452	-0.116873317843352	-0.0306783075874199	0.0671639736005332	0.082151652388709	0.177320667300764	0.150401500594381	0.133825990532037	0.381725556895253	0.182991752337201	0.00525178392500329	0.108482196272979	0.210252321519619	0.603859935334379	0.185438206435534	0.240941779914766	0.171314825585203	0.00776597639016482	0.0927856664136105	0.380059507603019	0.526108629400418	0.336827919582777	0.482805125498778	0.430153547410005
M2026_7_UC	0.157310242306137	0.230263640780088	0.138106551240216	0.372112574327797	0.186470053096116	0.157794543476081	0.0784255327325075	0.0985124157565195	0.00922460053740538	0.368017397041898	0.333052729466602	0.352666820803622	0.0506552856580203	0.260208323740254	0.494018774916427	0.462591701578179	0.0522277129217995	-0.0225631216193799	0.0394270156466608	0.030631922487917	0.281115625335032	0.31133798509312	0.25065302529974	0.273568667793695	0.170840369110708	0.0584095952566737	0.0171746592880735	0.0503279317360429	0.134973751114039	-0.0261483602286941	0.153694156457253	0.11568941808778	0.135191312903429	0.388196237871346	0.118806773876609	-0.070241502139441	0.0473205441068462	0.111303226070317	0.450656915872146	0.141810336971914	0.249522506289572	0.0511039972482366	0.112836126091276	0.158074660021934	0.00695448607599065	0.307724182587252	0.30004767515671	0.263732652960506	0.467769574580244
M2027_1_CD	-0.0359482772689911	-0.0579150464314068	-0.0330509494259344	-0.0703094560660285	-0.0154711860392937	0.0454483069453947	0.0111425292090504	-0.0105829927621706	0.00837110727351044	-0.0640031577839079	-0.0951611030135331	-0.00052890777516971	0.0413082168555116	-0.0483994800177455	-0.0838897059014442	0.0150260777038961	0.0158454648621118	0.119031131101597	-0.0115967040200965	0.181918202954925	-0.0313992135071785	0.0901197061053414	-0.0438235085796371	-0.020187310633916	-0.00859725545577454	0.0148302357913384	-0.0868626655207487	-0.0504303309357647	-0.0392963031688922	0.0011063932433669	0.0572477843915951	-0.0137197769040937	0.0701383636981654	-0.0667197208940609	0.0747662074035004	-0.0747718408968336	-0.051074336786225	-0.101340940472393	0.182488378192253	0.0400755110716527	0.164844730091138	0.135728921776197	0.142256296991749	0.156604988781081	0.215437291061219	0.199042726457105	0.00155580164200993	0.143348181919973	0.105384888207024
M2027_2_CD	0.089791383487148	0.00877625904946808	0.0556157360533931	0.00805715277693701	0.0730035852406527	0.121469313857718	-0.00811396574401852	0.0755443199628066	0.0465565641557477	-0.0178565822905628	0.00818742383791699	0.123288546683254	0.189117714354747	0.00394307471996164	0.016624225449107	0.0225345308730738	0.216541064152487	0.334574515958611	0.250301088623738	0.278169020767165	-0.0095832223644901	0.0791205884487936	0.0832953076923756	0.0758343005843448	0.0260954583191389	0.164308292460662	0.206409334763307	0.122682039969168	0.128794911988017	0.225496595939797	0.272981545455117	0.229147408596859	0.152398235523604	0.19104255234424	0.0900764873489383	-0.00436585158078164	0.0461360744738083	0.0859576428339841	0.388544245167299	0.335903766425252	0.206028448204541	0.414442068503833	0.248143247841858	0.263870854166801	0.190447481761232	0.183034576741649	0.145852853657642	0.319173928635135	0.199954329508355
M2027_3_CD	0.115006396744222	0.0307435677200759	0.0552550959800623	0.0902361309560451	0.0516201437503901	0.14617127334876	0.0338566563414896	0.0496423455334037	-0.0121139176895421	0.0145204848889007	0.0239041116945223	0.000797270972510954	0.0019093236326113	0.0574843335106214	-0.0431622299791555	0.063078913573663	0.190248945462362	0.231831894670223	0.162285815579935	0.324185194238004	0.0198772489151713	0.078375038770959	-0.0686391423411068	0.00845198170721618	-0.0843900173207824	0.0883697144447792	0.0647844368068928	0.0646925400101049	0.0187370147884713	0.0668358449007367	0.173538576328936	0.132808751756424	-0.0429307534825671	0.0642109057179493	0.0660973933510679	-0.11105096803183	-0.109392182155915	0.0668626383705028	0.246802138505616	0.105971177209382	0.212573377120428	0.160820815228374	0.123489848560298	0.214626355106921	0.214690862867592	0.175991621842513	0.221338455602593	0.317381332993458	0.131563544421409
M2027_5_CD	0.0355760392410537	-0.00874683052568787	-0.0631082710302729	-0.119028764052484	-0.0197005021945316	0.00573115787251108	0.0182518793743415	-0.138153622494611	0.0617206502680497	-0.0574517289689406	-0.101316820887881	-0.0696445624592307	-0.00302811353905738	0.0168498704467023	-0.0467456174063446	-0.0210516163421219	0.15939294147177	0.286485375428804	0.0678767352520485	0.275223164599588	-0.00503321239563423	0.184043946169068	0.0727768021587167	-0.010561664262321	-0.0635425310608869	0.12960702377554	0.0985586144843303	0.0668973674009537	0.0627955334859719	-0.0244046457825203	0.0986975362037062	0.058192579659915	-2.01633846332953e-05	0.0566363760388815	0.216104463587459	-0.192084000717685	-0.0618069048656624	-0.0308398473843162	0.22849956567539	0.0951235847506326	0.140324438653391	0.171322202412153	0.140831800721011	0.173639738259824	0.15000950580649	0.266157111866465	0.11718002758903	0.328214338356051	0.326809503467838
M2027_6_CD	0.0706386387642448	0.0273740728775454	-0.031448380377666	-0.0341498955926774	0.105484229422153	0.109269763250217	-0.0218546728204047	-0.157091906682755	0.0757096534481914	0.0204308292996061	0.0468964123287588	0.130772164821452	0.116873992722634	0.0539724060526905	0.0226279309592539	-0.00247527199554317	0.206525584704441	0.263463003763739	0.117694945104668	0.256316290336631	0.106069853404247	0.186148865033036	0.142194013141851	0.0203996538646872	0.127528429908326	0.178236007102873	0.0646343080254269	0.145913339769335	0.134520075085266	0.0561686563095759	0.127878978622767	0.116408363883962	0.0770635930466729	0.214701450878041	0.274704659795992	-0.0389101485200835	-0.00580618206944428	0.0243176277328506	0.232031842083502	0.218684487732547	0.292262848867287	0.229753042775439	0.179790727424726	0.229847697990875	0.280013447509613	0.32169982940303	0.121651576338333	0.177730474405028	0.228303944748937
M2028_1_CD	0.324691474417284	0.140642029963098	0.0416218905182583	0.0896887294745504	0.293366813009176	0.152448960060747	0.095935262537576	0.160637285530575	0.106932775942666	0.055673224333164	0.113031894574582	0.123726977991852	0.0720637462598833	0.0116457981326908	0.0722823469763507	0.080023775600732	0.31021967205683	0.220646716727507	0.257236846840671	0.259339615052867	0.133673851402742	0.131193782600578	0.197249463451418	0.200764485244461	0.179093461010829	0.250868695713977	0.199809395752801	0.200245071740644	0.253066499190076	0.2866254790501	0.257946703032264	0.230779105502303	0.00803841145135589	0.189448446885282	0.233070883435684	0.119378889599581	0.130421668013827	0.0913216404082134	0.327445614928181	0.258175828382873	0.251656666011289	0.252687711342939	0.281135365445404	0.314193048870665	0.439921805243715	0.25905008804347	0.226277123190991	0.306076267025002	0.280689683233935
M2028_2_CD	0.217870237496607	0.105069741488492	0.0767236697530143	0.14661290482234	0.178511016533543	0.0428431255950157	0.160980363578496	0.138768368025388	0.0345100333245297	0.0704304062057324	0.0869025377271387	0.0966470654986667	0.114776306459696	0.121400177059456	0.137550224171879	0.13987574424236	0.20773157198109	0.123262980847902	0.279831488283278	0.202112498525677	0.245938834733612	0.207820701051777	0.316714867298164	0.282898772524263	0.307473535554019	0.272993440025475	0.198585429244842	0.238193909743825	0.289341242374001	0.295871972742521	0.140665547374511	0.158537452506945	-0.0283508234059346	0.206160102316043	0.235336502978621	0.189039460516284	0.14708549864601	0.182813591363594	0.239044560532601	0.13149698416114	0.190097336027155	0.139591903377731	0.159498031915801	0.247735547486573	0.224287285168225	0.234902861931071	0.240945188908869	0.168020037885828	0.219539758495297
M2028_4_CD	0.294328804752765	0.210435435848937	0.256860221688122	0.190354971583391	0.239341115409715	0.0900675650456983	0.0601347498540778	0.189534101373789	0.208190632505579	0.0382231664119335	0.0698882445037251	0.110524413307371	0.152581563786956	0.0616752347941601	0.0993854294039431	0.0394164431972665	0.25668888632075	0.176050632148592	0.356225280464573	0.305753868438114	0.182414708438632	0.190360118164952	0.257414164618983	0.281920927506818	0.316243268874785	0.262096641047811	0.233330849552152	0.259882148049396	0.268134484188755	0.222563659242661	0.179200814909717	0.105315328633557	0.0431663534623842	-0.0105485619040105	0.190954875576876	0.205919437835035	0.201466615230945	0.139246974935628	0.187264178871498	0.218079318891648	0.168779710235601	0.0895014647919953	0.282141477323047	0.276382469836049	0.226239183462041	0.196782238100301	0.255847389710527	0.192490124014401	0.16010125449619
M2039_1_non	0.237396638987702	0.161328771609413	0.113080748755588	0.10073044095591	0.060087062362508	0.0826477957398648	0.119404096770117	0.0932907026461906	0.117614792813509	0.0222558196256733	0.0588711654694653	0.14064098883195	0.133403825987123	0.0900806949393138	0.0171372620997233	0.133899037448026	0.271217108833005	0.296363005794468	0.298194305051619	0.297984383265381	0.239974579682257	0.198877843737207	0.23614756494474	0.25837892335059	0.243135419703509	0.242557607547933	0.251326815959817	0.188713193836826	0.218001181325242	0.304290249329966	0.332981976440047	0.346080181983823	0.053765441817394	0.152312500258892	0.181082111789982	0.167231774990964	0.202431776959491	0.248779205806692	0.277814746757758	0.359842784773255	0.245874848954326	0.357646699406229	0.314085683564665	0.302950955761429	0.19627815109207	0.272487096086802	0.230066955502435	0.334035369010748	0.212570217687405
[truncated: 98 more columns]
